# Supplementary material
Source: publisher figshare collection journal article supplement (https://gsajournals.figshare.com/ndownloader/files/30747088)
Supplement: Supplementary file 1 [file 30747088]

## Sheet: Cortex_v_Cerebellum_DEAnalysis
Supplementary Data S9
Tables containing differential expression analysis results of each comparison between the cortex and cerebellum in M. musculus at each developmental stage.
Highlighted rows indicate genes considered differentially expressed, with an adjusted p-value < 0.05 and an absolute log2fold change > 2.

## Sheet: Mus_Ctx13vCb13
ENSEMBL_ID	baseMean	log2FoldChange	lfcSE	stat	pvalue	padj
ENSMUSG00000000001	5169.4	0.403397	0.0951258	4.24067	2.22852e-05	0.000128807
ENSMUSG00000000003	0	NA	NA	NA	NA	1
ENSMUSG00000000028	621.234	1.82178	0.0972116	18.7404	2.32e-78	4.96481e-76
ENSMUSG00000000031	10096.9	-0.58844	0.107174	-5.49051	4.0078e-08	3.3859e-07
ENSMUSG00000000037	296.701	0.193497	0.118128	1.63804	0.101414	0.231563
ENSMUSG00000000049	2.17764	-0.464184	1.02648	-0.452211	0.651117	0.819482
ENSMUSG00000000056	3399.58	-0.116816	0.0783167	-1.49159	0.135807	0.291036
ENSMUSG00000000058	171.845	0.291331	0.143967	2.0236	0.0430111	0.115977
ENSMUSG00000000078	1742.56	-0.409442	0.0839947	-4.87461	1.09021e-06	7.67117e-06
ENSMUSG00000000085	2311.78	-0.402813	0.0541001	-7.4457	9.64334e-14	1.42444e-12
ENSMUSG00000000088	1691.51	-0.0119934	0.192826	-0.0621979	0.950405	0.980181
ENSMUSG00000000093	220.076	-0.827634	0.271471	-3.0487	0.0022983	0.00904855
ENSMUSG00000000094	14.6214	-0.640946	0.43905	-1.45985	0.144332	0.303997
ENSMUSG00000000103	0	NA	NA	NA	NA	1
ENSMUSG00000000120	758.734	-1.33258	0.221119	-6.02654	1.67506e-09	1.6536e-08
ENSMUSG00000000125	301.887	-2.47628	0.399724	-6.19498	5.82919e-10	6.1085e-09
ENSMUSG00000000126	147.697	-0.584503	0.14583	-4.00811	6.12059e-05	0.000328333
ENSMUSG00000000127	970.699	0.0862469	0.060858	1.41718	0.156429	0.323167
ENSMUSG00000000131	4551.87	0.0201206	0.0601649	0.334424	0.738059	0.87498
ENSMUSG00000000134	1451.84	-0.116421	0.0941997	-1.2359	0.216496	0.411235
ENSMUSG00000000142	2549.27	-0.545535	0.0896422	-6.0857	1.15986e-09	1.17364e-08
ENSMUSG00000000148	1027.19	0.0548001	0.07828	0.700052	0.483895	0.695105
ENSMUSG00000000149	3292.89	0.0272486	0.0863161	0.315683	0.752243	0.881954
ENSMUSG00000000154	10.2017	-0.749186	0.663313	-1.12946	0.258703	0.465231
ENSMUSG00000000157	1.47464	-0.877448	1.2889	-0.68077	0.496017	1
ENSMUSG00000000159	3.7113	-0.00971053	0.90523	-0.0107271	0.991441	0.99714
ENSMUSG00000000167	104.37	0.00218743	0.178251	0.0122717	0.990209	0.996446
ENSMUSG00000000168	1313.57	0.0263508	0.0987474	0.266851	0.789584	0.901682
ENSMUSG00000000171	1898.1	0.0953079	0.0693192	1.37491	0.169158	0.342523
ENSMUSG00000000182	6.13458	-0.334001	0.608233	-0.549134	0.582914	0.771766
ENSMUSG00000000183	0.589183	-2.61845	2.29038	-1.14324	0.252938	1
ENSMUSG00000000184	18495.4	1.81208	0.187324	9.67353	3.90684e-22	9.76946e-21
ENSMUSG00000000194	2497.32	-0.081812	0.0547715	-1.49369	0.135255	0.29007
ENSMUSG00000000197	1060.02	-0.578703	0.115981	-4.98963	6.04965e-07	4.4077e-06
ENSMUSG00000000202	424.268	0.141922	0.19135	0.741686	0.458278	0.674394
ENSMUSG00000000204	3.03269	0.911823	1.19213	0.764869	0.44435	0.662826
ENSMUSG00000000214	234.188	-1.41543	0.253555	-5.58233	2.37319e-08	2.05454e-07
ENSMUSG00000000215	4.13048	-0.123483	0.915805	-0.134836	0.892742	0.954577
ENSMUSG00000000216	0.936083	-1.47568	1.95257	-0.755763	0.449792	1
ENSMUSG00000000223	3385.9	-0.593329	0.0598184	-9.91883	3.44778e-23	9.22281e-22
ENSMUSG00000000244	11.4479	-0.141689	0.441024	-0.321273	0.748003	0.88044
ENSMUSG00000000247	5497.32	0.920699	0.168316	5.47008	4.49843e-08	3.77699e-07
ENSMUSG00000000248	0.106119	-0.582673	3.53381	-0.164885	0.869034	1
ENSMUSG00000000253	236.35	-0.417651	0.139351	-2.99712	0.00272548	0.010517
ENSMUSG00000000263	18.962	-4.08981	0.705436	-5.79757	6.72815e-09	6.20658e-08
ENSMUSG00000000266	659.466	-1.11673	0.115872	-9.63756	5.5493e-22	1.37374e-20
ENSMUSG00000000275	323.709	0.0328355	0.15762	0.208321	0.834978	0.927222
ENSMUSG00000000276	1577.04	-0.219716	0.103678	-2.11922	0.0340722	0.0954935
ENSMUSG00000000278	677.229	0.458161	0.0846506	5.41238	6.21935e-08	5.12389e-07
ENSMUSG00000000282	2129.38	-0.178757	0.137072	-1.30411	0.192197	0.376611
ENSMUSG00000000290	21.4277	-0.0844812	0.332096	-0.254388	0.799196	0.906654
ENSMUSG00000000295	430.185	0.220209	0.0966262	2.27898	0.0226685	0.0675774
ENSMUSG00000000296	157.657	-0.872608	0.151566	-5.75728	8.54801e-09	7.79099e-08
ENSMUSG00000000301	56.629	0.18496	0.229769	0.804982	0.42083	0.641072
ENSMUSG00000000303	201.183	-1.49921	0.328316	-4.56638	4.96231e-06	3.18355e-05
ENSMUSG00000000305	3963.51	0.0560824	0.0740827	0.757024	0.449035	0.666513
ENSMUSG00000000308	471.212	-1.31623	0.13334	-9.87123	5.54776e-23	1.45841e-21
ENSMUSG00000000317	314.949	0.273233	0.116469	2.34597	0.0189778	0.0578948
ENSMUSG00000000318	19.7897	-1.10891	0.422344	-2.62559	0.00864978	0.0291979
ENSMUSG00000000320	29.0385	-0.607613	0.426343	-1.42517	0.154107	0.319414
ENSMUSG00000000325	5226	-0.280509	0.115084	-2.43742	0.0147923	0.0467283
ENSMUSG00000000326	916.826	-0.122687	0.0822255	-1.49209	0.135677	0.290853
ENSMUSG00000000339	1366.82	-0.0604908	0.0597294	-1.01275	0.311181	0.527502
ENSMUSG00000000340	695.048	0.47301	0.0888604	5.32306	1.02035e-07	8.13201e-07
ENSMUSG00000000346	3302.87	0.508324	0.0556088	9.14108	6.18326e-20	1.38623e-18
ENSMUSG00000000355	1214.95	-0.23732	0.106955	-2.21887	0.0264953	0.0773037
ENSMUSG00000000359	9.54185	0.128291	0.524469	0.24461	0.806758	0.910783
ENSMUSG00000000365	14.7465	-0.439931	0.588236	-0.747882	0.454532	0.671055
ENSMUSG00000000374	3179.81	-0.0471181	0.0505216	-0.932633	0.351009	0.571961
ENSMUSG00000000378	973.143	0.0717946	0.0873077	0.822317	0.410896	0.631627
ENSMUSG00000000381	0	NA	NA	NA	NA	1
ENSMUSG00000000384	1347.13	0.114854	0.0747639	1.53622	0.124485	0.271995
ENSMUSG00000000385	2.85906	-0.395741	1.00919	-0.392138	0.694956	0.847152
ENSMUSG00000000386	3.73871	-1.91973	0.860225	-2.23166	0.0256375	0.0750884
ENSMUSG00000000392	31.3669	-0.594412	0.298387	-1.99209	0.0463616	0.123469
ENSMUSG00000000394	27.0042	1.39412	0.327531	4.25644	2.07706e-05	0.000120862
ENSMUSG00000000399	1690.89	0.145936	0.0660482	2.20954	0.0271374	0.0788749
ENSMUSG00000000402	60.6124	-0.385445	0.20361	-1.89306	0.0583503	0.149242
ENSMUSG00000000409	154.819	0.141812	0.178386	0.794976	0.426628	0.646327
ENSMUSG00000000411	3.02642	0.419759	1.02096	0.411141	0.680969	0.838748
ENSMUSG00000000416	3396.28	0.702784	0.0627339	11.2026	3.95827e-29	1.41568e-27
ENSMUSG00000000420	2451.26	0.228687	0.0760621	3.00658	0.00264202	0.0102352
ENSMUSG00000000435	0.260564	0.138666	3.53381	0.0392396	0.968699	1
ENSMUSG00000000439	1103.89	0.178531	0.0737811	2.41974	0.0155315	0.0487245
ENSMUSG00000000440	8.06799	-0.485175	0.647188	-0.749667	0.453455	0.670078
ENSMUSG00000000441	3580.05	0.117396	0.0613006	1.91508	0.0554824	0.143365
ENSMUSG00000000486	395.038	0.595018	0.120964	4.91898	8.69948e-07	6.19198e-06
ENSMUSG00000000489	339.488	-0.0869739	0.103112	-0.843491	0.398954	0.621011
ENSMUSG00000000530	373.725	-0.0867307	0.0884661	-0.980384	0.326896	0.545473
ENSMUSG00000000531	187.938	0.0799048	0.198107	0.403341	0.686697	0.842398
ENSMUSG00000000532	4178.48	-0.0720568	0.0673995	-1.0691	0.285024	0.49707
ENSMUSG00000000538	3459.05	-0.468511	0.0703488	-6.65982	2.74161e-11	3.25349e-10
ENSMUSG00000000544	1.43961	0.16239	1.38476	0.11727	0.906646	1
ENSMUSG00000000552	1641.61	-0.634366	0.145522	-4.35924	1.30517e-05	7.8286e-05
ENSMUSG00000000555	688.66	0.0423678	0.091886	0.461091	0.644734	0.81476
ENSMUSG00000000560	1484.35	0.0240916	0.113281	0.21267	0.831584	0.925245
ENSMUSG00000000561	1813.57	0.0844983	0.115569	0.731149	0.464688	0.678698
ENSMUSG00000000562	4.61487	-0.646073	0.881369	-0.733034	0.463538	0.678091
ENSMUSG00000000563	5047.31	0.0701293	0.0510539	1.37363	0.169556	0.343195
ENSMUSG00000000567	2880.47	0.496744	0.113503	4.37648	1.20613e-05	7.28689e-05
ENSMUSG00000000568	11935.6	0.379531	0.0477144	7.95423	1.80254e-15	3.00547e-14
ENSMUSG00000000579	15.8602	-0.729682	0.84027	-0.868389	0.385181	0.607904
ENSMUSG00000000581	1489.94	-0.227971	0.140277	-1.62514	0.104132	0.236464
ENSMUSG00000000594	556.471	-0.249918	0.0854557	-2.92453	0.00344977	0.0129687
ENSMUSG00000000600	3072.31	0.133303	0.134126	0.993861	0.320291	0.537708
ENSMUSG00000000605	5433.84	-0.238676	0.058111	-4.10725	4.00402e-05	0.000222013
ENSMUSG00000000606	0.106119	-0.582673	3.53381	-0.164885	0.869034	1
ENSMUSG00000000617	3.9182	-1.46369	0.883895	-1.65596	0.0977305	0.22524
ENSMUSG00000000627	839.273	-0.832268	0.0841629	-9.88877	4.65713e-23	1.23431e-21
ENSMUSG00000000628	564.909	1.46888	0.179371	8.18905	2.63296e-16	4.63796e-15
ENSMUSG00000000631	6454.42	-0.104613	0.0866841	-1.20683	0.227499	0.425947
ENSMUSG00000000632	10280.1	0.760841	0.14049	5.41563	6.1072e-08	5.03951e-07
ENSMUSG00000000673	14.083	-0.160734	0.409454	-0.392556	0.694647	0.84699
ENSMUSG00000000682	7.35811	-0.515021	0.604509	-0.851966	0.394233	0.61659
ENSMUSG00000000686	20.3005	0.220745	0.34301	0.643553	0.519865	0.724053
ENSMUSG00000000690	0.609703	-1.58372	1.86848	-0.847599	0.396661	1
ENSMUSG00000000693	280.651	-0.122491	0.131788	-0.929452	0.352655	0.57393
ENSMUSG00000000701	0.106119	-0.582673	3.53381	-0.164885	0.869034	1
ENSMUSG00000000706	3.76878	0.520893	0.74621	0.698052	0.485145	0.69609
ENSMUSG00000000708	1021.45	0.267482	0.0900171	2.97146	0.00296387	0.011348
ENSMUSG00000000711	2907.13	0.0370078	0.0613275	0.603446	0.546212	0.743994
ENSMUSG00000000724	3.37426	0.0173459	0.802561	0.0216131	0.982757	0.993271
ENSMUSG00000000730	0.842061	-1.11504	1.93656	-0.575782	0.564762	1
ENSMUSG00000000731	9.44817	-0.139902	0.585263	-0.239041	0.811074	0.913505
ENSMUSG00000000732	40.292	0.675973	0.280795	2.40735	0.0160686	0.0501552
ENSMUSG00000000738	1762.91	-0.0383334	0.0575758	-0.66579	0.505545	0.713384
ENSMUSG00000000739	15.04	-0.117216	0.442848	-0.264686	0.791251	0.902103
ENSMUSG00000000740	575.152	0.161019	0.108255	1.4874	0.13691	0.292795
ENSMUSG00000000743	2694.8	-0.0610558	0.0647721	-0.942625	0.345873	0.566156
ENSMUSG00000000751	2531.89	0.918385	0.0819315	11.2092	3.67537e-29	1.31632e-27
ENSMUSG00000000753	377.856	-0.607121	0.102174	-5.94204	2.81502e-09	2.72494e-08
ENSMUSG00000000759	2529.49	0.258663	0.0597134	4.33175	1.47929e-05	8.79963e-05
ENSMUSG00000000766	23.0083	1.52692	0.477299	3.19908	0.00137867	0.00573483
ENSMUSG00000000776	956.474	0.159133	0.118674	1.34093	0.179944	0.358697
ENSMUSG00000000782	370.288	-0.0283824	0.105351	-0.269407	0.787616	0.900734
ENSMUSG00000000787	17196.7	0.380039	0.10825	3.51076	0.000446829	0.00205875
ENSMUSG00000000791	3.41982	0.454857	0.894915	0.508268	0.611266	0.79244
ENSMUSG00000000792	48.4948	-0.243967	0.226934	-1.07506	0.282349	0.494195
ENSMUSG00000000794	944.507	0.367755	0.10711	3.43342	0.000596027	0.00268456
ENSMUSG00000000804	3706.44	-0.276865	0.0905932	-3.05614	0.00224209	0.0088447
ENSMUSG00000000805	67.5387	-0.840618	0.288313	-2.91564	0.00354958	0.0132957
ENSMUSG00000000811	409.494	-0.590178	0.117555	-5.02045	5.15517e-07	3.79119e-06
ENSMUSG00000000817	20.293	-1.12906	0.469618	-2.40421	0.0162075	0.0505088
ENSMUSG00000000823	7098.48	-0.101565	0.0879545	-1.15474	0.248196	0.451881
ENSMUSG00000000826	8938.67	-0.343243	0.0660733	-5.19488	2.04854e-07	1.57637e-06
ENSMUSG00000000827	1922.42	0.396674	0.063218	6.27469	3.50322e-10	3.7469e-09
ENSMUSG00000000838	3702.75	0.475327	0.0808603	5.87837	4.1432e-09	3.92407e-08
ENSMUSG00000000861	8459.61	1.01606	0.0638935	15.9024	6.0961e-57	6.68866e-55
ENSMUSG00000000869	395.895	-0.461669	0.123218	-3.74676	0.00017913	0.000889091
ENSMUSG00000000876	361.977	-0.228727	0.0992065	-2.30556	0.0211351	0.0635772
ENSMUSG00000000881	3813.52	0.000144942	0.0461609	0.00313993	0.997495	0.999319
ENSMUSG00000000884	196.203	0.02584	0.115456	0.223809	0.822906	0.920878
ENSMUSG00000000889	64.0616	-6.93314	0.795291	-8.71775	2.83783e-18	5.74532e-17
ENSMUSG00000000901	589.395	0.065136	0.121805	0.534758	0.592817	0.779604
ENSMUSG00000000902	4460.76	0.144914	0.0512744	2.82624	0.00470976	0.0170661
ENSMUSG00000000903	4.14995	-1.5635	0.810032	-1.93017	0.0535855	0.139074
ENSMUSG00000000915	1848.17	-0.0026739	0.103294	-0.0258864	0.979348	0.992145
ENSMUSG00000000916	627.064	0.163808	0.0873544	1.87521	0.0607641	0.154201
ENSMUSG00000000934	266.152	-0.28414	0.10082	-2.81829	0.00482804	0.017424
ENSMUSG00000000938	4.17491	0.804056	1.37944	0.582885	0.559971	0.755156
ENSMUSG00000000942	4.72152	-4.85464	1.58789	-3.05729	0.00223351	0.00881491
ENSMUSG00000000948	955.914	-0.00126902	0.126683	-0.0100173	0.992008	0.997411
ENSMUSG00000000957	2835.01	0.131756	0.125285	1.05164	0.292963	0.506001
ENSMUSG00000000958	193.028	-0.0853812	0.118857	-0.718355	0.472538	0.685401
ENSMUSG00000000959	2236.19	0.121212	0.058597	2.06857	0.0385861	0.105921
ENSMUSG00000000976	2503.04	0.0650229	0.0583333	1.11468	0.264988	0.473115
ENSMUSG00000000982	7.95816	0.548413	0.580186	0.945236	0.344538	0.564794
ENSMUSG00000000983	0.117216	0.86	3.53381	0.243363	0.807724	1
ENSMUSG00000001014	0	NA	NA	NA	NA	1
ENSMUSG00000001016	6806.49	0.371593	0.0798556	4.65332	3.26633e-06	2.15376e-05
ENSMUSG00000001017	7088.87	0.293209	0.059464	4.93087	8.18655e-07	5.85587e-06
ENSMUSG00000001018	1028.58	-0.152294	0.0856199	-1.77872	0.0752858	0.182776
ENSMUSG00000001020	1.47646	-0.359357	1.24255	-0.289209	0.772422	1
ENSMUSG00000001021	2.33552	-1.81164	1.23343	-1.46878	0.141893	0.300079
ENSMUSG00000001023	0	NA	NA	NA	NA	1
ENSMUSG00000001025	90.0444	-0.242329	0.246368	-0.983606	0.325309	0.543661
ENSMUSG00000001027	2.49296	-0.856629	1.05297	-0.813536	0.415911	0.636414
ENSMUSG00000001029	109.226	0.0429495	0.156367	0.274671	0.783569	0.898244
ENSMUSG00000001034	3075.36	0.222331	0.113186	1.9643	0.0494958	0.130275
ENSMUSG00000001036	2726.11	-0.171909	0.0507853	-3.38502	0.000711739	0.00315524
ENSMUSG00000001039	480.349	0.224467	0.102836	2.18278	0.0290521	0.0835769
ENSMUSG00000001052	3737.35	-0.104491	0.0519075	-2.01302	0.0441128	0.118369
ENSMUSG00000001053	247.211	-0.261374	0.129534	-2.0178	0.0436124	0.117281
ENSMUSG00000001054	1127.28	-0.22643	0.0760763	-2.97635	0.002917	0.01119
ENSMUSG00000001056	681.032	0.322824	0.102494	3.1497	0.00163439	0.00666786
ENSMUSG00000001062	2067	-0.392704	0.0916961	-4.28267	1.84665e-05	0.000108208
ENSMUSG00000001065	1107.05	-0.0298421	0.112703	-0.264785	0.791175	0.902103
ENSMUSG00000001076	331.965	-6.91501	0.356958	-19.3721	1.32854e-83	3.21507e-81
ENSMUSG00000001082	962.737	0.220684	0.12659	1.7433	0.0812812	0.194465
ENSMUSG00000001089	2332.37	0.576919	0.0793892	7.26698	3.67625e-13	5.1848e-12
ENSMUSG00000001095	0.24313	0.138666	3.53381	0.0392396	0.968699	1
ENSMUSG00000001098	1495.72	0.00617793	0.0993735	0.0621688	0.950428	0.980181
ENSMUSG00000001100	2779.7	0.147414	0.068874	2.14035	0.0323266	0.0914826
ENSMUSG00000001103	5.11303	0.43387	0.726776	0.596978	0.550522	0.74752
ENSMUSG00000001105	1025.92	-0.199641	0.0812574	-2.45689	0.0140145	0.0445729
ENSMUSG00000001119	1129.08	-1.01132	0.0923257	-10.9538	6.36823e-28	2.14155e-26
ENSMUSG00000001120	1148.84	-0.250365	0.0978822	-2.55782	0.0105332	0.0346921
ENSMUSG00000001123	123.537	-0.305763	0.155836	-1.96208	0.0497532	0.130753
ENSMUSG00000001127	4707.86	-0.206822	0.058189	-3.55431	0.000378977	0.00176847
ENSMUSG00000001128	763.529	-0.130734	0.0902651	-1.44833	0.147523	0.309084
ENSMUSG00000001131	52.3184	-0.338688	0.232662	-1.45571	0.145474	0.305759
ENSMUSG00000001134	216.084	0.658562	0.12266	5.369	7.91764e-08	6.41487e-07
ENSMUSG00000001138	1370.6	0.0886827	0.0713781	1.24244	0.214076	0.40791
ENSMUSG00000001143	1766.52	-0.0831305	0.0592636	-1.40273	0.160699	0.329516
ENSMUSG00000001150	3294.28	0.123708	0.0558249	2.216	0.0266912	0.0777963
ENSMUSG00000001151	2173.86	0.715158	0.0868707	8.23245	1.8343e-16	3.25548e-15
ENSMUSG00000001155	0.868841	-2.18831	1.73359	-1.2623	0.206841	1
ENSMUSG00000001156	1509.18	-0.275013	0.0659745	-4.16847	3.06652e-05	0.000173221
ENSMUSG00000001157	1819.5	0.277142	0.0812986	3.40895	0.000652144	0.002914
ENSMUSG00000001158	1040.62	0.293043	0.0957965	3.05901	0.00222069	0.00877181
ENSMUSG00000001166	14.1107	-0.182076	0.403318	-0.451444	0.651669	0.819965
ENSMUSG00000001168	0	NA	NA	NA	NA	1
ENSMUSG00000001173	2653.67	-0.164043	0.0619108	-2.64967	0.00805716	0.0274444
ENSMUSG00000001175	19356.8	-0.231774	0.0637312	-3.63675	0.000276104	0.00132495
ENSMUSG00000001211	3122.9	0.0240285	0.0589175	0.407833	0.683396	0.840273
ENSMUSG00000001225	2.92775	1.30916	0.926055	1.41369	0.157452	0.324529
ENSMUSG00000001227	1299.63	-0.675136	0.177447	-3.80473	0.000141959	0.00071529
ENSMUSG00000001228	3403.21	1.5013	0.0636495	23.587	5.23971e-123	2.71354e-120
ENSMUSG00000001229	2538.77	0.0377969	0.0842101	0.44884	0.653547	0.821152
ENSMUSG00000001240	609.927	-0.221809	0.120824	-1.8358	0.0663865	0.165352
ENSMUSG00000001247	250.561	0.576007	0.143599	4.01122	6.04048e-05	0.000324305
ENSMUSG00000001248	10429.6	-0.138838	0.100158	-1.38619	0.165689	0.33716
ENSMUSG00000001249	11.2404	-0.950167	0.518566	-1.8323	0.0669073	0.166298
ENSMUSG00000001260	170.486	-0.338295	0.191782	-1.76396	0.0777394	0.187516
ENSMUSG00000001270	10722.4	0.124941	0.123851	1.0088	0.313069	0.529809
ENSMUSG00000001280	3932.94	0.538644	0.0787716	6.83805	8.02802e-12	1.01157e-10
ENSMUSG00000001281	9.49046	-0.234777	0.602087	-0.389938	0.696582	0.84827
ENSMUSG00000001285	1172.66	0.318198	0.0735833	4.32432	1.53e-05	9.08457e-05
ENSMUSG00000001288	303.226	0.335793	0.106447	3.15457	0.00160734	0.00657414
ENSMUSG00000001289	2756.11	0.16765	0.107588	1.55826	0.119172	0.262781
ENSMUSG00000001300	5459.57	1.96267	0.0972626	20.179	1.49634e-90	4.31364e-88
ENSMUSG00000001305	561.585	0.501651	0.0850583	5.89773	3.6854e-09	3.5175e-08
ENSMUSG00000001313	3511.62	1.01127	0.101857	9.92837	3.13351e-23	8.3995e-22
ENSMUSG00000001323	1303.03	0.0726678	0.0683454	1.06324	0.287672	0.500233
ENSMUSG00000001333	20.2078	-0.768189	0.364714	-2.10628	0.0351803	0.0981214
ENSMUSG00000001334	145.018	-1.36984	0.140504	-9.74947	1.85435e-22	4.73537e-21
ENSMUSG00000001348	15.9648	-0.19954	0.475202	-0.419906	0.674554	0.835297
ENSMUSG00000001349	7.732	-0.13204	0.588817	-0.224247	0.822565	0.920848
ENSMUSG00000001366	970.359	-0.332915	0.0732833	-4.54285	5.54986e-06	3.52831e-05
ENSMUSG00000001376	1855.25	0.0728168	0.100064	0.727704	0.466795	0.680504
ENSMUSG00000001380	2297.67	0.222408	0.0695496	3.19783	0.00138467	0.00575792
ENSMUSG00000001383	3512.36	0.456279	0.125004	3.65012	0.000262117	0.00126416
ENSMUSG00000001403	1857.91	1.56439	0.173666	9.00805	2.0975e-19	4.5374e-18
ENSMUSG00000001415	5269.02	0.0569944	0.0693437	0.821912	0.411127	0.631756
ENSMUSG00000001416	7410.58	0.417567	0.0667239	6.25813	3.89621e-10	4.15179e-09
ENSMUSG00000001418	893.983	-0.12043	0.0916152	-1.31453	0.18867	0.371591
ENSMUSG00000001419	2811.77	0.174745	0.114074	1.53186	0.125558	0.273993
ENSMUSG00000001420	28.972	0.358324	0.30114	1.18989	0.234089	0.434485
ENSMUSG00000001424	3268.79	0.0775633	0.0809823	0.957781	0.338173	0.558104
ENSMUSG00000001435	3226.57	-0.117218	0.106103	-1.10476	0.269265	0.477928
ENSMUSG00000001436	729.066	-0.12579	0.0763524	-1.64749	0.0994581	0.2282
ENSMUSG00000001440	14480.1	0.421042	0.0655463	6.42358	1.33105e-10	1.48115e-09
ENSMUSG00000001441	6808.45	-0.13885	0.094502	-1.46928	0.141758	0.299989
ENSMUSG00000001444	7.8339	-0.308527	0.589602	-0.523281	0.600779	0.78523
ENSMUSG00000001445	1227.07	0.0902714	0.110902	0.813976	0.415659	0.636266
ENSMUSG00000001467	4477.5	-0.190871	0.0591137	-3.22888	0.00124274	0.00522057
ENSMUSG00000001472	11257.4	-0.294227	0.0653021	-4.50563	6.61765e-06	4.16523e-05
ENSMUSG00000001473	499.613	-0.14045	0.0977076	-1.43746	0.150589	0.314058
ENSMUSG00000001482	1830.21	0.0248338	0.0681703	0.36429	0.715641	0.859949
ENSMUSG00000001493	11.7959	0.0251126	0.491737	0.0510692	0.95927	0.983509
ENSMUSG00000001494	10.725	-0.718728	0.518782	-1.38541	0.165926	0.337509
ENSMUSG00000001496	1042.45	6.70643	0.952936	7.03765	1.95508e-12	2.59482e-11
ENSMUSG00000001497	2.66374	-2.57087	1.41718	-1.81407	0.0696666	0.171919
ENSMUSG00000001504	1495.89	-6.84748	0.909228	-7.53109	5.03196e-14	7.63312e-13
ENSMUSG00000001506	4443.63	-0.828668	0.156628	-5.29067	1.21871e-07	9.64168e-07
ENSMUSG00000001507	892.717	-1.12096	0.109654	-10.2227	1.56928e-24	4.47522e-23
ENSMUSG00000001508	1.71821	0.113797	1.10993	0.102526	0.918339	1
ENSMUSG00000001510	8.86431	-1.94634	0.619407	-3.14226	0.00167648	0.00682454
ENSMUSG00000001517	2459.4	1.56175	0.101519	15.3838	2.10117e-53	2.03774e-51
ENSMUSG00000001518	791.89	-0.255697	0.234478	-1.09049	0.275496	0.485682
ENSMUSG00000001520	303.592	-0.579888	0.149368	-3.88227	0.000103485	0.000532518
ENSMUSG00000001521	1199.42	0.194355	0.0765489	2.53896	0.0111181	0.0363868
ENSMUSG00000001524	325.486	0.412359	0.149857	2.75168	0.00592899	0.0209049
ENSMUSG00000001525	90949.3	0.0677872	0.0602169	1.12572	0.260285	0.467393
ENSMUSG00000001542	109.065	-0.517782	0.159958	-3.23698	0.001208	0.00508867
ENSMUSG00000001552	2014.42	-0.84503	0.103602	-8.1565	3.44873e-16	6.02574e-15
ENSMUSG00000001555	707.484	-0.122539	0.115573	-1.06027	0.289022	0.50149
ENSMUSG00000001558	21.0864	0.14026	0.366202	0.383013	0.70171	0.851486
ENSMUSG00000001566	0.351809	0.837368	2.74355	0.305214	0.760203	1
ENSMUSG00000001569	1153.96	0.366922	0.097639	3.75795	0.000171312	0.000853004
ENSMUSG00000001576	4803.47	0.212687	0.0546574	3.89127	9.97193e-05	0.000514677
ENSMUSG00000001583	11.6233	-0.639316	0.475546	-1.34438	0.178824	0.357096
ENSMUSG00000001588	39.0929	-0.0873197	0.244795	-0.356706	0.721312	0.863666
ENSMUSG00000001604	20.5283	-0.530376	0.358765	-1.47834	0.139318	0.296441
ENSMUSG00000001622	0	NA	NA	NA	NA	1
ENSMUSG00000001627	1358.41	0.109739	0.0788166	1.39234	0.16382	0.334169
ENSMUSG00000001630	503.956	-0.0635646	0.111863	-0.568236	0.569875	0.762326
ENSMUSG00000001632	2333.88	0.378721	0.0753844	5.02387	5.06412e-07	3.73059e-06
ENSMUSG00000001642	372.519	0.167766	0.103247	1.62489	0.104185	0.236553
ENSMUSG00000001655	0.23472	0.138666	3.53381	0.0392396	0.968699	1
ENSMUSG00000001656	0	NA	NA	NA	NA	1
ENSMUSG00000001657	1.79963	-0.000920159	1.22921	-0.000748579	0.999403	0.999784
ENSMUSG00000001661	2.1536	2.34088	1.4099	1.66032	0.096851	0.223876
ENSMUSG00000001663	70.9418	0.135934	0.198215	0.685793	0.492844	0.70252
ENSMUSG00000001665	7.95998	0.0110233	0.563165	0.0195738	0.984383	0.993593
ENSMUSG00000001666	450.118	0.0859873	0.152725	0.563022	0.57342	0.765181
ENSMUSG00000001670	1.02183	-0.580183	1.92705	-0.301074	0.763358	1
ENSMUSG00000001672	28.5073	0.515713	0.314866	1.63788	0.101446	0.231563
ENSMUSG00000001674	804.019	0.625336	0.0977323	6.39846	1.56955e-10	1.73166e-09
ENSMUSG00000001687	1534.96	0.136218	0.0953502	1.42861	0.153117	0.318051
ENSMUSG00000001700	255.627	-0.493432	0.135664	-3.63716	0.000275658	0.00132379
ENSMUSG00000001707	1130.16	0.0220863	0.113259	0.195007	0.845388	0.932105
ENSMUSG00000001729	9732.62	0.0763726	0.0796576	0.958761	0.337679	0.557624
ENSMUSG00000001739	37.9909	-0.335758	0.355639	-0.944097	0.34512	0.565353
ENSMUSG00000001741	44.0349	-0.436975	0.233558	-1.87095	0.0613523	0.155218
ENSMUSG00000001750	421.453	-0.114447	0.123568	-0.926183	0.354351	0.576018
ENSMUSG00000001751	267.579	-0.460054	0.109025	-4.21969	2.4464e-05	0.000140428
ENSMUSG00000001755	1057.65	-0.0103654	0.0810339	-0.127914	0.898217	0.9569
ENSMUSG00000001761	2279.95	0.523303	0.106042	4.93485	8.02129e-07	5.74242e-06
ENSMUSG00000001763	205.412	-0.262562	0.178109	-1.47416	0.140438	0.298099
ENSMUSG00000001767	1412.7	0.464972	0.0873054	5.32582	1.005e-07	8.02454e-07
ENSMUSG00000001768	809.095	-0.27776	0.0800648	-3.46919	0.000522038	0.00237485
ENSMUSG00000001773	8.68423	1.21289	0.674863	1.79724	0.0722979	0.17713
ENSMUSG00000001774	3302.08	0.00209923	0.105014	0.0199901	0.984051	0.993576
ENSMUSG00000001783	3854.69	0.138494	0.075917	1.82429	0.0681086	0.168739
ENSMUSG00000001785	1706.01	0.400599	0.0575818	6.95704	3.47506e-12	4.51496e-11
ENSMUSG00000001786	1629.15	-0.390103	0.0802371	-4.86188	1.16276e-06	8.15952e-06
ENSMUSG00000001794	3539.32	-0.251289	0.0917563	-2.73866	0.00616909	0.0216483
ENSMUSG00000001802	4958.25	-0.264541	0.107547	-2.45976	0.013903	0.0442919
ENSMUSG00000001804	0	NA	NA	NA	NA	1
ENSMUSG00000001815	211.538	-10.3828	1.02778	-10.1021	5.40458e-24	1.49835e-22
ENSMUSG00000001819	6.02574	-5.97263	1.15534	-5.1696	2.34601e-07	1.79461e-06
ENSMUSG00000001823	0.128474	0.86	3.53381	0.243363	0.807724	1
ENSMUSG00000001827	206.62	0.0670439	0.565533	0.11855	0.905632	0.961011
ENSMUSG00000001829	1257.69	-0.0564906	0.0623694	-0.905741	0.365073	0.587315
ENSMUSG00000001833	7108.13	0.259587	0.0776172	3.34445	0.000824472	0.00360857
ENSMUSG00000001844	901.914	-0.0322246	0.0852469	-0.378014	0.70542	0.853399
ENSMUSG00000001847	7243.68	0.072236	0.047244	1.529	0.126265	0.275189
ENSMUSG00000001855	2609.95	0.308642	0.0784721	3.93314	8.38423e-05	0.000438677
ENSMUSG00000001864	1808.88	1.22418	0.0780307	15.6884	1.81446e-55	1.9099e-53
ENSMUSG00000001865	2.42949	2.02573	1.11534	1.81625	0.0693326	0.171225
ENSMUSG00000001870	687.147	1.88695	0.139818	13.4957	1.65684e-41	1.0567e-39
ENSMUSG00000001891	1504.35	-0.036121	0.0899907	-0.401386	0.688136	0.843059
ENSMUSG00000001901	94.8823	-1.91328	0.346637	-5.51955	3.39878e-08	2.8931e-07
ENSMUSG00000001909	1771.74	-0.00235149	0.060177	-0.0390763	0.96883	0.987633
ENSMUSG00000001910	4050.61	0.293715	0.103705	2.83222	0.00462257	0.0167854
ENSMUSG00000001911	6951.45	2.14195	0.138439	15.4722	5.34759e-54	5.32579e-52
ENSMUSG00000001918	610.05	0.31266	0.130505	2.39576	0.016586	0.0515269
ENSMUSG00000001924	25748.3	-0.0784635	0.0441126	-1.77871	0.0752873	0.182776
ENSMUSG00000001930	353.29	-0.726398	0.181208	-4.00865	6.10677e-05	0.00032766
ENSMUSG00000001942	381.301	-0.180465	0.11664	-1.5472	0.121815	0.267517
ENSMUSG00000001943	98.679	-0.124172	0.172107	-0.721479	0.470615	0.683844
ENSMUSG00000001946	624.543	-0.109663	0.0765022	-1.43347	0.151724	0.315927
ENSMUSG00000001948	131.167	0.302439	0.195684	1.54554	0.122215	0.268234
ENSMUSG00000001962	1064.82	0.344005	0.0789846	4.35534	1.32858e-05	7.95797e-05
ENSMUSG00000001964	1662.14	0.543793	0.0670535	8.10984	5.06849e-16	8.74374e-15
ENSMUSG00000001983	305.538	0.0319847	0.130614	0.24488	0.806549	0.910687
ENSMUSG00000001985	5807.03	0.826984	0.086149	9.59947	8.03601e-22	1.97236e-20
ENSMUSG00000001986	1383.59	-0.391117	0.0803308	-4.86883	1.12262e-06	7.89279e-06
ENSMUSG00000001988	122.416	-0.486404	0.187116	-2.59948	0.00933654	0.0312554
ENSMUSG00000001995	4152.49	0.0863594	0.0813749	1.06125	0.288575	0.501084
ENSMUSG00000001998	1026.61	0.0530967	0.129233	0.410862	0.681174	0.838961
ENSMUSG00000001999	282.451	-0.00775786	0.116211	-0.0667568	0.946775	0.978792
ENSMUSG00000002006	4780.22	-0.337738	0.0657859	-5.13389	2.83816e-07	2.15328e-06
ENSMUSG00000002007	14.2735	-0.46084	0.412475	-1.11726	0.263885	0.471797
ENSMUSG00000002010	2700.95	0.122894	0.0893294	1.37574	0.168902	0.342112
ENSMUSG00000002012	1503.6	-0.639345	0.111226	-5.74818	9.02087e-09	8.19026e-08
ENSMUSG00000002014	961.534	0.0874364	0.0656776	1.3313	0.183091	0.363013
ENSMUSG00000002015	999.216	-0.0268567	0.106886	-0.251266	0.801609	0.9078
ENSMUSG00000002017	1952.55	0.363395	0.065949	5.51024	3.58337e-08	3.04222e-07
ENSMUSG00000002020	14.1261	0.00976833	0.458856	0.0212884	0.983016	0.993271
ENSMUSG00000002028	11390.9	0.422463	0.129282	3.26776	0.00108402	0.00461518
ENSMUSG00000002031	2725.35	0.12608	0.071864	1.75442	0.0793589	0.190712
ENSMUSG00000002032	299.712	-0.865253	0.116788	-7.40873	1.27515e-13	1.85603e-12
ENSMUSG00000002033	0.251866	1.5562	3.53063	0.440773	0.659377	1
ENSMUSG00000002043	185.664	0.0849771	0.155481	0.546544	0.584692	0.773199
ENSMUSG00000002052	6626.8	0.133991	0.0720872	1.85874	0.0630647	0.158697
ENSMUSG00000002055	1978.29	1.78163	0.0873818	20.389	2.09307e-92	6.45215e-90
ENSMUSG00000002057	0.106119	-0.582673	3.53381	-0.164885	0.869034	1
ENSMUSG00000002058	1383.71	0.0404003	0.0839461	0.481265	0.630328	0.805099
ENSMUSG00000002059	747.153	0.0883968	0.100806	0.876902	0.38054	0.603153
ENSMUSG00000002064	869.025	-0.194006	0.0715609	-2.71106	0.00670693	0.0233238
ENSMUSG00000002068	388.276	1.04564	0.101839	10.2676	9.86124e-25	2.84034e-23
ENSMUSG00000002076	9.82865	-0.0186511	0.511122	-0.0364906	0.970891	0.988451
ENSMUSG00000002083	308.421	-0.811514	0.289964	-2.79867	0.00513138	0.018355
ENSMUSG00000002100	4.19286	-0.532102	0.802268	-0.663247	0.507172	0.714628
ENSMUSG00000002102	3545.09	0.288165	0.0648399	4.44425	8.82009e-06	5.44818e-05
ENSMUSG00000002103	2652.92	-0.143262	0.0524419	-2.73183	0.00629845	0.0220395
ENSMUSG00000002104	13.3098	0.240629	0.509775	0.472029	0.636906	0.809664
ENSMUSG00000002105	758.612	-0.408047	0.124398	-3.28018	0.0010374	0.00443862
ENSMUSG00000002107	17004.3	1.00705	0.101703	9.90182	4.08758e-23	1.09005e-21
ENSMUSG00000002108	54.2896	-0.307335	0.21646	-1.41982	0.15566	0.321963
ENSMUSG00000002109	287.443	-0.337258	0.13105	-2.57351	0.0100673	0.0333566
ENSMUSG00000002111	63.2266	-0.454636	0.267556	-1.69922	0.0892783	0.20997
ENSMUSG00000002129	5490.9	0.217349	0.0589999	3.68389	0.000229701	0.00111928
ENSMUSG00000002147	280.163	-0.406726	0.115448	-3.52304	0.000426635	0.00197097
ENSMUSG00000002190	300.747	-1.03149	0.12378	-8.33326	7.86455e-17	1.43817e-15
ENSMUSG00000002204	49.8116	-0.378004	0.240195	-1.57374	0.115548	0.256275
ENSMUSG00000002205	905.831	0.403671	0.0788646	5.11853	3.0792e-07	2.32593e-06
ENSMUSG00000002210	1002.32	-0.147066	0.105496	-1.39404	0.163305	0.333356
ENSMUSG00000002221	2050.27	0.35595	0.0718779	4.95215	7.3397e-07	5.27928e-06
ENSMUSG00000002222	2970.8	0.163257	0.102291	1.596	0.110488	0.247691
ENSMUSG00000002227	457.947	0.205444	0.11548	1.77904	0.0752331	0.182696
ENSMUSG00000002228	26.313	1.38098	0.345821	3.99332	6.51547e-05	0.000347397
ENSMUSG00000002233	672.167	0.173184	0.111774	1.54941	0.121284	0.266621
ENSMUSG00000002240	0	NA	NA	NA	NA	1
ENSMUSG00000002249	745.77	0.444322	0.157795	2.81581	0.00486544	0.0175281
ENSMUSG00000002250	664.216	-0.038172	0.115543	-0.330371	0.74112	0.876466
ENSMUSG00000002257	85.8372	-0.188306	0.211316	-0.891113	0.372868	0.59555
ENSMUSG00000002265	13182.6	-0.0723561	0.089687	-0.806763	0.419803	0.640213
ENSMUSG00000002266	869.414	0.0263343	0.170652	0.154316	0.877361	0.947547
ENSMUSG00000002274	931.079	0.1661	0.181215	0.916592	0.359357	0.581102
ENSMUSG00000002279	475.308	-0.163397	0.107126	-1.52528	0.127188	0.276572
ENSMUSG00000002280	668.616	0.149138	0.0880061	1.69463	0.0901462	0.211528
ENSMUSG00000002289	277.005	-0.55136	0.135109	-4.08085	4.48716e-05	0.000246794
ENSMUSG00000002297	1433.76	1.14606	0.0967723	11.8429	2.34331e-32	9.77097e-31
ENSMUSG00000002307	1431.56	0.237739	0.0768873	3.09205	0.0019878	0.00794815
ENSMUSG00000002308	428.274	0.114875	0.089321	1.28609	0.198411	0.385199
ENSMUSG00000002319	1252.77	-0.174422	0.0789435	-2.20946	0.0271429	0.078882
ENSMUSG00000002320	1018.62	0.272742	0.0710149	3.84063	0.00012272	0.000624054
ENSMUSG00000002324	18.8914	-0.17831	0.446422	-0.399421	0.689583	0.843985
ENSMUSG00000002325	1100.45	-0.206652	0.327378	-0.631234	0.527887	0.730188
ENSMUSG00000002326	306.679	0.330998	0.0982668	3.36837	0.000756153	0.00333387
ENSMUSG00000002329	1014.24	0.00958865	0.0742569	0.129128	0.897256	0.956651
ENSMUSG00000002332	1024.96	0.164388	0.197104	0.834017	0.404271	0.626014
ENSMUSG00000002341	12318.8	-0.146639	0.128179	-1.14401	0.252618	0.45756
ENSMUSG00000002342	922.175	0.377579	0.109156	3.45907	0.000542045	0.00245895
ENSMUSG00000002343	1151.24	-0.298762	0.0769854	-3.88076	0.00010413	0.000535306
ENSMUSG00000002345	645.912	0.0135586	0.108104	0.125422	0.900189	0.957873
ENSMUSG00000002346	688.041	-0.440865	0.128322	-3.43561	0.00059122	0.00266662
ENSMUSG00000002365	455.004	0.190089	0.107547	1.76749	0.0771458	0.186345
ENSMUSG00000002372	3613.97	0.174	0.0727169	2.39284	0.0167187	0.051846
ENSMUSG00000002379	1057.61	-0.00104965	0.0956669	-0.0109719	0.991246	0.997021
ENSMUSG00000002384	15.0122	-1.23226	0.435135	-2.83191	0.00462714	0.016795
ENSMUSG00000002393	304.703	-0.73653	0.568629	-1.29527	0.195226	0.381062
ENSMUSG00000002395	1112.67	-0.0837099	0.083146	-1.00678	0.314039	0.530733
ENSMUSG00000002396	451.796	-0.266252	0.110338	-2.41306	0.0158194	0.0495257
ENSMUSG00000002409	1343.87	-0.020594	0.158998	-0.129524	0.896943	0.956651
ENSMUSG00000002413	3720.34	0.0789597	0.0807226	0.978161	0.327995	0.546812
ENSMUSG00000002416	981.684	-0.224955	0.0839795	-2.67869	0.00739118	0.0253964
ENSMUSG00000002428	1409.44	0.321404	0.0855306	3.75777	0.000171436	0.000853195
ENSMUSG00000002455	2930.02	0.214483	0.0516298	4.15424	3.26367e-05	0.000183437
ENSMUSG00000002458	619.209	0.284629	0.0874108	3.25623	0.00112904	0.00478744
ENSMUSG00000002459	376.865	0.823237	0.145476	5.65894	1.5231e-08	1.34835e-07
ENSMUSG00000002475	70.3146	-0.205919	0.250612	-0.821667	0.411266	0.631772
ENSMUSG00000002477	2500.65	0.593993	0.11788	5.03894	4.68108e-07	3.45924e-06
ENSMUSG00000002486	1051.18	0.117977	0.11557	1.02083	0.307334	0.523112
ENSMUSG00000002489	2169.82	0.00191108	0.0769551	0.0248337	0.980188	0.992512
ENSMUSG00000002496	5354.75	0.0244583	0.0642967	0.380397	0.703651	0.852623
ENSMUSG00000002500	3.44501	-1.19992	1.03118	-1.16364	0.244572	0.447589
ENSMUSG00000002504	547.717	-0.61193	0.0880624	-6.94881	3.68371e-12	4.77169e-11
ENSMUSG00000002524	4959.25	-0.0485156	0.0588529	-0.824354	0.409739	0.630783
ENSMUSG00000002546	3121.94	-0.16611	0.103514	-1.60471	0.108557	0.24422
ENSMUSG00000002550	893.03	0.0923656	0.0920451	1.00348	0.315628	0.532056
ENSMUSG00000002565	1.15147	-0.235454	1.4985	-0.157126	0.875145	1
ENSMUSG00000002578	1741.39	-0.767557	0.108982	-7.04297	1.88191e-12	2.50155e-11
ENSMUSG00000002580	875.376	0.042252	0.094824	0.445583	0.655898	0.822969
ENSMUSG00000002588	3.08368	0.259276	0.885129	0.292925	0.76958	0.890705
ENSMUSG00000002602	1172.1	0.235961	0.0800337	2.94827	0.00319562	0.012133
ENSMUSG00000002603	178.075	-0.393797	0.184407	-2.13548	0.0327217	0.0923885
ENSMUSG00000002608	2206.25	0.0164528	0.10048	0.163742	0.869934	0.944082
ENSMUSG00000002617	1318.97	0.196495	0.125104	1.57065	0.116265	0.257599
ENSMUSG00000002625	4570.24	-0.278489	0.123917	-2.24738	0.0246158	0.0724867
ENSMUSG00000002633	159.453	-0.677344	0.151972	-4.45702	8.31057e-06	5.16176e-05
ENSMUSG00000002635	488.838	0.184192	0.094779	1.94339	0.0519692	0.135586
ENSMUSG00000002658	2155.68	0.338012	0.120645	2.80171	0.00508329	0.0182107
ENSMUSG00000002660	1004.04	0.0644275	0.0964034	0.668311	0.503935	0.712237
ENSMUSG00000002661	190.172	-0.0573962	0.19885	-0.288641	0.772856	0.89227
ENSMUSG00000002664	15.2949	-0.0933432	0.373253	-0.25008	0.802525	0.908243
ENSMUSG00000002668	297.643	0.488342	0.285256	1.71194	0.0869069	0.205438
ENSMUSG00000002679	616.791	0.376408	0.0925077	4.06894	4.72281e-05	0.000258875
ENSMUSG00000002688	418.761	2.12797	0.114774	18.5405	9.72937e-77	2.03171e-74
ENSMUSG00000002699	90.0464	-0.155765	0.172333	-0.903858	0.366071	0.58833
ENSMUSG00000002718	4636.1	0.381258	0.0865268	4.40624	1.0518e-05	6.40531e-05
ENSMUSG00000002728	855.578	0.228788	0.0829214	2.7591	0.00579611	0.0204754
ENSMUSG00000002731	1667.2	-0.182748	0.0730301	-2.50237	0.0123365	0.0398854
ENSMUSG00000002732	131.71	-0.094185	0.14764	-0.637936	0.523516	0.72682
ENSMUSG00000002733	838.814	0.47125	0.0793267	5.94062	2.83947e-09	2.74656e-08
ENSMUSG00000002741	4633	0.0560713	0.0634277	0.884018	0.376686	0.599319
ENSMUSG00000002748	10488	0.526477	0.0607856	8.66121	4.66778e-18	9.27609e-17
ENSMUSG00000002763	1138.37	-0.173193	0.118908	-1.45653	0.145247	0.305427
ENSMUSG00000002767	609.992	0.413965	0.114409	3.61829	0.000296552	0.00141131
ENSMUSG00000002768	1561.9	-0.112442	0.144253	-0.779481	0.435696	0.655202
ENSMUSG00000002769	48.5959	-0.334183	0.260563	-1.28254	0.199652	0.387047
ENSMUSG00000002771	1098.09	-1.9719	0.150501	-13.1022	3.1979e-39	1.80014e-37
ENSMUSG00000002778	2577.24	-0.0879788	0.0684577	-1.28516	0.198738	0.385679
ENSMUSG00000002781	310.696	-0.105329	0.126541	-0.832372	0.405199	0.626888
ENSMUSG00000002791	3.65164	-0.547344	0.832571	-0.657415	0.510914	0.71742
ENSMUSG00000002797	125.762	-0.0324554	0.147557	-0.219951	0.825909	0.922013
ENSMUSG00000002799	1699.23	-1.0206	0.137444	-7.42557	1.12295e-13	1.64467e-12
ENSMUSG00000002803	809.108	-0.229231	0.0891437	-2.57148	0.0101266	0.0335188
ENSMUSG00000002804	242	0.171114	0.153448	1.11512	0.264797	0.472938
ENSMUSG00000002808	464.929	0.580954	0.106869	5.43612	5.44526e-08	4.51632e-07
ENSMUSG00000002812	3371.65	0.0917865	0.0805195	1.13993	0.254316	0.459842
ENSMUSG00000002814	681.816	0.554125	0.09408	5.88993	3.86349e-09	3.67934e-08
ENSMUSG00000002820	935.965	0.200845	0.0795292	2.52543	0.0115557	0.0376762
ENSMUSG00000002825	712.591	-0.0603344	0.0830368	-0.726598	0.467472	0.680959
ENSMUSG00000002831	42.6178	-0.757969	0.373281	-2.03056	0.0422997	0.114464
ENSMUSG00000002833	3901.03	0.245288	0.116592	2.10381	0.0353951	0.0986353
ENSMUSG00000002835	1268.67	1.41832	0.101736	13.9412	3.56136e-44	2.49913e-42
ENSMUSG00000002844	2496.78	-0.169971	0.0776697	-2.18839	0.0286414	0.0825789
ENSMUSG00000002845	894.608	0.008997	0.0693971	0.129645	0.896847	0.956647
ENSMUSG00000002846	897.953	0.172121	0.0759533	2.26614	0.0234429	0.0695657
ENSMUSG00000002847	10.5136	0.116865	0.569033	0.205375	0.837279	0.928342
ENSMUSG00000002870	3090.48	1.44237	0.085427	16.8843	5.8749e-64	8.04893e-62
ENSMUSG00000002871	799.258	-0.386696	0.0827143	-4.67508	2.93846e-06	1.95148e-05
ENSMUSG00000002881	827.558	0.734368	0.1211	6.06415	1.32651e-09	1.3298e-08
ENSMUSG00000002885	511.102	-0.246336	0.0903864	-2.72536	0.00642308	0.0224422
ENSMUSG00000002897	412.568	0.00455556	0.132576	0.0343618	0.972589	0.989245
ENSMUSG00000002900	2791.42	0.0277353	0.0772868	0.358862	0.719698	0.862932
ENSMUSG00000002908	1037.68	-0.0969689	0.152371	-0.6364	0.524516	0.727782
ENSMUSG00000002910	289.972	-0.220142	0.108352	-2.03173	0.0421811	0.114191
ENSMUSG00000002930	134.717	-1.81963	0.209829	-8.67197	4.24691e-18	8.47876e-17
ENSMUSG00000002944	128.202	-1.94254	0.204363	-9.50534	1.99386e-21	4.81165e-20
ENSMUSG00000002948	2319.55	-0.150277	0.126898	-1.18424	0.236319	0.437464
ENSMUSG00000002949	1819.31	0.048326	0.0732571	0.659677	0.509461	0.716215
ENSMUSG00000002957	5155.81	-0.132798	0.0813111	-1.6332	0.102426	0.233285
ENSMUSG00000002963	771.817	-0.0498606	0.0928456	-0.537026	0.591249	0.778412
ENSMUSG00000002968	4561.52	0.0970119	0.143388	0.676567	0.498681	0.707592
ENSMUSG00000002980	239.168	-0.468053	0.170259	-2.74907	0.00597653	0.0210524
ENSMUSG00000002981	3354.74	-0.421926	0.0808115	-5.22112	1.77847e-07	1.37756e-06
ENSMUSG00000002983	82.9684	-0.524708	0.199456	-2.6307	0.00852091	0.0288268
ENSMUSG00000002984	1467.57	0.0938836	0.094545	0.993005	0.320708	0.538164
ENSMUSG00000002985	2082.78	-0.606039	0.119214	-5.0836	3.70346e-07	2.7684e-06
ENSMUSG00000002992	0.117216	0.86	3.53381	0.243363	0.807724	1
ENSMUSG00000002996	1661.77	0.464191	0.0734848	6.31684	2.66972e-10	2.88642e-09
ENSMUSG00000002997	4864.22	-0.321174	0.0952315	-3.37256	0.000744725	0.00328999
ENSMUSG00000003031	4605.32	0.748695	0.10038	7.45859	8.74539e-14	1.30145e-12
ENSMUSG00000003032	142.21	-0.182568	0.165581	-1.10259	0.270206	0.479194
ENSMUSG00000003033	4878.91	-0.105887	0.0876554	-1.20799	0.227052	0.425265
ENSMUSG00000003037	2310	0.295361	0.0955414	3.09144	0.00199185	0.00796187
ENSMUSG00000003038	567.616	0.808584	0.12067	6.70078	2.07306e-11	2.50022e-10
ENSMUSG00000003039	4128.02	0.146058	0.0684007	2.13534	0.0327336	0.0924121
ENSMUSG00000003051	6.43865	1.0598	0.698516	1.51721	0.129213	0.279799
ENSMUSG00000003053	0	NA	NA	NA	NA	1
ENSMUSG00000003062	1275.63	-0.125315	0.160676	-0.779921	0.435437	0.655002
ENSMUSG00000003068	2658.25	0.376501	0.117901	3.19337	0.00140623	0.00583719
ENSMUSG00000003070	1302.92	-0.630116	0.164068	-3.84058	0.000122743	0.000624054
ENSMUSG00000003072	2727.61	0.0168587	0.168789	0.0998802	0.920439	0.966938
ENSMUSG00000003099	2336.45	0.0626229	0.0617731	1.01376	0.310699	0.526956
ENSMUSG00000003119	2572.98	0.394184	0.0695929	5.66414	1.47761e-08	1.30942e-07
ENSMUSG00000003123	486.875	0.466227	0.0981104	4.75207	2.01347e-06	1.36699e-05
ENSMUSG00000003131	10968.5	-0.00138168	0.0831975	-0.0166073	0.98675	0.995023
ENSMUSG00000003134	585.4	-0.062544	0.0974737	-0.64165	0.5211	0.725021
ENSMUSG00000003135	1319.36	0.483514	0.0741058	6.52464	6.81633e-11	7.78572e-10
ENSMUSG00000003153	1023.81	-0.423646	0.106737	-3.96906	7.21559e-05	0.000381853
ENSMUSG00000003154	1160.97	-0.175026	0.114802	-1.52458	0.127363	0.276905
ENSMUSG00000003161	1177.47	-0.107862	0.112857	-0.955745	0.339201	0.55923
ENSMUSG00000003166	3510.66	0.0109335	0.0531301	0.205787	0.836957	0.928184
ENSMUSG00000003184	1316.27	0.142419	0.118619	1.20064	0.229891	0.429155
ENSMUSG00000003190	383.769	0.752011	0.174577	4.30762	1.65017e-05	9.73339e-05
ENSMUSG00000003198	354.997	0.0977689	0.0971499	1.00637	0.314237	0.530884
ENSMUSG00000003199	3002.15	0.0934554	0.0765401	1.221	0.222087	0.418691
ENSMUSG00000003200	1882.9	0.0799511	0.0705719	1.1329	0.257255	0.463302
ENSMUSG00000003206	41.9939	-1.1362	0.255634	-4.44462	8.80457e-06	5.43988e-05
ENSMUSG00000003208	448.617	0.227427	0.104533	2.17566	0.029581	0.0848626
ENSMUSG00000003226	5471.62	0.318577	0.140937	2.26042	0.0237952	0.0704416
ENSMUSG00000003227	39.7246	2.31264	0.352304	6.56435	5.22604e-11	6.0412e-10
ENSMUSG00000003228	938.87	-0.0594094	0.0892986	-0.66529	0.505865	0.713718
ENSMUSG00000003233	6568.84	-0.200503	0.105158	-1.90669	0.0565603	0.145627
ENSMUSG00000003234	1756.44	-0.0110282	0.0743203	-0.148388	0.882037	0.949429
ENSMUSG00000003235	2469.77	0.130737	0.0668396	1.95598	0.050468	0.132296
ENSMUSG00000003269	4943.08	-0.013219	0.0579855	-0.227971	0.819669	0.919168
ENSMUSG00000003271	244.902	-0.251883	0.136655	-1.84319	0.0653006	0.163198
ENSMUSG00000003273	1041.38	-0.903025	0.183922	-4.90984	9.11522e-07	6.47898e-06
ENSMUSG00000003279	984.249	0.371093	0.0762844	4.86459	1.14692e-06	8.05486e-06
ENSMUSG00000003282	435.987	0.385161	0.119758	3.21616	0.00129918	0.00543384
ENSMUSG00000003283	35.1321	-0.191059	0.270329	-0.706766	0.479712	0.691205
ENSMUSG00000003299	1048.94	0.15049	0.102601	1.46676	0.142442	0.301117
ENSMUSG00000003308	1088.47	0.0841497	0.141054	0.596579	0.550788	0.747765
ENSMUSG00000003309	14.6815	-0.858093	0.472994	-1.81417	0.069651	0.171897
ENSMUSG00000003316	7370.84	0.00081204	0.0937398	0.0086627	0.993088	0.997538
ENSMUSG00000003341	59.0585	-1.98424	0.258788	-7.66745	1.75449e-14	2.74009e-13
ENSMUSG00000003344	2193.36	-0.123368	0.0905683	-1.36216	0.173149	0.348505
ENSMUSG00000003345	3208.62	-0.0278276	0.128884	-0.215913	0.829056	0.923814
ENSMUSG00000003346	1201.62	-0.180225	0.18879	-0.954635	0.339763	0.559835
ENSMUSG00000003348	1464.06	-0.187784	0.0771378	-2.4344	0.0149165	0.0470575
ENSMUSG00000003352	6979.41	-0.448151	0.0984462	-4.55224	5.30771e-06	3.38517e-05
ENSMUSG00000003354	78.5995	-0.763696	0.228237	-3.34606	0.000819677	0.00358986
ENSMUSG00000003355	46.7884	-0.25616	0.229727	-1.11506	0.264823	0.472952
ENSMUSG00000003360	3217.26	0.324907	0.0693941	4.68206	2.84006e-06	1.88953e-05
ENSMUSG00000003363	2213.59	-0.459328	0.118597	-3.87302	0.000107494	0.000551508
ENSMUSG00000003378	5732.66	-0.27845	0.122417	-2.27459	0.0229304	0.0682247
ENSMUSG00000003379	10.0106	0.557046	0.616853	0.903046	0.366501	0.588732
ENSMUSG00000003380	770.642	-0.584883	0.125337	-4.66647	3.06414e-06	2.02923e-05
ENSMUSG00000003382	1035.77	0.210119	0.0675278	3.1116	0.00186079	0.00749123
ENSMUSG00000003402	3401.76	-0.00311454	0.085868	-0.0362712	0.971066	0.988554
ENSMUSG00000003410	19934.2	-0.179162	0.0860542	-2.08197	0.0373452	0.103071
ENSMUSG00000003411	464.322	-0.906059	0.140277	-6.45908	1.05345e-10	1.18394e-09
ENSMUSG00000003418	44.6599	-1.09463	0.246113	-4.44768	8.68046e-06	5.37475e-05
ENSMUSG00000003420	285.387	-0.795427	0.148906	-5.34181	9.20207e-08	7.38444e-07
ENSMUSG00000003421	1152	0.0145708	0.113524	0.12835	0.897872	0.95677
ENSMUSG00000003423	1117.51	-0.0792482	0.0737211	-1.07497	0.282387	0.494195
ENSMUSG00000003429	7327.3	0.408889	0.0749174	5.45786	4.81899e-08	4.03176e-07
ENSMUSG00000003435	5817.34	0.151572	0.0948863	1.5974	0.110176	0.24709
ENSMUSG00000003436	775.934	-0.275978	0.192164	-1.43615	0.150958	0.314662
ENSMUSG00000003437	2711.77	0.192652	0.111889	1.72181	0.0851033	0.202041
ENSMUSG00000003438	1483.71	0.200419	0.0877447	2.28412	0.0223647	0.0667717
ENSMUSG00000003444	247.268	0.0720028	0.125091	0.575605	0.564882	0.758586
ENSMUSG00000003452	1962.34	-0.193135	0.0918975	-2.10163	0.0355856	0.0991236
ENSMUSG00000003458	3573.02	-0.00266214	0.0715554	-0.0372038	0.970322	0.988235
ENSMUSG00000003464	3210.49	0.082699	0.0630484	1.31167	0.18963	0.372916
ENSMUSG00000003469	90.2452	1.04388	0.176416	5.91715	3.27562e-09	3.1461e-08
ENSMUSG00000003476	25.1104	-0.523333	0.298938	-1.75064	0.080008	0.192058
ENSMUSG00000003477	0.117216	0.86	3.53381	0.243363	0.807724	1
ENSMUSG00000003484	2.50539	-3.11817	1.30708	-2.38561	0.0170509	0.0527057
ENSMUSG00000003500	1381.17	-0.431855	0.104536	-4.13117	3.60928e-05	0.000201463
ENSMUSG00000003505	21.0686	0.508882	3.23373	0.157367	0.874956	0.946212
ENSMUSG00000003518	456.51	-0.317015	0.111531	-2.84238	0.00447774	0.0163167
ENSMUSG00000003526	297.34	-0.0920802	0.106091	-0.867938	0.385428	0.608134
ENSMUSG00000003527	1493.86	0.158468	0.064801	2.44546	0.0144668	0.0458173
ENSMUSG00000003528	1943.17	-0.364124	0.0905813	-4.01986	5.82316e-05	0.000314135
ENSMUSG00000003531	1213.8	-0.0892707	0.0782845	-1.14034	0.254146	0.459679
ENSMUSG00000003534	7030.08	0.065322	0.116922	0.55868	0.57638	0.767205
ENSMUSG00000003541	77.3662	-0.227525	0.2048	-1.11097	0.266583	0.474935
ENSMUSG00000003545	6.071	-0.685322	0.604378	-1.13393	0.256824	0.462816
ENSMUSG00000003546	1259.53	-0.0607482	0.090507	-0.671199	0.502094	0.71041
ENSMUSG00000003549	764.873	0.264503	0.156523	1.68987	0.0910526	0.21331
ENSMUSG00000003555	10.2139	-0.195332	0.634431	-0.307886	0.758169	0.885186
ENSMUSG00000003559	461.932	-0.861739	0.0904876	-9.52328	1.67801e-21	4.06079e-20
ENSMUSG00000003573	1455.37	0.256896	0.108464	2.36849	0.0178609	0.0548884
ENSMUSG00000003575	3783.84	-0.385757	0.114747	-3.3618	0.00077436	0.00340487
ENSMUSG00000003581	1370.94	-0.13771	0.094761	-1.45324	0.146157	0.306868
ENSMUSG00000003585	192.443	-0.904663	0.125463	-7.2106	5.5707e-13	7.72617e-12
ENSMUSG00000003604	181.045	-0.157384	0.126803	-1.24118	0.214541	0.40845
ENSMUSG00000003617	461.857	-1.80307	0.117548	-15.339	4.19698e-53	4.01021e-51
ENSMUSG00000003623	698.921	0.324124	0.121958	2.65767	0.00786834	0.0268613
ENSMUSG00000003644	478.104	-0.469142	0.0910394	-5.15317	2.56114e-07	1.94939e-06
ENSMUSG00000003657	459.603	-0.393892	0.166069	-2.37185	0.0176991	0.0544752
ENSMUSG00000003660	9011.97	0.220862	0.0707025	3.12382	0.00178519	0.00721826
ENSMUSG00000003662	1232.76	0.0813493	0.0672814	1.20909	0.226628	0.424691
ENSMUSG00000003665	32.5902	0.234178	0.273682	0.855659	0.392187	0.614463
ENSMUSG00000003680	531.285	0.190927	0.122214	1.56223	0.118234	0.261157
ENSMUSG00000003721	853.766	-0.0616806	0.103128	-0.598097	0.549775	0.746859
ENSMUSG00000003731	3024.67	0.0383406	0.0532977	0.719367	0.471915	0.684928
ENSMUSG00000003746	418.157	-0.872041	0.115308	-7.56274	3.94677e-14	6.05077e-13
ENSMUSG00000003752	334.139	-0.11275	0.117491	-0.959652	0.33723	0.557116
ENSMUSG00000003762	777.278	0.029934	0.121416	0.24654	0.805264	0.909988
ENSMUSG00000003778	5938.83	0.14142	0.0565653	2.50012	0.0124152	0.0401047
ENSMUSG00000003779	1543.68	1.57312	0.0807977	19.4698	1.98055e-84	4.93119e-82
ENSMUSG00000003808	2324.07	0.158038	0.0642206	2.46086	0.0138605	0.0441729
ENSMUSG00000003809	862.049	0.248855	0.0724393	3.43536	0.000591758	0.00266719
ENSMUSG00000003810	7922.3	-0.0641847	0.0553378	-1.15987	0.246102	0.449394
ENSMUSG00000003812	276.706	0.115795	0.107603	1.07613	0.281869	0.49379
ENSMUSG00000003813	830.511	0.131332	0.0958578	1.37007	0.170664	0.344628
ENSMUSG00000003814	17766.1	0.102783	0.0920702	1.11635	0.26427	0.472323
ENSMUSG00000003824	364.932	1.59707	0.102892	15.5219	2.46815e-54	2.48678e-52
ENSMUSG00000003847	5800.92	-0.200342	0.0718872	-2.7869	0.00532149	0.0189643
ENSMUSG00000003848	1226.65	0.162521	0.0654631	2.48263	0.0130417	0.0418603
ENSMUSG00000003849	68.8391	0.0685667	0.230202	0.297855	0.765814	0.888719
ENSMUSG00000003863	2114.65	-0.723021	0.121525	-5.94955	2.68874e-09	2.6066e-08
ENSMUSG00000003865	1243.97	0.100664	0.0938405	1.07271	0.283401	0.495335
ENSMUSG00000003868	2519.63	0.47368	0.0692437	6.84077	7.87668e-12	9.93951e-11
ENSMUSG00000003872	73.0814	-0.927934	0.209721	-4.42461	9.66178e-06	5.93552e-05
ENSMUSG00000003873	1580.81	0.106093	0.103945	1.02066	0.307416	0.523149
ENSMUSG00000003882	4.75005	-1.03051	0.692654	-1.48777	0.136812	0.292632
ENSMUSG00000003923	1455.94	0.367164	0.0978627	3.75182	0.000175553	0.000872842
ENSMUSG00000003929	2746.21	0.174526	0.0994114	1.75559	0.0791578	0.190326
ENSMUSG00000003934	6777.45	-0.369679	0.106249	-3.47938	0.000502575	0.00229518
ENSMUSG00000003948	2933.85	-0.457569	0.0741393	-6.17175	6.75384e-10	7.02346e-09
ENSMUSG00000003949	419.152	-0.324938	0.138646	-2.34365	0.019096	0.0581869
ENSMUSG00000003955	598.199	0.658272	0.102215	6.44009	1.19405e-10	1.33442e-09
ENSMUSG00000003970	12648.8	0.325773	0.086019	3.78722	0.000152343	0.000764047
ENSMUSG00000003974	306.779	-2.1492	0.170924	-12.574	2.93582e-36	1.43978e-34
ENSMUSG00000003992	3049.17	0.0350123	0.0763646	0.458489	0.646601	0.816139
ENSMUSG00000004018	410.847	0.507471	0.116646	4.35052	1.35815e-05	8.12191e-05
ENSMUSG00000004031	1657.69	0.454359	0.0652389	6.96454	3.29485e-12	4.29376e-11
ENSMUSG00000004032	1459.53	0.0584751	0.10029	0.583059	0.559854	0.755083
ENSMUSG00000004035	1182.25	-0.131424	0.0732511	-1.79416	0.0727877	0.178026
ENSMUSG00000004038	0.377764	-0.60063	3.23688	-0.185559	0.852791	1
ENSMUSG00000004040	1480.69	-0.266797	0.0842483	-3.16679	0.0015413	0.00633482
ENSMUSG00000004043	62.0021	-0.846076	0.216396	-3.90985	9.23549e-05	0.000479534
ENSMUSG00000004044	978.874	-0.264075	0.109944	-2.4019	0.0163101	0.0507797
ENSMUSG00000004054	816.544	0.0460533	0.17045	0.270187	0.787016	0.900252
ENSMUSG00000004056	2337.78	0.375361	0.0821135	4.57125	4.84829e-06	3.1175e-05
ENSMUSG00000004069	1224.85	0.0297032	0.062504	0.47522	0.63463	0.807917
ENSMUSG00000004070	968.041	0.0413209	0.0800761	0.51602	0.60584	0.788581
ENSMUSG00000004071	3187.67	0.0498279	0.0591916	0.841806	0.399896	0.622025
ENSMUSG00000004085	481.404	0.494741	0.140546	3.52013	0.000431333	0.00199161
ENSMUSG00000004096	2447.82	0.289582	0.102379	2.82852	0.00467645	0.0169549
ENSMUSG00000004098	58.5429	-1.82123	0.245011	-7.43323	1.05975e-13	1.5565e-12
ENSMUSG00000004099	9602.14	0.481871	0.0667636	7.21757	5.29245e-13	7.36393e-12
ENSMUSG00000004100	1009.19	0.297547	0.099136	3.0014	0.00268738	0.0103923
ENSMUSG00000004105	748.697	-0.332774	0.113995	-2.91919	0.00350937	0.0131546
ENSMUSG00000004110	4247.73	-0.386577	0.0855718	-4.51757	6.2552e-06	3.94861e-05
ENSMUSG00000004113	6404.64	-0.941305	0.112422	-8.37297	5.6186e-17	1.0392e-15
ENSMUSG00000004127	409.793	0.255145	0.105645	2.41511	0.0157306	0.0492895
ENSMUSG00000004151	924.767	0.397006	0.123994	3.20182	0.00136561	0.00568599
ENSMUSG00000004187	1709.23	-1.21244	0.136773	-8.86459	7.67856e-19	1.61125e-17
ENSMUSG00000004207	12376.1	-0.219541	0.0585506	-3.74959	0.000177123	0.000879973
ENSMUSG00000004221	1160.23	0.246575	0.100525	2.45288	0.0141716	0.044987
ENSMUSG00000004231	224.283	-5.95489	0.613959	-9.69917	3.03967e-22	7.68645e-21
ENSMUSG00000004233	451.16	0.284653	0.0875054	3.25298	0.00114203	0.00483751
ENSMUSG00000004263	536.68	-0.22989	0.1591	-1.44494	0.148474	0.310673
ENSMUSG00000004264	3188.17	0.134095	0.0879545	1.52459	0.12736	0.276905
ENSMUSG00000004266	97.2738	-0.290902	0.18367	-1.58383	0.113233	0.252306
ENSMUSG00000004267	1711.87	-0.802128	0.113881	-7.04354	1.8741e-12	2.49245e-11
ENSMUSG00000004268	1782.45	0.573342	0.0690916	8.29829	1.05621e-16	1.90856e-15
ENSMUSG00000004270	748.22	-0.159312	0.090313	-1.764	0.0777318	0.187515
ENSMUSG00000004285	1216.24	-0.0754576	0.0989012	-0.762959	0.445488	0.663682
ENSMUSG00000004296	0.717259	-1.89634	2.27426	-0.833828	0.404378	1
ENSMUSG00000004317	1710.71	-0.180694	0.10934	-1.65258	0.0984163	0.226363
ENSMUSG00000004319	4139.67	-0.0173321	0.0891706	-0.19437	0.845886	0.932376
ENSMUSG00000004328	816.523	0.518194	0.115146	4.50034	6.7845e-06	4.25989e-05
ENSMUSG00000004341	0.125516	-0.582673	3.53381	-0.164885	0.869034	1
ENSMUSG00000004344	0	NA	NA	NA	NA	1
ENSMUSG00000004347	1006.6	-0.197444	0.108288	-1.82332	0.0682551	0.16899
ENSMUSG00000004356	1621.47	0.556791	0.10364	5.37234	7.7723e-08	6.30501e-07
ENSMUSG00000004359	1.52447	0.691046	1.53875	0.449095	0.653363	1
ENSMUSG00000004360	5325.26	0.068776	0.10898	0.63109	0.527982	0.730241
ENSMUSG00000004364	6039.63	0.0219676	0.0698127	0.314665	0.753016	0.882369
ENSMUSG00000004366	1128.91	0.24934	0.163356	1.52636	0.126921	0.276083
ENSMUSG00000004371	13.0745	0.386359	0.415421	0.930043	0.352349	0.573629
ENSMUSG00000004383	2077.8	0.209735	0.0661552	3.17034	0.00152259	0.00627101
ENSMUSG00000004393	1147.52	0.34259	0.0720128	4.75734	1.96158e-06	1.3342e-05
ENSMUSG00000004394	2011.22	0.238975	0.0732831	3.26098	0.00111027	0.00471998
ENSMUSG00000004415	1159.3	-0.399743	0.123048	-3.24867	0.00115946	0.00490735
ENSMUSG00000004446	522.364	-0.471378	0.104128	-4.52691	5.98534e-06	3.78842e-05
ENSMUSG00000004451	992.749	-0.156852	0.0652426	-2.40414	0.0162106	0.0505123
ENSMUSG00000004455	546.131	0.23841	0.0964221	2.47257	0.0134147	0.0428734
ENSMUSG00000004460	1870.06	0.00526655	0.0602933	0.0873489	0.930394	0.971907
ENSMUSG00000004462	624.89	0.251774	0.0752941	3.34388	0.000826162	0.00361423
ENSMUSG00000004473	57.9824	-0.24086	0.246608	-0.976692	0.328722	0.547536
ENSMUSG00000004500	916.5	-0.0290738	0.0730791	-0.39784	0.690748	0.844726
ENSMUSG00000004508	2143.36	-0.23577	0.0648237	-3.6371	0.000275729	0.00132389
ENSMUSG00000004530	8339.87	0.421591	0.0643068	6.55593	5.5296e-11	6.37505e-10
ENSMUSG00000004535	4484.56	0.128216	0.0731957	1.75169	0.079827	0.191659
ENSMUSG00000004540	14.3481	0.29725	1.00308	0.296335	0.766974	0.889149
ENSMUSG00000004542	14.3056	0.571405	2.49369	0.22914	0.81876	0.91869
ENSMUSG00000004552	22.2734	-0.47995	0.422097	-1.13706	0.255513	0.461223
ENSMUSG00000004558	2846.09	0.698127	0.100843	6.9229	4.42486e-12	5.70605e-11
ENSMUSG00000004561	1674.32	-0.185739	0.0751291	-2.47226	0.013426	0.0429042
ENSMUSG00000004562	3725.75	-0.0157627	0.0928818	-0.169707	0.865241	0.941922
ENSMUSG00000004565	1937.3	-0.550959	0.0814117	-6.76757	1.30966e-11	1.60951e-10
ENSMUSG00000004567	2649.04	-0.28574	0.0954231	-2.99445	0.00274941	0.0106037
ENSMUSG00000004568	2010.23	0.0185169	0.0571046	0.324263	0.745739	0.879213
ENSMUSG00000004591	2744.15	0.643208	0.0821564	7.82906	4.91521e-15	7.94969e-14
ENSMUSG00000004609	103.343	-0.311885	0.155103	-2.01083	0.0443435	0.118926
ENSMUSG00000004610	268.209	0.267511	0.157019	1.70368	0.0884405	0.208303
ENSMUSG00000004612	0.240769	0.138666	3.53381	0.0392396	0.968699	1
ENSMUSG00000004626	1072.77	0.805404	0.113217	7.11383	1.12866e-12	1.52933e-11
ENSMUSG00000004630	9.32984	-0.394639	0.479401	-0.823192	0.410399	0.631312
ENSMUSG00000004631	944.353	-0.150361	0.109268	-1.37608	0.168796	0.341977
ENSMUSG00000004633	1115.33	0.104806	0.0866451	1.2096	0.226431	0.424469
ENSMUSG00000004637	367.165	-0.123443	0.0948237	-1.30181	0.19298	0.377819
ENSMUSG00000004642	1390.84	0.621068	0.0870145	7.13752	9.50315e-13	1.29377e-11
ENSMUSG00000004651	0.128474	0.86	3.53381	0.243363	0.807724	1
ENSMUSG00000004654	0.106119	-0.582673	3.53381	-0.164885	0.869034	1
ENSMUSG00000004655	365.315	-0.754727	0.642482	-1.1747	0.240113	0.442148
ENSMUSG00000004661	618.126	-0.0266675	0.103167	-0.25849	0.796029	0.904616
ENSMUSG00000004665	667.707	-0.126844	0.106306	-1.1932	0.232792	0.432853
ENSMUSG00000004667	1429.21	0.370571	0.10268	3.60899	0.000307393	0.00145873
ENSMUSG00000004668	6.97691	0.164208	0.582546	0.281881	0.778035	0.895064
ENSMUSG00000004677	5001.74	0.204669	0.0708238	2.88983	0.00385445	0.0143175
ENSMUSG00000004698	766.647	0.0983076	0.106121	0.926374	0.354252	0.575917
ENSMUSG00000004707	7.39499	0.739009	0.585664	1.26183	0.20701	0.39756
ENSMUSG00000004709	1.16217	-1.87717	1.82473	-1.02874	0.303602	1
ENSMUSG00000004730	136.79	-0.447482	0.137074	-3.26452	0.00109651	0.00466607
ENSMUSG00000004748	79.5052	0.361872	0.212282	1.70468	0.0882545	0.20794
ENSMUSG00000004768	1524.9	0.277692	0.0710236	3.90985	9.23529e-05	0.000479534
ENSMUSG00000004771	3917.34	-0.23158	0.140968	-1.64278	0.100428	0.230026
ENSMUSG00000004788	1190.9	0.211538	0.107643	1.96517	0.0493944	0.130034
ENSMUSG00000004789	4770.38	0.15745	0.0470557	3.34604	0.00081976	0.00358986
ENSMUSG00000004791	121.266	0.136746	0.203213	0.672923	0.500996	0.709463
ENSMUSG00000004798	5402.63	-0.201456	0.0830734	-2.42503	0.015307	0.0481076
ENSMUSG00000004814	22.8285	-0.687822	0.350254	-1.96378	0.0495555	0.130379
ENSMUSG00000004815	1179.19	-0.508658	0.10033	-5.06986	3.98117e-07	2.96146e-06
ENSMUSG00000004821	0.125914	-0.582673	3.53381	-0.164885	0.869034	1
ENSMUSG00000004837	172.574	-0.149663	0.140823	-1.06278	0.287883	0.500365
ENSMUSG00000004842	0.117504	-0.582673	3.53381	-0.164885	0.869034	1
ENSMUSG00000004843	1053.59	-0.878263	0.118898	-7.38669	1.50528e-13	2.17996e-12
ENSMUSG00000004846	2322.41	-0.142618	0.123623	-1.15365	0.248644	0.452349
ENSMUSG00000004849	2348.45	0.0747063	0.0600373	1.24433	0.213378	0.406863
ENSMUSG00000004864	10.1679	-0.0698176	0.466551	-0.149646	0.881044	0.948794
ENSMUSG00000004865	5009.56	0.282715	0.0835036	3.38566	0.000710067	0.00314945
ENSMUSG00000004872	748.272	-8.02611	0.320432	-25.0478	1.8472e-138	1.22645e-135
ENSMUSG00000004880	1408.15	0.944754	0.153024	6.1739	6.66266e-10	6.9342e-09
ENSMUSG00000004885	700.063	-0.763323	0.122625	-6.22488	4.81939e-10	5.09568e-09
ENSMUSG00000004891	13012.5	0.745413	0.125836	5.92367	3.14838e-09	3.02951e-08
ENSMUSG00000004892	1496.62	0.287568	0.161502	1.78058	0.074981	0.18222
ENSMUSG00000004894	6.76847	-1.03504	0.620259	-1.66873	0.0951712	0.220979
ENSMUSG00000004895	2027.48	0.0525419	0.0921346	0.570274	0.568492	0.761254
ENSMUSG00000004896	1620.01	0.0345416	0.104379	0.330924	0.740702	0.876466
ENSMUSG00000004897	7596.29	0.608371	0.070399	8.64175	5.53575e-18	1.09673e-16
ENSMUSG00000004902	109.434	-1.19495	0.194688	-6.13779	8.36795e-10	8.60181e-09
ENSMUSG00000004929	1454.13	0.463775	0.114492	4.05072	5.1061e-05	0.000278235
ENSMUSG00000004931	490.429	0.0456328	0.148668	0.306944	0.758886	0.885237
ENSMUSG00000004933	318.358	-0.410535	0.16822	-2.44047	0.0146683	0.0463818
ENSMUSG00000004934	1104.37	-0.05882	0.159759	-0.368178	0.71274	0.857926
ENSMUSG00000004936	1057.92	-0.131173	0.0955019	-1.37351	0.169594	0.343205
ENSMUSG00000004937	5242.2	-0.0098325	0.1199	-0.0820059	0.934642	0.973164
ENSMUSG00000004939	5.09694	-1.03634	0.759556	-1.3644	0.172442	0.347407
ENSMUSG00000004945	1028.31	0.00730267	0.0723062	0.100996	0.919553	0.966509
ENSMUSG00000004947	747.968	0.00734505	0.122877	0.0597754	0.952335	0.981051
ENSMUSG00000004948	0.859013	0.626608	1.7348	0.361198	0.717951	1
ENSMUSG00000004951	18.941	0.234664	0.358139	0.655232	0.512319	0.718654
ENSMUSG00000004952	477.528	-1.51048	0.141725	-10.6579	1.60251e-26	5.01537e-25
ENSMUSG00000004961	1690.29	-0.454014	0.0999336	-4.54316	5.54184e-06	3.52408e-05
ENSMUSG00000004980	55784.9	0.466032	0.0932803	4.99604	5.85205e-07	4.27455e-06
ENSMUSG00000004988	10.9173	0.156749	0.54166	0.289386	0.772286	0.891936
ENSMUSG00000004994	426.366	0.154498	0.119303	1.29501	0.195318	0.381215
ENSMUSG00000004996	298.062	0.0264658	0.112892	0.234435	0.814647	0.915887
ENSMUSG00000005034	6928.39	-0.175207	0.0707728	-2.47563	0.0133003	0.0425498
ENSMUSG00000005043	175.675	-0.224529	0.142503	-1.57561	0.115115	0.255598
ENSMUSG00000005045	5693.6	-0.62214	0.109524	-5.68042	1.34367e-08	1.19893e-07
ENSMUSG00000005054	367.347	0.283029	0.0911238	3.10598	0.00189646	0.00761822
ENSMUSG00000005057	1242.77	-0.173515	0.141097	-1.22976	0.218788	0.414464
ENSMUSG00000005069	2433.46	0.057049	0.0788073	0.723905	0.469124	0.682443
ENSMUSG00000005078	1407.34	0.00634512	0.0732324	0.0866436	0.930955	0.972089
ENSMUSG00000005087	150.149	-0.88905	0.148877	-5.97169	2.34808e-09	2.28404e-08
ENSMUSG00000005089	6012.33	-0.760326	0.125839	-6.04206	1.52162e-09	1.51018e-08
ENSMUSG00000005102	1495.77	0.348561	0.0590551	5.9023	3.58467e-09	3.42641e-08
ENSMUSG00000005103	4544.72	-0.000471659	0.0696073	-0.006776	0.994594	0.998179
ENSMUSG00000005107	28.4568	-0.880177	0.284895	-3.08948	0.00200506	0.00800602
ENSMUSG00000005124	161.634	-0.471329	0.194327	-2.42545	0.0152896	0.0480704
ENSMUSG00000005125	749.812	1.75377	0.162751	10.7757	4.48127e-27	1.45593e-25
ENSMUSG00000005131	5.82368	-0.467837	0.644273	-0.726148	0.467748	0.681234
ENSMUSG00000005142	962.75	-0.128817	0.0723895	-1.7795	0.075158	0.182582
ENSMUSG00000005148	164.976	0.0624124	0.178246	0.350148	0.726228	0.866987
ENSMUSG00000005150	896.776	-0.0465789	0.102277	-0.455419	0.648808	0.817728
ENSMUSG00000005161	15748.9	0.256963	0.0540981	4.74995	2.0347e-06	1.38031e-05
ENSMUSG00000005198	11599.5	0.204157	0.0872801	2.3391	0.0193303	0.0588177
ENSMUSG00000005202	0.128474	0.86	3.53381	0.243363	0.807724	1
ENSMUSG00000005204	3422.11	0.0858146	0.0443848	1.93343	0.0531838	0.138239
ENSMUSG00000005220	171.839	-5.69704	0.364667	-15.6226	5.10899e-55	5.27061e-53
ENSMUSG00000005225	1834.2	0.224473	0.114799	1.95535	0.0505413	0.132475
ENSMUSG00000005232	1.85284	-0.89405	1.10969	-0.805677	0.420429	0.640727
ENSMUSG00000005233	1006.84	1.70139	0.113313	15.0149	5.86072e-51	5.17944e-49
ENSMUSG00000005237	458.215	-0.481431	0.104633	-4.60113	4.20198e-06	2.72424e-05
ENSMUSG00000005251	25.13	0.438632	0.385702	1.13723	0.255443	0.461161
ENSMUSG00000005262	2062.23	0.216484	0.0779732	2.77639	0.00549662	0.0195452
ENSMUSG00000005267	941.088	0.127848	0.0748136	1.70889	0.0874709	0.206394
ENSMUSG00000005268	41.8464	-0.672597	0.239986	-2.80264	0.00506854	0.0181629
ENSMUSG00000005299	2108.86	0.0298018	0.0612103	0.486876	0.626346	0.80276
ENSMUSG00000005312	5882.56	0.191793	0.0425445	4.50806	6.54239e-06	4.12387e-05
ENSMUSG00000005320	78.3737	-0.778377	0.181918	-4.27873	1.87964e-05	0.000109967
ENSMUSG00000005338	9186.65	-0.942871	0.106596	-8.84524	9.13286e-19	1.90869e-17
ENSMUSG00000005339	0.263124	1.60948	3.52812	0.456186	0.648256	1
ENSMUSG00000005354	2482.09	0.19613	0.0812155	2.41494	0.0157379	0.0493003
ENSMUSG00000005355	0	NA	NA	NA	NA	1
ENSMUSG00000005357	158.116	-1.9692	0.170642	-11.54	8.29669e-31	3.19219e-29
ENSMUSG00000005360	5617.94	-0.407996	0.121311	-3.36323	0.000770374	0.00338849
ENSMUSG00000005362	1187.6	0.0390487	0.112144	0.348201	0.727689	0.868091
ENSMUSG00000005364	0.721676	-0.757828	2.06479	-0.367023	0.713602	1
ENSMUSG00000005370	2601.14	0.703859	0.075142	9.36705	7.45848e-21	1.75732e-19
ENSMUSG00000005371	7101.08	0.0160362	0.0589882	0.271854	0.785735	0.899461
ENSMUSG00000005373	81.2941	0.121384	0.184365	0.65839	0.510287	0.716833
ENSMUSG00000005374	1167.82	0.498717	0.0658552	7.57293	3.64903e-14	5.6076e-13
ENSMUSG00000005378	1129.95	0.280356	0.10774	2.60215	0.00926413	0.0310451
ENSMUSG00000005397	4545.7	-0.877498	0.0786995	-11.15	7.1613e-29	2.53673e-27
ENSMUSG00000005410	2409.9	1.35354	0.0851064	15.9041	5.9372e-57	6.54203e-55
ENSMUSG00000005413	343.093	-0.0225611	0.126965	-0.177695	0.858962	0.939114
ENSMUSG00000005417	9951.66	0.170012	0.0511972	3.32073	0.000897815	0.00389153
ENSMUSG00000005442	10377.5	0.0637848	0.149087	0.427837	0.66877	0.831928
ENSMUSG00000005447	3910.38	-0.300154	0.0808415	-3.71288	0.000204917	0.00100628
ENSMUSG00000005465	31.1507	-0.116083	0.282332	-0.411157	0.680957	0.838748
ENSMUSG00000005469	4551.46	-0.293848	0.0630881	-4.65773	3.19711e-06	2.11135e-05
ENSMUSG00000005470	426.307	1.30597	0.113162	11.5408	8.21674e-31	3.16614e-29
ENSMUSG00000005474	0.125516	-0.582673	3.53381	-0.164885	0.869034	1
ENSMUSG00000005481	1714.48	0.337526	0.0789351	4.276	1.90285e-05	0.000111224
ENSMUSG00000005483	1426.13	0.116388	0.0632224	1.84093	0.0656314	0.163835
ENSMUSG00000005493	7.06237	0.606978	0.702451	0.864087	0.38754	0.609818
ENSMUSG00000005501	1815.47	0.31464	0.0598494	5.25719	1.46274e-07	1.14222e-06
ENSMUSG00000005503	84.9119	-9.78901	1.03603	-9.44857	3.43498e-21	8.22047e-20
ENSMUSG00000005505	527.352	0.163014	0.0816681	1.99606	0.0459277	0.122513
ENSMUSG00000005506	11569	0.371	0.0683576	5.42734	5.71985e-08	4.73043e-07
ENSMUSG00000005510	1302.22	0.163608	0.0997788	1.63971	0.101065	0.23106
ENSMUSG00000005514	2612.76	-0.066504	0.107465	-0.618841	0.536021	0.736677
ENSMUSG00000005533	6857.77	-0.0840553	0.0802864	-1.04694	0.295126	0.508821
ENSMUSG00000005534	4602.29	0.137012	0.0774169	1.76979	0.0767623	0.185644
ENSMUSG00000005540	24.4807	0.0111014	0.329754	0.0336656	0.973144	0.989499
ENSMUSG00000005547	12.7068	-2.21448	0.561882	-3.94119	8.10795e-05	0.00042577
ENSMUSG00000005553	40.093	0.127639	0.231739	0.550788	0.581779	0.770962
ENSMUSG00000005566	13144.1	0.286187	0.0850424	3.36523	0.000764812	0.00336746
ENSMUSG00000005575	3372.82	-0.168052	0.0795914	-2.11143	0.0347352	0.0970891
ENSMUSG00000005580	315.857	-0.868196	0.100811	-8.61208	7.17463e-18	1.40849e-16
ENSMUSG00000005583	1904.91	2.13164	0.102065	20.8851	7.31028e-97	2.5239e-94
ENSMUSG00000005609	4483.3	-0.0248153	0.0508901	-0.487626	0.625815	0.802541
ENSMUSG00000005610	67762.6	0.102234	0.0903519	1.13151	0.25784	0.464161
ENSMUSG00000005611	118.303	-0.412997	0.149499	-2.76253	0.00573547	0.0202916
ENSMUSG00000005615	2175.12	0.147418	0.0810248	1.81942	0.0688481	0.170159
ENSMUSG00000005621	2016.19	0.00779988	0.0666691	0.116994	0.906865	0.961331
ENSMUSG00000005625	3223.07	0.202947	0.0771653	2.63003	0.00853785	0.0288691
ENSMUSG00000005628	134.533	0.160081	0.156729	1.02139	0.30707	0.5228
ENSMUSG00000005640	189.12	-0.697574	0.248734	-2.8045	0.00503946	0.0180762
ENSMUSG00000005649	10.0631	-1.03812	0.654924	-1.58511	0.112942	0.251805
ENSMUSG00000005656	2683.49	0.0155313	0.106614	0.145678	0.884176	0.95029
ENSMUSG00000005667	572.391	0.21584	0.0889939	2.42534	0.0152942	0.0480769
ENSMUSG00000005672	3143.65	-0.162653	0.103744	-1.56783	0.11692	0.25894
ENSMUSG00000005674	232.754	0.351509	0.184872	1.90136	0.0572545	0.147047
ENSMUSG00000005677	25.9506	0.266983	0.358238	0.745267	0.45611	0.672333
ENSMUSG00000005681	2.38885	-1.83361	1.10156	-1.66456	0.0960015	0.222467
ENSMUSG00000005682	3067.79	0.290789	0.0869776	3.34326	0.000827996	0.00362103
ENSMUSG00000005683	8391.76	0.176277	0.0478885	3.68098	0.000232343	0.00113088
ENSMUSG00000005686	210.024	-1.09408	0.231318	-4.72979	2.24753e-06	1.51438e-05
ENSMUSG00000005687	2810.31	0.0818226	0.0588661	1.38998	0.164535	0.335356
ENSMUSG00000005696	2.9602	-0.347998	0.879734	-0.395572	0.692421	0.845773
ENSMUSG00000005698	5596.05	0.448955	0.0573353	7.83033	4.86583e-15	7.87473e-14
ENSMUSG00000005699	342.355	-0.023577	0.113757	-0.207258	0.835808	0.927546
ENSMUSG00000005705	22.26	-0.131921	0.340524	-0.387405	0.698456	0.849407
ENSMUSG00000005716	37.4447	-8.60691	1.08703	-7.91783	2.41691e-15	3.98875e-14
ENSMUSG00000005718	450.788	0.637918	0.123884	5.14932	2.61432e-07	1.9887e-06
ENSMUSG00000005732	3680.45	0.647415	0.0940527	6.88353	5.83871e-12	7.45133e-11
ENSMUSG00000005763	27.6265	-0.60227	0.28917	-2.08276	0.0372734	0.102917
ENSMUSG00000005774	911.586	0.11224	0.0830173	1.35201	0.176373	0.353182
ENSMUSG00000005779	3032.83	0.100366	0.131171	0.765155	0.444179	0.66261
ENSMUSG00000005800	0.368934	-1.93189	2.6559	-0.727395	0.466984	1
ENSMUSG00000005802	1031.46	0.0931896	0.124329	0.749537	0.453533	0.670155
ENSMUSG00000005803	66.4488	0.260986	0.227817	1.1456	0.251961	0.456787
ENSMUSG00000005804	2355.15	-0.115641	0.0790413	-1.46305	0.143454	0.302689
ENSMUSG00000005813	1840.27	0.063491	0.0658039	0.964851	0.334619	0.554324
ENSMUSG00000005823	627.968	-0.0722601	0.117215	-0.616476	0.537581	0.737995
ENSMUSG00000005824	2.23147	0.213487	1.20163	0.177664	0.858987	0.939114
ENSMUSG00000005836	20.6878	-1.0348	0.377981	-2.7377	0.00618713	0.0216998
ENSMUSG00000005846	3360.52	0.426434	0.0733794	5.81136	6.19685e-09	5.74101e-08
ENSMUSG00000005864	3.2713	-0.378814	0.84913	-0.44612	0.655511	0.822613
ENSMUSG00000005871	17674.5	-0.00243926	0.100935	-0.0241667	0.98072	0.992642
ENSMUSG00000005873	3951.09	-0.899839	0.101022	-8.90735	5.22691e-19	1.10667e-17
ENSMUSG00000005881	3011.02	-0.17946	0.0848239	-2.11568	0.0343724	0.09621
ENSMUSG00000005882	924.084	0.20314	0.0723397	2.80813	0.00498295	0.0179032
ENSMUSG00000005883	30.3289	-1.13473	0.356976	-3.17873	0.0014792	0.00610885
ENSMUSG00000005886	3909.41	-0.0193452	0.0641757	-0.301441	0.763078	0.887285
ENSMUSG00000005891	2.13416	0.670239	2.01588	0.33248	0.739527	0.875998
ENSMUSG00000005892	26.3281	0.333724	0.546764	0.610361	0.541623	0.741152
ENSMUSG00000005893	2816.86	0.3094	0.0805854	3.83941	0.000123332	0.000626925
ENSMUSG00000005897	607.689	-0.105663	0.0893398	-1.18271	0.236924	0.438176
ENSMUSG00000005899	3032.02	0.359287	0.0692189	5.1906	2.0962e-07	1.61113e-06
ENSMUSG00000005907	972.354	-0.0943045	0.0723217	-1.30396	0.192248	0.376639
ENSMUSG00000005917	1431.81	0.51556	0.207635	2.48301	0.0130276	0.0418376
ENSMUSG00000005936	4786.89	0.345015	0.0588941	5.85823	4.67838e-09	4.39876e-08
ENSMUSG00000005947	34.2782	0.838539	0.270549	3.0994	0.00193911	0.00777145
ENSMUSG00000005949	1022.75	-0.0357081	0.0857867	-0.416243	0.677232	0.836533
ENSMUSG00000005950	22.4813	1.37177	0.343945	3.98834	6.6538e-05	0.000354076
ENSMUSG00000005951	61.8361	-0.169272	0.202348	-0.836541	0.402851	0.624785
ENSMUSG00000005952	10.9452	-6.09409	1.42845	-4.26624	1.98796e-05	0.000116042
ENSMUSG00000005958	1093.88	-1.0823	0.107601	-10.0585	8.42631e-24	2.32613e-22
ENSMUSG00000005968	119.367	-0.300014	0.200709	-1.49477	0.134974	0.289563
ENSMUSG00000005973	1956.08	0.418664	0.100246	4.17638	2.96182e-05	0.000167746
ENSMUSG00000005980	349.584	-0.145539	0.0954676	-1.52449	0.127387	0.276933
ENSMUSG00000005981	1791.35	0.233971	0.0630747	3.70942	0.000207733	0.00101895
ENSMUSG00000005982	2058.69	-0.0563145	0.108732	-0.517922	0.604512	0.787699
ENSMUSG00000005983	94.8119	-0.00278847	0.180556	-0.0154438	0.987678	0.995327
ENSMUSG00000005986	985.726	-0.921248	0.121439	-7.58607	3.29752e-14	5.08249e-13
ENSMUSG00000005994	11.9971	0.946275	0.506963	1.86656	0.0619635	0.156489
ENSMUSG00000006005	8687.87	0.325269	0.0734126	4.4307	9.39283e-06	5.77989e-05
ENSMUSG00000006007	0.612678	-1.59283	2.39549	-0.664928	0.506096	1
ENSMUSG00000006010	1350.41	0.200602	0.0892039	2.24881	0.0245249	0.072263
ENSMUSG00000006014	34.4087	-0.635376	0.287658	-2.20879	0.0271894	0.0789995
ENSMUSG00000006019	980.997	-0.151526	0.130171	-1.16406	0.244399	0.447305
ENSMUSG00000006021	656.271	-0.0828079	0.139194	-0.59491	0.551904	0.748428
ENSMUSG00000006024	3068.36	-0.154489	0.0685532	-2.25357	0.0242235	0.071497
ENSMUSG00000006050	984.556	-0.0350178	0.0678297	-0.516261	0.605672	0.788501
ENSMUSG00000006056	0.78355	1.15403	1.82674	0.631745	0.527553	1
ENSMUSG00000006057	337.189	-0.221234	0.436858	-0.506421	0.612561	0.79324
ENSMUSG00000006058	1110.64	0.0502075	0.0834543	0.601617	0.547429	0.744927
ENSMUSG00000006095	1972.51	-0.0880659	0.069502	-1.2671	0.20512	0.394728
ENSMUSG00000006127	1526.94	0.0120634	0.0644657	0.18713	0.851559	0.935284
ENSMUSG00000006134	4276.91	0.322453	0.101521	3.17622	0.0014921	0.00615721
ENSMUSG00000006143	0.623648	-0.440833	2.12445	-0.207504	0.835616	1
ENSMUSG00000006154	56.2726	-0.709099	0.309819	-2.28875	0.0220938	0.0661383
ENSMUSG00000006169	2854.57	0.120939	0.0642153	1.88334	0.0596546	0.151947
ENSMUSG00000006179	1.11319	-0.840667	1.62744	-0.516557	0.605465	1
ENSMUSG00000006191	435.069	0.510418	0.0931328	5.48054	4.2403e-08	3.573e-07
ENSMUSG00000006200	0	NA	NA	NA	NA	1
ENSMUSG00000006204	1.11391	0.363958	1.83101	0.198775	0.842439	1
ENSMUSG00000006205	303.411	1.0436	0.165719	6.2974	3.02681e-10	3.25483e-09
ENSMUSG00000006215	1689.58	0.25022	0.102013	2.45282	0.0141742	0.0449898
ENSMUSG00000006216	1.00133	-0.53101	1.5399	-0.344834	0.730219	1
ENSMUSG00000006218	277.29	-1.52274	0.175296	-8.68671	3.73092e-18	7.49484e-17
ENSMUSG00000006219	1214.61	-1.04416	0.112207	-9.30569	1.33125e-20	3.09995e-19
ENSMUSG00000006221	11.2585	0.0278237	0.82265	0.033822	0.973019	0.989411
ENSMUSG00000006235	47.7407	-0.334446	0.225087	-1.48585	0.137319	0.293401
ENSMUSG00000006241	293.364	-0.560611	0.171778	-3.26357	0.00110016	0.00468007
ENSMUSG00000006262	2334.94	0.416197	0.115661	3.59843	0.000320139	0.00151272
ENSMUSG00000006269	6.11324	1.54364	0.724647	2.13019	0.033156	0.0934212
ENSMUSG00000006270	110.828	8.28407	0.849103	9.75627	1.73417e-22	4.44599e-21
ENSMUSG00000006273	5861.14	-0.277449	0.0833637	-3.32818	0.000874159	0.00380045
ENSMUSG00000006276	4355.2	0.145575	0.0781332	1.86317	0.0624387	0.157411
ENSMUSG00000006281	418.213	-0.290676	0.103897	-2.79775	0.00514605	0.0183973
ENSMUSG00000006288	2380.08	0.0747359	0.0648377	1.15266	0.249049	0.452902
ENSMUSG00000006289	670.883	0.374149	0.0732185	5.11003	3.22101e-07	2.42809e-06
ENSMUSG00000006299	3357.06	0.111562	0.0986329	1.13108	0.25802	0.464313
ENSMUSG00000006301	224.913	-0.225361	0.147527	-1.52759	0.126613	0.275622
ENSMUSG00000006304	5024.74	0.0377236	0.0606496	0.621993	0.533947	0.735113
ENSMUSG00000006307	6650.58	0.0168735	0.121384	0.13901	0.889443	0.953043
ENSMUSG00000006310	29.5892	-0.722421	0.285593	-2.52954	0.0114211	0.0372842
ENSMUSG00000006311	0.915048	1.47211	1.74926	0.841558	0.400036	1
ENSMUSG00000006313	34.717	-0.583956	0.281555	-2.07404	0.0380758	0.104731
ENSMUSG00000006315	1220.15	-0.113601	0.0681202	-1.66766	0.0953831	0.221352
ENSMUSG00000006333	11264.4	0.377972	0.0572937	6.5971	4.19289e-11	4.89719e-10
ENSMUSG00000006335	426.515	0.174301	0.131177	1.32875	0.183929	0.364481
ENSMUSG00000006342	133.368	-0.816582	0.163475	-4.99514	5.87939e-07	4.29331e-06
ENSMUSG00000006344	104.638	0.107311	0.164004	0.65432	0.512905	0.719067
ENSMUSG00000006345	47.1654	-0.41394	0.232304	-1.78188	0.0747681	0.181857
ENSMUSG00000006356	3141.78	0.0544829	0.102769	0.530148	0.596009	0.781992
ENSMUSG00000006360	56.2158	-0.0176327	0.248547	-0.0709432	0.943443	0.977376
ENSMUSG00000006362	2464.22	-0.66122	0.10124	-6.53119	6.52493e-11	7.47595e-10
ENSMUSG00000006369	1081.12	0.623065	0.0793131	7.85577	3.97338e-15	6.45463e-14
ENSMUSG00000006373	7483.26	-0.358614	0.0889701	-4.03073	5.56034e-05	0.000301402
ENSMUSG00000006378	45.2408	1.05409	0.256261	4.11333	3.89996e-05	0.000216521
ENSMUSG00000006386	529.605	-0.0828905	0.147388	-0.562397	0.573845	0.76558
ENSMUSG00000006389	3.72748	-0.258404	0.819211	-0.31543	0.752435	0.882008
ENSMUSG00000006390	429.511	-0.256873	0.0916536	-2.80265	0.00506852	0.0181629
ENSMUSG00000006392	1265.79	0.34631	0.0704982	4.91232	9.00053e-07	6.39923e-06
ENSMUSG00000006395	315.374	-0.318538	0.118614	-2.6855	0.00724217	0.024934
ENSMUSG00000006398	1599.41	1.50434	0.112502	13.3716	8.86134e-41	5.41169e-39
ENSMUSG00000006403	193.744	0.505357	0.162438	3.11108	0.00186406	0.00749969
ENSMUSG00000006411	33.6053	-1.87122	0.303144	-6.17271	6.71285e-10	6.98363e-09
ENSMUSG00000006412	1575.96	0.169999	0.0741204	2.29355	0.0218165	0.0654067
ENSMUSG00000006418	3044.91	0.0632462	0.0794802	0.795748	0.426179	0.646024
ENSMUSG00000006423	1088.62	0.586741	0.0726004	8.08179	6.38253e-16	1.09305e-14
ENSMUSG00000006435	567.13	-0.695864	0.108829	-6.39412	1.61471e-10	1.78072e-09
ENSMUSG00000006442	1512.01	0.175241	0.094711	1.85027	0.0642742	0.161094
ENSMUSG00000006445	247.935	-1.54976	0.130018	-11.9196	9.35948e-33	3.96652e-31
ENSMUSG00000006456	2323.15	0.373154	0.0813634	4.58627	4.51245e-06	2.91676e-05
ENSMUSG00000006457	26.7796	-1.35364	0.420223	-3.22125	0.00127631	0.0053451
ENSMUSG00000006462	0.252154	0.138666	3.53381	0.0392396	0.968699	1
ENSMUSG00000006463	719.008	-0.0970778	0.0855341	-1.13496	0.256392	0.462256
ENSMUSG00000006464	1733.67	-0.0841963	0.06488	-1.29772	0.194383	0.379875
ENSMUSG00000006469	0.978464	0.894449	1.53924	0.581096	0.561176	1
ENSMUSG00000006471	671.302	0.14544	0.0848848	1.71338	0.0866422	0.204999
ENSMUSG00000006476	4182.24	0.48945	0.109503	4.46975	7.83099e-06	4.87793e-05
ENSMUSG00000006488	2.21593	1.47304	1.92074	0.766914	0.443133	0.661773
ENSMUSG00000006490	62.5549	0.790843	3.22866	0.244945	0.806499	0.910687
ENSMUSG00000006494	990.928	0.353061	0.102771	3.43543	0.000591616	0.00266712
ENSMUSG00000006498	6214.4	0.722619	0.0894281	8.08045	6.45299e-16	1.10439e-14
ENSMUSG00000006517	843.468	-0.20976	0.110161	-1.90413	0.0568937	0.146267
ENSMUSG00000006519	128.9	-0.299159	0.164594	-1.81756	0.069132	0.170795
ENSMUSG00000006522	31.2788	-1.81841	0.419764	-4.33199	1.47768e-05	8.79207e-05
ENSMUSG00000006526	646.401	-0.221596	0.0765375	-2.89526	0.00378839	0.0140842
ENSMUSG00000006527	1555.86	0.414576	0.0927241	4.47108	7.78272e-06	4.8502e-05
ENSMUSG00000006529	0.973432	-0.502753	1.69573	-0.296481	0.766862	1
ENSMUSG00000006538	16.86	-0.210991	0.373286	-0.565227	0.57192	0.763995
ENSMUSG00000006542	1.24669	0.731924	1.34957	0.542338	0.587585	1
ENSMUSG00000006546	8.67292	-5.75517	1.12238	-5.12764	2.93404e-07	2.22276e-06
ENSMUSG00000006567	225.95	-0.231016	0.129237	-1.78754	0.0738506	0.180099
ENSMUSG00000006570	0.117504	-0.582673	3.53381	-0.164885	0.869034	1
ENSMUSG00000006574	229.021	-0.31856	0.177644	-1.79325	0.0729336	0.178297
ENSMUSG00000006575	5233.18	-0.258325	0.117962	-2.1899	0.0285318	0.0822845
ENSMUSG00000006576	2585.63	-0.654638	0.118025	-5.54661	2.91261e-08	2.4965e-07
ENSMUSG00000006585	589.108	1.31228	0.2022	6.48998	8.58476e-11	9.71988e-10
ENSMUSG00000006586	5718.71	-1.14431	0.10402	-11.0008	3.78622e-28	1.28662e-26
ENSMUSG00000006587	0.245978	0.138666	3.53381	0.0392396	0.968699	1
ENSMUSG00000006589	919.653	0.411936	0.0857264	4.80524	1.54566e-06	1.06558e-05
ENSMUSG00000006599	1440.74	0.256872	0.0642784	3.99624	6.43573e-05	0.000343743
ENSMUSG00000006611	64.8219	-0.578001	0.307383	-1.8804	0.0600541	0.15277
ENSMUSG00000006638	9.20949	0.79092	0.559303	1.41412	0.157328	0.324376
ENSMUSG00000006641	695.466	-0.568218	0.0837675	-6.78328	1.1748e-11	1.45412e-10
ENSMUSG00000006642	1.57623	1.75182	1.52089	1.15184	0.249387	1
ENSMUSG00000006649	190.222	-4.42399	0.271503	-16.2945	1.08022e-59	1.3194e-57
ENSMUSG00000006651	11898.7	-0.715049	0.0775007	-9.22636	2.79995e-20	6.41044e-19
ENSMUSG00000006673	5016.39	0.200426	0.0536069	3.73881	0.000184891	0.000915929
ENSMUSG00000006675	370.935	-0.562488	0.102586	-5.48307	4.18006e-08	3.52454e-07
ENSMUSG00000006676	6703.53	0.0561586	0.0731619	0.767594	0.442728	0.661416
ENSMUSG00000006678	1079.52	1.14575	0.13307	8.6101	7.29979e-18	1.43198e-16
ENSMUSG00000006699	11109.6	-0.0231319	0.0721151	-0.320764	0.748389	0.88047
ENSMUSG00000006705	1362.08	0.339483	0.0868698	3.90796	9.30797e-05	0.000482911
ENSMUSG00000006711	219.973	-0.766096	0.141356	-5.41963	5.97239e-08	4.93141e-07
ENSMUSG00000006715	437.803	1.45248	0.129292	11.2341	2.77284e-29	9.97222e-28
ENSMUSG00000006717	273.08	0.719387	0.132658	5.42286	5.86517e-08	4.84906e-07
ENSMUSG00000006720	870.296	0.74545	0.085888	8.67933	3.98117e-18	7.98515e-17
ENSMUSG00000006724	25.5957	0.0783758	0.342751	0.228667	0.819128	0.918919
ENSMUSG00000006728	13621.3	0.751059	0.0764932	9.81864	9.35987e-23	2.43582e-21
ENSMUSG00000006731	1052.83	-0.769435	0.124532	-6.1786	6.46726e-10	6.73897e-09
ENSMUSG00000006732	416.434	0.493265	0.0891409	5.53354	3.13828e-08	2.68194e-07
ENSMUSG00000006736	1291.8	0.278463	0.073897	3.76826	0.000164389	0.000820016
ENSMUSG00000006740	5903.75	0.360828	0.101317	3.56138	0.000368905	0.00172458
ENSMUSG00000006763	887.864	0.461384	0.0734071	6.28527	3.27274e-10	3.51199e-09
ENSMUSG00000006764	98.5914	-4.59275	0.325083	-14.1279	2.55529e-45	1.84823e-43
ENSMUSG00000006777	1.5361	-0.847255	1.46162	-0.57967	0.562137	1
ENSMUSG00000006782	449.651	-0.202412	0.121247	-1.66942	0.0950352	0.220743
ENSMUSG00000006784	90.4901	-0.0845318	0.202825	-0.416772	0.676845	0.836321
ENSMUSG00000006800	5088.46	-1.23506	0.083638	-14.7668	2.39931e-49	2.01061e-47
ENSMUSG00000006818	2025.83	-0.142557	0.06256	-2.27872	0.0226836	0.0676147
ENSMUSG00000006850	388.712	0.120438	0.0873972	1.37806	0.168186	0.341057
ENSMUSG00000006906	1188.14	-0.235195	0.0764524	-3.07635	0.0020955	0.00832477
ENSMUSG00000006920	1168.67	-0.31498	0.0864738	-3.64249	0.000270012	0.00129812
ENSMUSG00000006930	5793.99	-0.375376	0.125044	-3.00195	0.00268253	0.0103798
ENSMUSG00000006931	354.202	-0.380639	0.221075	-1.72177	0.0851121	0.202044
ENSMUSG00000006932	28861.8	0.312848	0.0684551	4.57013	4.87429e-06	3.13188e-05
ENSMUSG00000006941	2326.67	0.603958	0.0904134	6.67996	2.39004e-11	2.8612e-10
ENSMUSG00000006948	27.2415	-1.09301	1.41962	-0.769932	0.44134	0.6602
ENSMUSG00000006958	544.844	-0.793664	0.148666	-5.33858	9.36751e-08	7.512e-07
ENSMUSG00000006998	8179.12	0.18835	0.0670407	2.80949	0.00496206	0.0178405
ENSMUSG00000007021	1182.26	-0.621836	0.0867774	-7.16588	7.72898e-13	1.06116e-11
ENSMUSG00000007029	3540.34	0.210607	0.111074	1.8961	0.0579474	0.14849
ENSMUSG00000007030	31.2687	-0.177818	0.37372	-0.475807	0.634212	0.807667
ENSMUSG00000007033	51.8674	-0.0915477	0.365845	-0.250236	0.802405	0.908225
ENSMUSG00000007034	1.59518	-0.588835	1.33432	-0.441301	0.658995	1
ENSMUSG00000007035	205.422	0.630327	0.181601	3.47095	0.000518624	0.00236181
ENSMUSG00000007036	1297.78	-0.0505689	0.111534	-0.453395	0.650264	0.818731
ENSMUSG00000007038	733.681	-0.277537	0.100487	-2.76192	0.00574632	0.0203106
ENSMUSG00000007039	5228.42	0.35975	0.126277	2.8489	0.00438704	0.0160336
ENSMUSG00000007041	1684.68	0.529932	0.145857	3.63323	0.000279891	0.00133996
ENSMUSG00000007050	829.683	0.559999	0.0724202	7.73264	1.05339e-14	1.66624e-13
ENSMUSG00000007080	1922.41	1.32078	0.0816873	16.1688	8.37435e-59	9.85661e-57
ENSMUSG00000007097	5172.14	-0.723505	0.0696177	-10.3925	2.68101e-25	7.93394e-24
ENSMUSG00000007107	7.30128	0.240528	0.545728	0.440747	0.659396	0.825217
ENSMUSG00000007122	92.2887	1.23866	0.175849	7.04388	1.86964e-12	2.48779e-11
ENSMUSG00000007207	1694.48	-0.724028	0.1174	-6.16717	6.95224e-10	7.22397e-09
ENSMUSG00000007209	0.927334	2.48329	1.92719	1.28856	0.197553	1
ENSMUSG00000007216	479.424	-0.103569	0.103117	-1.00438	0.315195	0.531669
ENSMUSG00000007279	151.152	-2.20273	0.181384	-12.144	6.17035e-34	2.72654e-32
ENSMUSG00000007338	1352.47	0.272908	0.0805417	3.38841	0.000702988	0.00311965
ENSMUSG00000007379	89.407	-0.059158	0.174853	-0.33833	0.735114	0.873253
ENSMUSG00000007411	4677.68	0.0782045	0.0687977	1.13673	0.255651	0.461344
ENSMUSG00000007415	1538.11	0.184818	0.121858	1.51667	0.12935	0.28005
ENSMUSG00000007440	55.9486	-0.596837	0.211295	-2.82466	0.00473313	0.0171364
ENSMUSG00000007457	0.545772	1.55468	2.95375	0.526341	0.598651	1
ENSMUSG00000007458	1953.71	0.0997297	0.052601	1.89597	0.0579647	0.148519
ENSMUSG00000007476	573.376	-0.0600238	0.132313	-0.453649	0.650081	0.818576
ENSMUSG00000007480	54.8978	0.617393	0.22945	2.69075	0.00712916	0.0245776
ENSMUSG00000007564	14175.6	-0.183548	0.0809153	-2.2684	0.0233051	0.0692045
ENSMUSG00000007570	496.668	0.0256434	0.128471	0.199605	0.84179	0.930624
ENSMUSG00000007589	965.948	0.593995	0.09094	6.53173	6.50147e-11	7.45237e-10
ENSMUSG00000007591	49.4583	0.311308	0.224033	1.38956	0.164661	0.335475
ENSMUSG00000007594	38.6188	-1.22066	0.253118	-4.82248	1.41782e-06	9.84626e-06
ENSMUSG00000007603	2362.13	-0.291129	0.130906	-2.22395	0.0261521	0.0764143
ENSMUSG00000007610	572.862	0.0837301	0.127616	0.656112	0.511752	0.718189
ENSMUSG00000007613	4753.96	-0.00926527	0.120901	-0.0766354	0.938914	0.974918
ENSMUSG00000007617	1575.55	0.212535	0.118766	1.78953	0.0735302	0.179436
ENSMUSG00000007646	311.92	0.800346	0.154226	5.18944	2.10928e-07	1.62022e-06
ENSMUSG00000007653	1152.33	-1.42424	0.14565	-9.77852	1.39236e-22	3.58031e-21
ENSMUSG00000007655	708.194	1.05989	0.102834	10.3068	6.56171e-25	1.90268e-23
ENSMUSG00000007656	4620.04	0.151379	0.0914126	1.656	0.0977222	0.22524
ENSMUSG00000007659	3383.86	-0.0752473	0.0678622	-1.10883	0.267505	0.47595
ENSMUSG00000007670	6661.68	0.271051	0.129685	2.09008	0.036611	0.101434
ENSMUSG00000007682	24.1673	2.11928	0.368919	5.74456	9.21608e-09	8.36457e-08
ENSMUSG00000007721	1358.28	0.13391	0.153074	0.874805	0.38168	0.604257
ENSMUSG00000007739	6894.91	0.265074	0.0938335	2.82494	0.00472895	0.0171247
ENSMUSG00000007777	429.163	0.046245	0.0849017	0.544689	0.585967	0.774204
ENSMUSG00000007783	2380.04	-0.0684915	0.066861	-1.02439	0.305653	0.521142
ENSMUSG00000007805	5.10269	-0.0902029	0.684875	-0.131707	0.895216	0.95589
ENSMUSG00000007812	1227.44	0.225153	0.0977992	2.3022	0.0213241	0.0640967
ENSMUSG00000007815	4583.21	0.172558	0.0556467	3.10095	0.00192902	0.00773683
ENSMUSG00000007817	18310.1	-0.32886	0.0992318	-3.31406	0.00091953	0.00397435
ENSMUSG00000007827	4121.73	0.169262	0.568688	0.297636	0.765981	0.888753
ENSMUSG00000007833	753.649	0.301812	0.111932	2.69638	0.00700978	0.0242371
ENSMUSG00000007836	12410.8	0.193283	0.201915	0.957251	0.338441	0.558439
ENSMUSG00000007837	243.239	0.140952	0.137521	1.02495	0.305388	0.520839
ENSMUSG00000007850	37326.3	0.409167	0.0616779	6.63393	3.26865e-11	3.84895e-10
ENSMUSG00000007867	495.545	0.485464	0.121459	3.99693	6.4168e-05	0.000342945
ENSMUSG00000007872	797.943	-0.938861	0.187975	-4.9946	5.89571e-07	4.30281e-06
ENSMUSG00000007877	14.9318	0.11225	0.458867	0.244624	0.806748	0.910783
ENSMUSG00000007880	15176.1	0.0746807	0.0890612	0.838532	0.401732	0.623723
ENSMUSG00000007888	19.1067	-0.322894	0.37138	-0.869443	0.384605	0.607402
ENSMUSG00000007891	2424.56	-0.330835	0.105014	-3.1504	0.00163047	0.00665641
ENSMUSG00000007892	8808.7	0.463367	0.174868	2.64981	0.00805365	0.027436
ENSMUSG00000007907	0.259972	1.5562	3.53063	0.440773	0.659377	1
ENSMUSG00000007908	682.192	-0.544836	0.103246	-5.27706	1.31274e-07	1.03445e-06
ENSMUSG00000007944	604.424	-0.186526	0.148744	-1.25401	0.209839	0.401894
ENSMUSG00000007946	24.0964	-4.90736	0.746648	-6.57253	4.94676e-11	5.74143e-10
ENSMUSG00000007950	1918.53	-0.313134	0.173638	-1.80337	0.0713301	0.175037
ENSMUSG00000007987	933.646	0.0585706	0.0837305	0.699514	0.484231	0.695434
ENSMUSG00000007989	9801.1	0.0318411	0.161791	0.196803	0.843981	0.931704
ENSMUSG00000008028	37.0803	-0.338374	0.256056	-1.32148	0.186341	0.368354
ENSMUSG00000008035	1268.63	0.198338	0.132815	1.49334	0.135348	0.29022
ENSMUSG00000008036	2425.09	-0.0790697	0.126626	-0.624433	0.532343	0.733764
ENSMUSG00000008090	374.003	0.880767	0.117001	7.52787	5.15764e-14	7.81005e-13
ENSMUSG00000008129	100.054	-0.00359141	0.206169	-0.0174198	0.986102	0.994552
ENSMUSG00000008136	112.177	-1.10303	0.15799	-6.98168	2.91675e-12	3.82025e-11
ENSMUSG00000008140	2296.07	-0.0991881	0.130013	-0.762911	0.445516	0.663687
ENSMUSG00000008153	3138.4	-0.975882	0.0836024	-11.6729	1.7537e-31	7.00778e-30
ENSMUSG00000008167	1219.85	-0.363433	0.0715313	-5.08075	3.75953e-07	2.80762e-06
ENSMUSG00000008193	1.99864	0.477374	1.1244	0.424558	0.671159	0.833006
ENSMUSG00000008200	5932.04	0.127657	0.0690369	1.84912	0.0644408	0.161361
ENSMUSG00000008206	2670.75	-0.247374	0.0930145	-2.65952	0.00782532	0.0267461
ENSMUSG00000008226	289.711	0.239029	0.102862	2.3238	0.0201363	0.0609906
ENSMUSG00000008301	1963.9	0.0932918	0.0977166	0.954718	0.33972	0.559801
ENSMUSG00000008305	3584.69	-0.0844424	0.0652388	-1.29436	0.195542	0.381478
ENSMUSG00000008307	158.709	0.254715	0.478085	0.532782	0.594184	0.780659
ENSMUSG00000008318	133.976	-0.101532	0.132625	-0.765559	0.443939	0.662403
ENSMUSG00000008333	1633.13	0.550475	0.102493	5.37086	7.83606e-08	6.35474e-07
ENSMUSG00000008348	3366.96	-0.0593414	0.32325	-0.183577	0.854345	0.936517
ENSMUSG00000008373	2301.84	0.445692	0.0646756	6.8912	5.53255e-12	7.08505e-11
ENSMUSG00000008384	86.1769	0.0868034	0.188584	0.46029	0.645308	0.815294
ENSMUSG00000008393	4980.96	-0.329844	0.0710715	-4.64102	3.46692e-06	2.27618e-05
ENSMUSG00000008398	750.796	0.190757	0.0727564	2.62186	0.00874502	0.0294772
ENSMUSG00000008429	1493.65	0.117012	0.0688619	1.69923	0.0892751	0.20997
ENSMUSG00000008435	1338.39	-0.36978	0.0597908	-6.18456	6.22747e-10	6.49956e-09
ENSMUSG00000008438	28.8766	-0.661025	0.291787	-2.26543	0.023486	0.0696698
ENSMUSG00000008450	206.124	0.153122	0.147051	1.04129	0.297741	0.512139
ENSMUSG00000008461	1.59901	-1.58769	1.25345	-1.26666	0.205278	1
ENSMUSG00000008475	3976.81	0.0181426	0.0675571	0.268552	0.788274	0.900969
ENSMUSG00000008482	19.1189	0.53269	0.339451	1.56927	0.116585	0.258286
ENSMUSG00000008489	6630.13	0.00415751	0.12267	0.0338918	0.972963	0.989393
ENSMUSG00000008496	2513.49	-1.08098	0.169456	-6.37913	1.78099e-10	1.95494e-09
ENSMUSG00000008540	281.826	-1.15598	0.169765	-6.80931	9.80703e-12	1.22223e-10
ENSMUSG00000008575	17662.1	1.99421	0.133249	14.966	1.2238e-50	1.06339e-48
ENSMUSG00000008590	2.59212	-3.96158	1.77697	-2.2294	0.0257871	0.0754283
ENSMUSG00000008601	7.76753	0.635378	0.645277	0.984661	0.324791	0.542904
ENSMUSG00000008604	4220.13	0.181561	0.0738496	2.45853	0.0139507	0.0444111
ENSMUSG00000008658	2675.54	-1.05551	0.0906338	-11.6459	2.40877e-31	9.52257e-30
ENSMUSG00000008668	526.882	0.37846	0.124974	3.02831	0.00245929	0.00961655
ENSMUSG00000008682	720.623	0.302979	0.0767773	3.94621	7.9398e-05	0.000417618
ENSMUSG00000008683	6383.25	0.312093	0.0984388	3.17043	0.00152215	0.00627021
ENSMUSG00000008690	3113.22	0.50688	0.0586203	8.64684	5.29473e-18	1.04978e-16
ENSMUSG00000008730	4953.96	0.0561404	0.112672	0.498263	0.618299	0.797561
ENSMUSG00000008734	1174.6	0.376367	0.0768446	4.89777	9.69323e-07	6.8597e-06
ENSMUSG00000008763	2747.24	-0.128922	0.100608	-1.28143	0.200044	0.387604
ENSMUSG00000008789	108.389	0.710414	3.22748	0.220114	0.825782	0.921991
ENSMUSG00000008813	0.142756	0.86	3.53381	0.243363	0.807724	1
ENSMUSG00000008822	280.96	0.00905224	0.122128	0.0741207	0.940914	0.976045
ENSMUSG00000008843	1.72415	-1.3375	1.48988	-0.89772	0.369335	1
ENSMUSG00000008845	25.9129	-0.957314	0.310325	-3.08488	0.00203634	0.00811415
ENSMUSG00000008855	4145.54	0.0991166	0.107319	0.923573	0.355709	0.577173
ENSMUSG00000008859	4485.54	0.0375187	0.0553349	0.678029	0.497753	0.707089
ENSMUSG00000008874	0.318356	-1.7497	3.49466	-0.500679	0.616597	1
ENSMUSG00000008892	1741.97	-0.107739	0.0966526	-1.11471	0.264975	0.473115
ENSMUSG00000008932	1.58567	-0.102052	1.25718	-0.081175	0.935303	1
ENSMUSG00000008958	3246.37	0.247788	0.108946	2.27441	0.0229413	0.0682493
ENSMUSG00000008976	2593.57	0.450859	0.0759873	5.93334	2.96829e-09	2.8658e-08
ENSMUSG00000008999	738.287	-0.488087	0.133493	-3.65629	0.000255893	0.00123598
ENSMUSG00000009013	5180.1	0.331047	0.0498843	6.6363	3.21656e-11	3.79106e-10
ENSMUSG00000009030	2411.01	0.120206	0.0888832	1.35241	0.176245	0.352981
ENSMUSG00000009035	1953.93	-0.158322	0.0979099	-1.61702	0.105874	0.239473
ENSMUSG00000009047	0	NA	NA	NA	NA	1
ENSMUSG00000009070	5.24549	-0.136533	0.639439	-0.21352	0.830921	0.924943
ENSMUSG00000009073	6584.94	0.0247759	0.0442182	0.560311	0.575267	0.766549
ENSMUSG00000009075	126.021	0.238096	0.150895	1.57789	0.114591	0.254631
ENSMUSG00000009076	190.996	0.321713	0.142446	2.25849	0.023915	0.0707397
ENSMUSG00000009079	16503	0.418878	0.0989985	4.23115	2.32495e-05	0.000133902
ENSMUSG00000009090	3804.05	-0.248843	0.0620896	-4.00781	6.12838e-05	0.000328615
ENSMUSG00000009092	43.9287	0.634969	0.245786	2.58343	0.00978246	0.0325676
ENSMUSG00000009093	0.240769	0.138666	3.53381	0.0392396	0.968699	1
ENSMUSG00000009097	36.431	0.00232166	0.312952	0.00741858	0.994081	0.997935
ENSMUSG00000009108	5.66234	0.35689	0.781159	0.456872	0.647763	0.817008
ENSMUSG00000009112	2492.29	0.347699	0.0707154	4.91688	8.79334e-07	6.25535e-06
ENSMUSG00000009114	1.5678	1.13348	1.41187	0.802824	0.422077	1
ENSMUSG00000009115	2.22772	-1.73833	1.14696	-1.5156	0.12962	0.280469
ENSMUSG00000009145	65.6165	-0.345279	0.200674	-1.7206	0.0853239	0.202454
ENSMUSG00000009185	0	NA	NA	NA	NA	1
ENSMUSG00000009207	1521.97	-0.132676	0.162246	-0.817748	0.413501	0.6342
ENSMUSG00000009210	1.25473	-1.09304	1.45305	-0.752238	0.451908	1
ENSMUSG00000009214	1.0112	-1.43629	1.94148	-0.739787	0.459429	1
ENSMUSG00000009216	134.263	0.114696	0.216774	0.529102	0.596734	0.782426
ENSMUSG00000009246	91.1046	0.174621	0.276068	0.632528	0.527042	0.729525
ENSMUSG00000009248	4.46703	-0.312877	0.73777	-0.424084	0.671505	0.833275
ENSMUSG00000009281	52.8619	-0.12085	0.366353	-0.329872	0.741497	0.876575
ENSMUSG00000009291	1498.58	0.0871765	0.0626467	1.39156	0.164056	0.334573
ENSMUSG00000009292	197.787	-0.799568	0.148702	-5.37698	7.57438e-08	6.16183e-07
ENSMUSG00000009293	1575.32	0.464765	0.0846506	5.49039	4.01045e-08	3.38704e-07
ENSMUSG00000009350	9.2454	-1.5005	0.697966	-2.14981	0.0315699	0.0897138
ENSMUSG00000009356	21.3266	-1.23563	0.352331	-3.50701	0.000453172	0.00208501
ENSMUSG00000009376	173.286	-1.28317	0.17619	-7.2829	3.26715e-13	4.63305e-12
ENSMUSG00000009378	153.088	-0.562521	0.210138	-2.67692	0.00743025	0.0255171
ENSMUSG00000009394	1369.09	0.00937848	0.0677227	0.138484	0.889858	0.953234
ENSMUSG00000009406	2054.83	0.204184	0.0924082	2.20959	0.0271335	0.0788749
ENSMUSG00000009418	10752.6	0.0596661	0.071704	0.832117	0.405343	0.627036
ENSMUSG00000009470	9841.14	0.125971	0.144947	0.86908	0.384803	0.60753
ENSMUSG00000009471	0.875325	-0.203507	1.91957	-0.106017	0.915569	1
ENSMUSG00000009487	14.2311	-1.91834	0.497481	-3.85611	0.000115205	0.000587922
ENSMUSG00000009535	2531.06	0.0944412	0.104233	0.906062	0.364903	0.587173
ENSMUSG00000009545	38.2581	-0.00705931	0.260098	-0.0271409	0.978347	0.99183
ENSMUSG00000009549	2284.47	0.110904	0.0726542	1.52646	0.126896	0.276051
ENSMUSG00000009551	95.2175	-0.342984	0.179351	-1.91236	0.0558302	0.144134
ENSMUSG00000009555	2071.36	-0.0645703	0.0720046	-0.896752	0.369851	0.592278
ENSMUSG00000009563	810.214	0.21037	0.070618	2.97898	0.00289208	0.0111055
ENSMUSG00000009566	536.201	0.0782209	0.127812	0.612001	0.540537	0.740241
ENSMUSG00000009569	1536.04	0.182984	0.130484	1.40235	0.160811	0.329719
ENSMUSG00000009575	17783.3	0.337943	0.11528	2.9315	0.00337326	0.0127198
ENSMUSG00000009580	0	NA	NA	NA	NA	1
ENSMUSG00000009585	233.437	1.37504	0.139014	9.89134	4.5389e-23	1.20668e-21
ENSMUSG00000009588	0.841579	0.595303	1.73615	0.342887	0.731684	1
ENSMUSG00000009596	17.1078	-0.0965355	0.365254	-0.264297	0.791551	0.902269
ENSMUSG00000009614	177.578	-0.735794	0.166743	-4.41275	1.02067e-05	6.23774e-05
ENSMUSG00000009621	3087.49	-0.240355	0.0638345	-3.76528	0.000166364	0.000829225
ENSMUSG00000009628	279.962	-0.395088	0.175778	-2.24765	0.0245984	0.0724548
ENSMUSG00000009630	2486.71	0.0712459	0.0707231	1.00739	0.313746	0.530505
ENSMUSG00000009633	30.841	-0.671403	0.273899	-2.45127	0.0142352	0.0451446
ENSMUSG00000009640	951.643	0.0414062	0.0766559	0.540156	0.589089	0.776792
ENSMUSG00000009646	0.117216	0.86	3.53381	0.243363	0.807724	1
ENSMUSG00000009647	757.681	0.00751897	0.106203	0.0707979	0.943559	0.977418
ENSMUSG00000009654	5.46803	-0.439238	0.640365	-0.685917	0.492765	0.70252
ENSMUSG00000009670	3.82387	-0.758271	0.865362	-0.876247	0.380896	0.603458
ENSMUSG00000009681	4889.35	-0.348292	0.0858769	-4.05571	4.99814e-05	0.000272927
ENSMUSG00000009687	199.344	-0.171014	0.22043	-0.77582	0.437855	0.657189
ENSMUSG00000009731	302.851	-0.104082	0.144458	-0.720504	0.471215	0.684255
ENSMUSG00000009733	1669.7	-0.177311	0.0741553	-2.39108	0.0167989	0.0520554
ENSMUSG00000009734	419.697	-2.94959	0.24069	-12.2547	1.58447e-34	7.19794e-33
ENSMUSG00000009739	5959.51	-0.015087	0.0993583	-0.151845	0.879309	0.948148
ENSMUSG00000009741	6375.01	0.0151516	0.065923	0.229838	0.818218	0.918313
ENSMUSG00000009772	1101.75	-0.799072	0.101162	-7.89897	2.81226e-15	4.60598e-14
ENSMUSG00000009828	3726.65	-0.336659	0.0589983	-5.70625	1.15493e-08	1.03875e-07
ENSMUSG00000009863	2942.85	0.195037	0.0745261	2.61702	0.00887001	0.0298557
ENSMUSG00000009876	22.6825	-0.106781	0.311874	-0.342386	0.73206	0.871178
ENSMUSG00000009894	4676.48	-0.555397	0.0788276	-7.04572	1.8451e-12	2.45893e-11
ENSMUSG00000009900	67.8594	0.835896	0.277137	3.01618	0.00255983	0.00996006
ENSMUSG00000009905	736.303	-0.0622692	0.106289	-0.585848	0.557977	0.753509
ENSMUSG00000009907	1887.52	0.401638	0.083041	4.83663	1.32062e-06	9.20984e-06
ENSMUSG00000009927	1792.29	0.363411	0.0797623	4.55618	5.20924e-06	3.3281e-05
ENSMUSG00000009941	7.86902	-0.15555	0.594264	-0.261753	0.793512	0.903297
ENSMUSG00000009995	1644.94	-0.0477628	0.0608344	-0.785128	0.432378	0.651764
ENSMUSG00000010021	55.6009	-0.750119	0.33425	-2.24418	0.0248207	0.0730431
ENSMUSG00000010025	1049.09	0.0268662	0.0845516	0.317749	0.750675	0.881619
ENSMUSG00000010044	122.842	0.248097	0.203556	1.21882	0.222914	0.41967
ENSMUSG00000010045	815.461	-0.169159	0.0993803	-1.70214	0.0887301	0.208909
ENSMUSG00000010047	1290.09	0.0365942	0.101782	0.359535	0.719195	0.862487
ENSMUSG00000010048	325.367	0.252665	0.125925	2.00647	0.0448063	0.12003
ENSMUSG00000010051	176.699	0.257445	0.144533	1.78122	0.0748773	0.18202
ENSMUSG00000010054	1257.64	-0.195846	0.10449	-1.87431	0.0608875	0.154451
ENSMUSG00000010057	1026.72	-0.0165751	0.0981061	-0.168951	0.865835	0.942173
ENSMUSG00000010064	1105.02	-0.331216	0.0800821	-4.13595	3.53487e-05	0.000197565
ENSMUSG00000010066	4545.77	-0.926798	0.106016	-8.74204	2.2893e-18	4.66398e-17
ENSMUSG00000010067	295.425	0.202541	0.108171	1.87241	0.0611505	0.154844
ENSMUSG00000010080	26.3324	-0.688507	0.411963	-1.67128	0.0946658	0.220122
ENSMUSG00000010086	997.938	-0.351195	0.127889	-2.74609	0.00603101	0.021227
ENSMUSG00000010095	3262.73	0.0667955	0.0820938	0.813649	0.415846	0.636365
ENSMUSG00000010097	8148.05	0.137727	0.0767815	1.79376	0.0728523	0.178117
ENSMUSG00000010110	2860.31	0.138158	0.0635807	2.17295	0.0297841	0.0853414
ENSMUSG00000010122	2.05481	-0.727497	1.01388	-0.717539	0.473042	0.685824
ENSMUSG00000010136	37.2521	0.354597	0.45691	0.776077	0.437704	0.657
ENSMUSG00000010142	29.543	-0.660757	0.314925	-2.09814	0.0358926	0.0997642
ENSMUSG00000010154	897.149	-0.689123	0.125334	-5.49828	3.83523e-08	3.24647e-07
ENSMUSG00000010175	1397.73	0.536785	0.126401	4.24668	2.16963e-05	0.000125796
ENSMUSG00000010205	1.43811	-0.907331	1.45258	-0.624632	0.532213	1
ENSMUSG00000010277	7275.71	0.181532	0.0644223	2.81784	0.00483481	0.0174436
ENSMUSG00000010290	1696.9	-0.0284524	0.100578	-0.282889	0.777262	0.894826
ENSMUSG00000010307	316.334	-0.0481513	0.145195	-0.331632	0.740167	0.876275
ENSMUSG00000010311	127.409	-0.353871	0.246313	-1.43667	0.150811	0.314445
ENSMUSG00000010342	16.3763	-0.480961	0.427074	-1.12618	0.260091	0.467143
ENSMUSG00000010358	34.809	-0.267601	0.278449	-0.961042	0.336531	0.556494
ENSMUSG00000010362	220.757	1.23624	0.152551	8.10375	5.3291e-16	9.16888e-15
ENSMUSG00000010376	2302.76	0.292895	0.0600885	4.8744	1.09141e-06	7.67754e-06
ENSMUSG00000010392	1725.64	0.0773472	0.0669962	1.1545	0.248294	0.451981
ENSMUSG00000010406	866.772	0.120169	0.377738	0.318128	0.750388	0.881537
ENSMUSG00000010435	0.106119	-0.582673	3.53381	-0.164885	0.869034	1
ENSMUSG00000010453	3214.15	-0.0740656	0.0503034	-1.47238	0.140919	0.298801
ENSMUSG00000010461	344.626	1.38509	0.195369	7.08963	1.34467e-12	1.81632e-11
ENSMUSG00000010476	10774	-4.57805	0.0812192	-56.3666	0	0
ENSMUSG00000010492	51.4755	-0.0390845	0.236443	-0.165302	0.868706	0.943466
ENSMUSG00000010505	5644.41	0.167477	0.051707	3.23897	0.00119964	0.00505841
ENSMUSG00000010517	2058.69	-0.0249205	0.0981999	-0.253773	0.799671	0.906756
ENSMUSG00000010529	6.33479	-0.395894	0.636405	-0.622079	0.53389	0.735113
ENSMUSG00000010538	50.2832	0.163838	0.322496	0.508032	0.611431	0.792571
ENSMUSG00000010554	1760.15	-0.000296776	0.061267	-0.00484398	0.996135	0.998526
ENSMUSG00000010592	19.4562	-0.362767	0.526548	-0.688954	0.490852	0.701281
ENSMUSG00000010601	0.128474	0.86	3.53381	0.243363	0.807724	1
ENSMUSG00000010607	261.948	0.119088	0.203069	0.58644	0.55758	0.753194
ENSMUSG00000010608	11136.9	0.249786	0.0822837	3.03567	0.00239999	0.00941168
ENSMUSG00000010609	256.277	-0.387477	0.106733	-3.63033	0.000283054	0.00135379
ENSMUSG00000010651	29.9072	-0.590923	0.343628	-1.71966	0.0854946	0.202766
ENSMUSG00000010660	518.913	-0.911728	0.111448	-8.18077	2.82042e-16	4.95468e-15
ENSMUSG00000010663	6510.65	0.0366776	0.0525326	0.698188	0.48506	0.696027
ENSMUSG00000010721	947.09	-0.460986	0.106677	-4.32132	1.55101e-05	9.20088e-05
ENSMUSG00000010751	182.096	0.134677	0.131534	1.0239	0.305883	0.52141
ENSMUSG00000010755	1664.09	0.178765	0.0596463	2.99709	0.00272571	0.010517
ENSMUSG00000010760	2.08841	-0.699405	1.12027	-0.624315	0.532421	0.733814
ENSMUSG00000010796	0.234593	0.138666	3.53381	0.0392396	0.968699	1
ENSMUSG00000010797	2.5942	-1.98301	1.18767	-1.66966	0.0949876	0.220672
ENSMUSG00000010803	555.065	-2.19198	0.143604	-15.2641	1.3269e-52	1.24488e-50
ENSMUSG00000010825	52.2692	-0.0662908	0.22868	-0.289885	0.771904	0.891829
ENSMUSG00000010830	116.817	-0.0337711	0.151975	-0.222216	0.824146	0.921296
ENSMUSG00000010841	0.591743	-1.55538	2.36892	-0.656577	0.511453	1
ENSMUSG00000010911	404.376	0.19775	0.0967363	2.04422	0.0409319	0.111391
ENSMUSG00000010914	1236.74	-0.0392217	0.0797496	-0.491811	0.622853	0.800854
ENSMUSG00000010936	1729.19	0.0420615	0.0720836	0.583509	0.55955	0.75489
ENSMUSG00000011008	6.00195	-0.229525	0.707823	-0.324269	0.745734	0.879213
ENSMUSG00000011034	2.09303	-1.10889	1.25381	-0.88442	0.376469	0.599047
ENSMUSG00000011096	1602.52	0.285888	0.189434	1.50917	0.131255	0.283203
ENSMUSG00000011114	1436.97	0.182977	0.0688588	2.65727	0.00787757	0.0268892
ENSMUSG00000011118	0.285512	1.65522	3.52527	0.469531	0.63869	1
ENSMUSG00000011148	37.3142	-0.0988068	0.304587	-0.324396	0.745638	0.87921
ENSMUSG00000011154	11.0126	0.360968	0.582006	0.620215	0.535117	0.736038
ENSMUSG00000011158	1831.22	0.224855	0.0579245	3.88186	0.00010366	0.000533207
ENSMUSG00000011171	129.194	0.446589	0.151578	2.94626	0.00321638	0.0121958
ENSMUSG00000011179	3139.03	0.71838	0.0749458	9.58533	9.21649e-22	2.25143e-20
ENSMUSG00000011254	545.336	0.188098	0.120586	1.55987	0.118791	0.262053
ENSMUSG00000011256	1772.59	-0.174126	0.0909652	-1.9142	0.0555941	0.143596
ENSMUSG00000011257	1333.86	0.230967	0.0959344	2.40755	0.0160598	0.050139
ENSMUSG00000011263	35.7529	0.55441	0.292521	1.89528	0.058055	0.148707
ENSMUSG00000011267	18.6595	-0.0722093	0.379904	-0.190073	0.849252	0.933856
ENSMUSG00000011305	18.6828	-0.669968	0.383102	-1.7488	0.0803254	0.192581
ENSMUSG00000011306	1963.4	-0.0298003	0.0779968	-0.38207	0.702409	0.851893
ENSMUSG00000011349	2.09982	2.28229	1.30593	1.74763	0.0805277	0.192965
ENSMUSG00000011350	0	NA	NA	NA	NA	1
ENSMUSG00000011382	235.773	-0.233662	0.149456	-1.56342	0.117953	0.260693
ENSMUSG00000011427	1041.71	-0.0440749	0.0829264	-0.531494	0.595076	0.781277
ENSMUSG00000011463	0.968419	-2.41975	1.9321	-1.25239	0.210427	1
ENSMUSG00000011486	3.383	-0.783427	1.11024	-0.705637	0.480414	0.691728
ENSMUSG00000011589	1543.53	-0.51695	0.101494	-5.09343	3.51639e-07	2.63617e-06
ENSMUSG00000011632	0.743955	-0.828022	2.02458	-0.408984	0.682551	1
ENSMUSG00000011658	537.669	0.049435	0.129397	0.38204	0.702431	0.851893
ENSMUSG00000011751	1395.94	-1.05368	0.149075	-7.06809	1.57082e-12	2.10859e-11
ENSMUSG00000011752	471.998	0.3744	0.107366	3.48712	0.000488249	0.00223488
ENSMUSG00000011831	1852.94	0.202749	0.0941829	2.15272	0.0313409	0.0891704
ENSMUSG00000011832	3865.33	-0.515033	0.0765547	-6.72765	1.72428e-11	2.09867e-10
ENSMUSG00000011837	839.712	0.103314	0.0854322	1.20931	0.226544	0.424621
ENSMUSG00000011877	4428.97	-0.0457424	0.103633	-0.441387	0.658933	0.824869
ENSMUSG00000011884	692.243	0.234135	0.10039	2.33225	0.0196877	0.0597859
ENSMUSG00000011958	2505.75	0.336486	0.05893	5.70992	1.13027e-08	1.01834e-07
ENSMUSG00000011960	3292	0.192488	0.105413	1.82605	0.0678434	0.168254
ENSMUSG00000012017	213.775	-0.335718	0.32226	-1.04176	0.297523	0.511999
ENSMUSG00000012042	0.466355	-1.14872	2.20766	-0.520333	0.602832	1
ENSMUSG00000012076	1826.47	0.145978	0.0623496	2.34128	0.0192179	0.058517
ENSMUSG00000012114	2332.41	0.0263509	0.106226	0.248065	0.804084	0.909251
ENSMUSG00000012117	1529.56	0.307178	0.0565154	5.43531	5.47027e-08	4.53562e-07
ENSMUSG00000012123	11.642	-1.38811	0.477565	-2.90664	0.0036533	0.0136309
ENSMUSG00000012126	378.673	-0.314898	0.121284	-2.59637	0.00942134	0.031512
ENSMUSG00000012187	1.8511	-0.772047	1.37964	-0.5596	0.575752	0.766936
ENSMUSG00000012211	1.42219	-2.14295	1.47169	-1.45611	0.145362	1
ENSMUSG00000012282	0.987069	-1.41954	1.72401	-0.823395	0.410283	1
ENSMUSG00000012296	1372.73	0.391413	0.122691	3.19025	0.00142152	0.00589223
ENSMUSG00000012350	4.81484	-0.528654	0.67773	-0.780037	0.435369	0.654943
ENSMUSG00000012396	3.89221	1.00852	0.769759	1.31017	0.190137	0.373693
ENSMUSG00000012405	2279.43	-0.196062	0.146558	-1.33778	0.18097	0.360131
ENSMUSG00000012422	2850.42	0.143732	0.125092	1.14901	0.250551	0.455032
ENSMUSG00000012428	11.6561	0.366712	0.64953	0.56458	0.572359	0.764421
ENSMUSG00000012429	569.114	0.0236015	0.0916323	0.257568	0.796741	0.905006
ENSMUSG00000012443	2696.35	1.82588	0.111981	16.3052	9.06116e-60	1.11199e-57
ENSMUSG00000012483	626.077	0.472783	0.154107	3.0679	0.00215571	0.0085443
ENSMUSG00000012519	7.13658	0.334664	0.653919	0.511782	0.608803	0.79055
ENSMUSG00000012520	225.538	-9.17311	0.969122	-9.46538	2.92503e-21	7.02603e-20
ENSMUSG00000012535	4764.07	0.328162	0.0613664	5.34758	8.91367e-08	7.16803e-07
ENSMUSG00000012609	996.263	0.266999	0.0882235	3.02639	0.0024749	0.00967177
ENSMUSG00000012640	1125.7	-0.197358	0.0801915	-2.46109	0.0138517	0.04415
ENSMUSG00000012705	2.39405	0.0789784	1.15683	0.0682714	0.94557	0.978053
ENSMUSG00000012777	10.5253	-0.571694	0.498897	-1.14592	0.251829	0.456597
ENSMUSG00000012819	285.906	-1.27099	0.188251	-6.7516	1.46222e-11	1.78681e-10
ENSMUSG00000012848	10372.5	0.22519	0.0789305	2.85302	0.00433063	0.0158565
ENSMUSG00000012889	16.9106	-0.853368	0.451761	-1.88898	0.0588943	0.15044
ENSMUSG00000013033	15074	-0.273475	0.08934	-3.06106	0.00220556	0.00872187
ENSMUSG00000013076	3244.29	0.355847	0.0586167	6.07075	1.27316e-09	1.28078e-08
ENSMUSG00000013083	0	NA	NA	NA	NA	1
ENSMUSG00000013089	800.698	0.264073	0.142026	1.85933	0.062981	0.158549
ENSMUSG00000013091	9.81071	0.1993	0.486068	0.410026	0.681787	0.839277
ENSMUSG00000013150	1698.53	-0.43355	0.0585012	-7.41096	1.25385e-13	1.82708e-12
ENSMUSG00000013155	358.16	0.581107	0.159918	3.63379	0.000279293	0.00133852
ENSMUSG00000013158	35.5363	-0.639336	0.273892	-2.33426	0.0195819	0.0595065
ENSMUSG00000013160	3549.08	-0.351893	0.0460679	-7.63857	2.1965e-14	3.41189e-13
ENSMUSG00000013236	34268.2	0.335182	0.127074	2.63769	0.00834717	0.0283353
ENSMUSG00000013275	1511.7	0.00042946	0.0834436	0.00514671	0.995894	0.9984
ENSMUSG00000013338	1.75895	0.163906	1.16483	0.140713	0.888097	0.952371
ENSMUSG00000013353	0.670292	-0.816088	2.37505	-0.343608	0.731141	1
ENSMUSG00000013367	3588.61	-0.852029	0.136244	-6.25371	4.00806e-10	4.26046e-09
ENSMUSG00000013415	3154.79	0.798669	0.13644	5.85364	4.80915e-09	4.51516e-08
ENSMUSG00000013418	5.37139	0.708947	0.716884	0.988928	0.322698	0.540488
ENSMUSG00000013419	1271.74	-0.129896	0.1178	-1.10269	0.270163	0.479171
ENSMUSG00000013465	2171.61	-0.165723	0.0566301	-2.92641	0.00342901	0.0128981
ENSMUSG00000013483	4.86513	-0.578609	0.683424	-0.846633	0.397199	0.619735
ENSMUSG00000013495	630.536	0.176074	0.0805494	2.18591	0.0288219	0.0830439
ENSMUSG00000013523	397.802	-2.50726	0.171723	-14.6007	2.78174e-48	2.27225e-46
ENSMUSG00000013539	655.239	0.0597425	0.0869519	0.687075	0.492035	0.702048
ENSMUSG00000013562	0.251032	-1.36595	3.52666	-0.387321	0.698519	1
ENSMUSG00000013584	267.512	-0.684483	0.127686	-5.36066	8.29163e-08	6.69484e-07
ENSMUSG00000013593	3544.52	0.0495411	0.0520555	0.951697	0.341251	0.561397
ENSMUSG00000013611	4.36175	-1.64589	0.816007	-2.01701	0.0436944	0.117477
ENSMUSG00000013622	855.049	-0.143196	0.102487	-1.39721	0.16235	0.331898
ENSMUSG00000013629	2784.28	0.485887	0.108691	4.47036	7.80876e-06	4.86526e-05
ENSMUSG00000013643	0.318356	-1.7497	3.49466	-0.500679	0.616597	1
ENSMUSG00000013646	1633.42	-0.0552008	0.0894385	-0.617193	0.537107	0.737616
ENSMUSG00000013653	0	NA	NA	NA	NA	1
ENSMUSG00000013662	3895.41	0.011973	0.0885844	0.135159	0.892486	0.954526
ENSMUSG00000013663	3817.5	-0.0406583	0.158486	-0.256542	0.797532	0.905418
ENSMUSG00000013668	0	NA	NA	NA	NA	1
ENSMUSG00000013698	12294.7	0.25854	0.0872986	2.96156	0.00306086	0.0116779
ENSMUSG00000013701	106.438	0.434736	0.324698	1.33889	0.180605	0.359642
ENSMUSG00000013707	26.8811	-0.814933	0.308977	-2.63752	0.00835155	0.0283465
ENSMUSG00000013736	1560.81	0.206438	0.0845431	2.44181	0.0146137	0.0462261
ENSMUSG00000013766	26.0902	4.93549	0.658136	7.4992	6.42104e-14	9.65543e-13
ENSMUSG00000013787	8146.37	0.004542	0.111235	0.0408325	0.967429	0.987212
ENSMUSG00000013822	1280.8	0.223757	0.0730234	3.06418	0.00218268	0.0086446
ENSMUSG00000013833	1768.87	-0.250212	0.160979	-1.55431	0.12011	0.264376
ENSMUSG00000013846	1509.88	0.926618	0.0947134	9.78339	1.32689e-22	3.41535e-21
ENSMUSG00000013858	3037.78	-0.196944	0.18345	-1.07356	0.283022	0.494973
ENSMUSG00000013878	543.684	-0.0341261	0.0972194	-0.351022	0.725572	0.866569
ENSMUSG00000013921	11451.9	0.32153	0.11252	2.85753	0.00426954	0.0156639
ENSMUSG00000013928	6.70553	0.186966	0.691551	0.270357	0.786885	0.900142
ENSMUSG00000013936	2.41582	-0.446261	1.04958	-0.42518	0.670705	0.832724
ENSMUSG00000013973	415.699	0.129701	0.101172	1.28199	0.199846	0.387306
ENSMUSG00000013974	4.88632	0.075935	0.6876	0.110435	0.912065	0.963147
ENSMUSG00000013997	1177.15	0.0889028	0.082699	1.07502	0.282368	0.494195
ENSMUSG00000014030	2193.7	-7.05237	0.198893	-35.4581	2.17477e-275	5.63135e-272
ENSMUSG00000014039	1510.31	0.36778	0.0576019	6.38486	1.71558e-10	1.88554e-09
ENSMUSG00000014074	1820.64	0.584844	0.105669	5.53468	3.11802e-08	2.6655e-07
ENSMUSG00000014075	446.981	0.15394	0.0933242	1.64952	0.099042	0.227499
ENSMUSG00000014077	1625.88	0.331137	0.0807076	4.10293	4.07956e-05	0.00022596
ENSMUSG00000014104	0	NA	NA	NA	NA	1
ENSMUSG00000014158	26.9973	-0.462662	0.301017	-1.537	0.124294	0.271737
ENSMUSG00000014164	822.283	-0.562791	0.0997033	-5.64466	1.65506e-08	1.45918e-07
ENSMUSG00000014177	593.827	0.0086296	0.113674	0.0759155	0.939486	0.975306
ENSMUSG00000014195	7380.79	0.115585	0.0935985	1.2349	0.216868	0.41176
ENSMUSG00000014198	13.9761	-0.843028	0.435673	-1.935	0.0529902	0.137847
ENSMUSG00000014226	3659.52	0.355021	0.0567785	6.25273	4.03329e-10	4.28376e-09
ENSMUSG00000014232	639.227	0.253863	0.111839	2.2699	0.0232134	0.0689717
ENSMUSG00000014243	63.6531	-0.124197	0.222093	-0.559211	0.576018	0.767072
ENSMUSG00000014245	294.367	-0.00620921	0.121715	-0.0510143	0.959314	0.983509
ENSMUSG00000014294	765.605	0.259806	0.102871	2.52556	0.0115515	0.037667
ENSMUSG00000014301	204.431	-0.0489923	0.115517	-0.424115	0.671482	0.833275
ENSMUSG00000014303	1470.41	-0.0487373	0.0939814	-0.518584	0.604051	0.787577
ENSMUSG00000014313	1857.69	0.0153152	0.077161	0.198483	0.842667	0.930968
ENSMUSG00000014329	584.83	-0.618134	0.101936	-6.06394	1.32826e-09	1.33104e-08
ENSMUSG00000014349	2804.86	-0.06979	0.0677018	-1.03084	0.302614	0.518075
ENSMUSG00000014351	0.263124	1.60948	3.52812	0.456186	0.648256	1
ENSMUSG00000014353	1743.7	-0.0236859	0.091528	-0.258783	0.795803	0.904587
ENSMUSG00000014355	7633.61	0.313298	0.108482	2.88801	0.00387684	0.0143862
ENSMUSG00000014361	120.764	-0.396175	0.164072	-2.41464	0.0157508	0.0493288
ENSMUSG00000014402	3364.48	0.183931	0.0564596	3.25774	0.00112301	0.00476553
ENSMUSG00000014418	1457.9	0.285544	0.0698262	4.08935	4.32583e-05	0.000238732
ENSMUSG00000014426	2114.25	0.0605106	0.0878076	0.689127	0.490743	0.701209
ENSMUSG00000014444	628.324	-0.00166666	0.126861	-0.0131378	0.989518	0.996115
ENSMUSG00000014453	0.142756	0.86	3.53381	0.243363	0.807724	1
ENSMUSG00000014470	703.669	-0.105506	0.103036	-1.02398	0.305844	0.521399
ENSMUSG00000014496	2670.67	0.231832	0.127212	1.82241	0.0683925	0.169291
ENSMUSG00000014498	5787.42	0.00985624	0.109423	0.0900744	0.928228	0.97109
ENSMUSG00000014503	410.954	-0.0122207	0.155062	-0.078812	0.937182	0.974203
ENSMUSG00000014504	1152.47	0.191483	0.0744647	2.57146	0.010127	0.0335188
ENSMUSG00000014529	0.26026	0.138666	3.53381	0.0392396	0.968699	1
ENSMUSG00000014542	0.259972	1.5562	3.53063	0.440773	0.659377	1
ENSMUSG00000014543	0.391631	0.926559	3.21658	0.288058	0.773303	1
ENSMUSG00000014547	1775.48	0.0739296	0.0869904	0.849859	0.395403	0.617973
ENSMUSG00000014550	2076.02	0.111302	0.0667968	1.66628	0.0956584	0.221852
ENSMUSG00000014551	665.814	0.183876	0.114927	1.59994	0.109611	0.246079
ENSMUSG00000014554	678.36	-0.0815472	0.0751565	-1.08503	0.277907	0.488768
ENSMUSG00000014592	6160.94	-0.276176	0.0570462	-4.84126	1.29015e-06	9.00221e-06
ENSMUSG00000014599	504.731	-0.00674752	0.0900592	-0.0749231	0.940276	0.97566
ENSMUSG00000014601	6846.99	-0.176686	0.0524311	-3.36987	0.000752044	0.00331745
ENSMUSG00000014602	22848.3	-0.42359	0.0809884	-5.23026	1.69273e-07	1.31351e-06
ENSMUSG00000014603	41.9512	3.18125	0.342232	9.29561	1.46369e-20	3.39917e-19
ENSMUSG00000014606	1966.3	0.0438718	0.0765248	0.573302	0.566441	0.759943
ENSMUSG00000014609	2.96181	-0.873686	1.01343	-0.862111	0.388627	0.610695
ENSMUSG00000014633	223.443	0.576177	0.124539	4.62647	3.71947e-06	2.43028e-05
ENSMUSG00000014668	3268.82	-0.0720803	0.0567938	-1.26916	0.204384	0.393699
ENSMUSG00000014686	49.2044	-1.35377	0.24847	-5.44842	5.08198e-08	4.23536e-07
ENSMUSG00000014704	76.6987	-8.91849	1.7284	-5.15997	2.46995e-07	1.88608e-06
ENSMUSG00000014725	1.16318	-1.83275	1.6343	-1.12143	0.262106	1
ENSMUSG00000014747	92.5991	-0.0809118	0.164311	-0.492431	0.622415	0.800636
ENSMUSG00000014748	1557.41	0.262251	0.0641394	4.08877	4.33664e-05	0.000239277
ENSMUSG00000014763	2596.01	0.0511032	0.0645104	0.792169	0.428262	0.647648
ENSMUSG00000014767	2080.18	0.298618	0.0690839	4.32255	1.54237e-05	9.15385e-05
ENSMUSG00000014769	3309.03	0.190639	0.0862788	2.20957	0.0271348	0.0788749
ENSMUSG00000014771	0	NA	NA	NA	NA	1
ENSMUSG00000014773	2415.24	0.675062	0.116683	5.78542	7.23302e-09	6.64863e-08
ENSMUSG00000014776	71.3091	-0.472189	0.207939	-2.27081	0.0231587	0.0688327
ENSMUSG00000014778	592.562	-0.0433329	0.100115	-0.432833	0.665136	0.829154
ENSMUSG00000014782	383.566	-0.706332	0.11094	-6.36682	1.92988e-10	2.10854e-09
ENSMUSG00000014786	1552.24	0.0276682	0.125175	0.221036	0.825064	0.921746
ENSMUSG00000014791	142.716	0.073094	0.172432	0.423899	0.671639	0.833282
ENSMUSG00000014813	243.292	0.0765223	0.115629	0.661789	0.508106	0.715244
ENSMUSG00000014837	4241.6	-0.545312	0.0978713	-5.57172	2.52238e-08	2.1757e-07
ENSMUSG00000014846	656.825	-1.76726	0.162293	-10.8893	1.29562e-27	4.30113e-26
ENSMUSG00000014850	1271.67	0.394534	0.0847674	4.65431	3.25065e-06	2.14452e-05
ENSMUSG00000014852	1.65141	0.864444	1.4964	0.577683	0.563478	1
ENSMUSG00000014856	649.059	-0.0569709	0.0934915	-0.60937	0.542279	0.741461
ENSMUSG00000014859	1767.98	0.237416	0.0957304	2.48005	0.0131364	0.0421138
ENSMUSG00000014867	3455.33	0.0352904	0.0491291	0.71832	0.47256	0.685401
ENSMUSG00000014873	1178.61	0.138852	0.124102	1.11886	0.263202	0.470998
ENSMUSG00000014905	722.505	-0.112013	0.107572	-1.04129	0.297742	0.512139
ENSMUSG00000014907	426.657	0.263014	0.136059	1.93309	0.053225	0.138333
ENSMUSG00000014932	1316.82	0.331092	0.0724829	4.56787	4.92703e-06	3.16342e-05
ENSMUSG00000014956	8828.92	0.190135	0.121537	1.56441	0.11772	0.260289
ENSMUSG00000014959	2858.22	-0.0015608	0.0717068	-0.0217664	0.982634	0.993271
ENSMUSG00000014980	320.234	0.55138	0.114805	4.80275	1.565e-06	1.07777e-05
ENSMUSG00000015001	4.98877	-0.316725	0.799282	-0.396262	0.691912	0.845314
ENSMUSG00000015002	1377.23	0.0919544	0.0927021	0.991934	0.32123	0.538761
ENSMUSG00000015013	632.049	-0.295494	0.0892177	-3.31205	0.000926135	0.00399955
ENSMUSG00000015016	538.554	-0.210203	0.0990756	-2.12164	0.0338676	0.0949715
ENSMUSG00000015023	1608.08	0.445492	0.0713968	6.23966	4.38511e-10	4.65361e-09
ENSMUSG00000015027	213.062	-0.498996	0.124041	-4.02282	5.75047e-05	0.000310899
ENSMUSG00000015053	510.68	-3.7424	0.146571	-25.533	8.49004e-144	5.78529e-141
ENSMUSG00000015083	127.862	-0.0518907	0.195475	-0.265459	0.790656	0.902049
ENSMUSG00000015085	16.6309	-0.907526	0.616127	-1.47295	0.140764	0.298497
ENSMUSG00000015087	3073.4	0.240724	0.0551141	4.36774	1.2554e-05	7.56514e-05
ENSMUSG00000015090	443.467	-2.56276	0.27326	-9.37847	6.69397e-21	1.58151e-19
ENSMUSG00000015092	1697.06	0.0836496	0.140524	0.595267	0.551665	0.748253
ENSMUSG00000015093	121.54	-0.446443	0.157145	-2.84095	0.00449791	0.016381
ENSMUSG00000015094	6838.93	-0.186948	0.11735	-1.59308	0.111143	0.248762
ENSMUSG00000015095	2587.11	-0.0115693	0.0781819	-0.14798	0.882359	0.949572
ENSMUSG00000015112	341.838	1.22355	0.119477	10.2409	1.30065e-24	3.71735e-23
ENSMUSG00000015120	3297.17	0.427041	0.0704705	6.05985	1.36245e-09	1.36266e-08
ENSMUSG00000015126	635.795	0.198188	0.0913284	2.17006	0.0300024	0.0858528
ENSMUSG00000015127	409.334	-0.134842	0.168757	-0.799031	0.424273	0.644223
ENSMUSG00000015133	280.242	-0.31056	0.131726	-2.35762	0.0183928	0.0563224
ENSMUSG00000015134	111.872	3.60259	0.300565	11.9861	4.20397e-33	1.81429e-31
ENSMUSG00000015143	1335.11	0.659071	0.075451	8.73509	2.43467e-18	4.95234e-17
ENSMUSG00000015149	3071.55	-0.0831228	0.099902	-0.832044	0.405384	0.627062
ENSMUSG00000015165	11850.7	0.31901	0.0541167	5.89485	3.7502e-09	3.5754e-08
ENSMUSG00000015176	3666.23	0.392283	0.0642231	6.10813	1.00807e-09	1.02647e-08
ENSMUSG00000015189	2662.55	-0.171965	0.0928375	-1.85232	0.0639792	0.1605
ENSMUSG00000015202	228.764	0.284635	0.132344	2.15072	0.0314985	0.08955
ENSMUSG00000015214	1556.32	0.116456	0.0843859	1.38005	0.167572	0.340187
ENSMUSG00000015217	4569.74	0.296602	0.125432	2.36464	0.0180478	0.0554104
ENSMUSG00000015222	47504	-0.276733	0.0776046	-3.56593	0.000362566	0.00169678
ENSMUSG00000015224	38.5415	0.140649	0.339127	0.414738	0.678334	0.837175
ENSMUSG00000015242	0	NA	NA	NA	NA	1
ENSMUSG00000015243	3121.44	-0.191562	0.0907624	-2.11059	0.0348074	0.0972699
ENSMUSG00000015247	1077.41	-0.138429	0.084655	-1.63521	0.102005	0.232571
ENSMUSG00000015289	530.551	0.325079	0.0811323	4.00678	6.15534e-05	0.000329924
ENSMUSG00000015290	1479.66	0.345793	0.074039	4.67042	3.00585e-06	1.99266e-05
ENSMUSG00000015291	20564	-0.178422	0.0742041	-2.40447	0.016196	0.0504818
ENSMUSG00000015305	1471.08	-0.999326	0.0951173	-10.5062	8.0847e-26	2.45999e-24
ENSMUSG00000015312	61.6076	0.00237743	0.258462	0.00919838	0.992661	0.997538
ENSMUSG00000015314	2.00217	0.154621	1.02619	0.150674	0.880233	0.948512
ENSMUSG00000015316	4.93994	-0.102215	0.783531	-0.130455	0.896207	0.956324
ENSMUSG00000015335	238.614	0.117928	0.170586	0.691312	0.48937	0.700212
ENSMUSG00000015337	51.9195	-0.695276	0.396365	-1.75413	0.0794077	0.190811
ENSMUSG00000015340	22.5922	-0.470797	0.432987	-1.08732	0.276893	0.487581
ENSMUSG00000015341	2379.01	0.0938655	0.0726472	1.29207	0.196332	0.382356
ENSMUSG00000015342	335.161	0.263346	0.144247	1.82567	0.0679006	0.168348
ENSMUSG00000015354	65.6634	0.274178	0.25588	1.07151	0.28394	0.495875
ENSMUSG00000015355	5.43126	-0.562294	0.682527	-0.823842	0.410029	0.630968
ENSMUSG00000015357	987.423	0.289685	0.119766	2.41876	0.0155733	0.0488439
ENSMUSG00000015363	1177.34	0.0805446	0.0867953	0.927984	0.353416	0.574798
ENSMUSG00000015365	2.63204	-0.640412	1.00371	-0.638044	0.523445	0.72682
ENSMUSG00000015377	3488.38	-1.00673	0.128121	-7.8576	3.91566e-15	6.36485e-14
ENSMUSG00000015396	144.273	-1.8132	0.21132	-8.58037	9.45652e-18	1.83421e-16
ENSMUSG00000015401	6.00534	0.354326	0.875934	0.404512	0.685836	0.841749
ENSMUSG00000015405	10.0817	0.0680632	0.482177	0.141158	0.887745	0.952224
ENSMUSG00000015437	1.1167	-0.190941	1.88641	-0.101219	0.919376	1
ENSMUSG00000015441	49.6148	1.14219	2.68553	0.425312	0.670609	0.832724
ENSMUSG00000015443	0	NA	NA	NA	NA	1
ENSMUSG00000015451	226.533	-0.262421	0.293788	-0.893231	0.371734	0.59425
ENSMUSG00000015452	218.323	0.375924	0.138823	2.70794	0.00677025	0.0235188
ENSMUSG00000015461	2984.61	-0.148025	0.113038	-1.30952	0.190359	0.373987
ENSMUSG00000015467	90.7347	-1.04954e-05	0.180902	-5.8017e-05	0.999954	0.999954
ENSMUSG00000015468	549.906	-0.186388	0.148268	-1.2571	0.208717	0.400187
ENSMUSG00000015474	459.748	-0.0359639	0.0929833	-0.386778	0.698921	0.849585
ENSMUSG00000015476	975.823	-0.511632	0.141605	-3.61308	0.000302576	0.00143839
ENSMUSG00000015478	1510.47	0.0893403	0.139558	0.640167	0.522064	0.725881
ENSMUSG00000015484	272.065	-2.54721	0.121855	-20.9037	4.95991e-97	1.73557e-94
ENSMUSG00000015488	3794.32	0.121931	0.0975581	1.24983	0.211361	0.404119
ENSMUSG00000015501	1995.79	0.56861	0.072974	7.79196	6.59781e-15	1.05917e-13
ENSMUSG00000015519	0.486836	-2.33795	2.93252	-0.797248	0.425307	1
ENSMUSG00000015522	2141.49	0.267167	0.0664607	4.01993	5.82164e-05	0.000314119
ENSMUSG00000015533	268.452	-0.195048	0.165319	-1.17983	0.238069	0.439509
ENSMUSG00000015536	605.597	0.109819	0.0893547	1.22903	0.219062	0.414922
ENSMUSG00000015542	295.02	-0.00312645	0.0970081	-0.0322288	0.97429	0.989998
ENSMUSG00000015568	701.731	1.96038	0.122496	16.0037	1.20495e-57	1.35656e-55
ENSMUSG00000015575	705.472	0.414736	0.102324	4.05316	5.05302e-05	0.000275749
ENSMUSG00000015579	0.338151	-1.82596	3.28402	-0.556016	0.5782	1
ENSMUSG00000015597	4105.38	-0.134529	0.0667042	-2.01679	0.043717	0.117513
ENSMUSG00000015599	4016.02	-0.173847	0.121218	-1.43417	0.151523	0.315599
ENSMUSG00000015605	1069.54	0.0363959	0.158842	0.229132	0.818766	0.91869
ENSMUSG00000015619	1122.6	-6.42418	0.367881	-17.4627	2.75808e-68	4.32834e-66
ENSMUSG00000015627	1.37277	-2.97955	2.1507	-1.38538	0.165935	1
ENSMUSG00000015647	613.712	0.94977	0.161038	5.89779	3.68409e-09	3.5175e-08
ENSMUSG00000015652	21.1705	1.40786	0.360088	3.90978	9.23805e-05	0.000479571
ENSMUSG00000015653	657.258	0.121998	0.145358	0.839292	0.401305	0.62336
ENSMUSG00000015656	6329.44	0.326527	0.13132	2.4865	0.0129006	0.0414913
ENSMUSG00000015659	850.035	-0.114283	0.0748384	-1.52706	0.126746	0.275795
ENSMUSG00000015665	0.26026	0.138666	3.53381	0.0392396	0.968699	1
ENSMUSG00000015668	1286.81	0.255177	0.0991083	2.57473	0.0100318	0.0332561
ENSMUSG00000015671	2827.4	0.267125	0.0685044	3.89939	9.64345e-05	0.000499115
ENSMUSG00000015672	962.693	0.168062	0.072635	2.31378	0.0206796	0.0624244
ENSMUSG00000015697	4891.79	0.264025	0.0510748	5.16938	2.34873e-07	1.79616e-06
ENSMUSG00000015702	32.6076	0.350767	0.360273	0.973614	0.330248	0.549261
ENSMUSG00000015709	12267.6	-0.352602	0.0644002	-5.47517	4.37082e-08	3.6782e-07
ENSMUSG00000015711	1982.34	-0.433014	0.0878498	-4.92903	8.2641e-07	5.90645e-06
ENSMUSG00000015714	2059.23	0.209618	0.0638915	3.28084	0.001035	0.00442908
ENSMUSG00000015721	0.254388	0.138666	3.53381	0.0392396	0.968699	1
ENSMUSG00000015733	4483.52	0.176386	0.119359	1.47777	0.139469	0.296649
ENSMUSG00000015745	2604.43	0.478933	0.102749	4.66118	3.14402e-06	2.07947e-05
ENSMUSG00000015747	991.116	-0.11644	0.0784565	-1.48413	0.137773	0.294014
ENSMUSG00000015748	1741.99	0.405253	0.0927801	4.36789	1.25454e-05	7.56168e-05
ENSMUSG00000015749	8604.76	0.747965	0.0769376	9.72171	2.4365e-22	6.18538e-21
ENSMUSG00000015750	346.919	0.0666627	0.133969	0.497597	0.618768	0.797809
ENSMUSG00000015755	5036.71	0.243478	0.0718352	3.3894	0.000700458	0.00310949
ENSMUSG00000015757	2603.56	0.269349	0.0690309	3.90186	9.54555e-05	0.000494444
ENSMUSG00000015759	1782.73	-0.0714589	0.075682	-0.9442	0.345067	0.565303
ENSMUSG00000015766	350.034	-0.128633	0.114227	-1.12612	0.260113	0.467149
ENSMUSG00000015776	2256.9	0.440162	0.0534573	8.2339	1.81221e-16	3.22068e-15
ENSMUSG00000015787	0	NA	NA	NA	NA	1
ENSMUSG00000015790	727.088	-0.0778966	0.0682988	-1.14053	0.254067	0.459574
ENSMUSG00000015804	1431.9	0.071344	0.146503	0.486979	0.626273	0.80276
ENSMUSG00000015806	809.446	-0.246888	0.0901	-2.74016	0.00614092	0.0215728
ENSMUSG00000015812	48.9254	0.966583	0.292422	3.30544	0.000948267	0.00408832
ENSMUSG00000015829	1161.34	-0.257257	0.0912576	-2.81902	0.00481701	0.0173915
ENSMUSG00000015837	4240.06	-0.291012	0.0579785	-5.0193	5.18596e-07	3.81276e-06
ENSMUSG00000015839	643.114	0.506607	0.0910661	5.56307	2.65065e-08	2.28102e-07
ENSMUSG00000015843	182.123	0.713883	0.153384	4.65422	3.25217e-06	2.14497e-05
ENSMUSG00000015846	1045.9	-0.0318218	0.116636	-0.27283	0.784984	0.899038
ENSMUSG00000015850	32.082	-0.0397977	0.439075	-0.0906399	0.927779	0.97082
ENSMUSG00000015852	240.347	-0.383144	0.130826	-2.92864	0.00340445	0.0128113
ENSMUSG00000015854	0.841044	0.454091	1.95865	0.231839	0.816663	1
ENSMUSG00000015869	2286.11	0.0936462	0.055574	1.68507	0.0919746	0.21512
ENSMUSG00000015879	235.92	0.629504	0.170946	3.68248	0.000230975	0.00112528
ENSMUSG00000015880	1095.97	1.77623	0.137904	12.8802	5.81562e-38	3.04837e-36
ENSMUSG00000015882	2415.31	0.155203	0.117987	1.31542	0.188369	0.371283
ENSMUSG00000015889	1629.44	0.174161	0.0674505	2.58205	0.00982141	0.032659
ENSMUSG00000015890	1.8612	0.697131	1.23766	0.563266	0.573254	0.765181
ENSMUSG00000015932	6113.01	0.220323	0.0655532	3.36098	0.000776653	0.00341263
ENSMUSG00000015937	6946.71	0.468014	0.0589961	7.93296	2.13986e-15	3.54508e-14
ENSMUSG00000015942	1037.61	-0.375316	0.0676131	-5.55094	2.84139e-08	2.43706e-07
ENSMUSG00000015943	200.248	0.30947	0.269391	1.14878	0.250649	0.455076
ENSMUSG00000015944	4387.21	0.0334134	0.0695711	0.480277	0.631031	0.805462
ENSMUSG00000015947	59.6016	-0.245858	0.212702	-1.15588	0.24773	0.451456
ENSMUSG00000015950	110.904	-0.248824	0.173763	-1.43198	0.15215	0.316701
ENSMUSG00000015957	17.5665	-0.89762	0.384641	-2.33366	0.0196137	0.0595961
ENSMUSG00000015961	2557.82	0.156791	0.0958798	1.63529	0.101989	0.232571
ENSMUSG00000015962	3.74176	-1.41032	0.842798	-1.67338	0.0942531	0.21932
ENSMUSG00000015966	24.7319	-0.218715	0.312883	-0.699032	0.484532	0.695712
ENSMUSG00000015968	1572.85	-0.765648	0.10119	-7.56647	3.83517e-14	5.88316e-13
ENSMUSG00000015970	17.3697	-1.11632	0.422016	-2.64522	0.0081638	0.027782
ENSMUSG00000015971	1544.46	0.0591515	0.0658558	0.898197	0.36908	0.59147
ENSMUSG00000015980	248.685	-0.311807	0.150462	-2.07232	0.0382354	0.105114
ENSMUSG00000015981	403.711	-0.609072	0.131223	-4.64149	3.45914e-06	2.27222e-05
ENSMUSG00000015994	1668.33	-0.366944	0.0954508	-3.84433	0.000120882	0.000615316
ENSMUSG00000016018	3217.65	0.346168	0.063344	5.46489	4.63187e-08	3.88145e-07
ENSMUSG00000016024	237.571	-0.433339	0.228273	-1.89834	0.0576517	0.147908
ENSMUSG00000016028	3984.71	1.75496	0.134325	13.065	5.21706e-39	2.88655e-37
ENSMUSG00000016087	279.022	0.065879	0.144554	0.455739	0.648578	0.817518
ENSMUSG00000016128	352.448	-0.290165	0.136418	-2.12703	0.0334178	0.0939953
ENSMUSG00000016150	1047.98	-0.795046	0.161023	-4.93748	7.91399e-07	5.66874e-06
ENSMUSG00000016179	1003.1	-0.236276	0.0814744	-2.9	0.00373162	0.0139071
ENSMUSG00000016181	1207.98	0.296612	0.0715046	4.14815	3.35176e-05	0.00018794
ENSMUSG00000016194	5.2555	2.18331	1.00039	2.18245	0.0290762	0.0836223
ENSMUSG00000016200	1624.77	0.136715	0.106075	1.28885	0.19745	0.383841
ENSMUSG00000016206	13.2153	-0.0659539	0.457541	-0.144149	0.885383	0.951031
ENSMUSG00000016239	83.3394	1.41676	0.272058	5.20755	1.91355e-07	1.47556e-06
ENSMUSG00000016252	1547.04	0.0396099	0.103099	0.384191	0.700837	0.850915
ENSMUSG00000016253	2141.59	0.221513	0.0618529	3.58129	0.000341904	0.00160793
ENSMUSG00000016255	13.9687	0.310479	0.418805	0.741344	0.458485	0.674546
ENSMUSG00000016256	920.38	0.267416	0.0901881	2.9651	0.00302587	0.0115597
ENSMUSG00000016257	1519.25	0.263249	0.0854614	3.08033	0.00206772	0.00822579
ENSMUSG00000016262	1767.01	-0.332293	0.0804144	-4.13226	3.59217e-05	0.000200725
ENSMUSG00000016283	0.729589	1.11114	1.83366	0.605964	0.544538	1
ENSMUSG00000016308	978.122	-0.0146723	0.0888606	-0.165116	0.868852	0.943466
ENSMUSG00000016319	5509.72	0.225834	0.0731127	3.08884	0.00200938	0.00802078
ENSMUSG00000016327	0.357151	-1.89424	3.23793	-0.585017	0.558536	1
ENSMUSG00000016344	1500.13	0.242974	0.179309	1.35506	0.175398	0.351584
ENSMUSG00000016346	8940.43	-0.326407	0.0625839	-5.21551	1.83317e-07	1.4178e-06
ENSMUSG00000016349	2060.62	-0.820432	0.11508	-7.12923	1.00929e-12	1.37189e-11
ENSMUSG00000016356	172.565	-0.782077	0.204153	-3.83084	0.000127705	0.000647629
ENSMUSG00000016382	1214.64	0.32392	0.103219	3.13819	0.00169997	0.00690927
ENSMUSG00000016386	3575.43	0.696755	0.0719219	9.68766	3.40245e-22	8.54539e-21
ENSMUSG00000016409	1337.99	-0.263949	0.140099	-1.88402	0.0595618	0.151785
ENSMUSG00000016427	728.686	-0.0875938	0.153702	-0.569893	0.56875	0.761254
ENSMUSG00000016458	12.0322	0.440802	0.488134	0.903033	0.366508	0.588732
ENSMUSG00000016477	1631.73	0.881206	0.0920044	9.57786	9.90733e-22	2.41791e-20
ENSMUSG00000016481	817.66	0.391651	0.0724166	5.40831	6.36235e-08	5.23171e-07
ENSMUSG00000016487	1208.24	0.249304	0.180696	1.37969	0.167684	0.340282
ENSMUSG00000016493	329.546	0.193458	0.176383	1.09681	0.272726	0.482151
ENSMUSG00000016494	1283.17	0.100134	0.0688308	1.45479	0.145727	0.306113
ENSMUSG00000016495	973.135	0.193012	0.0678815	2.84336	0.00446405	0.016276
ENSMUSG00000016496	51.4175	0.177592	0.237513	0.747715	0.454632	0.671166
ENSMUSG00000016498	1.64368	0.323663	1.36477	0.237156	0.812536	1
ENSMUSG00000016503	298.095	0.170652	0.139017	1.22756	0.219612	0.415659
ENSMUSG00000016510	423.003	-0.0421722	0.123978	-0.34016	0.733736	0.872531
ENSMUSG00000016520	465.613	0.915448	0.119253	7.67654	1.63446e-14	2.56347e-13
ENSMUSG00000016524	0.248875	0.138666	3.53381	0.0392396	0.968699	1
ENSMUSG00000016526	517.749	0.153974	0.0889101	1.7318	0.0833097	0.198548
ENSMUSG00000016528	2306.86	0.154607	0.0761968	2.02905	0.0424536	0.114821
ENSMUSG00000016529	0.243418	-1.33518	3.52811	-0.37844	0.705104	1
ENSMUSG00000016534	2263.72	-0.0444068	0.114037	-0.389408	0.696974	0.848414
ENSMUSG00000016541	9514.17	0.0134079	0.0531807	0.252119	0.800949	0.907609
ENSMUSG00000016552	834.313	0.38278	0.0854441	4.47989	7.46814e-06	4.66763e-05
ENSMUSG00000016554	3187.13	0.283246	0.0698884	4.05283	5.0601e-05	0.000276077
ENSMUSG00000016559	24320.1	0.211771	0.100724	2.10249	0.0355107	0.0989256
ENSMUSG00000016619	3134.15	0.276636	0.082835	3.33961	0.000838972	0.00366223
ENSMUSG00000016624	5088.64	0.317267	0.113348	2.79905	0.0051254	0.0183361
ENSMUSG00000016626	0	NA	NA	NA	NA	1
ENSMUSG00000016637	743.54	0.541819	0.14957	3.62251	0.000291761	0.00139029
ENSMUSG00000016664	1089.1	0.137145	0.0844036	1.62487	0.10419	0.236553
ENSMUSG00000016756	21.894	-1.10802	0.35502	-3.12101	0.0018023	0.0072806
ENSMUSG00000016757	2057.02	0.0454854	0.0793751	0.573044	0.566615	0.760046
ENSMUSG00000016758	7.73966	0.336529	0.536225	0.62759	0.530273	0.732157
ENSMUSG00000016763	2102.35	0.14446	0.129244	1.11773	0.263682	0.4715
ENSMUSG00000016831	3090.52	0.174248	0.0572936	3.04132	0.00235544	0.0092552
ENSMUSG00000016833	436.828	0.164314	0.155694	1.05537	0.291258	0.504235
ENSMUSG00000016918	3841.71	-0.809056	0.11433	-7.07652	1.4782e-12	1.98736e-11
ENSMUSG00000016921	16315.7	0.224324	0.0448056	5.00661	5.53984e-07	4.05451e-06
ENSMUSG00000016933	9063.24	0.17489	0.0719447	2.4309	0.0150614	0.0474684
ENSMUSG00000016940	1180.19	-0.132903	0.121752	-1.09159	0.275012	0.484961
ENSMUSG00000016942	8.58894	-0.272562	0.803402	-0.33926	0.734414	0.872701
ENSMUSG00000016946	1951.23	0.206183	0.0569766	3.61873	0.000296047	0.00140916
ENSMUSG00000016982	0.770003	0.18298	2.00636	0.0911998	0.927334	1
ENSMUSG00000016984	738.306	0.788246	0.137543	5.73092	9.9889e-09	9.0438e-08
ENSMUSG00000016995	30.8027	-0.973123	0.618934	-1.57226	0.115891	0.256902
ENSMUSG00000016998	0	NA	NA	NA	NA	1
ENSMUSG00000017000	0	NA	NA	NA	NA	1
ENSMUSG00000017002	6.37644	0.544952	1.12405	0.484812	0.62781	0.803344
ENSMUSG00000017003	0	NA	NA	NA	NA	1
ENSMUSG00000017004	0.231635	-1.27813	3.53053	-0.362024	0.717334	1
ENSMUSG00000017007	2.32751	-1.80657	1.22634	-1.47314	0.140714	0.298425
ENSMUSG00000017009	116.503	0.0470299	0.180134	0.261083	0.794028	0.903642
ENSMUSG00000017049	0	NA	NA	NA	NA	1
ENSMUSG00000017057	204.598	-0.326604	0.169119	-1.93121	0.0534571	0.138838
ENSMUSG00000017064	0.117504	-0.582673	3.53381	-0.164885	0.869034	1
ENSMUSG00000017119	7876.65	0.260981	0.0629092	4.14854	3.34598e-05	0.000187656
ENSMUSG00000017132	1769.24	-0.0557127	0.0673394	-0.827342	0.408043	0.629558
ENSMUSG00000017144	8691.13	-0.70262	0.0915762	-7.67252	1.68652e-14	2.63871e-13
ENSMUSG00000017146	1015.72	1.62296	0.117185	13.8495	1.28114e-43	8.84639e-42
ENSMUSG00000017165	2.14484	-0.354255	1.1293	-0.313694	0.753754	0.882834
ENSMUSG00000017167	424.884	-1.94643	0.105022	-18.5336	1.10729e-76	2.27556e-74
ENSMUSG00000017176	1785.16	0.174946	0.0970418	1.80279	0.071421	0.175197
ENSMUSG00000017188	939.433	-0.0850503	0.078678	-1.08099	0.279701	0.491222
ENSMUSG00000017195	2.00078	-1.0724	1.2615	-0.850097	0.395271	0.617878
ENSMUSG00000017204	0.732018	-1.9267	2.26936	-0.849008	0.395877	1
ENSMUSG00000017210	4744.36	0.133911	0.0808504	1.65628	0.0976645	0.225214
ENSMUSG00000017211	0.900441	0.511289	1.60279	0.319	0.749727	1
ENSMUSG00000017221	4002.35	0.148738	0.102116	1.45656	0.145238	0.305427
ENSMUSG00000017264	3028.33	0.181795	0.0733792	2.47747	0.0132318	0.0423829
ENSMUSG00000017286	1124.26	0.067506	0.0821224	0.822017	0.411067	0.631702
ENSMUSG00000017288	1822.29	-0.00013877	0.0762627	-0.00181963	0.998548	0.999464
ENSMUSG00000017291	7113.59	0.27366	0.114405	2.39203	0.0167557	0.0519421
ENSMUSG00000017299	895.415	0.25675	0.070826	3.62508	0.000288867	0.00137934
ENSMUSG00000017300	0.92766	-2.33855	1.86817	-1.25179	0.210648	1
ENSMUSG00000017307	243.494	0.00772597	0.118749	0.0650614	0.948125	0.979122
ENSMUSG00000017309	5.99989	0.21411	0.709057	0.301964	0.762679	0.887069
ENSMUSG00000017310	0	NA	NA	NA	NA	1
ENSMUSG00000017311	1.62154	-3.21682	1.85979	-1.72967	0.0836892	1
ENSMUSG00000017314	1991.38	-0.257302	0.117704	-2.18601	0.0288147	0.0830323
ENSMUSG00000017316	0	NA	NA	NA	NA	1
ENSMUSG00000017344	1406.59	-1.25988	0.0610734	-20.629	1.50652e-94	4.87622e-92
ENSMUSG00000017376	3051.5	0.242591	0.0734254	3.3039	0.000953482	0.00410806
ENSMUSG00000017386	3611.67	0.0497074	0.0908781	0.546967	0.584401	0.773083
ENSMUSG00000017390	2679.63	1.29649	0.317631	4.08174	4.46994e-05	0.000245989
ENSMUSG00000017400	337.352	-0.269195	0.0974482	-2.76244	0.00573709	0.0202922
ENSMUSG00000017404	2245.03	0.296111	0.0687015	4.3101	1.63177e-05	9.62705e-05
ENSMUSG00000017405	265.225	0.366637	0.125161	2.92932	0.00339707	0.0127928
ENSMUSG00000017412	1234.7	-0.538407	0.121808	-4.42013	9.86396e-06	6.04538e-05
ENSMUSG00000017417	23.1371	-1.4333	0.358878	-3.99383	6.50156e-05	0.000346902
ENSMUSG00000017418	3264.75	-0.0291499	0.100306	-0.290611	0.771349	0.891552
ENSMUSG00000017421	12265.2	0.288553	0.0720234	4.00637	6.16577e-05	0.000330415
ENSMUSG00000017428	3362.58	0.275702	0.0697697	3.9516	7.76319e-05	0.000409243
ENSMUSG00000017446	157.378	-0.226393	0.151816	-1.49123	0.135902	0.29119
ENSMUSG00000017453	337.046	0.917214	0.130253	7.04177	1.89817e-12	2.52186e-11
ENSMUSG00000017466	2947.92	0.0068904	0.0667447	0.103235	0.917776	0.965782
ENSMUSG00000017478	3465.78	0.472682	0.113492	4.16489	3.11508e-05	0.000175658
ENSMUSG00000017485	19703.1	0.272323	0.0958007	2.8426	0.0044747	0.0163102
ENSMUSG00000017491	95.8958	0.818345	0.171451	4.77304	1.81462e-06	1.24038e-05
ENSMUSG00000017493	2910.53	0.110712	0.0959971	1.15328	0.248794	0.452534
ENSMUSG00000017499	566.334	1.60172	0.0980107	16.3423	4.93401e-60	6.08387e-58
ENSMUSG00000017548	3855.59	0.864051	0.114486	7.54723	4.44609e-14	6.78415e-13
ENSMUSG00000017550	1642.98	1.07008	0.0904486	11.8308	2.70568e-32	1.12098e-30
ENSMUSG00000017561	504.162	0.827086	0.110193	7.50578	6.10639e-14	9.18761e-13
ENSMUSG00000017588	0.564749	-2.565	2.79986	-0.916118	0.359605	1
ENSMUSG00000017607	5.78546	0.543792	0.746734	0.728227	0.466475	0.680309
ENSMUSG00000017615	3102.77	0.319444	0.057955	5.51193	3.54915e-08	3.01515e-07
ENSMUSG00000017631	10364	-0.0980433	0.0573903	-1.70836	0.0875698	0.20659
ENSMUSG00000017639	5659.38	-0.144019	0.0653503	-2.20379	0.0275389	0.0798446
ENSMUSG00000017652	88.8602	-0.630156	0.172838	-3.64594	0.000266417	0.00128322
ENSMUSG00000017664	1213.36	-0.0758482	0.0762862	-0.994258	0.320097	0.537499
ENSMUSG00000017667	2976.84	0.333453	0.107976	3.08822	0.00201358	0.00803259
ENSMUSG00000017670	4018.32	0.0810014	0.0681789	1.18807	0.234805	0.43544
ENSMUSG00000017677	14564.9	-0.268351	0.0653524	-4.10622	4.0219e-05	0.000222909
ENSMUSG00000017679	2188.11	-0.0973506	0.107188	-0.908222	0.363761	0.585866
ENSMUSG00000017686	2460.68	0.0667997	0.103572	0.644957	0.518955	0.723319
ENSMUSG00000017688	1.81883	-0.456432	1.11307	-0.410065	0.681758	0.839277
ENSMUSG00000017692	1897.27	0.935489	0.0707696	13.2188	6.83581e-40	4.00467e-38
ENSMUSG00000017697	98.2418	0.75249	0.19828	3.79509	0.000147592	0.000741798
ENSMUSG00000017707	3851.93	-0.34549	0.0839323	-4.11629	3.85014e-05	0.000213985
ENSMUSG00000017713	87.863	-0.227578	0.212037	-1.07329	0.283139	0.495078
ENSMUSG00000017715	1268.73	0.00870425	0.0689303	0.126276	0.899513	0.95764
ENSMUSG00000017716	1190.38	1.49271	0.0880676	16.9496	1.9371e-64	2.66805e-62
ENSMUSG00000017718	66.8821	0.599963	0.19117	3.13838	0.00169885	0.0069058
ENSMUSG00000017720	10.7122	0.296615	0.472782	0.627383	0.530408	0.732267
ENSMUSG00000017721	2929.18	-0.450434	0.0985716	-4.56962	4.88614e-06	3.13872e-05
ENSMUSG00000017723	43.8766	1.42489	0.28849	4.93915	7.84638e-07	5.62965e-06
ENSMUSG00000017724	184.601	-0.583491	0.187558	-3.11099	0.0018646	0.00750071
ENSMUSG00000017733	0.486549	-1.21046	2.5226	-0.479849	0.631335	1
ENSMUSG00000017734	280.079	-0.902998	0.135685	-6.6551	2.83108e-11	3.35353e-10
ENSMUSG00000017737	346.856	-0.941071	0.131116	-7.17738	7.10575e-13	9.78183e-12
ENSMUSG00000017740	3298.93	-1.55286	0.126154	-12.3092	8.08073e-35	3.71656e-33
ENSMUSG00000017747	179.064	-0.792682	0.134948	-5.87396	4.25504e-09	4.0241e-08
ENSMUSG00000017754	936.358	-0.980443	0.0845031	-11.6024	4.00481e-31	1.56647e-29
ENSMUSG00000017756	1910.64	0.758531	0.0717551	10.5711	4.05683e-26	1.2476e-24
ENSMUSG00000017760	2190.8	-0.123558	0.0709923	-1.74045	0.0817807	0.195516
ENSMUSG00000017764	551.006	-0.155891	0.106079	-1.46957	0.141678	0.299871
ENSMUSG00000017765	373.009	0.435966	0.154624	2.81952	0.00480961	0.0173696
ENSMUSG00000017767	6.50986	-1.20189	0.632994	-1.89873	0.0575998	0.147804
ENSMUSG00000017774	713.518	0.238504	0.0728743	3.27282	0.0010648	0.00454234
ENSMUSG00000017776	5187.43	0.152704	0.119301	1.27999	0.20055	0.388265
ENSMUSG00000017778	181.09	0.0849459	0.152294	0.557775	0.576998	0.767653
ENSMUSG00000017781	4839.69	-0.145214	0.0475181	-3.05598	0.00224325	0.00884793
ENSMUSG00000017801	1000.92	0.0269326	0.0829162	0.324817	0.745319	0.879022
ENSMUSG00000017802	2611.19	-0.0268398	0.0572334	-0.468954	0.639102	0.811181
ENSMUSG00000017817	24.9695	-0.681483	0.328689	-2.07334	0.0381407	0.104871
ENSMUSG00000017830	79.3065	-0.186148	0.198491	-0.937812	0.348341	0.568687
ENSMUSG00000017831	2004.44	-0.00625896	0.0880373	-0.0710944	0.943323	0.97729
ENSMUSG00000017832	5.32348	-0.0337133	0.676955	-0.0498014	0.960281	0.983954
ENSMUSG00000017837	1975.89	-0.18463	0.0755118	-2.44506	0.014483	0.0458631
ENSMUSG00000017843	4036.94	-0.0638678	0.0723051	-0.883309	0.37707	0.599671
ENSMUSG00000017858	1209.93	0.0972889	0.0641766	1.51596	0.129531	0.28037
ENSMUSG00000017861	514.315	1.61155	0.0936595	17.2065	2.3723e-66	3.55077e-64
ENSMUSG00000017868	2.79289	-0.769548	0.936504	-0.821724	0.411234	0.631772
ENSMUSG00000017897	247.16	-0.510967	0.141196	-3.61885	0.000295919	0.00140907
ENSMUSG00000017922	0.60409	0.644272	2.42502	0.265677	0.790488	1
ENSMUSG00000017929	1473.94	-0.30082	0.0982942	-3.0604	0.0022104	0.00873654
ENSMUSG00000017943	2846.71	-0.542299	0.0660997	-8.20426	2.32011e-16	4.10081e-15
ENSMUSG00000017950	1.08148	-0.750514	1.67371	-0.448414	0.653854	1
ENSMUSG00000017969	155.038	-0.289902	0.222304	-1.30408	0.192207	0.376611
ENSMUSG00000017978	388.523	0.0715544	0.15475	0.462388	0.643803	0.814314
ENSMUSG00000017999	1611.34	0.376218	0.0921301	4.08355	4.43532e-05	0.000244202
ENSMUSG00000018001	1548.5	-0.231658	0.0556159	-4.16532	3.1092e-05	0.000175419
ENSMUSG00000018008	221.481	-0.466518	0.128575	-3.62838	0.000285202	0.00136356
ENSMUSG00000018012	1539.82	-1.14433	0.0803308	-14.2452	4.79872e-46	3.58093e-44
ENSMUSG00000018040	1398.94	0.0322492	0.0669482	0.481704	0.630016	0.804936
ENSMUSG00000018042	3122.3	-0.0912338	0.0834773	-1.09292	0.27443	0.484067
ENSMUSG00000018068	2619.39	0.391984	0.0662714	5.91483	3.32217e-09	3.18727e-08
ENSMUSG00000018076	4184.5	0.238378	0.0741465	3.21496	0.00130463	0.00545313
ENSMUSG00000018102	77.8196	1.02737	0.216765	4.73958	2.14159e-06	1.44714e-05
ENSMUSG00000018126	21.3807	0.191765	0.432651	0.443233	0.657597	0.824232
ENSMUSG00000018143	396.411	0.219176	0.121466	1.80441	0.0711663	0.174688
ENSMUSG00000018160	4562.5	0.254518	0.111386	2.285	0.0223127	0.0666396
ENSMUSG00000018166	82.5942	-2.76562	0.838957	-3.29649	0.000979001	0.00421031
ENSMUSG00000018167	1034.26	0.268712	0.103496	2.59636	0.00942171	0.031512
ENSMUSG00000018168	0.983469	0.118133	1.5313	0.077146	0.938507	1
ENSMUSG00000018169	1760.54	1.18542	0.0877516	13.5088	1.38701e-41	8.91198e-40
ENSMUSG00000018171	1090.22	-0.150448	0.0901615	-1.66865	0.0951864	0.220995
ENSMUSG00000018189	754.197	0.444947	0.0918161	4.84607	1.2593e-06	8.80351e-06
ENSMUSG00000018196	1594.74	0.514676	0.0882328	5.83316	5.43864e-09	5.06576e-08
ENSMUSG00000018199	4044.56	0.318153	0.169873	1.87288	0.0610848	0.15478
ENSMUSG00000018209	2525.68	0.301376	0.0710491	4.2418	2.21736e-05	0.000128276
ENSMUSG00000018211	0.13465	0.86	3.53381	0.243363	0.807724	1
ENSMUSG00000018217	414.302	-0.795621	0.116598	-6.8236	8.87885e-12	1.11228e-10
ENSMUSG00000018238	7.18034	-0.34166	0.5759	-0.593263	0.553005	0.749337
ENSMUSG00000018239	248.049	0.348186	0.127221	2.73686	0.00620289	0.0217521
ENSMUSG00000018259	42.9905	0.57427	3.22978	0.177805	0.858876	0.939114
ENSMUSG00000018263	2.379	1.2567	0.972353	1.29243	0.196209	0.382176
ENSMUSG00000018286	3643.97	0.276915	0.104328	2.65427	0.0079479	0.0271079
ENSMUSG00000018287	1383.75	0.14099	0.0834912	1.68868	0.091281	0.213729
ENSMUSG00000018293	5872.36	0.190086	0.0824606	2.30518	0.0211567	0.0636347
ENSMUSG00000018322	884.058	0.318035	0.0714581	4.45065	8.56111e-06	5.3095e-05
ENSMUSG00000018326	12552.5	-0.16188	0.101713	-1.59154	0.111488	0.249367
ENSMUSG00000018334	1022.66	0.405718	0.107662	3.76844	0.000164271	0.000819581
ENSMUSG00000018339	410.335	-0.331274	0.592171	-0.559422	0.575874	0.767022
ENSMUSG00000018340	1668.82	-0.113181	0.0894211	-1.26571	0.205618	0.395416
ENSMUSG00000018341	10.5327	-0.0490415	0.462599	-0.106013	0.915572	0.964751
ENSMUSG00000018347	502.633	0.184918	0.100604	1.83808	0.0660513	0.164645
ENSMUSG00000018362	307.201	1.02289	0.557827	1.8337	0.0666981	0.16597
ENSMUSG00000018363	3187.48	0.0528748	0.0787049	0.671811	0.501704	0.710169
ENSMUSG00000018372	1125.79	0.395769	0.106475	3.71703	0.000201577	0.000991381
ENSMUSG00000018377	5974.15	0.255256	0.0512421	4.98138	6.31331e-07	4.58561e-06
ENSMUSG00000018378	2868.76	-0.134757	0.113843	-1.18371	0.236529	0.437702
ENSMUSG00000018379	19423.6	0.507315	0.075101	6.7551	1.42735e-11	1.74668e-10
ENSMUSG00000018381	15.7969	0.625379	0.404076	1.54768	0.1217	0.267375
ENSMUSG00000018387	103.65	-0.334957	0.176993	-1.89249	0.0584256	0.149375
ENSMUSG00000018395	4958.81	-0.307794	0.0911986	-3.37499	0.000738184	0.00326242
ENSMUSG00000018398	2181.27	0.700915	0.0806321	8.69275	3.53764e-18	7.12315e-17
ENSMUSG00000018401	5617.46	-0.087065	0.0832203	-1.0462	0.295469	0.50921
ENSMUSG00000018405	220.736	0.0577364	0.151223	0.381797	0.702612	0.852031
ENSMUSG00000018411	33563.5	-0.902879	0.0920645	-9.80702	1.05027e-22	2.71684e-21
ENSMUSG00000018412	5722.07	0.0309689	0.0585002	0.529382	0.596541	0.782294
ENSMUSG00000018415	1815.72	0.376256	0.101201	3.71792	0.000200869	0.000988278
ENSMUSG00000018417	4488.37	0.360034	0.0967467	3.72141	0.000198117	0.000975665
ENSMUSG00000018425	2164.56	0.297546	0.076384	3.8954	9.80364e-05	0.0005069
ENSMUSG00000018427	733.838	-0.0687104	0.0937401	-0.732988	0.463566	0.678091
ENSMUSG00000018428	1930.9	-0.0464529	0.0781287	-0.594569	0.552132	0.748548
ENSMUSG00000018433	1749.49	0.159617	0.0807157	1.97752	0.0479825	0.127184
ENSMUSG00000018442	1464.77	0.0920235	0.118506	0.776529	0.437436	0.656751
ENSMUSG00000018446	1815.89	0.285358	0.0876182	3.25683	0.00112664	0.00478013
ENSMUSG00000018449	485.629	0.293034	0.0872441	3.35878	0.000782865	0.0034376
ENSMUSG00000018451	6675.39	-0.233964	0.0580796	-4.02834	5.61721e-05	0.000304102
ENSMUSG00000018459	123.974	-0.234383	0.157614	-1.48707	0.136997	0.292908
ENSMUSG00000018470	249.436	0.110699	0.162945	0.67936	0.49691	0.706007
ENSMUSG00000018474	27254.7	0.492403	0.10774	4.57029	4.87057e-06	3.13027e-05
ENSMUSG00000018476	6568.3	0.0373646	0.144133	0.259238	0.795452	0.904388
ENSMUSG00000018479	7.37416	0.409321	0.598929	0.683421	0.494341	0.703979
ENSMUSG00000018481	4958.51	0.225904	0.0798298	2.82983	0.00465735	0.0168951
ENSMUSG00000018486	16.0049	-3.0397	0.619127	-4.90965	9.12385e-07	6.48156e-06
ENSMUSG00000018500	44.7211	-0.433065	0.312864	-1.38419	0.166299	0.338121
ENSMUSG00000018501	11543.1	0.301643	0.0676383	4.45965	8.2095e-06	5.10065e-05
ENSMUSG00000018507	404.45	-1.07363	0.137456	-7.81071	5.68652e-15	9.16283e-14
ENSMUSG00000018509	1182.42	0.571556	0.085749	6.66546	2.63847e-11	3.13828e-10
ENSMUSG00000018537	5000.97	-0.0318719	0.132491	-0.24056	0.809897	0.912901
ENSMUSG00000018541	1078.77	0.168509	0.0612889	2.74941	0.00597018	0.0210329
ENSMUSG00000018543	25.0231	0.407572	0.301798	1.35048	0.176862	0.353779
ENSMUSG00000018547	6803	-0.180662	0.0906514	-1.99293	0.046269	0.123311
ENSMUSG00000018548	6521.34	0.10807	0.0991245	1.09025	0.275605	0.485841
ENSMUSG00000018554	433.977	-0.21316	0.148185	-1.43847	0.1503	0.313632
ENSMUSG00000018559	1917.56	0.0413046	0.0852952	0.484254	0.628205	0.803495
ENSMUSG00000018565	1753.01	0.101856	0.0732805	1.38995	0.164544	0.335356
ENSMUSG00000018566	225.288	1.41981	0.122492	11.5911	4.5745e-31	1.78392e-29
ENSMUSG00000018567	6219.6	0.115285	0.0878319	1.31256	0.18933	0.372644
ENSMUSG00000018569	3.54284	-1.06811	0.953889	-1.11975	0.262822	0.470535
ENSMUSG00000018570	582.161	0.614994	0.113216	5.43202	5.57197e-08	4.6155e-07
ENSMUSG00000018572	2266.6	0.287219	0.0864742	3.32145	0.00089552	0.00388381
ENSMUSG00000018574	725.83	0.0007961	0.080962	0.00983301	0.992155	0.997411
ENSMUSG00000018581	95.7968	0.0903056	0.276207	0.326949	0.743706	0.878016
ENSMUSG00000018583	7029.97	0.549775	0.084947	6.47198	9.67271e-11	1.09135e-09
ENSMUSG00000018585	572.972	0.122762	0.0882519	1.39104	0.164214	0.334789
ENSMUSG00000018589	1159.7	-0.208123	0.0942552	-2.20808	0.0272386	0.0791068
ENSMUSG00000018593	8741.06	-0.47788	0.0805305	-5.93415	2.95368e-09	2.85276e-08
ENSMUSG00000018595	4.16915	-0.132323	0.792796	-0.166907	0.867443	0.943043
ENSMUSG00000018599	422.877	-0.101554	0.118222	-0.859013	0.390333	0.612378
ENSMUSG00000018604	104.129	-0.599164	0.357106	-1.67783	0.0933799	0.217699
ENSMUSG00000018620	0	NA	NA	NA	NA	1
ENSMUSG00000018623	0	NA	NA	NA	NA	1
ENSMUSG00000018634	176.483	-1.23114	0.14379	-8.5621	1.1083e-17	2.14006e-16
ENSMUSG00000018648	299.429	2.10628	0.160366	13.1342	2.09632e-39	1.1904e-37
ENSMUSG00000018651	1316.66	0.409498	0.0610146	6.71148	1.92667e-11	2.33018e-10
ENSMUSG00000018654	201.285	-0.465543	0.117886	-3.9491	7.84453e-05	0.000413194
ENSMUSG00000018656	0.68729	-2.85044	1.92935	-1.47741	0.139565	1
ENSMUSG00000018659	233.291	-0.212144	0.115633	-1.83462	0.0665616	0.16571
ENSMUSG00000018661	1884.08	0.170855	0.089861	1.90133	0.0572592	0.147047
ENSMUSG00000018666	6102.68	0.485433	0.092472	5.24952	1.52496e-07	1.18902e-06
ENSMUSG00000018669	1599.29	0.176173	0.0795413	2.21486	0.0267698	0.0780078
ENSMUSG00000018672	128.719	-0.559084	0.14701	-3.80303	0.000142936	0.000719934
ENSMUSG00000018677	1915.8	0.121946	0.0910586	1.3392	0.180505	0.359483
ENSMUSG00000018678	796.362	0.0423296	0.137644	0.30753	0.75844	0.885215
ENSMUSG00000018697	972.731	0.211519	0.110518	1.91389	0.0556344	0.143658
ENSMUSG00000018698	2790.01	-3.6908	0.187588	-19.675	3.53249e-86	9.42993e-84
ENSMUSG00000018707	29396	-0.00907068	0.133142	-0.0681281	0.945684	0.978093
ENSMUSG00000018727	166.284	-0.0225472	0.253167	-0.0890605	0.929034	0.971363
ENSMUSG00000018733	605.461	0.168497	0.0917429	1.83662	0.066266	0.165101
ENSMUSG00000018736	1555.16	-0.10279	0.0850499	-1.20858	0.226823	0.424959
ENSMUSG00000018740	94.3066	0.0281309	0.169777	0.165693	0.868399	0.943346
ENSMUSG00000018750	962.666	-0.362205	0.108405	-3.34122	0.000834109	0.00364407
ENSMUSG00000018752	11.0619	-0.647448	0.496667	-1.30358	0.192375	0.376777
ENSMUSG00000018761	1441.05	-0.0285167	0.0916351	-0.311199	0.755649	0.883957
ENSMUSG00000018765	4370.62	0.151882	0.0883179	1.71972	0.0854838	0.202759
ENSMUSG00000018770	3669.4	-0.0598742	0.116219	-0.515184	0.606424	0.789004
ENSMUSG00000018774	352.716	0.102323	0.175966	0.581496	0.560906	0.755794
ENSMUSG00000018776	20.4353	0.606666	0.454742	1.33409	0.182175	0.361787
ENSMUSG00000018796	570.274	-0.608423	0.0947389	-6.4221	1.34405e-10	1.49497e-09
ENSMUSG00000018800	846.095	-0.342521	0.162333	-2.10999	0.0348592	0.097383
ENSMUSG00000018809	387.776	0.300864	0.110354	2.72636	0.00640368	0.0223805
ENSMUSG00000018819	144.938	-0.460971	0.148282	-3.10874	0.00187886	0.00755451
[truncated: 53,472 more rows]

## Sheet: Mus_Ctx14vCb14
ENSEMBL_ID	baseMean	log2FoldChange	lfcSE	stat	pvalue	padj
ENSMUSG00000000001	3245.57	0.191748	0.116481	1.64617	0.0997286	0.230848
ENSMUSG00000000003	0	NA	NA	NA	NA	1
ENSMUSG00000000028	402.896	1.75739	0.157148	11.183	4.93835e-29	2.53537e-27
ENSMUSG00000000031	7103.62	0.0220956	0.334057	0.0661432	0.947264	0.976526
ENSMUSG00000000037	207.62	-0.160122	0.149367	-1.072	0.28372	0.488977
ENSMUSG00000000049	5.13486	0.96659	1.28489	0.752274	0.451886	0.657297
ENSMUSG00000000056	2397.66	-0.0566352	0.0767672	-0.737753	0.460665	0.665059
ENSMUSG00000000058	106.317	0.225354	0.194189	1.16048	0.245852	0.442212
ENSMUSG00000000078	1319.81	-0.432939	0.115255	-3.75637	0.000172397	0.00101579
ENSMUSG00000000085	1625.4	-0.0986104	0.137175	-0.718864	0.472225	0.675222
ENSMUSG00000000088	1072.46	-0.063532	0.177496	-0.357935	0.720392	0.854284
ENSMUSG00000000093	171.873	0.138729	0.17973	0.771873	0.440189	0.64699
ENSMUSG00000000094	8.84582	0.152465	0.56492	0.269888	0.787246	0.893472
ENSMUSG00000000103	0.168239	0.745756	3.53381	0.211035	0.83286	1
ENSMUSG00000000120	435.506	-0.424456	0.200023	-2.12203	0.0338351	0.0993228
ENSMUSG00000000125	245.218	-1.73339	0.274904	-6.30543	2.87402e-10	3.83174e-09
ENSMUSG00000000126	91.0813	-0.239892	0.22366	-1.07257	0.283463	0.488705
ENSMUSG00000000127	746.796	-0.166834	0.118158	-1.41195	0.157964	0.323774
ENSMUSG00000000131	3030.98	0.147524	0.120776	1.22147	0.221908	0.412206
ENSMUSG00000000134	969.157	0.036859	0.102488	0.359643	0.719114	0.853603
ENSMUSG00000000142	1801.56	-0.240842	0.141061	-1.70736	0.0877549	0.209631
ENSMUSG00000000148	653.706	0.206709	0.136492	1.51445	0.129913	0.280688
ENSMUSG00000000149	2103.63	0.279412	0.100542	2.77907	0.00545144	0.0215523
ENSMUSG00000000154	5.83175	0.911339	0.71176	1.2804	0.200404	0.385012
ENSMUSG00000000157	1.07801	-2.72105	1.72457	-1.57781	0.114608	1
ENSMUSG00000000159	3.19734	-0.947901	0.882913	-1.07361	0.282999	1
ENSMUSG00000000167	78.6238	-0.0377595	0.239304	-0.157789	0.874623	0.940804
ENSMUSG00000000168	936.238	-0.136027	0.0908608	-1.49709	0.134369	0.287776
ENSMUSG00000000171	1203.82	-0.0425766	0.119715	-0.35565	0.722103	0.855152
ENSMUSG00000000182	3.51935	-0.952337	0.906338	-1.05075	0.293372	0.499895
ENSMUSG00000000183	0.324687	0.0244222	3.53381	0.00691102	0.994486	1
ENSMUSG00000000184	11080.1	1.92383	0.141509	13.5951	4.28327e-42	4.38786e-40
ENSMUSG00000000194	1672.51	-0.107961	0.0978136	-1.10374	0.269705	0.47186
ENSMUSG00000000197	888.118	-0.988662	0.160148	-6.17342	6.68265e-10	8.60733e-09
ENSMUSG00000000202	327.465	0.396454	0.136497	2.9045	0.00367842	0.0153469
ENSMUSG00000000204	1.49346	-1.76956	1.43445	-1.23361	0.217347	1
ENSMUSG00000000214	176.228	-1.8439	0.232681	-7.92456	2.28948e-15	4.76615e-14
ENSMUSG00000000215	0.743735	-1.17415	2.14126	-0.548348	0.583453	1
ENSMUSG00000000216	0.672804	-0.688757	2.53256	-0.271961	0.785652	1
ENSMUSG00000000223	2446.25	-0.703015	0.0715964	-9.81913	9.31463e-23	3.20554e-21
ENSMUSG00000000244	6.28724	0.100808	0.743038	0.13567	0.892082	0.950516
ENSMUSG00000000247	4148.45	1.19452	0.151537	7.8827	3.20389e-15	6.59491e-14
ENSMUSG00000000248	0.3324	0.0244222	3.53381	0.00691102	0.994486	1
ENSMUSG00000000253	182.299	-0.443678	0.186878	-2.37416	0.0175889	0.0578892
ENSMUSG00000000263	12.6498	-2.83503	0.706917	-4.01042	6.06121e-05	0.000394149
ENSMUSG00000000266	421.974	-1.31057	0.125767	-10.4206	1.99625e-25	8.14213e-24
ENSMUSG00000000275	198.802	0.153139	0.169134	0.905432	0.365237	0.577294
ENSMUSG00000000276	1101.32	-0.313315	0.0879518	-3.56235	0.000367556	0.00200393
ENSMUSG00000000278	404.936	0.54458	0.124668	4.36825	1.25243e-05	9.17049e-05
ENSMUSG00000000282	1593.54	0.287743	0.185137	1.55422	0.120131	0.265412
ENSMUSG00000000290	14.4123	-0.237458	0.493134	-0.481529	0.630141	0.796491
ENSMUSG00000000295	316.73	0.124221	0.123831	1.00315	0.315788	0.525672
ENSMUSG00000000296	85.231	-0.85171	0.299794	-2.84098	0.00449745	0.0182391
ENSMUSG00000000301	27.5248	0.27087	0.348004	0.778352	0.436361	0.643857
ENSMUSG00000000303	129.199	-0.609179	0.641668	-0.949368	0.342434	0.554077
ENSMUSG00000000305	3318.16	0.319936	0.153838	2.07969	0.0375538	0.108065
ENSMUSG00000000308	394.997	-1.32177	0.121141	-10.911	1.02072e-27	4.86608e-26
ENSMUSG00000000317	222.592	0.566604	0.172412	3.28634	0.00101498	0.00494359
ENSMUSG00000000318	19.0454	-0.631081	0.535597	-1.17827	0.238687	0.433709
ENSMUSG00000000320	18.9388	0.384896	0.429361	0.89644	0.370018	0.582251
ENSMUSG00000000325	3437.4	-0.268523	0.104425	-2.57144	0.0101276	0.036436
ENSMUSG00000000326	651.71	0.027096	0.141066	0.192081	0.847679	0.926649
ENSMUSG00000000339	1029.02	-0.229461	0.103533	-2.21631	0.0266702	0.0815057
ENSMUSG00000000340	499.896	0.464488	0.103097	4.50536	6.6259e-06	5.11695e-05
ENSMUSG00000000346	2167.51	0.520785	0.12226	4.25964	2.04753e-05	0.000144356
ENSMUSG00000000355	773.443	-0.6263	0.194387	-3.22192	0.00127336	0.00605217
ENSMUSG00000000359	7.93471	0.134802	0.639653	0.210743	0.833088	0.91877
ENSMUSG00000000365	12.9604	-0.592291	0.526617	-1.12471	0.260712	0.460922
ENSMUSG00000000374	2135.04	-0.00625991	0.0953195	-0.0656729	0.947638	0.976697
ENSMUSG00000000378	599.932	0.177204	0.0935764	1.89368	0.0582672	0.153179
ENSMUSG00000000381	0.254912	1.41267	3.52053	0.401265	0.688225	1
ENSMUSG00000000384	812.971	0.257944	0.113396	2.27472	0.0229227	0.0722382
ENSMUSG00000000385	2.70479	-1.74771	1.21003	-1.44436	0.148639	1
ENSMUSG00000000386	1.65459	-0.604762	1.21616	-0.49727	0.618999	1
ENSMUSG00000000392	25.5764	-0.624459	0.426195	-1.46519	0.142868	0.301521
ENSMUSG00000000394	19.7665	1.87861	0.419216	4.48125	7.4206e-06	5.65924e-05
ENSMUSG00000000399	1279.01	-0.0883522	0.121187	-0.729056	0.465967	0.669817
ENSMUSG00000000402	40.592	-0.425402	0.276218	-1.54009	0.123537	0.270622
ENSMUSG00000000409	126.047	0.033888	0.18649	0.181714	0.855807	0.931466
ENSMUSG00000000411	2.81129	0.145724	1.15919	0.125712	0.89996	1
ENSMUSG00000000416	2499.93	0.749922	0.125815	5.96049	2.51479e-09	3.04498e-08
ENSMUSG00000000420	1589.76	-0.045561	0.114514	-0.397863	0.690731	0.836562
ENSMUSG00000000435	0.0866724	0.745756	3.53381	0.211035	0.83286	1
ENSMUSG00000000439	747.434	0.101278	0.0970932	1.0431	0.296903	0.504108
ENSMUSG00000000440	5.38995	-0.930253	0.813394	-1.14367	0.252761	0.451106
ENSMUSG00000000441	2584.5	0.112169	0.0775105	1.44714	0.147857	0.309176
ENSMUSG00000000486	287.391	0.567573	0.128186	4.42774	9.52261e-06	7.13386e-05
ENSMUSG00000000489	220.399	0.16311	0.17153	0.950915	0.341647	0.553537
ENSMUSG00000000530	216.399	-0.0330587	0.19118	-0.17292	0.862715	0.934321
ENSMUSG00000000531	127.525	0.53507	0.206651	2.58924	0.00961874	0.0348729
ENSMUSG00000000532	2876.07	-0.100503	0.0793804	-1.26609	0.20548	0.391665
ENSMUSG00000000538	2273.36	-0.224432	0.122559	-1.83121	0.0670694	0.170992
ENSMUSG00000000544	2.10124	-0.553969	1.15877	-0.478068	0.632602	1
ENSMUSG00000000552	1054.46	-0.129431	0.184845	-0.700214	0.483794	0.685906
ENSMUSG00000000555	379.127	0.152159	0.187019	0.813602	0.415873	0.625379
ENSMUSG00000000560	1172.32	-0.113207	0.0994376	-1.13848	0.254921	0.453748
ENSMUSG00000000561	1131.92	-0.30763	0.159275	-1.93144	0.0534282	0.143034
ENSMUSG00000000562	2.57501	0.0114319	1.08795	0.0105077	0.991616	1
ENSMUSG00000000563	3729.57	-0.147661	0.107875	-1.36881	0.171057	0.343409
ENSMUSG00000000567	1779.26	0.757701	0.174479	4.34265	1.40773e-05	0.000102092
ENSMUSG00000000568	8410.59	0.0804245	0.128577	0.625497	0.531645	0.724303
ENSMUSG00000000579	106.985	0.182757	0.301268	0.606625	0.5441	0.734196
ENSMUSG00000000581	1162.81	-0.93143	0.202626	-4.5968	4.29028e-06	3.42244e-05
ENSMUSG00000000594	391.965	-0.0323374	0.150852	-0.214365	0.830263	0.917492
ENSMUSG00000000600	1779.56	0.0809929	0.120441	0.672471	0.501284	0.700157
ENSMUSG00000000605	4218.89	-0.336629	0.0787085	-4.2769	1.89512e-05	0.000134515
ENSMUSG00000000606	0.168239	0.745756	3.53381	0.211035	0.83286	1
ENSMUSG00000000617	5.45896	0.310572	0.685059	0.453351	0.650296	0.810845
ENSMUSG00000000627	568.747	-0.738836	0.117989	-6.2619	3.80308e-10	5.00974e-09
ENSMUSG00000000628	367.883	1.47924	0.146763	10.0791	6.83434e-24	2.51296e-22
ENSMUSG00000000631	4779.75	-0.093039	0.0869745	-1.06973	0.284742	0.490263
ENSMUSG00000000632	8092.82	1.15432	0.182845	6.31315	2.73415e-10	3.65855e-09
ENSMUSG00000000673	11.2817	-0.25767	0.501918	-0.51337	0.607692	0.780335
ENSMUSG00000000682	5.80184	-0.0499558	0.70447	-0.0709126	0.943467	0.974803
ENSMUSG00000000686	10.1831	0.632458	0.54003	1.17115	0.241538	0.43713
ENSMUSG00000000690	0.89683	-2.42209	2.73864	-0.884412	0.376474	1
ENSMUSG00000000693	183.5	0.0112835	0.136649	0.0825729	0.934191	0.970544
ENSMUSG00000000701	0	NA	NA	NA	NA	1
ENSMUSG00000000706	2.52017	-0.368734	1.03304	-0.356942	0.721135	1
ENSMUSG00000000708	673.68	0.134052	0.106393	1.25997	0.207679	0.394779
ENSMUSG00000000711	2047.79	0.052246	0.0789974	0.661363	0.50838	0.705833
ENSMUSG00000000724	2.06758	-0.440697	1.14711	-0.38418	0.700845	1
ENSMUSG00000000730	0.511868	-0.292014	2.73751	-0.106671	0.91505	1
ENSMUSG00000000731	13.0852	0.232934	0.49287	0.472608	0.636493	0.800432
ENSMUSG00000000732	23.4528	0.291013	0.369372	0.787859	0.430779	0.638401
ENSMUSG00000000738	1288.49	-0.168138	0.0904211	-1.8595	0.0629562	0.162939
ENSMUSG00000000739	10.7756	0.418183	0.507662	0.823743	0.410086	0.619828
ENSMUSG00000000740	422.13	0.3329	0.143254	2.32386	0.0201333	0.0648961
ENSMUSG00000000743	1470.06	-0.0952957	0.0872481	-1.09224	0.274728	0.478105
ENSMUSG00000000751	1576.45	0.764849	0.0764897	9.99937	1.53363e-23	5.53141e-22
ENSMUSG00000000753	257.15	0.145781	0.300927	0.484441	0.628073	0.794979
ENSMUSG00000000759	1787.11	0.321443	0.0770857	4.16994	3.04682e-05	0.000208923
ENSMUSG00000000766	26.8532	1.17089	0.383325	3.05456	0.00225388	0.0100144
ENSMUSG00000000776	788.922	0.118784	0.0938519	1.26565	0.205638	0.391831
ENSMUSG00000000782	223.799	0.449487	0.232087	1.93672	0.0527799	0.141748
ENSMUSG00000000787	11923.4	0.045242	0.122496	0.369335	0.711878	0.850139
ENSMUSG00000000791	3.53013	0.573373	0.849813	0.674705	0.499863	0.698738
ENSMUSG00000000792	34.1483	-0.0265454	0.279514	-0.0949699	0.924339	0.966556
ENSMUSG00000000794	748.834	0.402569	0.154262	2.60965	0.00906345	0.033215
ENSMUSG00000000804	2781.89	-0.36535	0.100865	-3.62216	0.000292155	0.00163111
ENSMUSG00000000805	68.1245	-1.32087	0.419931	-3.14545	0.0016583	0.00763781
ENSMUSG00000000811	304.142	-0.689257	0.137865	-4.99952	5.74738e-07	5.19799e-06
ENSMUSG00000000817	15.0103	-1.25835	0.48917	-2.57242	0.0100991	0.0363573
ENSMUSG00000000823	5371.74	-0.110775	0.0973377	-1.13805	0.255101	0.453918
ENSMUSG00000000826	6020.48	-0.373191	0.0900143	-4.14591	3.38472e-05	0.000230372
ENSMUSG00000000827	1328.34	0.309074	0.0960528	3.21775	0.001292	0.00612754
ENSMUSG00000000838	2471.39	0.163481	0.129475	1.26265	0.206716	0.393545
ENSMUSG00000000861	5949.09	1.20076	0.12597	9.53211	1.54113e-21	4.94081e-20
ENSMUSG00000000869	244.225	-0.767594	0.161456	-4.75419	1.99246e-06	1.66669e-05
ENSMUSG00000000876	260.52	0.173072	0.173643	0.996711	0.318905	0.528548
ENSMUSG00000000881	2877.78	-0.142157	0.0862831	-1.64757	0.0994413	0.230309
ENSMUSG00000000884	121.355	-0.0100156	0.214527	-0.0466871	0.962763	0.982935
ENSMUSG00000000889	27.9872	-7.51848	1.06659	-7.04907	1.80115e-12	2.9429e-11
ENSMUSG00000000901	410.991	0.325614	0.125001	2.60489	0.00919035	0.033613
ENSMUSG00000000902	3013.79	0.108135	0.0832636	1.2987	0.194046	0.375988
ENSMUSG00000000903	3.17498	-1.09689	0.986508	-1.11189	0.266185	1
ENSMUSG00000000915	1415.92	0.0553783	0.117206	0.472487	0.636579	0.800494
ENSMUSG00000000916	421.788	0.197972	0.11699	1.69221	0.0906051	0.214555
ENSMUSG00000000934	246.898	-0.468124	0.172855	-2.70819	0.00676503	0.0259808
ENSMUSG00000000938	0.463502	-2.34022	2.66436	-0.878341	0.379759	1
ENSMUSG00000000942	1.72081	-4.23398	2.05485	-2.06048	0.0393526	1
ENSMUSG00000000948	603.998	-0.246799	0.1547	-1.59533	0.110637	0.249697
ENSMUSG00000000957	1855.38	0.397639	0.124096	3.20429	0.00135396	0.00638908
ENSMUSG00000000958	128.96	0.07774	0.165722	0.4691	0.638998	0.802071
ENSMUSG00000000959	1469.58	0.315728	0.112462	2.80742	0.004994	0.0199588
ENSMUSG00000000976	1682.86	0.19639	0.0973034	2.01833	0.0435574	0.121803
ENSMUSG00000000982	9.52563	0.073289	0.588838	0.124464	0.900948	0.955157
ENSMUSG00000000983	0	NA	NA	NA	NA	1
ENSMUSG00000001014	0	NA	NA	NA	NA	1
ENSMUSG00000001016	5400.39	0.248374	0.109913	2.25973	0.0238379	0.0745853
ENSMUSG00000001017	4597.47	0.180173	0.0950861	1.89484	0.0581137	0.152903
ENSMUSG00000001018	740.319	-0.0018468	0.0988996	-0.0186735	0.985102	0.99281
ENSMUSG00000001020	1.20675	1.81936	1.75421	1.03714	0.299672	1
ENSMUSG00000001021	0.1123	0.745756	3.53381	0.211035	0.83286	1
ENSMUSG00000001023	0	NA	NA	NA	NA	1
ENSMUSG00000001025	64.982	-0.124297	0.367583	-0.338147	0.735253	0.862257
ENSMUSG00000001027	4.61057	0.986965	1.22216	0.807558	0.419345	0.628347
ENSMUSG00000001029	82.9742	0.330522	0.231272	1.42915	0.152961	0.316707
ENSMUSG00000001034	2108.09	0.536239	0.117853	4.55006	5.36295e-06	4.20502e-05
ENSMUSG00000001036	1981.11	-0.157297	0.0800962	-1.96385	0.0495476	0.135043
ENSMUSG00000001039	352.66	0.144621	0.12161	1.18922	0.234351	0.428059
ENSMUSG00000001052	2534.65	0.0328814	0.154901	0.212274	0.831893	0.918398
ENSMUSG00000001053	167.331	-0.0761966	0.18034	-0.422517	0.672648	0.824985
ENSMUSG00000001054	734.624	-0.168641	0.114004	-1.47925	0.139073	0.295575
ENSMUSG00000001056	550.111	0.210332	0.113376	1.85517	0.0635722	0.164148
ENSMUSG00000001062	1382.5	-0.185586	0.120261	-1.5432	0.122783	0.269379
ENSMUSG00000001065	730.392	0.129784	0.112179	1.15693	0.2473	0.444201
ENSMUSG00000001076	228.399	-6.41933	0.600767	-10.6852	1.19371e-26	5.25828e-25
ENSMUSG00000001082	620.527	0.635164	0.149211	4.25683	2.07348e-05	0.000145999
ENSMUSG00000001089	1498.81	0.620026	0.131787	4.70474	2.54191e-06	2.09605e-05
ENSMUSG00000001095	1.49015	-4.04872	2.39013	-1.69393	0.0902782	1
ENSMUSG00000001098	1115.07	0.0408748	0.0940624	0.43455	0.663889	0.819444
ENSMUSG00000001100	2029.54	0.271895	0.0997339	2.72621	0.00640671	0.024808
ENSMUSG00000001103	4.35119	1.0421	0.852975	1.22173	0.221812	0.412131
ENSMUSG00000001105	677.181	-0.264109	0.147994	-1.78459	0.074328	0.185189
ENSMUSG00000001119	676.645	-0.400094	0.433083	-0.923828	0.355576	0.567299
ENSMUSG00000001120	817.459	0.0238697	0.107273	0.222514	0.823914	0.914053
ENSMUSG00000001123	78.0044	0.0921672	0.237494	0.388082	0.697955	0.841082
ENSMUSG00000001127	3294.28	-0.395739	0.1167	-3.39109	0.000696155	0.00351912
ENSMUSG00000001128	533.713	0.00538019	0.152092	0.0353746	0.971781	0.987473
ENSMUSG00000001131	33.7395	0.157823	0.349405	0.451691	0.651492	0.811506
ENSMUSG00000001134	135.434	0.418047	0.230659	1.8124	0.0699239	0.176392
ENSMUSG00000001138	905.224	0.187144	0.130502	1.43403	0.151564	0.314538
ENSMUSG00000001143	1200.94	-0.0876336	0.0900382	-0.973294	0.330407	0.541315
ENSMUSG00000001150	2481.83	0.0703281	0.0805828	0.872743	0.382803	0.594251
ENSMUSG00000001151	1639.34	0.662868	0.115752	5.72663	1.02446e-08	1.17031e-07
ENSMUSG00000001155	1.71818	0.605999	1.51857	0.399058	0.68985	1
ENSMUSG00000001156	931.904	-0.191542	0.0809982	-2.36477	0.0180414	0.059149
ENSMUSG00000001157	1088.78	0.153917	0.137124	1.12246	0.261667	0.461958
ENSMUSG00000001158	791.684	0.48167	0.1596	3.01799	0.00254457	0.0111464
ENSMUSG00000001166	11.6118	0.129236	0.510591	0.25311	0.800183	0.90015
ENSMUSG00000001168	0.427654	-2.23726	2.71332	-0.824547	0.409629	1
ENSMUSG00000001173	1997.88	-0.237179	0.066817	-3.54968	0.000385701	0.00209186
ENSMUSG00000001175	14307.5	-0.208032	0.0640044	-3.25027	0.00115295	0.00554813
ENSMUSG00000001211	2266.72	0.119026	0.0963301	1.2356	0.216607	0.405714
ENSMUSG00000001225	2.42506	1.81441	1.25958	1.44049	0.149729	1
ENSMUSG00000001227	1009.05	-0.493933	0.178636	-2.76502	0.00569189	0.0224104
ENSMUSG00000001228	1720.6	1.45872	0.101839	14.3238	1.5549e-46	2.05069e-44
ENSMUSG00000001229	1563.73	0.0997452	0.11812	0.844442	0.398423	0.609562
ENSMUSG00000001240	375.123	-0.0156452	0.225496	-0.0693815	0.944686	0.975147
ENSMUSG00000001247	166.365	0.780334	0.185778	4.20036	2.66494e-05	0.000184229
ENSMUSG00000001248	7820.1	-0.00301358	0.0818904	-0.0368002	0.970644	0.986837
ENSMUSG00000001249	5.81292	-0.353121	0.764923	-0.461643	0.644338	0.806291
ENSMUSG00000001260	146.978	-0.987191	0.208469	-4.73542	2.18599e-06	1.81616e-05
ENSMUSG00000001270	6402.74	0.515575	0.134095	3.84486	0.000120622	0.000736537
ENSMUSG00000001280	2589.59	0.478967	0.0893552	5.36026	8.31009e-08	8.45794e-07
ENSMUSG00000001281	5.58719	-0.786008	0.666169	-1.17989	0.238043	0.432832
ENSMUSG00000001285	758.179	0.287226	0.138668	2.07132	0.0383293	0.109679
ENSMUSG00000001288	198.984	0.77598	0.163752	4.73875	2.15041e-06	1.78997e-05
ENSMUSG00000001289	2319.36	-0.177445	0.131969	-1.34459	0.178756	0.35465
ENSMUSG00000001300	3787.8	2.06357	0.114182	18.0727	5.23163e-73	1.88896e-70
ENSMUSG00000001305	422.904	0.212557	0.150178	1.41537	0.15696	0.32244
ENSMUSG00000001313	2268.51	1.11716	0.149774	7.45899	8.71856e-14	1.58699e-12
ENSMUSG00000001323	1097.09	0.109205	0.102907	1.0612	0.2886	0.494526
ENSMUSG00000001333	12.5689	-0.931372	0.468668	-1.98727	0.0468922	0.129291
ENSMUSG00000001334	126.293	-1.22465	0.179881	-6.80814	9.88674e-12	1.51429e-10
ENSMUSG00000001348	11.808	-0.0432477	0.478458	-0.0903896	0.927978	0.96765
ENSMUSG00000001349	6.71617	0.0434318	0.757343	0.0573476	0.954268	0.980312
ENSMUSG00000001366	665.323	-0.355383	0.104626	-3.39669	0.000682071	0.00345673
ENSMUSG00000001376	1262.45	-0.267969	0.117877	-2.27329	0.023009	0.0724271
ENSMUSG00000001380	1733.83	-0.0122331	0.144147	-0.0848657	0.932368	0.969383
ENSMUSG00000001383	2600.33	0.205693	0.11461	1.79473	0.0726971	0.182156
ENSMUSG00000001403	1166.43	2.17038	0.205304	10.5715	4.03813e-26	1.72031e-24
ENSMUSG00000001415	3619.89	0.102453	0.101009	1.0143	0.31044	0.519524
ENSMUSG00000001416	5012.93	0.222324	0.0912355	2.43681	0.0148174	0.0502467
ENSMUSG00000001418	554.832	0.169326	0.153173	1.10546	0.268961	0.471003
ENSMUSG00000001419	1964.55	0.451123	0.169945	2.65453	0.00794194	0.0297283
ENSMUSG00000001420	20.6246	1.18459	0.384832	3.07821	0.00208249	0.00935293
ENSMUSG00000001424	2161.57	0.126284	0.0704918	1.79147	0.0732183	0.18315
ENSMUSG00000001435	1784.42	0.220151	0.164866	1.33533	0.181767	0.358647
ENSMUSG00000001436	453.99	0.214697	0.124648	1.72242	0.084993	0.204923
ENSMUSG00000001440	9359.46	0.36766	0.105377	3.48902	0.000484803	0.00255572
ENSMUSG00000001441	4897.33	-0.178188	0.0782493	-2.27719	0.0227751	0.0718758
ENSMUSG00000001444	5.15277	-0.556092	0.750693	-0.740772	0.458832	0.663569
ENSMUSG00000001445	733.775	0.191045	0.121059	1.57811	0.11454	0.256221
ENSMUSG00000001467	3309.02	-0.26374	0.0871357	-3.02677	0.00247179	0.0108708
ENSMUSG00000001472	8192.9	-0.186461	0.0886682	-2.10291	0.0354739	0.103155
ENSMUSG00000001473	338.934	0.120896	0.20929	0.577647	0.563502	0.749827
ENSMUSG00000001482	1229.53	0.0323485	0.0920922	0.351262	0.725392	0.856742
ENSMUSG00000001493	14.9353	0.0465434	0.484835	0.0959983	0.923522	0.966155
ENSMUSG00000001494	3.38231	0.382712	0.982078	0.389696	0.696761	0.840204
ENSMUSG00000001496	879.752	1.42821	0.140549	10.1616	2.94179e-24	1.11328e-22
ENSMUSG00000001497	0.421354	-2.21954	3.27226	-0.678288	0.497589	1
ENSMUSG00000001504	1046.82	-5.15355	0.754584	-6.82966	8.51157e-12	1.31096e-10
ENSMUSG00000001506	1993.12	0.0131138	0.427457	0.0306786	0.975526	0.988951
ENSMUSG00000001507	717.559	-0.994618	0.130874	-7.59983	2.96517e-14	5.63484e-13
ENSMUSG00000001508	1.41154	0.891908	1.45453	0.613192	0.53975	1
ENSMUSG00000001510	3.96324	-1.54093	0.886491	-1.73823	0.0821695	0.199932
ENSMUSG00000001517	1479.41	2.02946	0.163286	12.4288	1.82288e-35	1.32505e-33
ENSMUSG00000001518	623.379	-0.319565	0.120235	-2.65783	0.0078645	0.0294885
ENSMUSG00000001520	232.909	-0.246746	0.14286	-1.72719	0.0841327	0.203361
ENSMUSG00000001521	778.968	0.246314	0.116828	2.10835	0.0350003	0.102036
ENSMUSG00000001524	198.813	0.238549	0.209363	1.1394	0.254536	0.453388
ENSMUSG00000001525	63251.8	0.113485	0.162548	0.698163	0.485076	0.686884
ENSMUSG00000001542	75.4815	-0.37992	0.237187	-1.60177	0.109205	0.247168
ENSMUSG00000001552	1361.31	-0.507703	0.13321	-3.81129	0.000138246	0.000833069
ENSMUSG00000001555	392.66	0.169549	0.192207	0.882114	0.377715	0.589621
ENSMUSG00000001558	17.6736	-0.31277	0.38449	-0.813465	0.415951	0.625385
ENSMUSG00000001566	0.45899	2.38816	3.1711	0.7531	0.45139	1
ENSMUSG00000001569	843.066	0.341493	0.108302	3.15315	0.00161516	0.00746723
ENSMUSG00000001576	3204.42	0.157602	0.0848294	1.85787	0.0631868	0.163382
ENSMUSG00000001583	5.38154	-0.447662	0.77927	-0.574464	0.565654	0.75157
ENSMUSG00000001588	34.756	-0.0380876	0.31842	-0.119614	0.904789	0.956788
ENSMUSG00000001604	12.9238	0.476162	0.515882	0.923006	0.356004	0.567804
ENSMUSG00000001622	0.383507	-0.962665	2.86613	-0.335876	0.736964	1
ENSMUSG00000001627	880.497	-0.131384	0.12325	-1.066	0.286424	0.492274
ENSMUSG00000001630	324.052	-0.328446	0.155874	-2.10712	0.0351072	0.10232
ENSMUSG00000001632	1720.31	0.484243	0.120776	4.00943	6.08654e-05	0.000395562
ENSMUSG00000001642	187.126	0.256925	0.244845	1.04934	0.294024	0.500725
ENSMUSG00000001655	0.391726	0.0282863	2.52309	0.011211	0.991055	1
ENSMUSG00000001656	0	NA	NA	NA	NA	1
ENSMUSG00000001657	0.483512	-0.077609	2.75209	-0.0282	0.977503	1
ENSMUSG00000001661	0.919655	1.47039	1.8212	0.807377	0.41945	1
ENSMUSG00000001663	52.575	-0.389913	0.27587	-1.41339	0.15754	0.323346
ENSMUSG00000001665	7.18504	0.0983454	0.669774	0.146834	0.883263	0.945281
ENSMUSG00000001666	289.583	-0.0352145	0.173914	-0.202482	0.83954	0.922347
ENSMUSG00000001670	0.725162	-1.84038	2.42964	-0.75747	0.448768	1
ENSMUSG00000001672	22.7583	-0.13515	0.427246	-0.31633	0.751752	0.872539
ENSMUSG00000001674	563.183	0.484395	0.0919663	5.2671	1.38598e-07	1.37259e-06
ENSMUSG00000001687	951.023	0.141653	0.0848487	1.66948	0.0950225	0.222693
ENSMUSG00000001700	160.708	-0.366258	0.20017	-1.82973	0.0672902	0.171456
ENSMUSG00000001707	852.511	-0.256085	0.12097	-2.11693	0.0342655	0.100345
ENSMUSG00000001729	7103.51	0.149052	0.0650273	2.29215	0.0218972	0.0695036
ENSMUSG00000001739	16.1012	0.221032	0.398869	0.554146	0.579479	0.76188
ENSMUSG00000001741	26.183	0.279403	0.41216	0.6779	0.497835	0.697108
ENSMUSG00000001750	264.616	0.202178	0.120728	1.67465	0.0940019	0.220771
ENSMUSG00000001751	161.001	-0.227628	0.210502	-1.08136	0.279536	0.483986
ENSMUSG00000001755	705.551	0.125879	0.0870765	1.44562	0.148284	0.309747
ENSMUSG00000001761	1341.83	0.728433	0.144594	5.03777	4.70977e-07	4.31501e-06
ENSMUSG00000001763	139.25	-0.401232	0.1907	-2.10399	0.0353793	0.102977
ENSMUSG00000001767	1036.24	0.212502	0.123862	1.71564	0.0862284	0.206883
ENSMUSG00000001768	561.958	-0.382372	0.132391	-2.88821	0.00387443	0.0160554
ENSMUSG00000001773	6.99494	0.0404498	0.694685	0.0582276	0.953567	0.979928
ENSMUSG00000001774	2400.45	-0.25621	0.118906	-2.15473	0.0311828	0.0928988
ENSMUSG00000001783	2960.49	-0.0227831	0.0965403	-0.235996	0.813436	0.908055
ENSMUSG00000001785	1131.42	0.225113	0.0933625	2.41118	0.0159012	0.0532577
ENSMUSG00000001786	1410.49	-0.533895	0.0991327	-5.38565	7.21817e-08	7.38755e-07
ENSMUSG00000001794	2555.85	-0.0567011	0.138107	-0.410559	0.681396	0.831243
ENSMUSG00000001802	3415.95	-0.00364364	0.139376	-0.0261426	0.979144	0.990749
ENSMUSG00000001804	0.471215	-2.35819	2.65423	-0.888466	0.37429	1
ENSMUSG00000001815	98.9339	-7.34287	0.667425	-11.0018	3.74607e-28	1.82135e-26
ENSMUSG00000001819	3.76265	-5.35052	1.32694	-4.03222	5.52532e-05	0.00036122
ENSMUSG00000001823	0	NA	NA	NA	NA	1
ENSMUSG00000001827	143.085	0.0149784	0.351403	0.0426245	0.966001	0.984599
ENSMUSG00000001829	906.144	-0.113637	0.0976817	-1.16334	0.244692	0.44093
ENSMUSG00000001833	4708.99	0.134737	0.13024	1.03453	0.300889	0.508523
ENSMUSG00000001844	600.647	0.180033	0.13469	1.33664	0.181339	0.358077
ENSMUSG00000001847	4946.05	0.128505	0.0836875	1.53553	0.124654	0.272479
ENSMUSG00000001855	1693.31	0.5388	0.178132	3.02472	0.00248864	0.0109362
ENSMUSG00000001864	1136.6	1.02291	0.0810747	12.6169	1.70444e-36	1.3126e-34
ENSMUSG00000001865	2.17903	0.88084	1.14435	0.769727	0.441462	1
ENSMUSG00000001870	382.96	1.41689	0.177417	7.98622	1.39143e-15	2.92147e-14
ENSMUSG00000001891	990.613	-0.303992	0.108351	-2.80562	0.00502203	0.0200635
ENSMUSG00000001901	68.1335	-1.39781	0.233803	-5.9786	2.2506e-09	2.73562e-08
ENSMUSG00000001909	1142.14	0.0316989	0.0959598	0.330335	0.741147	0.866074
ENSMUSG00000001910	2830.13	0.577524	0.146254	3.94876	7.85566e-05	0.000499339
ENSMUSG00000001911	5801.61	2.57346	0.190495	13.5093	1.37804e-41	1.37336e-39
ENSMUSG00000001918	307.547	0.213985	0.139342	1.53568	0.124617	0.272479
ENSMUSG00000001924	17450.9	-0.214403	0.107654	-1.9916	0.0464145	0.128153
ENSMUSG00000001930	197.94	-0.128483	0.23653	-0.5432	0.586992	0.766815
ENSMUSG00000001942	268.079	-0.148267	0.125507	-1.18134	0.237466	0.432103
ENSMUSG00000001943	63.8003	0.160383	0.244977	0.654685	0.51267	0.709146
ENSMUSG00000001946	361.104	0.14973	0.155276	0.964285	0.334903	0.546428
ENSMUSG00000001948	115.49	0.171297	0.191413	0.894911	0.370835	0.582653
ENSMUSG00000001962	783.161	-0.00942771	0.165838	-0.0568491	0.954665	0.980408
ENSMUSG00000001964	1165.9	0.715099	0.1595	4.48338	7.34699e-06	5.60698e-05
ENSMUSG00000001983	227.461	0.0611476	0.153683	0.397882	0.690717	0.836562
ENSMUSG00000001985	4546.59	0.678864	0.0997994	6.80228	1.02975e-11	1.57502e-10
ENSMUSG00000001986	948.8	-0.383008	0.108623	-3.52603	0.000421843	0.00226446
ENSMUSG00000001988	104.799	0.0117005	0.241251	0.0484993	0.961318	0.98236
ENSMUSG00000001995	2895.77	0.292076	0.0711611	4.10443	4.05317e-05	0.000271836
ENSMUSG00000001998	774.98	-0.181019	0.123931	-1.46065	0.144112	0.303389
ENSMUSG00000001999	195.543	-0.142248	0.151824	-0.936927	0.348796	0.560911
ENSMUSG00000002006	3765.79	-0.526678	0.121755	-4.32572	1.52037e-05	0.000109611
ENSMUSG00000002007	10.7592	-1.14837	0.555979	-2.06549	0.0388768	0.1108
ENSMUSG00000002010	1882.64	0.169439	0.136606	1.24035	0.214845	0.403716
ENSMUSG00000002012	1163.87	-0.852079	0.17008	-5.00987	5.4468e-07	4.94296e-06
ENSMUSG00000002014	633.818	-0.0141844	0.142316	-0.0996684	0.920608	0.964537
ENSMUSG00000002015	643.441	-0.271979	0.196176	-1.3864	0.165624	0.335435
ENSMUSG00000002017	1329.3	0.281844	0.0891694	3.16077	0.00157353	0.00729315
ENSMUSG00000002020	12.9737	0.875331	0.507217	1.72575	0.0843921	0.203831
ENSMUSG00000002028	9590.73	0.301269	0.135501	2.22337	0.0261909	0.0803307
ENSMUSG00000002031	2053.12	0.266714	0.091474	2.91574	0.00354847	0.0148754
ENSMUSG00000002032	213.513	-0.712918	0.161362	-4.41813	9.95569e-06	7.42044e-05
ENSMUSG00000002033	0.381048	0.760314	3.44109	0.220951	0.82513	1
ENSMUSG00000002043	139.014	0.220626	0.199009	1.10862	0.267595	0.469062
ENSMUSG00000002052	5192.43	0.167318	0.122973	1.36061	0.173637	0.347227
ENSMUSG00000002055	1169.57	1.92252	0.134725	14.27	3.36758e-46	4.38881e-44
ENSMUSG00000002057	0.0866724	0.745756	3.53381	0.211035	0.83286	1
ENSMUSG00000002058	967.62	0.0756558	0.152054	0.497558	0.618796	0.788668
ENSMUSG00000002059	583.206	0.0873971	0.126069	0.69325	0.488153	0.689468
ENSMUSG00000002064	651.984	-0.0572385	0.138021	-0.41471	0.678354	0.828707
ENSMUSG00000002068	216.386	0.970449	0.148824	6.52079	6.99389e-11	9.93809e-10
ENSMUSG00000002076	8.38848	-0.188184	0.574046	-0.32782	0.743047	0.867151
ENSMUSG00000002083	273.207	-0.332403	0.232396	-1.43033	0.152622	0.316169
ENSMUSG00000002100	6.15648	1.22797	0.991852	1.23805	0.215696	0.404695
ENSMUSG00000002102	2853.38	0.154658	0.106909	1.44663	0.148002	0.309391
ENSMUSG00000002103	1876.84	0.044721	0.103089	0.433811	0.664426	0.819619
ENSMUSG00000002104	8.97094	-0.261778	0.707017	-0.370257	0.711191	0.849968
ENSMUSG00000002105	516.513	-0.0967394	0.123354	-0.784243	0.432898	0.640248
ENSMUSG00000002107	11841.5	0.923529	0.111106	8.31212	9.40075e-17	2.14784e-15
ENSMUSG00000002108	41.7314	0.112154	0.303213	0.369885	0.711468	0.849968
ENSMUSG00000002109	212.681	-0.505355	0.157848	-3.20153	0.00136699	0.00644297
ENSMUSG00000002111	42.7875	0.0617928	0.384412	0.160746	0.872293	0.939968
ENSMUSG00000002129	3645.72	0.264442	0.130625	2.02444	0.0429249	0.120344
ENSMUSG00000002147	187.009	0.0716757	0.210974	0.339737	0.734055	0.861672
ENSMUSG00000002190	253.741	-1.02485	0.158796	-6.45388	1.09023e-10	1.51976e-09
ENSMUSG00000002204	67.3611	-1.78844	0.921904	-1.93994	NA	1
ENSMUSG00000002205	524.939	0.447455	0.11101	4.03075	5.56002e-05	0.000363273
ENSMUSG00000002210	648.433	-0.00803267	0.124521	-0.0645085	0.948565	0.977178
ENSMUSG00000002221	1440.44	0.511325	0.110653	4.62097	3.81946e-06	3.07582e-05
ENSMUSG00000002222	1868.54	0.0561603	0.110684	0.507395	0.611877	0.783204
ENSMUSG00000002227	283.903	0.465486	0.183556	2.53593	0.011215	0.0397569
ENSMUSG00000002228	20.2711	1.00072	0.457461	2.18754	0.028703	0.0866123
ENSMUSG00000002233	492.761	0.432103	0.180059	2.39979	0.0164045	0.0546609
ENSMUSG00000002240	0	NA	NA	NA	NA	1
ENSMUSG00000002249	475.519	0.716808	0.140183	5.11339	3.16434e-07	2.97332e-06
ENSMUSG00000002250	446.751	0.436753	0.188372	2.31857	0.0204185	0.0656235
ENSMUSG00000002257	67.5952	-0.224758	0.241545	-0.930502	0.352111	0.564182
ENSMUSG00000002265	10293.5	-0.388347	0.0883095	-4.39757	1.09469e-05	8.1017e-05
ENSMUSG00000002266	805.773	-0.731399	0.169327	-4.31946	1.56414e-05	0.000112326
ENSMUSG00000002274	557.659	0.456037	0.181224	2.51642	0.0118553	0.0416248
ENSMUSG00000002279	328.729	-0.0510207	0.147941	-0.344872	0.730191	0.859657
ENSMUSG00000002280	437.686	0.0592372	0.114586	0.516966	0.60518	0.77825
ENSMUSG00000002289	180.333	0.0987387	0.268443	0.367819	0.713008	0.850557
ENSMUSG00000002297	935.415	1.11719	0.118505	9.42735	4.20565e-21	1.30648e-19
ENSMUSG00000002307	926.088	0.106868	0.120833	0.88442	0.37647	0.588275
ENSMUSG00000002308	266.333	-0.0140381	0.194476	-0.0721842	0.942455	0.974397
ENSMUSG00000002319	803.913	-0.191221	0.0922809	-2.07217	0.0382499	0.109481
ENSMUSG00000002320	648.949	0.278767	0.0985208	2.82953	0.00466169	0.0188047
ENSMUSG00000002324	16.0361	0.776917	0.679596	1.1432	0.252954	0.451306
ENSMUSG00000002325	1073.23	-0.0131465	0.257429	-0.0510683	0.959271	0.982101
ENSMUSG00000002326	216.008	0.374988	0.136125	2.75473	0.00587401	0.023041
ENSMUSG00000002329	816.782	-0.24577	0.110498	-2.22421	0.0261341	0.0802124
ENSMUSG00000002332	584.315	0.205637	0.166897	1.23212	0.217903	0.407274
ENSMUSG00000002341	7891.64	-0.0237039	0.113854	-0.208196	0.835076	0.919945
ENSMUSG00000002342	589.66	0.356103	0.108932	3.26905	0.0010791	0.00522238
ENSMUSG00000002343	792.58	-0.181757	0.12044	-1.5091	0.131272	0.28282
ENSMUSG00000002345	417.718	0.0613541	0.114568	0.535524	0.592287	0.770169
ENSMUSG00000002346	499.825	0.0565683	0.146628	0.385794	0.699649	0.842255
ENSMUSG00000002365	297.965	0.115526	0.149188	0.774365	0.438715	0.646032
ENSMUSG00000002372	2453.22	0.0781842	0.124957	0.625687	0.53152	0.724203
ENSMUSG00000002379	693.453	0.088057	0.269458	0.326793	0.743825	0.867596
ENSMUSG00000002384	15.2719	-0.660589	0.448879	-1.47164	0.141117	0.298656
ENSMUSG00000002393	218.853	0.00886605	0.247901	0.0357644	0.97147	0.987287
ENSMUSG00000002395	789.452	-0.148345	0.116448	-1.27391	0.202696	0.387938
ENSMUSG00000002396	284.953	-0.0180956	0.136443	-0.132625	0.89449	0.95189
ENSMUSG00000002409	1009.76	0.432214	0.16182	2.67096	0.00756349	0.0285641
ENSMUSG00000002413	2921.9	-0.102945	0.103054	-0.998942	0.317823	0.527582
ENSMUSG00000002416	738.134	-0.367828	0.140767	-2.61303	0.0089743	0.0329267
ENSMUSG00000002428	1096	0.213005	0.120283	1.77087	0.0765829	0.189415
ENSMUSG00000002455	2097.49	0.142984	0.0837363	1.70755	0.0877199	0.209593
ENSMUSG00000002458	404.09	0.291799	0.118545	2.4615	0.0138357	0.0473921
ENSMUSG00000002459	289.229	0.598888	0.112436	5.32649	1.00128e-07	1.00884e-06
ENSMUSG00000002475	43.7588	-0.718588	0.291019	-2.46921	0.0135411	0.0465279
ENSMUSG00000002477	1916.43	0.0398788	0.181345	0.219906	0.825945	0.914916
ENSMUSG00000002486	875.983	0.0890774	0.158943	0.560435	0.575183	0.758814
ENSMUSG00000002489	1587.61	-0.0269567	0.0671182	-0.40163	0.687956	0.83511
ENSMUSG00000002496	3380.91	-0.0631737	0.103871	-0.608194	0.543059	0.733526
ENSMUSG00000002500	2.7344	-0.795593	0.985937	-0.806941	0.419701	1
ENSMUSG00000002504	398.42	-0.441354	0.176677	-2.49808	0.0124869	0.0434477
ENSMUSG00000002524	3509.63	-0.0765759	0.16459	-0.465251	0.641752	0.804244
ENSMUSG00000002546	2394.76	-0.125608	0.10149	-1.23765	0.215847	0.404806
ENSMUSG00000002550	621.679	0.0397537	0.0961955	0.41326	0.679416	0.829567
ENSMUSG00000002565	0.307054	-1.78138	3.50325	-0.508492	0.611108	1
ENSMUSG00000002578	1291.77	-0.538321	0.13144	-4.09557	4.2113e-05	0.000281499
ENSMUSG00000002580	727.17	-0.0522028	0.200967	-0.259758	0.795051	0.897079
ENSMUSG00000002588	3.88651	0.292943	0.899937	0.325515	0.744791	0.867986
ENSMUSG00000002602	737.825	0.330216	0.146628	2.25206	0.0243183	0.0758117
ENSMUSG00000002603	114.031	0.234239	0.291092	0.804692	0.420998	0.629835
ENSMUSG00000002608	1435.9	0.282961	0.127828	2.21361	0.0268559	0.0819821
ENSMUSG00000002617	1065.07	0.0802817	0.178337	0.450169	0.652589	0.812324
ENSMUSG00000002625	3471.09	-0.272356	0.0762806	-3.57045	0.000356362	0.0019499
ENSMUSG00000002633	127.308	-0.796402	0.183671	-4.33603	1.45078e-05	0.000104938
ENSMUSG00000002635	310.014	0.032948	0.168633	0.195383	0.845093	0.925416
ENSMUSG00000002658	1743.72	0.194401	0.101739	1.91079	0.056032	0.148348
ENSMUSG00000002660	776.537	0.0706081	0.180929	0.390254	0.696349	0.840036
ENSMUSG00000002661	145.047	-0.297768	0.227724	-1.30758	0.191015	0.371686
ENSMUSG00000002664	11.6407	-0.0282877	0.545582	-0.0518486	0.958649	0.98188
ENSMUSG00000002668	244.702	0.129923	0.25999	0.499724	0.61727	0.787603
ENSMUSG00000002679	440.8	0.0365498	0.145732	0.250801	0.801968	0.901329
ENSMUSG00000002688	278.197	1.69615	0.168326	10.0766	7.01221e-24	2.56978e-22
ENSMUSG00000002699	75.2168	0.0675409	0.268057	0.251964	0.801069	0.900686
ENSMUSG00000002718	3067.78	0.239472	0.0938719	2.55105	0.0107398	0.0383005
ENSMUSG00000002728	634.455	-0.0325741	0.105669	-0.308264	0.757881	0.876238
ENSMUSG00000002731	1297.92	-0.281153	0.113085	-2.48622	0.0129106	0.04464
ENSMUSG00000002732	103.097	0.178427	0.189483	0.941652	0.346371	0.558438
ENSMUSG00000002733	578.512	0.526847	0.108724	4.84572	1.26154e-06	1.08514e-05
ENSMUSG00000002741	3329.45	-0.0785683	0.0830609	-0.945911	0.344194	0.556149
ENSMUSG00000002748	7517.52	0.458532	0.128989	3.55481	0.000378246	0.00205802
ENSMUSG00000002763	739.673	-0.0810585	0.206801	-0.391965	0.695084	0.839276
ENSMUSG00000002767	423.602	0.109848	0.187029	0.587332	0.556981	0.744537
ENSMUSG00000002768	1283.85	-0.274245	0.177092	-1.5486	0.121478	0.267448
ENSMUSG00000002769	30.3932	0.0680073	0.307103	0.221447	0.824744	0.91456
ENSMUSG00000002771	796.085	-1.33514	0.220474	-6.05576	1.39757e-09	1.73809e-08
ENSMUSG00000002778	1610.89	0.137329	0.106219	1.29288	0.196053	0.378845
ENSMUSG00000002781	221.849	0.0768022	0.164085	0.468064	0.639739	0.80268
ENSMUSG00000002791	3.23509	-0.637572	1.05006	-0.607178	0.543733	1
ENSMUSG00000002797	103.547	-0.0588092	0.197202	-0.298218	0.765537	0.881065
ENSMUSG00000002799	1221.12	-0.855813	0.119498	-7.16173	7.96676e-13	1.34458e-11
ENSMUSG00000002803	564.675	-0.207752	0.133871	-1.55189	0.120689	0.266243
ENSMUSG00000002804	178.713	0.0459507	0.17327	0.265197	0.790858	0.894828
ENSMUSG00000002808	312.452	0.493285	0.167115	2.95177	0.00315957	0.0134591
ENSMUSG00000002812	2483.04	0.148312	0.119885	1.23712	0.216044	0.405102
ENSMUSG00000002814	433.943	0.459927	0.10941	4.20369	2.62593e-05	0.000181602
ENSMUSG00000002820	650.962	0.192406	0.102625	1.87484	0.0608143	0.158532
ENSMUSG00000002825	493.086	-0.124303	0.124333	-0.99976	0.317427	0.527156
ENSMUSG00000002831	25.6291	-0.382803	0.332987	-1.14961	0.250306	0.448269
ENSMUSG00000002833	2958.52	-0.047966	0.107213	-0.44739	0.654594	0.813579
ENSMUSG00000002835	840.982	1.39145	0.0918432	15.1503	7.54028e-52	1.30768e-49
ENSMUSG00000002844	1572.21	-0.20147	0.151104	-1.33332	0.182426	0.359557
ENSMUSG00000002845	535.702	0.216856	0.108913	1.99109	0.0464705	0.128292
ENSMUSG00000002846	625.216	0.025951	0.176688	0.146875	0.883231	0.945281
ENSMUSG00000002847	7.01535	-0.502873	0.663478	-0.757935	0.44849	0.655039
ENSMUSG00000002870	1951.6	1.58535	0.10527	15.0598	2.97886e-51	5.04688e-49
ENSMUSG00000002871	487.89	-0.313805	0.136583	-2.29754	0.021588	0.0687998
ENSMUSG00000002881	554.636	0.681917	0.156606	4.35435	1.33463e-05	9.72384e-05
ENSMUSG00000002885	353.78	0.274219	0.176608	1.5527	0.120495	0.266028
ENSMUSG00000002897	249.789	0.338873	0.115835	2.92549	0.00343912	0.0144914
ENSMUSG00000002900	1781.95	0.39345	0.156799	2.50926	0.0120984	0.0423097
ENSMUSG00000002908	905.212	0.0974858	0.106989	0.911172	0.362205	0.574214
ENSMUSG00000002910	199.828	0.10697	0.168792	0.633741	0.52625	0.720633
ENSMUSG00000002930	96.5186	-1.61987	0.234194	-6.91678	4.62032e-12	7.28437e-11
ENSMUSG00000002944	73.9352	-1.47737	0.267421	-5.52452	3.30387e-08	3.54792e-07
ENSMUSG00000002948	1719.45	0.0314251	0.0889128	0.353437	0.723761	0.856159
ENSMUSG00000002949	1353.19	-0.015226	0.0737818	-0.206366	0.836505	0.920907
ENSMUSG00000002957	3335.29	-0.136639	0.0804426	-1.69859	0.0893965	0.212438
ENSMUSG00000002963	491.298	0.141659	0.136553	1.03739	0.299552	0.507237
ENSMUSG00000002968	2933.74	0.360387	0.143105	2.51833	0.0117913	0.0414331
ENSMUSG00000002980	161.977	-0.289547	0.184487	-1.56948	0.116537	0.259502
ENSMUSG00000002981	2292.19	-0.124068	0.104025	-1.19267	0.233	0.426338
ENSMUSG00000002983	58.3361	-0.496502	0.270085	-1.83832	0.0660152	0.168813
ENSMUSG00000002984	1057.9	0.181817	0.119453	1.52208	0.12799	0.277841
ENSMUSG00000002985	1625.81	-0.18621	0.180905	-1.02933	0.303325	0.511
ENSMUSG00000002992	0	NA	NA	NA	NA	1
ENSMUSG00000002996	1130.29	0.544277	0.113914	4.77796	1.77081e-06	1.49376e-05
ENSMUSG00000002997	3565.1	-0.534421	0.138362	-3.8625	0.000112233	0.000690829
ENSMUSG00000003031	3235.07	0.789803	0.0988734	7.98802	1.37126e-15	2.88187e-14
ENSMUSG00000003032	99.3636	0.350313	0.263552	1.3292	0.183783	0.361058
ENSMUSG00000003033	3340.4	0.063727	0.0985433	0.64669	0.517833	0.71359
ENSMUSG00000003037	1961.45	0.371319	0.108645	3.41774	0.000631429	0.00322599
ENSMUSG00000003038	417.239	0.783347	0.117172	6.68545	2.30216e-11	3.41679e-10
ENSMUSG00000003039	3143.74	0.1264	0.0796961	1.58603	0.112733	0.253283
ENSMUSG00000003051	6.0736	0.16974	0.700876	0.242182	0.808639	0.905223
ENSMUSG00000003053	0	NA	NA	NA	NA	1
ENSMUSG00000003062	916.369	-0.339727	0.136288	-2.49271	0.0126772	0.0439916
ENSMUSG00000003068	1884.45	0.406198	0.0897576	4.5255	6.0254e-06	4.68607e-05
ENSMUSG00000003070	938.153	-0.024752	0.193482	-0.12793	0.898205	0.953906
ENSMUSG00000003072	1964.79	0.240948	0.198874	1.21156	0.225681	0.416926
ENSMUSG00000003099	1777.77	0.129489	0.0758166	1.70792	0.0876511	0.209497
ENSMUSG00000003119	1845.36	0.469042	0.12959	3.61942	0.000295264	0.00164638
ENSMUSG00000003123	324.36	0.742168	0.164465	4.51262	6.40313e-06	4.95012e-05
ENSMUSG00000003131	6827.18	-0.137061	0.0827451	-1.65642	0.097636	0.227222
ENSMUSG00000003134	446.203	-0.00658366	0.103375	-0.0636869	0.94922	0.977422
ENSMUSG00000003135	971.55	0.580202	0.131753	4.40372	1.0641e-05	7.89387e-05
ENSMUSG00000003153	701.255	-0.489153	0.109071	-4.48474	7.30035e-06	5.57718e-05
ENSMUSG00000003154	853.196	0.106753	0.174992	0.610044	0.541833	0.732228
ENSMUSG00000003161	1053.17	-0.0965305	0.128704	-0.750018	0.453244	0.658663
ENSMUSG00000003166	2028.23	-0.164984	0.108958	-1.5142	0.129975	0.280795
ENSMUSG00000003184	963.082	0.263927	0.0946635	2.78806	0.00530246	0.0210502
ENSMUSG00000003190	223.958	1.24816	0.207467	6.01619	1.7857e-09	2.19721e-08
ENSMUSG00000003198	225.72	-0.240171	0.164867	-1.45675	0.145185	0.304921
ENSMUSG00000003199	2059.67	-0.00660331	0.161098	-0.0409893	0.967304	0.985397
ENSMUSG00000003200	1117.99	0.104046	0.142363	0.730847	0.464873	0.668825
ENSMUSG00000003206	29.8811	-0.866616	0.34531	-2.50967	0.0120844	0.0422809
ENSMUSG00000003208	366.256	0.0903827	0.140166	0.644825	0.51904	0.714424
ENSMUSG00000003226	3854.62	0.133019	0.132603	1.00313	0.315797	0.525672
ENSMUSG00000003227	31.6032	1.46605	0.341435	4.29379	1.75647e-05	0.000125482
ENSMUSG00000003228	642.956	-0.243205	0.135938	-1.78909	0.0736011	0.183836
ENSMUSG00000003233	4222.29	0.0153334	0.130789	0.117238	0.906671	0.957996
ENSMUSG00000003234	1266.42	-0.128566	0.131584	-0.977068	0.328536	0.539195
ENSMUSG00000003235	1605.59	-0.0967367	0.152787	-0.633147	0.526638	0.720894
ENSMUSG00000003269	3632.71	0.111108	0.0845533	1.31406	0.188827	0.368404
ENSMUSG00000003271	175.055	-0.536864	0.259063	-2.07233	0.0382345	0.109465
ENSMUSG00000003273	920.012	-0.64146	0.132145	-4.8542	1.20875e-06	1.04504e-05
ENSMUSG00000003279	885.295	0.0709983	0.130994	0.541997	0.587821	0.767045
ENSMUSG00000003282	273.821	0.442048	0.139499	3.16882	0.00153059	0.00711209
ENSMUSG00000003283	22.2907	-0.415035	0.360024	-1.1528	0.248993	0.446582
ENSMUSG00000003299	716.618	0.408533	0.175931	2.32212	0.0202265	0.0651586
ENSMUSG00000003308	858.533	0.155096	0.102276	1.51644	0.129409	0.279983
ENSMUSG00000003309	11.503	-0.598041	0.563312	-1.06165	0.288394	0.494348
ENSMUSG00000003316	5124.79	-0.0143253	0.0795298	-0.180125	0.857055	0.931811
ENSMUSG00000003341	49.009	-1.64452	0.267337	-6.15149	7.67575e-10	9.82326e-09
ENSMUSG00000003344	1420.51	0.169865	0.131727	1.28953	0.197214	0.380453
ENSMUSG00000003345	2576.24	0.182502	0.114272	1.59708	0.110248	0.24898
ENSMUSG00000003346	783.751	0.259915	0.208398	1.24721	0.212322	0.400651
ENSMUSG00000003348	970.353	0.0549209	0.104841	0.523849	0.600383	0.775114
ENSMUSG00000003352	4906.44	-0.330939	0.131996	-2.5072	0.0121692	0.0425441
ENSMUSG00000003354	69.402	-1.13423	0.237298	-4.77978	1.75487e-06	1.48088e-05
ENSMUSG00000003355	26.2848	-0.281983	0.36476	-0.773064	0.439484	0.646512
ENSMUSG00000003360	2265.43	0.113451	0.0881312	1.2873	0.197989	0.381748
ENSMUSG00000003363	1582.97	-0.253185	0.0949161	-2.66746	0.00764271	0.0288238
ENSMUSG00000003378	4300.8	0.0360385	0.133512	0.269926	0.787217	0.893472
ENSMUSG00000003379	5.79491	0.270499	0.740571	0.365258	0.714919	0.851693
ENSMUSG00000003380	505.867	-0.224508	0.221761	-1.01239	0.311353	0.520587
ENSMUSG00000003382	701.188	0.045449	0.0850305	0.534502	0.592994	0.770588
ENSMUSG00000003402	2270.1	-0.00180587	0.0754653	-0.0239298	0.980909	0.991382
ENSMUSG00000003410	15728.2	0.0775846	0.103099	0.752524	0.451736	0.657214
ENSMUSG00000003411	355.828	-0.777671	0.147924	-5.25725	1.46229e-07	1.44361e-06
ENSMUSG00000003418	33.0598	-1.42756	0.306334	-4.66016	3.15967e-06	2.57461e-05
ENSMUSG00000003420	165.352	-0.170006	0.292018	-0.582176	0.560448	0.747524
ENSMUSG00000003421	860.155	0.233144	0.0988258	2.35914	0.0183173	0.0598751
ENSMUSG00000003423	859.888	0.0120219	0.106738	0.112631	0.910323	0.959921
ENSMUSG00000003429	4609.29	0.327502	0.121858	2.68756	0.00719752	0.0273744
ENSMUSG00000003435	4548.54	0.242761	0.108816	2.23094	0.0256853	0.0791658
ENSMUSG00000003436	435.595	0.20831	0.190278	1.09477	0.273618	0.476586
ENSMUSG00000003437	2177.91	0.0513343	0.127574	0.40239	0.687397	0.834756
ENSMUSG00000003438	968.15	0.469726	0.134304	3.49748	0.000469674	0.00248548
ENSMUSG00000003444	213.922	0.396285	0.194837	2.03393	0.0419589	0.118117
ENSMUSG00000003452	1358.2	-0.36674	0.123514	-2.96922	0.00298555	0.0128081
ENSMUSG00000003458	2213.48	0.0522194	0.0843426	0.619134	0.535828	0.727283
ENSMUSG00000003464	2044.35	0.0516589	0.0953881	0.541566	0.588118	0.767284
ENSMUSG00000003469	73.3006	0.906515	0.264586	3.42617	0.000612166	0.00313922
ENSMUSG00000003476	18.7038	-0.756283	0.440345	-1.71748	0.0858917	0.206389
ENSMUSG00000003477	0.724327	0.292733	2.43744	0.120099	0.904405	1
ENSMUSG00000003484	8.27153	6.51331	3.06303	2.12643	NA	1
ENSMUSG00000003500	990.936	-0.310817	0.0983989	-3.15875	0.00158449	0.00733312
ENSMUSG00000003505	14.9092	-0.616823	0.812722	-0.75896	0.447877	0.654566
ENSMUSG00000003518	326.696	-0.317184	0.119665	-2.65059	0.00803516	0.0300109
ENSMUSG00000003526	211.836	-0.0972748	0.134298	-0.724321	0.468869	0.672276
ENSMUSG00000003527	1042.2	0.119851	0.0992821	1.20718	0.227364	0.419195
ENSMUSG00000003528	1416.97	-0.312832	0.13769	-2.272	0.0230864	0.0726501
ENSMUSG00000003531	821.538	-0.0909598	0.201074	-0.45237	0.651002	0.811312
ENSMUSG00000003534	4348.84	0.304238	0.15599	1.95037	0.0511317	0.138436
ENSMUSG00000003541	60.5313	-0.0199091	0.295456	-0.0673846	0.946276	0.975873
ENSMUSG00000003545	4.69707	1.04	0.858248	1.21177	0.225599	0.416926
ENSMUSG00000003546	851.833	-0.183011	0.153758	-1.19025	0.233947	0.427466
ENSMUSG00000003549	533.226	0.345477	0.1406	2.45717	0.0140037	0.0478411
ENSMUSG00000003555	5.34843	-0.0364131	0.78658	-0.046293	0.963077	0.98309
ENSMUSG00000003559	357.808	-1.03415	0.176365	-5.8637	4.5266e-09	5.34289e-08
ENSMUSG00000003573	1018.9	0.522937	0.122289	4.27624	1.90076e-05	0.000134829
ENSMUSG00000003575	2729.12	-0.0609884	0.147395	-0.413775	0.679039	0.829362
ENSMUSG00000003581	948.495	-0.0735577	0.108037	-0.680855	0.495963	0.695856
ENSMUSG00000003585	138.549	-0.957957	0.162552	-5.89324	3.78702e-09	4.5086e-08
ENSMUSG00000003604	142.793	-0.13446	0.148117	-0.907796	0.363986	0.576027
ENSMUSG00000003617	260.93	-1.25116	0.240963	-5.19233	2.07682e-07	2.00886e-06
ENSMUSG00000003623	438.505	-0.108664	0.130867	-0.830342	0.406345	0.616247
ENSMUSG00000003644	344.085	-0.268993	0.149948	-1.79391	0.0728276	0.182428
ENSMUSG00000003657	503.962	-0.704593	0.142987	-4.92766	8.32193e-07	7.34631e-06
ENSMUSG00000003660	6358.7	0.234314	0.0873973	2.68103	0.00733967	0.0278238
ENSMUSG00000003662	877.136	-0.014449	0.0925089	-0.156191	0.875883	0.94132
ENSMUSG00000003665	28.8	-0.00437671	0.426142	-0.0102705	0.991805	0.996738
ENSMUSG00000003680	387.795	0.058895	0.144841	0.406618	0.684289	0.832448
ENSMUSG00000003721	594.404	-0.351313	0.134323	-2.61543	0.00891155	0.0327237
ENSMUSG00000003731	2119.02	0.0392302	0.0944848	0.415202	0.677994	0.828505
ENSMUSG00000003746	299.314	-0.870189	0.127524	-6.82372	8.87115e-12	1.36443e-10
ENSMUSG00000003752	256.669	-0.232466	0.116828	-1.98982	0.0466111	0.128632
ENSMUSG00000003762	544.347	0.0541355	0.114834	0.471426	0.637337	0.800866
ENSMUSG00000003778	4229.06	-0.0916662	0.0868072	-1.05597	0.29098	0.49713
ENSMUSG00000003779	868.675	1.58588	0.118044	13.4347	3.78527e-41	3.7219e-39
ENSMUSG00000003808	1574.77	0.205885	0.0774393	2.65866	0.00784518	0.0294361
ENSMUSG00000003809	639.645	0.0395255	0.106966	0.369515	0.711744	0.85008
ENSMUSG00000003810	5965.67	0.0355326	0.080458	0.441629	0.658758	0.816041
ENSMUSG00000003812	174.952	0.190788	0.153379	1.2439	0.213535	0.402146
ENSMUSG00000003813	581.184	0.271547	0.124354	2.18366	0.028987	0.087314
ENSMUSG00000003814	12638	-0.00333227	0.0904613	-0.0368364	0.970615	0.986837
ENSMUSG00000003824	237.474	1.52825	0.161722	9.44986	3.39298e-21	1.06302e-19
ENSMUSG00000003847	4414.13	-0.0630279	0.1039	-0.606618	0.544104	0.734196
ENSMUSG00000003848	899.82	0.220669	0.0985138	2.23998	0.0250921	0.0777837
ENSMUSG00000003849	39.2785	-0.32015	0.311647	-1.02728	0.304287	0.512032
ENSMUSG00000003863	1704.96	-0.628199	0.106736	-5.88552	3.96816e-09	4.71406e-08
ENSMUSG00000003865	840.831	0.212869	0.134211	1.58607	0.112722	0.253283
ENSMUSG00000003868	1732.96	0.447104	0.100799	4.43559	9.1821e-06	6.89283e-05
ENSMUSG00000003872	66.9374	-0.62892	0.217784	-2.88782	0.00387925	0.0160663
ENSMUSG00000003873	1161.91	0.196852	0.145863	1.34957	0.177155	0.352751
ENSMUSG00000003882	3.20764	0.3489	0.858893	0.40622	0.684581	1
ENSMUSG00000003923	995.351	0.0519059	0.124551	0.416744	0.676866	0.827853
ENSMUSG00000003929	2068.3	-0.0182586	0.145477	-0.125509	0.900121	0.9547
ENSMUSG00000003934	4493.54	-0.286147	0.134311	-2.13048	0.0331319	0.0977141
ENSMUSG00000003948	2005.16	-0.526276	0.0813076	-6.47265	9.6297e-11	1.35264e-09
ENSMUSG00000003949	282.613	0.068897	0.190996	0.360725	0.718305	0.853234
ENSMUSG00000003955	514.14	0.362671	0.197261	1.83853	0.0659842	0.168753
ENSMUSG00000003970	9354.55	0.300871	0.145451	2.06854	0.038589	0.110265
ENSMUSG00000003974	285.645	-2.00383	0.184203	-10.8784	1.4614e-27	6.92202e-26
ENSMUSG00000003992	2419.66	0.0319933	0.142808	0.22403	0.822734	0.913296
ENSMUSG00000004018	288.74	0.242378	0.17344	1.39747	0.162272	0.330448
ENSMUSG00000004031	1243.52	0.583126	0.0941973	6.19047	5.99832e-10	7.77593e-09
ENSMUSG00000004032	1140.87	-0.0543745	0.0973558	-0.558513	0.576494	0.759544
ENSMUSG00000004035	813.251	0.0623658	0.0951739	0.655283	0.512286	0.70896
ENSMUSG00000004038	0.280539	1.55477	3.51463	0.442371	0.658221	1
ENSMUSG00000004040	960.781	-0.0413805	0.0961773	-0.430252	0.667012	0.821362
ENSMUSG00000004043	42.5225	-0.975026	0.311586	-3.12923	0.00175263	0.00801199
ENSMUSG00000004044	604.642	-0.060186	0.203727	-0.295425	0.767669	0.882137
ENSMUSG00000004054	539.485	0.402769	0.180954	2.2258	0.0260275	0.079952
ENSMUSG00000004056	1682.06	0.582301	0.0980161	5.94087	2.83509e-09	3.41966e-08
ENSMUSG00000004069	819.421	-0.0902511	0.109377	-0.825137	0.409294	0.619014
ENSMUSG00000004070	710.52	-0.0768939	0.121157	-0.634665	0.525647	0.720076
ENSMUSG00000004071	1905.51	0.0278713	0.0888418	0.313718	0.753735	0.873581
ENSMUSG00000004085	397.841	0.223465	0.134041	1.66714	0.0954871	0.223425
ENSMUSG00000004096	2108.83	0.291393	0.115589	2.52095	0.011704	0.0411723
ENSMUSG00000004098	48.9962	-1.43765	0.264697	-5.43128	5.59517e-08	5.8294e-07
ENSMUSG00000004099	7017.54	0.423857	0.125202	3.38538	0.000710791	0.00358406
ENSMUSG00000004100	780.708	0.420601	0.0988151	4.25645	2.07697e-05	0.000146198
ENSMUSG00000004105	448.584	0.258103	0.225845	1.14283	0.253109	0.451516
ENSMUSG00000004110	4335.6	-0.464131	0.116016	-4.00057	6.31906e-05	0.000409466
ENSMUSG00000004113	5111.53	-0.812581	0.0887383	-9.15705	5.33338e-20	1.52358e-18
ENSMUSG00000004127	287.875	0.297548	0.182943	1.62646	0.103853	0.237623
ENSMUSG00000004151	606.865	0.543656	0.14697	3.69908	0.000216378	0.00124988
ENSMUSG00000004187	1318.32	-1.01025	0.129972	-7.77279	7.67766e-15	1.5331e-13
ENSMUSG00000004207	8730.28	-0.188558	0.0972684	-1.93854	0.0525577	0.141341
ENSMUSG00000004221	747.62	-0.078218	0.125389	-0.623802	0.532758	0.725012
ENSMUSG00000004231	73.4653	-5.0713	0.445277	-11.3891	4.73822e-30	2.57043e-28
ENSMUSG00000004233	304.814	0.393375	0.158249	2.4858	0.0129259	0.0446577
ENSMUSG00000004263	404.588	0.252335	0.223802	1.12749	0.259535	0.459473
ENSMUSG00000004264	2253.82	0.224125	0.110481	2.02863	0.0424958	0.119384
ENSMUSG00000004266	71.1356	0.31213	0.246436	1.26657	0.205308	0.391436
ENSMUSG00000004267	1236.89	-0.849874	0.12654	-6.71626	1.86445e-11	2.79161e-10
ENSMUSG00000004268	1175.24	0.476029	0.0920508	5.17137	2.32388e-07	2.23216e-06
ENSMUSG00000004270	551.709	0.0419998	0.124261	0.337996	0.735366	0.862293
ENSMUSG00000004285	960.845	0.0361435	0.140181	0.257835	0.796534	0.897787
ENSMUSG00000004296	0.442623	-2.23161	3.25839	-0.684882	0.493418	1
ENSMUSG00000004317	1127.7	-0.365716	0.0830416	-4.40401	1.06268e-05	7.88597e-05
ENSMUSG00000004319	2865.76	-0.138818	0.0882911	-1.57228	0.115886	0.258366
ENSMUSG00000004328	529.961	0.707715	0.211659	3.34365	0.000826827	0.00411514
ENSMUSG00000004341	0.357421	-0.811546	2.96954	-0.27329	0.78463	1
ENSMUSG00000004344	0.246692	0.0244222	3.53381	0.00691102	0.994486	1
ENSMUSG00000004347	754.059	-0.225856	0.136947	-1.64922	0.0991022	0.229906
ENSMUSG00000004356	1073.95	0.552563	0.100233	5.51281	3.53158e-08	3.77771e-07
ENSMUSG00000004359	1.2786	-0.27916	1.46711	-0.19028	0.84909	1
ENSMUSG00000004360	3905.03	-0.1562	0.148313	-1.05318	0.292258	0.49845
ENSMUSG00000004364	4252.62	-0.104185	0.123453	-0.843926	0.398711	0.609791
ENSMUSG00000004366	791.678	0.448715	0.257208	1.74456	0.0810617	0.19787
ENSMUSG00000004371	10.4537	-0.397399	0.532354	-0.746494	0.455369	0.660661
ENSMUSG00000004383	1433.5	0.17382	0.0737224	2.35776	0.0183855	0.0600178
ENSMUSG00000004393	752.032	0.265985	0.0915867	2.90419	0.003682	0.0153533
ENSMUSG00000004394	1302.51	0.161064	0.09817	1.64066	0.100868	0.232806
ENSMUSG00000004415	697.19	0.0782096	0.205734	0.380149	0.703835	0.844978
ENSMUSG00000004446	403.049	-0.517069	0.118346	-4.36915	1.24733e-05	9.13616e-05
ENSMUSG00000004451	691.429	-0.139855	0.101964	-1.37162	0.170182	0.34212
ENSMUSG00000004455	438.782	0.375408	0.143457	2.61687	0.00887406	0.0326023
ENSMUSG00000004460	1341.07	-0.386747	0.129183	-2.99379	0.0027554	0.0119464
ENSMUSG00000004462	416.407	0.278408	0.10467	2.65987	0.00781712	0.0293509
ENSMUSG00000004473	48.1116	-0.494819	0.248564	-1.99071	0.0465124	0.128378
ENSMUSG00000004500	576.121	0.058935	0.10594	0.556304	0.578003	0.761122
ENSMUSG00000004508	1713.58	-0.213375	0.105801	-2.01675	0.0437213	0.122203
ENSMUSG00000004530	5516.36	0.483183	0.133081	3.63074	0.000282606	0.00158341
ENSMUSG00000004535	3381.02	0.0384588	0.119171	0.322718	0.746909	0.869623
ENSMUSG00000004540	11.3459	0.106928	0.568574	0.188063	0.850828	0.928479
ENSMUSG00000004542	9.92507	0.107027	0.73169	0.146274	0.883705	0.945386
ENSMUSG00000004552	18.8094	0.2035	0.407037	0.499954	0.617107	0.787584
ENSMUSG00000004558	2150.52	0.517063	0.0771059	6.70588	2.00198e-11	2.9894e-10
ENSMUSG00000004561	1256.29	-0.302769	0.084257	-3.5934	0.000326392	0.00180215
ENSMUSG00000004562	2491.97	-0.0220126	0.0995976	-0.221016	0.82508	0.914592
ENSMUSG00000004565	1360.8	-0.445842	0.0935177	-4.76746	1.86559e-06	1.5689e-05
ENSMUSG00000004567	1931.45	-0.0773042	0.104914	-0.736834	0.461224	0.665517
ENSMUSG00000004568	1353.11	0.0774542	0.0971107	0.797587	0.42511	0.63372
ENSMUSG00000004591	1771.88	0.524528	0.109807	4.77682	1.78089e-06	1.50111e-05
ENSMUSG00000004609	66.6362	0.0595969	0.269742	0.22094	0.825139	0.914592
ENSMUSG00000004610	177.882	0.130288	0.195957	0.664882	0.506126	0.704492
ENSMUSG00000004612	0.580421	0.711346	2.29446	0.310028	0.75654	1
ENSMUSG00000004626	791.922	0.683857	0.0944186	7.24282	4.39444e-13	7.5321e-12
ENSMUSG00000004630	6.85758	0.0386903	0.663385	0.0583225	0.953492	0.979928
ENSMUSG00000004631	733.463	-0.187904	0.102017	-1.84189	0.0654906	0.167881
ENSMUSG00000004633	922.973	0.141575	0.105022	1.34805	0.177643	0.353244
ENSMUSG00000004637	261.296	-0.0421436	0.137036	-0.307538	0.758434	0.876785
ENSMUSG00000004642	948.38	0.562344	0.130283	4.31633	1.58643e-05	0.000113889
ENSMUSG00000004651	0.156448	-0.696916	3.53381	-0.197214	0.84366	1
ENSMUSG00000004654	0	NA	NA	NA	NA	1
ENSMUSG00000004655	197.631	-0.675068	0.627478	-1.07584	0.281997	0.487174
ENSMUSG00000004661	440.135	0.132194	0.136762	0.966604	0.333742	0.544818
ENSMUSG00000004665	477.535	0.326225	0.212937	1.53203	0.125516	0.273948
ENSMUSG00000004667	1048.12	0.336677	0.0887403	3.79396	0.000148266	0.000887381
ENSMUSG00000004668	5.16384	0.456251	0.78668	0.57997	0.561935	0.748646
ENSMUSG00000004677	3609.88	0.286494	0.10901	2.62813	0.00858547	0.0317167
ENSMUSG00000004698	505.613	0.148288	0.126316	1.17394	0.240418	0.435839
ENSMUSG00000004707	5.74884	-0.240461	0.788363	-0.305013	0.760357	0.877948
ENSMUSG00000004709	1.75227	-0.273229	1.39335	-0.196094	0.844536	1
ENSMUSG00000004730	80.5861	-0.328558	0.269824	-1.21768	0.223346	0.414179
ENSMUSG00000004748	59.8852	0.117548	0.224012	0.52474	0.599764	0.774632
ENSMUSG00000004768	986.702	0.19179	0.114549	1.67431	0.0940702	0.22088
ENSMUSG00000004771	2655.28	-0.615511	0.141713	-4.34337	1.40315e-05	0.000101793
ENSMUSG00000004788	903.741	0.241651	0.0876503	2.75699	0.00583361	0.0229111
ENSMUSG00000004789	3295.11	0.0867526	0.0738995	1.17393	0.240424	0.435839
ENSMUSG00000004791	90.6509	0.153536	0.200033	0.767553	0.442753	0.649372
ENSMUSG00000004798	3686.16	-0.130351	0.0975251	-1.33659	0.181357	0.358081
ENSMUSG00000004814	19.7468	-0.356209	0.561487	-0.634404	0.525817	0.720264
ENSMUSG00000004815	729.864	-0.573609	0.131705	-4.35524	1.3292e-05	9.69074e-05
ENSMUSG00000004821	0	NA	NA	NA	NA	1
ENSMUSG00000004837	103.132	0.133536	0.241093	0.553878	0.579662	0.762031
ENSMUSG00000004842	0.190753	0.0244222	3.53381	0.00691102	0.994486	1
ENSMUSG00000004843	689.276	-1.09716	0.142986	-7.6732	1.67758e-14	3.2554e-13
ENSMUSG00000004846	1709.66	-0.00783688	0.113657	-0.0689518	0.945028	0.975271
ENSMUSG00000004849	1740.96	0.0110318	0.115301	0.0956776	0.923777	0.966169
ENSMUSG00000004864	7.68477	0.19588	0.783425	0.25003	0.802564	0.901447
ENSMUSG00000004865	3485.63	0.192267	0.0806653	2.38352	0.017148	0.0567008
ENSMUSG00000004872	400.859	-5.61	0.507088	-11.0632	1.893e-28	9.34827e-27
ENSMUSG00000004880	742.516	0.894494	0.0894863	9.99589	1.5886e-23	5.71715e-22
ENSMUSG00000004885	479.857	-0.821912	0.169947	-4.8363	1.3228e-06	1.13365e-05
ENSMUSG00000004891	8977.78	0.629465	0.12542	5.01884	5.19848e-07	4.7293e-06
ENSMUSG00000004892	1065.72	0.491132	0.124258	3.95253	7.733e-05	0.000492394
ENSMUSG00000004894	5.88066	-0.759986	0.735123	-1.03382	0.30122	0.508731
ENSMUSG00000004895	1500.1	0.255771	0.0836476	3.05772	0.00223028	0.00992163
ENSMUSG00000004896	1162.78	0.081869	0.0853096	0.959669	0.337222	0.548992
ENSMUSG00000004897	5448.09	0.51533	0.0672405	7.66399	1.8025e-14	3.48859e-13
ENSMUSG00000004902	78.2826	-1.22514	0.200882	-6.09883	1.06846e-09	1.35091e-08
ENSMUSG00000004929	1034.26	0.67881	0.100194	6.77497	1.24431e-11	1.89007e-10
ENSMUSG00000004931	310.034	0.50115	0.186424	2.68823	0.00718322	0.0273342
ENSMUSG00000004933	258.864	-0.59578	0.163379	-3.64661	0.000265722	0.00149758
ENSMUSG00000004934	797.359	0.309083	0.14024	2.20397	0.0275267	0.0837049
ENSMUSG00000004936	637.592	-0.0919076	0.102425	-0.897319	0.369549	0.581795
ENSMUSG00000004937	3546.59	0.214782	0.127366	1.68634	0.091731	0.216546
ENSMUSG00000004939	2.87712	-0.765146	1.057	-0.723886	0.469136	1
ENSMUSG00000004945	721.484	-0.162011	0.195507	-0.82867	0.407291	0.617171
ENSMUSG00000004947	462.647	0.211238	0.138578	1.52432	0.127428	0.277059
ENSMUSG00000004948	0.408246	-0.0795581	2.87195	-0.0277018	0.9779	1
ENSMUSG00000004951	13.6843	-0.288086	0.420276	-0.685469	0.493048	0.693625
ENSMUSG00000004952	319.838	-1.33478	0.126934	-10.5156	7.3233e-26	3.06064e-24
ENSMUSG00000004961	1539.16	-0.37364	0.11078	-3.37283	0.000744012	0.00373788
ENSMUSG00000004980	41567.1	0.0930892	0.172971	0.538178	0.590454	0.768605
ENSMUSG00000004988	7.23276	0.0798792	0.592466	0.134825	0.89275	0.951031
ENSMUSG00000004994	357.447	0.155901	0.116902	1.3336	0.182335	0.359496
ENSMUSG00000004996	219.243	0.0839387	0.147424	0.56937	0.569105	0.754048
ENSMUSG00000005034	4944.07	-0.349421	0.0860632	-4.06005	4.90613e-05	0.000323816
ENSMUSG00000005043	126.669	-0.170287	0.235834	-0.722062	0.470256	0.673261
ENSMUSG00000005045	5005.27	-0.834491	0.0991018	-8.42054	3.74746e-17	8.73416e-16
ENSMUSG00000005054	335.409	0.282828	0.122379	2.31109	0.0208279	0.0667737
ENSMUSG00000005057	920.962	0.11366	0.152165	0.746954	0.455091	0.660302
ENSMUSG00000005069	1600.92	-0.124793	0.107156	-1.16459	0.244185	0.440264
ENSMUSG00000005078	921.002	0.103529	0.0883737	1.17149	0.241402	0.436957
ENSMUSG00000005087	101.298	-0.816903	0.181842	-4.49237	7.04352e-06	5.39595e-05
ENSMUSG00000005089	4553.65	-0.779653	0.080417	-9.69513	3.16235e-22	1.05852e-20
ENSMUSG00000005102	1143.12	0.344433	0.0936472	3.67798	0.000235086	0.00134523
ENSMUSG00000005103	3261.71	-0.103779	0.0668539	-1.55232	0.120585	0.266142
ENSMUSG00000005107	17.5984	-0.638586	0.386018	-1.65429	0.0980685	0.228096
ENSMUSG00000005124	78.6452	-0.0933006	0.249759	-0.373563	0.708729	0.847942
ENSMUSG00000005125	543.793	1.74515	0.127335	13.7052	9.45262e-43	1.00093e-40
ENSMUSG00000005131	4.2453	-0.0432988	0.781895	-0.0553768	0.955838	0.980884
ENSMUSG00000005142	648.453	0.111906	0.121084	0.924197	0.355384	0.567074
ENSMUSG00000005148	116.686	0.329816	0.201158	1.63959	0.101091	0.233095
ENSMUSG00000005150	661.158	-0.079564	0.105737	-0.752469	0.451769	0.657214
ENSMUSG00000005161	10623.3	0.18857	0.164379	1.14716	0.251314	0.449358
ENSMUSG00000005198	7700.6	0.461712	0.180773	2.5541	0.0106463	0.0380347
ENSMUSG00000005202	0.383507	-0.962665	2.86613	-0.335876	0.736964	1
ENSMUSG00000005204	2312.42	0.0666664	0.0766388	0.869879	0.384367	0.595436
ENSMUSG00000005220	73.243	-4.23894	0.362922	-11.68	1.61272e-31	9.49736e-30
ENSMUSG00000005225	1160.34	0.0801807	0.10442	0.767867	0.442566	0.64921
ENSMUSG00000005232	1.68241	-3.29314	1.60629	-2.05015	0.0403497	1
ENSMUSG00000005233	589.329	1.61982	0.157961	10.2545	1.12906e-24	4.37808e-23
ENSMUSG00000005237	382.641	-0.553244	0.148664	-3.72143	0.000198095	0.00115577
ENSMUSG00000005251	15.1055	0.126181	0.628137	0.200881	0.840792	0.923152
ENSMUSG00000005262	1462.03	0.0168743	0.144906	0.11645	0.907296	0.958335
ENSMUSG00000005267	814.93	0.0460091	0.144379	0.318669	0.749978	0.871492
ENSMUSG00000005268	44.2388	-1.53265	0.290767	-5.27106	1.3564e-07	1.34571e-06
ENSMUSG00000005299	1547.21	-0.0242258	0.0725747	-0.333806	0.738526	0.864479
ENSMUSG00000005312	4153.34	0.283074	0.0981926	2.88284	0.00394106	0.0162916
ENSMUSG00000005320	51.7708	-0.228892	0.242787	-0.942769	0.345799	0.557884
ENSMUSG00000005338	7029.96	-0.792211	0.0921322	-8.59863	8.06745e-18	1.98754e-16
ENSMUSG00000005339	0.168239	0.745756	3.53381	0.211035	0.83286	1
ENSMUSG00000005354	1710.5	0.262256	0.145831	1.79835	0.0721218	0.180879
ENSMUSG00000005355	0.190753	0.0244222	3.53381	0.00691102	0.994486	1
ENSMUSG00000005357	118.108	-1.6362	0.201378	-8.12499	4.47393e-16	9.67009e-15
ENSMUSG00000005360	3829.43	-0.210408	0.0889158	-2.36637	0.0179633	0.0589365
ENSMUSG00000005362	834.359	-0.223386	0.121038	-1.84558	0.0649535	0.166912
ENSMUSG00000005364	2.20952	-3.06491	1.46801	-2.0878	0.0368163	1
ENSMUSG00000005370	1699.79	0.457607	0.0803516	5.69506	1.23326e-08	1.39582e-07
ENSMUSG00000005371	4894.77	-0.252276	0.112197	-2.24851	0.0245435	0.0763951
ENSMUSG00000005373	58.0283	0.754915	0.303996	2.48331	0.0130169	0.0449299
ENSMUSG00000005374	767.402	0.508859	0.101188	5.02887	4.93376e-07	4.49777e-06
ENSMUSG00000005378	783.128	0.425743	0.0992774	4.28842	1.79949e-05	0.000128241
ENSMUSG00000005397	2583.44	-0.528495	0.127967	-4.12994	3.6285e-05	0.000245523
ENSMUSG00000005410	1576.49	1.56178	0.113964	13.7041	9.59795e-43	1.01146e-40
ENSMUSG00000005413	215.559	0.109905	0.168205	0.653396	0.513501	0.709883
ENSMUSG00000005417	7234.06	0.145578	0.0637914	2.28209	0.0224841	0.0711002
ENSMUSG00000005442	7383.04	0.48839	0.172572	2.83007	0.00465385	0.0187885
ENSMUSG00000005447	2870.91	-0.202165	0.160154	-1.26232	0.206835	0.393669
ENSMUSG00000005465	18.7057	0.0371932	0.376391	0.0988154	0.921285	0.964913
ENSMUSG00000005469	2999.64	-0.224885	0.0983543	-2.28648	0.0222261	0.0703753
ENSMUSG00000005470	236.495	1.61153	0.180507	8.92782	4.34475e-19	1.16984e-17
ENSMUSG00000005474	0	NA	NA	NA	NA	1
ENSMUSG00000005481	1224.26	0.498526	0.149316	3.33874	0.000841592	0.00417761
ENSMUSG00000005483	954.389	0.180647	0.103924	1.73826	0.0821654	0.199932
ENSMUSG00000005493	5.79392	0.119602	0.739126	0.161815	0.871452	0.93957
ENSMUSG00000005501	1275.43	0.295606	0.0897254	3.29456	0.00098576	0.00481791
ENSMUSG00000005503	31.7894	-7.69924	1.06808	-7.20848	5.65811e-13	9.63059e-12
ENSMUSG00000005505	384.248	0.103253	0.136699	0.755333	0.450049	0.65613
ENSMUSG00000005506	7352.1	0.325718	0.0961211	3.38862	0.000702456	0.00354853
ENSMUSG00000005510	918.26	-0.0112959	0.094206	-0.119906	0.904558	0.956754
ENSMUSG00000005514	1935.47	0.0193426	0.0989265	0.195525	0.844982	0.925401
ENSMUSG00000005533	4650.9	-0.00954919	0.0917902	-0.104033	0.917143	0.962923
ENSMUSG00000005534	3212.35	0.0132518	0.0741674	0.178674	0.858194	0.932288
ENSMUSG00000005540	19.8482	-0.34288	0.448955	-0.76373	0.445028	0.651712
ENSMUSG00000005547	16.9816	-2.72283	0.490877	-5.54686	2.90846e-08	3.14786e-07
ENSMUSG00000005553	28.2903	0.101222	0.305554	0.331275	0.740437	0.865673
ENSMUSG00000005566	8195.35	0.345616	0.0990579	3.48903	0.000484774	0.00255572
ENSMUSG00000005575	2844.14	0.069162	0.0940184	0.735622	0.461961	0.666275
ENSMUSG00000005580	248.096	-0.757873	0.128705	-5.88843	3.89871e-09	4.63656e-08
ENSMUSG00000005583	1320.79	2.26808	0.153781	14.7488	3.13283e-49	4.66221e-47
ENSMUSG00000005609	3468.79	-0.00328092	0.113042	-0.0290238	0.976846	0.989788
ENSMUSG00000005610	45621.1	0.0664171	0.0801061	0.829114	0.40704	0.616918
ENSMUSG00000005611	75.2991	0.104649	0.257251	0.406796	0.684158	0.832448
ENSMUSG00000005615	1455.85	-0.0596364	0.088362	-0.674909	0.499733	0.6987
ENSMUSG00000005621	1380.5	0.161614	0.140959	1.14653	0.251577	0.449681
ENSMUSG00000005625	2486.57	0.159874	0.0790908	2.0214	0.0432384	0.121115
ENSMUSG00000005628	102.746	0.180202	0.220232	0.818239	0.413221	0.622815
ENSMUSG00000005640	114.192	0.203908	0.291821	0.698742	0.484713	0.686724
ENSMUSG00000005649	8.46479	-0.719417	0.601455	-1.19613	0.231646	0.42446
ENSMUSG00000005656	1770.98	-0.11405	0.0935657	-1.21893	0.222872	0.413473
ENSMUSG00000005667	403.443	-0.071627	0.114332	-0.626482	0.530999	0.723861
ENSMUSG00000005672	1914.39	-0.0220275	0.0867482	-0.253924	0.799554	0.899718
ENSMUSG00000005674	187.398	0.281163	0.151481	1.8561	0.0634397	0.163882
ENSMUSG00000005677	21.112	0.383489	0.358861	1.06863	0.285237	0.490885
ENSMUSG00000005681	9.61899	0.170279	0.927258	0.183637	0.854298	0.930375
ENSMUSG00000005682	2158.57	0.384367	0.117549	3.26985	0.00107606	0.00520882
ENSMUSG00000005683	5406.75	0.171224	0.0714563	2.39621	0.0165657	0.0550813
ENSMUSG00000005686	158.094	-0.848095	0.18873	-4.49369	7.00004e-06	5.36683e-05
ENSMUSG00000005687	1974.26	-0.226305	0.101896	-2.22095	0.0263545	0.0807089
ENSMUSG00000005696	1.34397	-0.642045	1.37304	-0.467609	0.640064	1
ENSMUSG00000005698	4081.95	0.447245	0.0988747	4.52335	6.0868e-06	4.73048e-05
ENSMUSG00000005699	222.958	0.163995	0.155432	1.05509	0.291385	0.497466
ENSMUSG00000005705	18.2006	-0.526692	0.452067	-1.16507	0.243989	0.440083
ENSMUSG00000005716	25.429	-4.39756	0.591047	-7.44029	1.00462e-13	1.81515e-12
ENSMUSG00000005718	320.022	0.738261	0.112683	6.55164	5.69073e-11	8.13885e-10
ENSMUSG00000005732	2499	0.488845	0.105254	4.64444	3.40999e-06	2.77038e-05
ENSMUSG00000005763	20.0962	-0.492362	0.446151	-1.10358	0.269776	0.471948
ENSMUSG00000005774	662.103	0.196631	0.133947	1.46798	0.142109	0.300234
ENSMUSG00000005779	2111.86	0.0579211	0.168951	0.342827	0.731729	0.860511
ENSMUSG00000005800	0.168239	0.745756	3.53381	0.211035	0.83286	1
ENSMUSG00000005802	685.18	-0.105758	0.104552	-1.01154	0.31176	0.520968
ENSMUSG00000005803	52.5169	0.372526	0.246168	1.5133	0.130204	0.281206
ENSMUSG00000005804	1585.46	-0.225888	0.0750101	-3.01144	0.00260014	0.0113515
ENSMUSG00000005813	1240.84	-0.0341216	0.0875618	-0.389686	0.696769	0.840204
ENSMUSG00000005823	439.733	0.117288	0.125742	0.932765	0.350941	0.563045
ENSMUSG00000005824	2.0633	0.156889	1.097	0.143016	0.886277	1
ENSMUSG00000005836	9.96676	-0.625398	0.591312	-1.05764	0.290217	0.496392
ENSMUSG00000005846	2221.22	0.187898	0.117638	1.59725	0.11021	0.248935
ENSMUSG00000005864	3.46783	-0.732247	0.8706	-0.841083	0.400302	0.611375
ENSMUSG00000005871	14129.5	-0.0883142	0.0961019	-0.918964	0.358114	0.569904
ENSMUSG00000005873	3117.84	-0.922016	0.114019	-8.08652	6.13921e-16	1.3179e-14
ENSMUSG00000005881	2336.4	-0.153337	0.103515	-1.48131	0.138525	0.294755
ENSMUSG00000005882	644.815	-0.00744252	0.120588	-0.0617187	0.950787	0.978418
ENSMUSG00000005883	15.8991	-0.440231	0.493331	-0.892365	0.372197	0.584211
ENSMUSG00000005886	2798.09	0.0876608	0.128202	0.683769	0.494121	0.694646
ENSMUSG00000005891	0.591815	-2.67927	2.15414	-1.24377	0.213583	1
ENSMUSG00000005892	35.9217	-0.155006	0.348096	-0.445297	0.656105	0.814102
ENSMUSG00000005893	2119.72	0.236811	0.103103	2.29684	0.0216277	0.0688767
ENSMUSG00000005897	443.527	-0.192671	0.115185	-1.67271	0.0943848	0.221434
ENSMUSG00000005899	1937.17	0.33976	0.0828139	4.10269	4.0837e-05	0.000273717
ENSMUSG00000005907	688.838	-0.0918365	0.0854195	-1.07512	0.282319	0.487463
ENSMUSG00000005917	1025.77	0.495617	0.207066	2.39352	0.0166876	0.0554282
ENSMUSG00000005936	3023.78	0.142343	0.0938576	1.51659	0.129371	0.279928
ENSMUSG00000005947	22.5737	1.23148	0.401239	3.06919	0.00214637	0.00960071
ENSMUSG00000005949	675.474	-0.00997046	0.0916782	-0.108755	0.913397	0.96096
ENSMUSG00000005950	16.779	1.47744	0.420376	3.51456	0.000440482	0.00235017
ENSMUSG00000005951	44.1633	-0.539759	0.25961	-2.07912	0.0376067	0.10816
ENSMUSG00000005952	5.71046	-4.03373	1.14961	-3.50878	0.000450159	0.00239602
ENSMUSG00000005958	647.1	-0.818012	0.135701	-6.02805	1.65946e-09	2.05104e-08
ENSMUSG00000005968	78.193	-0.407434	0.19838	-2.05381	0.0399944	0.113515
ENSMUSG00000005973	1498.56	0.201477	0.0970155	2.07675	0.0378243	0.108615
ENSMUSG00000005980	280.813	-0.123581	0.136897	-0.902728	0.36667	0.578669
ENSMUSG00000005981	1240.27	0.169418	0.0996309	1.70046	0.0890444	0.211976
ENSMUSG00000005982	1253.88	-0.0751779	0.0943454	-0.796838	0.425545	0.633929
ENSMUSG00000005983	75.6369	-0.0426689	0.238823	-0.178664	0.858202	0.932288
ENSMUSG00000005986	750.047	-1.09899	0.143981	-7.63284	2.29642e-14	4.42509e-13
ENSMUSG00000005994	7.91943	1.15583	0.791408	1.46047	0.14416	0.303434
ENSMUSG00000006005	6797.26	0.275564	0.157332	1.75149	0.0798623	0.195745
ENSMUSG00000006007	0.50914	0.0505527	2.73021	0.018516	0.985227	1
ENSMUSG00000006010	1078.2	0.000929878	0.146473	0.00634846	0.994935	0.998107
ENSMUSG00000006014	20.1929	0.0642027	0.478716	0.134114	0.893312	0.951223
ENSMUSG00000006019	699.876	0.056322	0.125989	0.447039	0.654847	0.813617
ENSMUSG00000006021	488.146	-0.127288	0.116756	-1.09021	0.27562	0.47924
ENSMUSG00000006024	1987.11	0.0255099	0.101041	0.252471	0.800677	0.900338
ENSMUSG00000006050	690.017	-0.325554	0.157297	-2.06967	0.0384831	0.110062
ENSMUSG00000006056	0.725091	0.588033	1.90636	0.308459	0.757733	1
ENSMUSG00000006057	167.318	0.0119414	0.185188	0.0644824	0.948586	0.977178
ENSMUSG00000006058	835.333	-0.154412	0.131975	-1.17001	0.241996	0.437743
ENSMUSG00000006095	1561.96	-0.161352	0.109066	-1.4794	0.139034	0.295539
ENSMUSG00000006127	1153.74	0.26055	0.108456	2.40235	0.0162901	0.054362
ENSMUSG00000006134	2541.85	0.281496	0.0871138	3.23136	0.00123203	0.00587983
ENSMUSG00000006143	2.10161	-1.85466	1.39204	-1.33233	0.182751	1
ENSMUSG00000006154	38.4513	-0.960166	0.277544	-3.45951	0.000541164	0.0028211
ENSMUSG00000006169	1933.2	0.208645	0.118705	1.75767	0.0788031	0.193623
ENSMUSG00000006179	0.761288	1.47204	1.90345	0.773354	0.439313	1
ENSMUSG00000006191	292.748	0.348053	0.140002	2.48605	0.012917	0.0446479
ENSMUSG00000006200	0.1123	0.745756	3.53381	0.211035	0.83286	1
ENSMUSG00000006204	0.744041	-0.853506	1.94563	-0.438679	0.660894	1
ENSMUSG00000006205	220.99	1.42139	0.183581	7.74258	9.74212e-15	1.92785e-13
ENSMUSG00000006215	1288.49	0.300254	0.0829527	3.61958	0.000295085	0.0016458
ENSMUSG00000006216	0.728408	-3.00707	2.74644	-1.0949	0.273562	1
ENSMUSG00000006218	244.83	-1.01102	0.200882	-5.03292	4.83055e-07	4.4177e-06
ENSMUSG00000006219	791.722	-0.781273	0.127878	-6.10949	9.9947e-10	1.26586e-08
ENSMUSG00000006221	4.01436	1.50669	1.01663	1.48204	0.138329	0.294453
ENSMUSG00000006235	31.3044	0.20293	0.365224	0.55563	0.578464	0.761273
ENSMUSG00000006241	230.11	-0.649356	0.137987	-4.70592	2.5272e-06	2.08548e-05
ENSMUSG00000006262	1362.17	0.250335	0.123053	2.03436	0.0419151	0.118024
ENSMUSG00000006269	4.46773	2.22327	0.915698	2.42795	0.0151844	0.0512664
ENSMUSG00000006270	112.482	2.14636	0.757346	2.83406	0.00459608	0.0185864
ENSMUSG00000006273	3945.22	-0.360973	0.0901419	-4.0045	6.21491e-05	0.000403191
ENSMUSG00000006276	3223.94	0.270509	0.100056	2.70359	0.00685958	0.0262981
ENSMUSG00000006281	280.167	-0.161639	0.142048	-1.13792	0.255152	0.453973
ENSMUSG00000006288	1647.12	-0.137594	0.0990759	-1.38878	0.164901	0.334433
ENSMUSG00000006289	471.594	0.308711	0.102472	3.01265	0.00258982	0.01132
ENSMUSG00000006299	2227.58	0.0996412	0.080669	1.23519	0.216761	0.405863
ENSMUSG00000006301	150.154	0.187277	0.160395	1.1676	0.242968	0.438744
ENSMUSG00000006304	4016.68	0.00769925	0.107518	0.0716089	0.942913	0.974675
ENSMUSG00000006307	4627.97	0.248296	0.147694	1.68115	0.0927329	0.218443
ENSMUSG00000006310	15.6314	-0.360671	0.410873	-0.877817	0.380043	0.591828
ENSMUSG00000006311	0.228601	-1.47328	3.51494	-0.419149	0.675107	1
ENSMUSG00000006313	25.8502	-0.196094	0.370215	-0.529676	0.596337	0.772471
ENSMUSG00000006315	796.693	0.0432172	0.141587	0.305234	0.760188	0.877891
ENSMUSG00000006333	8312.06	0.260705	0.102881	2.53406	0.0112751	0.0399187
ENSMUSG00000006335	351.795	-0.0388393	0.137226	-0.283032	0.777153	0.887698
ENSMUSG00000006342	84.3951	-0.557595	0.203054	-2.74604	0.00603191	0.023568
ENSMUSG00000006344	72.8982	0.65935	0.200135	3.29452	0.000985894	0.00481791
ENSMUSG00000006345	32.61	-0.256741	0.307894	-0.833862	0.404359	0.614588
ENSMUSG00000006356	2171.75	0.20543	0.139684	1.47067	0.14138	0.299039
ENSMUSG00000006360	39.6777	0.505624	0.322124	1.56965	0.116496	0.259435
ENSMUSG00000006362	1659.63	-0.285052	0.149185	-1.91072	0.0560405	0.148352
ENSMUSG00000006369	619.152	0.683153	0.160978	4.24378	2.19787e-05	0.00015397
ENSMUSG00000006373	5441.72	-0.715716	0.129417	-5.53033	3.19629e-08	3.44077e-07
ENSMUSG00000006378	24.8397	0.926137	0.419132	2.20966	0.0271289	0.0827125
ENSMUSG00000006386	361.23	0.19729	0.162269	1.21583	0.224051	0.414961
ENSMUSG00000006389	2.14912	-0.19309	1.08389	-0.178146	0.858608	1
ENSMUSG00000006390	272.059	0.231148	0.163189	1.41644	0.156646	0.322021
ENSMUSG00000006392	818.778	0.210044	0.0864361	2.43005	0.0150968	0.0510137
ENSMUSG00000006395	239.302	0.0895259	0.162089	0.552324	0.580726	0.762929
ENSMUSG00000006398	941.194	1.78768	0.122047	14.6474	1.39924e-48	2.05454e-46
ENSMUSG00000006403	138.185	0.630616	0.183129	3.44355	0.000574121	0.00296692
ENSMUSG00000006411	27.1397	-2.05857	0.354188	-5.81207	6.17053e-09	7.20223e-08
ENSMUSG00000006412	1246.67	-0.139595	0.118559	-1.17743	0.239024	0.43415
ENSMUSG00000006418	1992.42	0.128227	0.111755	1.14739	0.251218	0.449333
ENSMUSG00000006423	638.664	0.381645	0.116443	3.27753	0.00104721	0.00508596
ENSMUSG00000006435	420.408	-0.553351	0.154662	-3.57781	0.000346482	0.00190211
ENSMUSG00000006442	1090.3	0.483345	0.134935	3.58205	0.000340907	0.00187571
ENSMUSG00000006445	121.847	-1.11431	0.167511	-6.65218	2.88786e-11	4.24034e-10
ENSMUSG00000006456	1394.21	0.55138	0.122621	4.49664	6.90356e-06	5.31089e-05
ENSMUSG00000006457	27.5837	-1.7486	0.395438	-4.42194	9.78202e-06	7.30939e-05
ENSMUSG00000006462	0.1123	0.745756	3.53381	0.211035	0.83286	1
ENSMUSG00000006463	448.239	-0.0860069	0.12959	-0.663685	0.506892	0.704906
ENSMUSG00000006464	1155.45	-0.115063	0.0903228	-1.27391	0.202697	0.387938
ENSMUSG00000006469	0.078453	-0.696916	3.53381	-0.197214	0.84366	1
ENSMUSG00000006471	464.314	0.363467	0.167404	2.1712	0.0299157	0.0897065
ENSMUSG00000006476	3161.71	0.712843	0.126006	5.6572	1.53859e-08	1.72193e-07
ENSMUSG00000006488	2.21081	0.556857	1.14128	0.487926	0.625602	1
ENSMUSG00000006490	49.2729	0.0234841	1.15867	0.0202682	0.983829	0.992252
ENSMUSG00000006494	743.301	0.201537	0.100701	2.00135	0.0453543	0.125779
ENSMUSG00000006498	4133.72	1.14989	0.177805	6.46715	9.98703e-11	1.39926e-09
ENSMUSG00000006517	598.023	-0.276577	0.11143	-2.48207	0.0130621	0.0450577
ENSMUSG00000006519	78.8761	-0.0753302	0.282802	-0.266371	0.789953	0.894512
ENSMUSG00000006522	27.9882	-1.01997	0.531735	-1.91819	0.0550864	0.146477
ENSMUSG00000006526	428.205	-0.169271	0.133648	-1.26654	0.205318	0.391436
ENSMUSG00000006527	1066.61	0.140823	0.108433	1.2987	0.194046	0.375988
ENSMUSG00000006529	2.33311	0.613035	1.8139	0.337965	0.73539	1
ENSMUSG00000006538	17.0488	0.300421	0.399174	0.752607	0.451686	0.657214
ENSMUSG00000006542	0.473293	0.173802	2.4237	0.0717094	0.942833	1
ENSMUSG00000006546	3.70189	-5.31395	1.33146	-3.99107	6.57748e-05	0.00042496
ENSMUSG00000006567	161.487	-0.283799	0.149328	-1.90051	0.0573668	0.151318
ENSMUSG00000006570	0.1143	-0.696916	3.53381	-0.197214	0.84366	1
ENSMUSG00000006574	129.5	0.226282	0.187364	1.20771	0.227158	0.41885
ENSMUSG00000006575	4232.49	-0.0520645	0.104873	-0.496456	0.619573	0.789339
ENSMUSG00000006576	1885.65	-0.514163	0.115208	-4.46289	8.08601e-06	6.1264e-05
ENSMUSG00000006585	365.262	1.66889	0.16577	10.0675	7.69201e-24	2.81423e-22
ENSMUSG00000006586	3825.51	-0.806898	0.102479	-7.87382	3.43976e-15	7.05408e-14
ENSMUSG00000006587	0.156448	-0.696916	3.53381	-0.197214	0.84366	1
ENSMUSG00000006589	611.184	0.559293	0.124932	4.47676	7.57828e-06	5.7715e-05
ENSMUSG00000006599	1120.21	0.289583	0.129891	2.22943	0.0257856	0.0794194
ENSMUSG00000006611	46.0304	-0.335729	0.311074	-1.07926	0.280473	0.485074
ENSMUSG00000006638	5.72051	-0.0950323	0.652966	-0.145539	0.884285	0.945753
ENSMUSG00000006641	452.641	-0.534616	0.115925	-4.61173	3.99328e-06	3.19942e-05
ENSMUSG00000006642	0.778775	-2.20412	2.10662	-1.04629	0.295429	1
ENSMUSG00000006649	83.8388	-3.85325	0.370945	-10.3877	2.82219e-25	1.14053e-23
ENSMUSG00000006651	8786.9	-0.507703	0.125458	-4.04679	5.19241e-05	0.000340771
ENSMUSG00000006673	3566.08	0.312259	0.104568	2.98619	0.00282475	0.0122014
ENSMUSG00000006675	254.036	-0.780687	0.175084	-4.45892	8.23751e-06	6.22619e-05
ENSMUSG00000006676	4601.78	0.158701	0.108927	1.45696	0.145128	0.304831
ENSMUSG00000006678	611.564	0.852907	0.124158	6.86955	6.44028e-12	1.00458e-10
ENSMUSG00000006699	7820.06	-0.188548	0.0987636	-1.90908	0.0562515	0.148722
ENSMUSG00000006705	830.029	0.499636	0.0940285	5.31366	1.07443e-07	1.07712e-06
ENSMUSG00000006711	171.634	-0.996334	0.159882	-6.23167	4.6148e-10	6.03569e-09
ENSMUSG00000006715	246.861	1.21706	0.149285	8.15256	3.56289e-16	7.75421e-15
ENSMUSG00000006717	216.922	0.464029	0.191923	2.41778	0.0156154	0.0524202
ENSMUSG00000006720	693.79	0.602674	0.149245	4.03815	5.38733e-05	0.000352932
ENSMUSG00000006724	19.4369	0.27894	0.411223	0.678319	0.497569	0.69693
ENSMUSG00000006728	8800.59	0.881172	0.0841822	10.4674	1.21898e-25	5.03718e-24
ENSMUSG00000006731	887.055	-0.385003	0.141746	-2.71615	0.00660456	0.0254622
ENSMUSG00000006732	305.956	0.524605	0.132882	3.9479	7.884e-05	0.000500707
ENSMUSG00000006736	831.967	0.38864	0.0964669	4.02874	5.60772e-05	0.000366173
ENSMUSG00000006740	4136.58	0.043269	0.122973	0.351857	0.724946	0.856595
ENSMUSG00000006763	628.314	0.471002	0.0904262	5.20869	1.90181e-07	1.85096e-06
ENSMUSG00000006764	49.7234	-3.89893	0.365282	-10.6737	1.35078e-26	5.91469e-25
ENSMUSG00000006777	1.06511	-1.6347	1.61776	-1.01047	0.312268	1
ENSMUSG00000006782	327.963	-0.0626152	0.123592	-0.506629	0.612415	0.783574
ENSMUSG00000006784	67.1496	-0.131495	0.218622	-0.60147	0.547527	0.736714
ENSMUSG00000006800	3840.77	-1.1303	0.121455	-9.30634	1.32315e-20	3.98121e-19
ENSMUSG00000006818	1405.5	-0.20771	0.115322	-1.80114	0.0716812	0.180061
ENSMUSG00000006850	237.685	0.146978	0.162999	0.901708	0.367212	0.579068
ENSMUSG00000006906	981.237	-0.28182	0.0898783	-3.13557	0.00171518	0.00786036
ENSMUSG00000006920	845.822	-0.319924	0.110424	-2.89723	0.00376473	0.0156538
ENSMUSG00000006930	5164.57	-0.857419	0.125674	-6.82254	8.94437e-12	1.37474e-10
ENSMUSG00000006931	226.898	-0.289257	0.156361	-1.84993	0.0643243	0.16574
ENSMUSG00000006932	17681.1	0.342934	0.0741716	4.62351	3.77294e-06	3.04169e-05
ENSMUSG00000006941	1913.4	0.285316	0.155763	1.83173	0.0669919	0.170854
ENSMUSG00000006948	8.92977	-2.10184	0.889862	-2.36199	0.0181773	0.0594881
ENSMUSG00000006958	348.833	-0.665749	0.185436	-3.59018	0.000330455	0.00182367
ENSMUSG00000006998	5283.68	-0.0455243	0.124656	-0.365199	0.714963	0.851693
ENSMUSG00000007021	854.846	-0.760382	0.12638	-6.01665	1.78068e-09	2.19226e-08
ENSMUSG00000007029	2245.02	0.132376	0.169216	0.78229	0.434044	0.641427
ENSMUSG00000007030	20.0298	0.556126	0.44699	1.24416	0.213442	0.40204
ENSMUSG00000007033	34.03	-0.0515021	0.315337	-0.163324	0.870263	0.939079
ENSMUSG00000007034	0.676488	-0.984894	1.97483	-0.498724	0.617974	1
ENSMUSG00000007035	141.04	0.534173	0.162773	3.28169	0.00103185	0.00501801
ENSMUSG00000007036	887.061	-0.0543472	0.139211	-0.390395	0.696245	0.840036
ENSMUSG00000007038	577.709	-0.256165	0.123385	-2.07614	0.0378813	0.108722
ENSMUSG00000007039	3541.61	0.361532	0.189022	1.91265	0.0557934	0.147894
ENSMUSG00000007041	1093.97	0.58972	0.175379	3.36255	0.000772253	0.00386565
ENSMUSG00000007050	480.789	0.581771	0.170144	3.41929	0.000627848	0.00321067
ENSMUSG00000007080	1180.09	1.32301	0.146657	9.02109	1.86232e-19	5.15943e-18
ENSMUSG00000007097	3690.58	-0.297791	0.134016	-2.22206	0.0262792	0.0805577
ENSMUSG00000007107	5.28712	0.514748	0.754678	0.682077	0.49519	0.695528
ENSMUSG00000007122	61.446	1.58574	0.229301	6.91554	4.66084e-12	7.33774e-11
ENSMUSG00000007207	1391.95	-0.702509	0.0899234	-7.81231	5.61507e-15	1.13253e-13
ENSMUSG00000007209	0.76136	-0.584075	2.21361	-0.263857	0.79189	1
ENSMUSG00000007216	330.127	0.0826812	0.124974	0.661588	0.508235	0.705833
ENSMUSG00000007279	125.353	-1.5322	0.187312	-8.17994	2.83986e-16	6.24231e-15
ENSMUSG00000007338	983.076	0.227154	0.137669	1.65	0.0989422	0.229583
ENSMUSG00000007379	63.6182	-0.21496	0.207039	-1.03826	0.299149	0.506827
ENSMUSG00000007411	3432.83	-0.0246292	0.112045	-0.219816	0.826015	0.914916
ENSMUSG00000007415	934.794	0.166653	0.109719	1.5189	0.128787	0.278968
ENSMUSG00000007440	42.863	-0.342415	0.288565	-1.18661	0.235381	0.429588
ENSMUSG00000007457	0.433873	0.0191711	2.45742	0.00780132	0.993776	1
ENSMUSG00000007458	1343.09	0.0208101	0.0726108	0.286598	0.77442	0.885735
ENSMUSG00000007476	335.219	0.0816828	0.108751	0.751102	0.452591	0.658019
ENSMUSG00000007480	34.8458	0.580405	0.311994	1.86031	0.0628419	0.162758
ENSMUSG00000007564	8584.1	-0.273996	0.127944	-2.14153	0.0322311	0.0954282
ENSMUSG00000007570	356.836	0.221381	0.204685	1.08157	0.279444	0.483978
ENSMUSG00000007589	700.788	0.619889	0.109252	5.67395	1.39543e-08	1.56967e-07
ENSMUSG00000007591	35.3915	-0.00955124	0.293895	-0.0324988	0.974074	0.988435
ENSMUSG00000007594	34.1393	-1.13803	0.327017	-3.48004	0.000501335	0.00263279
ENSMUSG00000007603	1757.7	-0.274897	0.0923574	-2.97644	0.00291612	0.0125395
ENSMUSG00000007610	370.964	0.153478	0.1534	1.00051	0.317063	0.526919
ENSMUSG00000007613	3013.43	-0.276799	0.0958855	-2.88676	0.00389227	0.0161141
ENSMUSG00000007617	1050.92	0.203666	0.103665	1.96465	0.0494546	0.134857
ENSMUSG00000007646	204.074	0.638862	0.138456	4.61421	3.94601e-06	3.1673e-05
ENSMUSG00000007653	948.457	-1.56862	0.11323	-13.8535	1.21241e-43	1.32195e-41
ENSMUSG00000007655	465.979	1.14952	0.179062	6.41966	1.36576e-10	1.88712e-09
ENSMUSG00000007656	3092.51	-0.0477722	0.12435	-0.384176	0.700848	0.843048
ENSMUSG00000007659	2386.05	-0.0133656	0.110046	-0.121456	0.90333	0.956439
ENSMUSG00000007670	3843.5	0.378403	0.110336	3.42956	0.000604555	0.00310888
ENSMUSG00000007682	19.4171	3.11907	0.494745	6.3044	2.89315e-10	3.85491e-09
ENSMUSG00000007721	1172.78	0.0917022	0.101446	0.903954	0.36602	0.578039
ENSMUSG00000007739	4476.42	0.0351924	0.113743	0.309404	0.757014	0.875787
ENSMUSG00000007777	303.468	-0.094508	0.146021	-0.647224	0.517487	0.713379
ENSMUSG00000007783	1493.07	0.220772	0.134159	1.6456	0.0998461	0.230975
ENSMUSG00000007805	4.79793	-0.999715	0.808311	-1.23679	0.216163	0.405226
ENSMUSG00000007812	835.875	0.00081573	0.141156	0.00577891	0.995389	0.998373
ENSMUSG00000007815	2940.98	0.231404	0.100169	2.31014	0.0208803	0.0669123
ENSMUSG00000007817	12471.7	0.124163	0.202567	0.612945	0.539913	0.730541
ENSMUSG00000007827	2113.14	0.127562	0.486196	0.262368	0.793038	0.896079
ENSMUSG00000007833	405.4	0.363779	0.162407	2.23992	0.0250963	0.0777857
ENSMUSG00000007836	8615.3	0.20626	0.15291	1.3489	0.17737	0.352929
ENSMUSG00000007837	174.345	0.442439	0.152772	2.89608	0.00377857	0.0156995
ENSMUSG00000007850	28654.4	0.198127	0.137782	1.43797	0.150441	0.312829
ENSMUSG00000007867	331.707	0.480693	0.127874	3.75911	0.000170519	0.001006
ENSMUSG00000007872	467.945	-0.421477	0.229873	-1.83352	0.0667252	0.170273
ENSMUSG00000007877	10.9864	0.0562796	0.571776	0.0984294	0.921591	0.965057
ENSMUSG00000007880	10694.4	0.316989	0.177305	1.78782	0.0738049	0.18424
ENSMUSG00000007888	16.3358	0.695255	0.478387	1.45333	0.146131	0.30644
ENSMUSG00000007891	1574.24	-0.076453	0.124236	-0.615383	0.538302	0.729471
ENSMUSG00000007892	5702.17	0.60003	0.149822	4.00496	6.20285e-05	0.000402527
ENSMUSG00000007907	0	NA	NA	NA	NA	1
ENSMUSG00000007908	495.186	-0.806994	0.122188	-6.60451	3.98833e-11	5.77914e-10
ENSMUSG00000007944	456.64	0.133986	0.203867	0.65722	0.511039	0.707724
ENSMUSG00000007946	9.43825	-4.2854	0.935926	-4.57877	4.67707e-06	3.70949e-05
ENSMUSG00000007950	1450.73	-0.260207	0.130711	-1.99071	0.0465132	0.128378
ENSMUSG00000007987	713.969	0.117095	0.0954808	1.22638	0.220057	0.410047
ENSMUSG00000007989	6006.33	0.00328027	0.100231	0.0327269	0.973892	0.988324
ENSMUSG00000008028	33.2302	-0.166974	0.356244	-0.468706	0.63928	0.802347
ENSMUSG00000008035	933.193	0.391084	0.116797	3.3484	0.00081281	0.00405118
ENSMUSG00000008036	1935.65	-0.0671858	0.110574	-0.607609	0.543447	0.733823
ENSMUSG00000008090	238.627	0.919242	0.13876	6.62467	3.4802e-11	5.07289e-10
ENSMUSG00000008129	87.2432	-0.0164865	0.200226	-0.0823397	0.934377	0.970555
ENSMUSG00000008136	96.0881	-0.838048	0.220933	-3.79323	0.000148701	0.00088974
ENSMUSG00000008140	1566.66	0.290434	0.179005	1.62249	0.104699	0.239161
ENSMUSG00000008153	2208.31	-0.980213	0.0870561	-11.2596	2.07796e-29	1.0871e-27
ENSMUSG00000008167	864.284	-0.376006	0.128483	-2.9265	0.00342797	0.0144499
ENSMUSG00000008193	1.23749	1.90556	1.69885	1.12168	0.261998	1
ENSMUSG00000008200	4461.17	0.178539	0.127999	1.39485	0.163062	0.331651
ENSMUSG00000008206	2165.06	-0.462562	0.118088	-3.9171	8.96214e-05	0.000563652
ENSMUSG00000008226	223.467	0.132987	0.14126	0.941438	0.346481	0.558533
ENSMUSG00000008301	1626.18	-0.0879151	0.115682	-0.759972	0.447271	0.654075
ENSMUSG00000008305	2382.72	0.049536	0.110482	0.448363	0.653891	0.813211
ENSMUSG00000008307	52.132	0.25347	0.292747	0.865834	0.386581	0.597757
ENSMUSG00000008318	81.0881	0.147725	0.223922	0.659714	0.509437	0.706438
ENSMUSG00000008333	1112.02	0.0794312	0.128352	0.618855	0.536012	0.727443
ENSMUSG00000008348	1915.05	-0.25532	0.135299	-1.88708	0.0591496	0.155018
ENSMUSG00000008373	1701.79	0.229744	0.101833	2.25609	0.0240649	0.0751709
ENSMUSG00000008384	54.3929	0.488957	0.236277	2.06942	0.0385067	0.110101
ENSMUSG00000008393	3009.5	-0.229101	0.131039	-1.74835	0.0804039	0.196723
ENSMUSG00000008398	518.381	0.591268	0.155894	3.79276	0.000148985	0.000891198
ENSMUSG00000008429	979.486	0.15685	0.0988479	1.58678	0.112562	0.252996
ENSMUSG00000008435	868.535	-0.557186	0.109259	-5.09969	3.40217e-07	3.18302e-06
ENSMUSG00000008438	21.6947	-0.658888	0.354252	-1.85994	0.0628934	0.162834
ENSMUSG00000008450	251.131	1.77	0.812251	2.17913	NA	1
ENSMUSG00000008461	0.848996	0.452367	1.72376	0.262431	0.792989	1
ENSMUSG00000008475	3179.48	-0.023121	0.0886561	-0.260794	0.794251	0.896637
ENSMUSG00000008482	6.41887	0.885406	0.853197	1.03775	0.299386	0.507073
ENSMUSG00000008489	4633.8	-0.136844	0.11751	-1.16453	0.244209	0.440264
ENSMUSG00000008496	2245.61	-0.715333	0.181176	-3.94827	7.87165e-05	0.000500066
ENSMUSG00000008540	202.127	-1.27633	0.198911	-6.41659	1.39356e-10	1.92193e-09
ENSMUSG00000008575	11481	2.12762	0.138718	15.3377	4.27963e-53	8.19642e-51
ENSMUSG00000008590	0.812466	-1.11702	1.86832	-0.597873	0.549925	1
ENSMUSG00000008601	5.85143	-0.0493416	0.762501	-0.0647103	0.948405	0.977154
ENSMUSG00000008604	2891.28	0.376273	0.114394	3.28929	0.00100441	0.00490077
ENSMUSG00000008658	2052.97	-0.768967	0.0897005	-8.57261	1.01166e-17	2.47301e-16
ENSMUSG00000008668	367.075	0.152818	0.13851	1.1033	0.269897	0.472122
ENSMUSG00000008682	455.595	0.10178	0.120018	0.848043	0.396414	0.607629
ENSMUSG00000008683	4599.83	0.0607504	0.141423	0.429564	0.667513	0.821484
ENSMUSG00000008690	2022.99	0.267411	0.14144	1.89062	0.0586746	0.154085
ENSMUSG00000008730	3037.71	0.0930853	0.0950449	0.979382	0.327391	0.537838
ENSMUSG00000008734	796.014	0.845065	0.150354	5.62049	1.90421e-08	2.10543e-07
ENSMUSG00000008763	1862.89	-0.228117	0.0743601	-3.06773	0.00215689	0.00964187
ENSMUSG00000008789	80.0922	-0.696758	1.19301	-0.584033	0.559198	0.746581
ENSMUSG00000008813	0	NA	NA	NA	NA	1
ENSMUSG00000008822	226.428	-0.170833	0.141939	-1.20357	0.228757	0.420906
ENSMUSG00000008843	1.60852	-0.496694	1.38864	-0.357684	0.72058	1
ENSMUSG00000008845	13.9327	-0.645273	0.650252	-0.992342	0.321031	0.530873
ENSMUSG00000008855	2875.7	0.50653	0.121537	4.16772	3.07666e-05	0.000210838
ENSMUSG00000008859	3497.3	-0.0773949	0.0892783	-0.866894	0.386	0.597236
ENSMUSG00000008874	0.278462	-1.54244	3.51223	-0.439162	0.660544	1
ENSMUSG00000008892	1309.33	-0.337135	0.128737	-2.61879	0.00882422	0.0324572
ENSMUSG00000008932	5.01638	1.92169	1.32053	1.45524	0.145601	0.305649
ENSMUSG00000008958	2553.44	0.388036	0.105037	3.69428	0.000220509	0.00126973
ENSMUSG00000008976	1645.77	0.331036	0.12324	2.68612	0.00722872	0.0274457
ENSMUSG00000008999	475.246	0.177564	0.254501	0.697695	0.485368	0.687077
ENSMUSG00000009013	3674.02	0.372196	0.0952874	3.90604	9.38221e-05	0.000586888
ENSMUSG00000009030	1515.07	0.0127576	0.101665	0.125487	0.900138	0.9547
ENSMUSG00000009035	1236.18	0.148486	0.132842	1.11777	0.263667	0.464395
ENSMUSG00000009047	0	NA	NA	NA	NA	1
ENSMUSG00000009070	3.97553	-0.704131	0.826681	-0.851757	0.394349	0.605556
ENSMUSG00000009073	4637.07	0.123522	0.0957128	1.29054	0.196862	0.380007
ENSMUSG00000009075	82.6358	0.321765	0.240176	1.33971	0.180341	0.35665
ENSMUSG00000009076	122.476	0.175941	0.1827	0.963004	0.335546	0.547186
ENSMUSG00000009079	12438.9	0.414626	0.129435	3.20335	0.00135838	0.00640531
ENSMUSG00000009090	2463.55	-0.206326	0.0986703	-2.09107	0.036522	0.105564
ENSMUSG00000009092	30.8437	0.942204	0.305602	3.08311	0.00204851	0.00922289
ENSMUSG00000009093	0.150498	0.745756	3.53381	0.211035	0.83286	1
ENSMUSG00000009097	30.3839	0.742807	0.350769	2.11765	0.0342048	0.10021
ENSMUSG00000009108	7.32276	-0.380104	0.643452	-0.590726	0.554704	0.742561
ENSMUSG00000009112	1659.41	0.318907	0.0765096	4.1682	3.07018e-05	0.00021046
ENSMUSG00000009114	0.40774	-1.09277	2.82526	-0.386787	0.698914	1
ENSMUSG00000009115	2.23865	-0.871472	1.1044	-0.789088	0.43006	1
ENSMUSG00000009145	48.4368	-0.0774231	0.284379	-0.272253	0.785427	0.892255
ENSMUSG00000009185	0	NA	NA	NA	NA	1
ENSMUSG00000009207	1021.64	-0.416983	0.135347	-3.08084	0.00206421	0.0092803
ENSMUSG00000009210	0.868783	-1.42884	1.73789	-0.822168	0.410981	1
ENSMUSG00000009214	0.383048	-0.810113	2.90949	-0.278439	0.780676	1
ENSMUSG00000009216	102.966	0.193394	0.203105	0.95219	0.341001	0.553006
ENSMUSG00000009246	52.2576	0.373198	0.25801	1.44645	0.148052	0.309466
ENSMUSG00000009248	2.02434	-0.97714	1.13154	-0.863547	0.387837	1
ENSMUSG00000009281	34.7232	-0.713846	0.312957	-2.28097	0.02255	0.0712791
ENSMUSG00000009291	917.748	0.239362	0.0808185	2.96173	0.00305918	0.0130781
ENSMUSG00000009292	172.232	-0.507843	0.166469	-3.05067	0.00228333	0.0101269
ENSMUSG00000009293	1065.52	0.599001	0.103706	5.77595	7.65184e-09	8.84217e-08
ENSMUSG00000009350	6.95747	0.290027	0.645854	0.449059	0.653389	0.8129
ENSMUSG00000009356	15.9523	-1.22889	0.461883	-2.66061	0.00779994	0.0293013
ENSMUSG00000009376	128.728	-0.782008	0.174257	-4.48768	7.20036e-06	5.50844e-05
ENSMUSG00000009378	85.1883	-0.358112	0.216839	-1.65151	0.0986352	0.229007
ENSMUSG00000009394	974.006	-0.0014069	0.132805	-0.0105937	0.991548	0.996615
ENSMUSG00000009406	1648.88	0.274767	0.104935	2.61846	0.00883285	0.0324766
ENSMUSG00000009418	8259.72	0.177078	0.136946	1.29305	0.195993	0.378845
ENSMUSG00000009470	5981.57	-0.0645879	0.101301	-0.637584	0.523745	0.718318
ENSMUSG00000009471	0.591357	-2.64035	2.53047	-1.04342	0.296753	1
ENSMUSG00000009487	6.48739	-2.12023	0.826324	-2.56585	0.0102922	0.0369617
ENSMUSG00000009535	1639.5	-0.250485	0.137084	-1.82724	0.0676643	0.17213
ENSMUSG00000009545	27.8016	-0.103791	0.348809	-0.29756	0.766039	0.881233
ENSMUSG00000009549	1755.54	-0.0161755	0.092772	-0.174358	0.861584	0.933787
ENSMUSG00000009551	65.6922	-0.150986	0.234558	-0.643705	0.519767	0.714982
ENSMUSG00000009555	1438.35	-0.0175161	0.0774169	-0.226256	0.821002	0.912017
ENSMUSG00000009563	505.918	0.433186	0.140514	3.08288	0.00205008	0.00922619
ENSMUSG00000009566	343.902	0.0669269	0.122276	0.547344	0.584143	0.765061
ENSMUSG00000009569	1148.64	0.217911	0.117988	1.8469	0.0647617	0.166571
ENSMUSG00000009575	11380.9	0.0798638	0.104735	0.762531	0.445743	0.652455
ENSMUSG00000009580	0	NA	NA	NA	NA	1
ENSMUSG00000009585	153.651	1.68272	0.178814	9.41046	4.93948e-21	1.53013e-19
ENSMUSG00000009588	0.482898	0.956363	2.74929	0.347858	0.727947	1
ENSMUSG00000009596	14.1127	-1.12154	0.551738	-2.03274	0.0420784	0.118364
ENSMUSG00000009614	107.759	-0.464762	0.195128	-2.38183	0.017227	0.0569108
ENSMUSG00000009621	1913.89	-0.183934	0.111967	-1.64274	0.100436	0.232072
ENSMUSG00000009628	187.984	-0.286899	0.232675	-1.23305	0.217558	0.406973
ENSMUSG00000009630	1805.88	0.06567	0.0700289	0.937755	0.34837	0.56043
ENSMUSG00000009633	20.7878	-0.349016	0.39163	-0.891187	0.372829	0.584748
ENSMUSG00000009640	701.965	0.0273856	0.130163	0.210395	0.833359	0.918934
ENSMUSG00000009646	0.271206	-1.66805	3.50759	-0.475555	0.634392	1
ENSMUSG00000009647	558.92	0.0634152	0.106047	0.597994	0.549844	0.738686
ENSMUSG00000009654	6.39261	-0.34675	0.689889	-0.502617	0.615234	0.785993
ENSMUSG00000009670	1.88619	-1.08294	1.5535	-0.697094	0.485744	1
ENSMUSG00000009681	3590.76	-0.182045	0.0906223	-2.00884	0.0445545	0.124044
ENSMUSG00000009687	145.023	0.269822	0.220915	1.22138	0.221941	0.412232
ENSMUSG00000009731	206.038	0.0857764	0.17944	0.478023	0.632634	0.798313
ENSMUSG00000009733	1203.27	-0.214639	0.0914489	-2.34709	0.0189206	0.0615095
ENSMUSG00000009734	343.613	-2.31769	0.175427	-13.2118	7.5054e-40	6.85919e-38
ENSMUSG00000009739	4256.42	0.257284	0.118321	2.17446	0.029671	0.0890816
ENSMUSG00000009741	4843.07	0.147297	0.100585	1.4644	0.143085	0.301834
ENSMUSG00000009772	655.453	-0.660171	0.116258	-5.67848	1.35898e-08	1.53338e-07
ENSMUSG00000009828	2618.74	-0.224965	0.103691	-2.16957	0.0300393	0.0899913
ENSMUSG00000009863	2467.73	0.150432	0.114441	1.3145	0.188679	0.36818
ENSMUSG00000009876	14.5398	-0.112249	0.483238	-0.232286	0.816316	0.90945
ENSMUSG00000009894	3451.72	-0.600577	0.119858	-5.01074	5.4222e-07	4.9247e-06
ENSMUSG00000009900	37.8761	1.55655	0.281925	5.52113	3.3683e-08	3.61183e-07
ENSMUSG00000009905	463.634	-0.156693	0.109445	-1.43171	0.152228	0.31556
ENSMUSG00000009907	1251.37	0.289673	0.0980636	2.95393	0.00313755	0.0133742
ENSMUSG00000009927	1548.19	0.184919	0.122628	1.50796	0.131564	0.283199
ENSMUSG00000009941	6.00945	-0.742847	0.658626	-1.12787	0.259373	0.459367
ENSMUSG00000009995	1145.58	-0.243147	0.134982	-1.80133	0.0716516	0.180028
ENSMUSG00000010021	43.0773	-0.0786704	0.268331	-0.293184	0.769381	0.882791
ENSMUSG00000010025	701.875	0.129127	0.0901684	1.43207	0.152124	0.315375
ENSMUSG00000010044	80.4772	0.17643	0.207656	0.849626	0.395533	0.6066
ENSMUSG00000010045	569.776	0.0602977	0.130648	0.461528	0.64442	0.806348
ENSMUSG00000010047	920.664	0.219024	0.113322	1.93275	0.0532671	0.142726
ENSMUSG00000010048	205.8	0.498344	0.124849	3.99158	6.5634e-05	0.0004243
ENSMUSG00000010051	142.85	0.562452	0.216137	2.60229	0.00926026	0.0338181
ENSMUSG00000010054	954.632	-0.115822	0.109598	-1.05678	0.29061	0.496779
ENSMUSG00000010057	789.234	0.034382	0.0911881	0.377045	0.70614	0.846198
ENSMUSG00000010064	712.303	0.209603	0.184299	1.1373	0.255415	0.454354
ENSMUSG00000010066	3516.24	-0.66649	0.118087	-5.64408	1.66071e-08	1.84919e-07
ENSMUSG00000010067	199.935	0.0847204	0.135948	0.623181	0.533166	0.725228
ENSMUSG00000010080	22.353	-0.770988	0.359782	-2.14293	0.0321187	0.0951594
ENSMUSG00000010086	977.038	-0.713881	0.125372	-5.6941	1.24021e-08	1.40296e-07
ENSMUSG00000010095	2114.81	0.163315	0.137988	1.18355	0.236592	0.431013
ENSMUSG00000010097	5675.68	0.0784968	0.0651094	1.20561	0.227967	0.419848
ENSMUSG00000010110	1969.23	0.0144127	0.0940937	0.153174	0.878261	0.942702
ENSMUSG00000010122	2.3431	-0.350925	1.11719	-0.314113	0.753435	1
ENSMUSG00000010136	19.5088	0.157223	0.457778	0.343448	0.731261	0.860227
ENSMUSG00000010142	18.1242	-0.0378629	0.427301	-0.0886095	0.929392	0.968154
ENSMUSG00000010154	702.139	-0.426465	0.103489	-4.12089	3.77418e-05	0.000254755
ENSMUSG00000010175	1269.55	-0.0609428	0.171574	-0.355199	0.72244	0.855378
ENSMUSG00000010205	0.785075	-2.20716	2.02102	-1.0921	0.274788	1
ENSMUSG00000010277	4928.2	0.198834	0.0810937	2.4519	0.0142103	0.0484491
ENSMUSG00000010290	1141.76	-0.275807	0.108736	-2.53649	0.0111971	0.0397
ENSMUSG00000010307	207.133	0.111084	0.191597	0.579781	0.562063	0.74868
ENSMUSG00000010311	137.565	0.0397858	0.219987	0.180855	0.856481	0.931595
ENSMUSG00000010342	13.9532	-0.427728	0.442776	-0.966015	0.334037	0.545217
ENSMUSG00000010358	20.6406	0.0358812	0.360121	0.0996363	0.920633	0.964537
ENSMUSG00000010362	130.008	1.39198	0.186971	7.44491	9.70114e-14	1.75963e-12
ENSMUSG00000010376	1754.35	0.179505	0.111956	1.60336	0.108855	0.246558
ENSMUSG00000010392	1224.59	0.116254	0.109664	1.06009	0.289103	0.495024
ENSMUSG00000010406	672.286	0.24671	0.189621	1.30107	0.193234	0.374976
ENSMUSG00000010435	0.156448	-0.696916	3.53381	-0.197214	0.84366	1
ENSMUSG00000010453	2252.84	-0.10294	0.0720332	-1.42906	0.152986	0.316707
ENSMUSG00000010461	190.966	1.38123	0.210079	6.57479	4.87207e-11	7.02273e-10
ENSMUSG00000010476	6659.64	-4.23618	0.115317	-36.7351	2.01217e-295	1.47727e-291
ENSMUSG00000010492	41.9092	-0.139231	0.298322	-0.466714	0.640705	0.803297
ENSMUSG00000010505	3413.32	0.235457	0.0934132	2.5206	0.0117156	0.0411933
ENSMUSG00000010517	1420.72	-0.261733	0.0935838	-2.79678	0.00516148	0.0205535
ENSMUSG00000010529	6.87451	-0.404472	0.657677	-0.615001	0.538554	0.729629
ENSMUSG00000010538	41.579	0.553047	0.278712	1.98429	0.0472232	0.129979
ENSMUSG00000010554	1311.66	-0.163981	0.112043	-1.46356	0.143314	0.30226
ENSMUSG00000010592	10.2813	-0.399934	0.531283	-0.752769	0.451589	0.657212
ENSMUSG00000010601	0	NA	NA	NA	NA	1
ENSMUSG00000010607	191.662	0.091972	0.155354	0.592016	0.55384	0.7419
ENSMUSG00000010608	7961.36	0.257876	0.155246	1.66108	0.096697	0.225633
ENSMUSG00000010609	178.886	-0.298368	0.150136	-1.98732	0.0468873	0.129291
ENSMUSG00000010651	19.3367	-0.581523	0.451856	-1.28696	0.198107	0.381909
ENSMUSG00000010660	341.586	-0.673163	0.129348	-5.20427	1.94765e-07	1.8939e-06
ENSMUSG00000010663	4700.46	-0.0566858	0.0749397	-0.756419	0.449398	0.655831
ENSMUSG00000010721	655.082	-0.591105	0.109306	-5.4078	6.38047e-08	6.59947e-07
ENSMUSG00000010751	142.167	0.553397	0.210659	2.62698	0.00861466	0.0317926
ENSMUSG00000010755	1175.21	0.0185567	0.0747145	0.248368	0.80385	0.902017
ENSMUSG00000010760	1.00674	-0.650607	1.7518	-0.371393	0.710345	1
ENSMUSG00000010796	1.24806	1.27313	2.2287	0.571243	0.567835	1
ENSMUSG00000010797	2.0009	0.245705	1.18944	0.206572	0.836344	1
ENSMUSG00000010803	437.592	-2.21315	0.131741	-16.7993	2.46943e-63	6.79864e-61
ENSMUSG00000010825	49.9295	0.586777	0.295237	1.98747	0.04687	0.129265
ENSMUSG00000010830	60.4552	-0.132313	0.280573	-0.471581	0.637226	0.80085
ENSMUSG00000010841	0.271206	-1.66805	3.50759	-0.475555	0.634392	1
ENSMUSG00000010911	294.898	0.076486	0.134879	0.56707	0.570667	0.755477
ENSMUSG00000010914	916.62	-0.214497	0.113161	-1.8955	0.0580265	0.15271
ENSMUSG00000010936	1166.25	0.233684	0.125164	1.86703	0.0618975	0.160747
ENSMUSG00000011008	1.7416	-0.383345	1.34847	-0.284282	0.776194	1
ENSMUSG00000011034	2.28883	-1.88353	1.49333	-1.26129	0.207203	1
ENSMUSG00000011096	1303.7	0.611172	0.136318	4.48342	7.34563e-06	5.60698e-05
ENSMUSG00000011114	996.09	0.145303	0.0844218	1.72116	0.0852224	0.205229
ENSMUSG00000011118	0.740232	0.862127	1.94515	0.44322	0.657607	1
ENSMUSG00000011148	31.1719	-0.40517	0.331933	-1.22064	0.222223	0.412554
ENSMUSG00000011154	9.22666	-0.504666	0.540248	-0.934137	0.350233	0.562315
ENSMUSG00000011158	1351.72	0.0755418	0.102745	0.735233	0.462197	0.666474
ENSMUSG00000011171	84.3318	0.670624	0.261567	2.56387	0.0103512	0.0371433
ENSMUSG00000011179	2348.02	0.650349	0.107948	6.02466	1.6947e-09	2.08874e-08
ENSMUSG00000011254	382.506	0.275849	0.106574	2.58833	0.00964417	0.0349478
ENSMUSG00000011256	1304.1	-0.0347923	0.102056	-0.340914	0.733168	0.861243
ENSMUSG00000011257	1097.91	0.307293	0.178106	1.72534	0.0844668	0.203967
ENSMUSG00000011263	22.1127	1.08321	0.397689	2.72377	0.00645408	0.0249695
ENSMUSG00000011267	11.6353	0.50222	0.472088	1.06383	0.287407	0.493232
ENSMUSG00000011305	12.5504	-0.751606	0.54348	-1.38295	0.16668	0.337049
ENSMUSG00000011306	1568.58	-0.00795944	0.083016	-0.0958784	0.923617	0.966168
ENSMUSG00000011349	2.28213	0.710429	1.17122	0.60657	0.544137	1
ENSMUSG00000011350	0	NA	NA	NA	NA	1
ENSMUSG00000011382	178.586	-0.0707345	0.163715	-0.43206	0.665698	0.820435
ENSMUSG00000011427	778.196	-0.167161	0.113899	-1.46763	0.142206	0.300411
ENSMUSG00000011463	1.20336	-1.82825	1.61988	-1.12863	0.259052	1
ENSMUSG00000011486	2.7407	-1.63572	1.17849	-1.38798	0.165143	1
ENSMUSG00000011589	1126.06	-0.550912	0.162209	-3.39631	0.000683013	0.00345984
ENSMUSG00000011632	7.11837	-2.26667	2.13071	-1.06381	NA	1
ENSMUSG00000011658	378.179	0.163393	0.141511	1.15463	0.248243	0.445421
ENSMUSG00000011751	1313.18	-0.971086	0.127564	-7.61256	2.68717e-14	5.13313e-13
ENSMUSG00000011752	253.619	0.0151022	0.264803	0.0570316	0.95452	0.980408
ENSMUSG00000011831	1189.83	0.0167078	0.130719	0.127815	0.898295	0.953906
ENSMUSG00000011832	2908.51	-0.425119	0.081423	-5.22111	1.7785e-07	1.73863e-06
ENSMUSG00000011837	452.792	0.253411	0.150129	1.68795	0.0914202	0.21599
ENSMUSG00000011877	2920.44	0.20247	0.152263	1.32974	0.183605	0.360898
ENSMUSG00000011884	433.959	0.515884	0.132159	3.90353	9.48015e-05	0.000592005
ENSMUSG00000011958	1839.09	0.223361	0.147321	1.51615	0.12948	0.280047
ENSMUSG00000011960	2144.85	0.0039516	0.0877464	0.0450343	0.96408	0.98355
ENSMUSG00000012017	140.396	0.654982	0.304694	2.14964	0.0315839	0.0938691
ENSMUSG00000012042	0.192753	-1.32934	3.52094	-0.377551	0.705764	1
ENSMUSG00000012076	1380.04	-0.019495	0.119696	-0.162871	0.87062	0.939234
ENSMUSG00000012114	1507.88	0.255593	0.116695	2.19028	0.0285042	0.086107
ENSMUSG00000012117	1086.85	0.344499	0.0948674	3.63137	0.00028192	0.00157997
ENSMUSG00000012123	8.28601	-1.46185	0.64195	-2.27721	0.022774	0.0718758
ENSMUSG00000012126	288.794	-0.559963	0.147563	-3.79474	0.000147796	0.00088505
ENSMUSG00000012187	2.39303	-2.0028	1.151	-1.74005	0.0818503	1
ENSMUSG00000012211	2.53314	-0.600747	1.26419	-0.475205	0.634641	1
ENSMUSG00000012282	0.333364	0.692926	3.01036	0.23018	0.817952	1
ENSMUSG00000012296	766.517	0.555164	0.124452	4.46085	8.16348e-06	6.17884e-05
ENSMUSG00000012350	6.01866	-0.75432	0.935564	-0.806273	0.420086	0.628858
ENSMUSG00000012396	2.7364	0.493953	1.30986	0.377104	0.706096	1
ENSMUSG00000012405	1687.24	-0.668058	0.17535	-3.80985	0.000139054	0.000837021
ENSMUSG00000012422	1907.82	-0.0641532	0.115595	-0.554981	0.578908	0.761493
ENSMUSG00000012428	3.14944	-1.04692	0.979237	-1.06912	0.285014	1
ENSMUSG00000012429	419.777	0.125508	0.104724	1.19847	0.230733	0.423421
ENSMUSG00000012443	1478.94	1.82667	0.143279	12.749	3.15718e-37	2.56594e-35
ENSMUSG00000012483	390.315	0.350538	0.152636	2.29656	0.0216442	0.068909
ENSMUSG00000012519	5.41642	0.570294	0.702708	0.811566	0.417041	0.626301
ENSMUSG00000012520	77.5674	-4.33855	1.34869	-3.21686	0.00129601	0.00614391
ENSMUSG00000012535	3387.2	0.337328	0.0886914	3.80339	0.000142727	0.000856558
ENSMUSG00000012609	776.733	0.320255	0.120644	2.65456	0.00794128	0.0297283
ENSMUSG00000012640	789.945	-0.379091	0.180185	-2.1039	0.035387	0.102984
ENSMUSG00000012705	2.58016	-0.45074	1.08908	-0.413874	0.678967	1
ENSMUSG00000012777	10.5018	-0.879539	0.50733	-1.73366	0.0829782	0.201343
ENSMUSG00000012819	320.251	-1.93249	0.151368	-12.7668	2.51273e-37	2.07277e-35
ENSMUSG00000012848	7178.78	0.351536	0.160207	2.19426	0.0282167	0.0853906
ENSMUSG00000012889	7.47956	-0.169411	0.621824	-0.272442	0.785282	0.892182
ENSMUSG00000013033	10357.2	-0.0639197	0.124062	-0.515226	0.606395	0.779131
ENSMUSG00000013076	2241.39	0.376588	0.103431	3.64096	0.000271628	0.00152735
ENSMUSG00000013083	0.1123	0.745756	3.53381	0.211035	0.83286	1
ENSMUSG00000013089	473.813	0.41829	0.121206	3.45105	0.000558401	0.00289687
ENSMUSG00000013091	7.37573	-0.289956	0.68217	-0.425049	0.670801	0.823958
ENSMUSG00000013150	1174.21	-0.487594	0.10982	-4.43994	8.99823e-06	6.76865e-05
ENSMUSG00000013155	248.584	0.834679	0.135541	6.15811	7.36176e-10	9.43788e-09
ENSMUSG00000013158	24.2291	-0.866166	0.349944	-2.47515	0.0133179	0.045825
ENSMUSG00000013160	2444.75	-0.274731	0.0985919	-2.78655	0.00532726	0.0211296
ENSMUSG00000013236	25837.9	0.448277	0.102049	4.39277	1.11913e-05	8.26037e-05
ENSMUSG00000013275	1005.01	0.469536	0.19352	2.42629	0.0152542	0.0514351
ENSMUSG00000013338	1.74319	-1.04798	1.37282	-0.763383	0.445235	1
ENSMUSG00000013353	0.279426	-0.609514	3.17268	-0.192113	0.847654	1
ENSMUSG00000013367	2445.83	-0.355449	0.139854	-2.54157	0.0110356	0.0391968
ENSMUSG00000013415	1752.68	0.851197	0.118523	7.18171	6.8845e-13	1.16819e-11
ENSMUSG00000013418	3.99186	1.43111	0.89644	1.59643	0.110392	0.24922
ENSMUSG00000013419	920.169	-0.0239079	0.119872	-0.199444	0.841915	0.923787
ENSMUSG00000013465	1321.51	-0.316722	0.112935	-2.80446	0.00504006	0.0201246
ENSMUSG00000013483	3.90673	0.31745	0.873928	0.363245	0.716422	0.852263
ENSMUSG00000013495	472.296	0.343886	0.105649	3.25498	0.00113402	0.00547135
ENSMUSG00000013523	355.328	-2.28689	0.179058	-12.7718	2.35606e-37	1.95083e-35
ENSMUSG00000013539	507.142	0.0910778	0.140775	0.646973	0.517649	0.713469
ENSMUSG00000013562	0.347201	-0.61989	2.96737	-0.208902	0.834525	1
ENSMUSG00000013584	184.512	-0.278161	0.330569	-0.84146	0.400091	0.61118
ENSMUSG00000013593	2603.02	0.0710704	0.0965374	0.736195	0.461612	0.665946
ENSMUSG00000013611	2.51146	-1.26409	1.03209	-1.22479	0.220654	1
ENSMUSG00000013622	679.622	-0.0375601	0.129227	-0.290651	0.771318	0.884207
ENSMUSG00000013629	1680.06	0.578001	0.129712	4.45604	8.34882e-06	6.30816e-05
ENSMUSG00000013643	0.1123	0.745756	3.53381	0.211035	0.83286	1
ENSMUSG00000013646	1055.01	-0.0503051	0.117533	-0.42801	0.668644	0.822364
ENSMUSG00000013653	0	NA	NA	NA	NA	1
ENSMUSG00000013662	2546.58	-0.274794	0.121297	-2.26548	0.0234835	0.0736996
ENSMUSG00000013663	2332.98	-0.239643	0.135962	-1.76257	0.0779733	0.192013
ENSMUSG00000013668	0.1143	-0.696916	3.53381	-0.197214	0.84366	1
ENSMUSG00000013698	9523.45	0.356574	0.0731727	4.87305	1.09889e-06	9.54007e-06
ENSMUSG00000013701	81.3576	0.608114	0.287899	2.11225	0.0346652	0.101233
ENSMUSG00000013707	16.5443	-0.0980371	0.440765	-0.222425	0.823983	0.914084
ENSMUSG00000013736	1102.73	-0.0449246	0.121996	-0.368246	0.71269	0.850557
ENSMUSG00000013766	22.1506	6.51318	1.01626	6.40898	1.46492e-10	2.01529e-09
ENSMUSG00000013787	5614.94	-0.071903	0.127579	-0.563598	0.573028	0.757226
ENSMUSG00000013822	930.674	0.299168	0.176236	1.69754	0.0895948	0.212734
ENSMUSG00000013833	1260.51	0.0348965	0.135572	0.257403	0.796868	0.897877
ENSMUSG00000013846	1078.66	1.20193	0.136929	8.77771	1.66843e-18	4.28288e-17
ENSMUSG00000013858	2255.36	0.222479	0.167026	1.332	0.182859	0.36007
ENSMUSG00000013878	402.083	-0.263278	0.134868	-1.95212	0.0509238	0.137958
ENSMUSG00000013921	8211.43	0.644619	0.175398	3.67518	0.000237682	0.00135796
ENSMUSG00000013928	6.34598	0.332889	0.722786	0.460563	0.645112	0.806894
ENSMUSG00000013936	11.4942	2.35891	1.12169	2.10299	NA	1
ENSMUSG00000013973	326.914	0.273932	0.140539	1.94916	0.0512766	0.138776
ENSMUSG00000013974	6.93844	0.539632	0.660869	0.816549	0.414186	0.6238
ENSMUSG00000013997	974.366	0.0589305	0.0965701	0.610235	0.541706	0.732103
ENSMUSG00000014030	1067.21	-6.45758	0.245295	-26.3258	9.72959e-153	1.33934e-149
ENSMUSG00000014039	981.359	0.245573	0.0920852	2.6668	0.00765766	0.0288703
ENSMUSG00000014074	1192.29	0.375502	0.106427	3.52825	0.000418315	0.00224772
ENSMUSG00000014075	301.86	-0.171342	0.168711	-1.01559	0.309824	0.518847
ENSMUSG00000014077	1071.12	0.469795	0.0987469	4.75757	1.9594e-06	1.6434e-05
ENSMUSG00000014104	0	NA	NA	NA	NA	1
ENSMUSG00000014158	28.2162	-0.610413	0.363694	-1.67837	0.0932744	0.219531
ENSMUSG00000014164	568.995	-0.447163	0.0894999	-4.99624	5.84594e-07	5.27476e-06
ENSMUSG00000014177	426.976	-0.447678	0.177008	-2.52914	0.0114341	0.0404038
ENSMUSG00000014195	6055.29	-0.0383425	0.101393	-0.378158	0.705313	0.845973
ENSMUSG00000014198	10.6248	-0.462055	0.535648	-0.862608	0.388353	0.599403
ENSMUSG00000014226	2832.19	0.192662	0.10608	1.81619	0.0693406	0.1754
ENSMUSG00000014232	452.338	-0.321037	0.181937	-1.76455	0.0776396	0.191405
ENSMUSG00000014243	46.4332	0.0582869	0.255235	0.228366	0.819362	0.911056
ENSMUSG00000014245	210.118	0.123195	0.140045	0.879677	0.379035	0.590923
ENSMUSG00000014294	470.583	0.179857	0.263939	0.681434	0.495597	0.695625
ENSMUSG00000014301	137.254	-0.247693	0.162987	-1.5197	0.128585	0.278667
ENSMUSG00000014303	772.901	0.192114	0.162155	1.18475	0.236115	0.430427
ENSMUSG00000014313	1395.16	-0.241485	0.246751	-0.978656	0.32775	0.538268
ENSMUSG00000014329	419.304	-0.183097	0.207488	-0.882444	0.377537	0.589525
ENSMUSG00000014349	1990.54	-0.0790145	0.0707584	-1.11668	0.264131	0.464803
ENSMUSG00000014351	0.676157	0.58221	2.02694	0.287236	0.773932	1
ENSMUSG00000014353	1131.11	-0.134066	0.0819572	-1.63581	0.10188	0.234277
ENSMUSG00000014355	5119.06	0.227754	0.0718733	3.16883	0.00153053	0.00711209
ENSMUSG00000014361	85.2043	-0.124304	0.245292	-0.506757	0.612325	0.783514
ENSMUSG00000014402	2636.46	0.306068	0.13428	2.27933	0.0226473	0.0715649
ENSMUSG00000014418	919.441	0.185197	0.104564	1.77113	0.0765389	0.189349
ENSMUSG00000014426	1580.73	-0.0582161	0.0757035	-0.769001	0.441893	0.648543
ENSMUSG00000014444	428.856	0.465139	0.170305	2.73121	0.00631015	0.0245098
ENSMUSG00000014453	0.164161	-0.696916	3.53381	-0.197214	0.84366	1
ENSMUSG00000014470	505.782	0.274373	0.155404	1.76555	0.0774711	0.191118
ENSMUSG00000014496	1873.54	0.119946	0.115843	1.03542	0.300472	0.50819
ENSMUSG00000014498	4069.65	0.203259	0.149984	1.35521	0.175352	0.349862
ENSMUSG00000014503	273.899	0.0165221	0.155786	0.106056	0.915538	0.962216
ENSMUSG00000014504	919.391	0.0648667	0.113162	0.573219	0.566497	0.752166
ENSMUSG00000014529	0	NA	NA	NA	NA	1
ENSMUSG00000014542	0.0866724	0.745756	3.53381	0.211035	0.83286	1
ENSMUSG00000014543	0.0866724	0.745756	3.53381	0.211035	0.83286	1
ENSMUSG00000014547	1113.33	0.0327871	0.0764109	0.429089	0.667859	0.821765
ENSMUSG00000014550	1478.73	-0.023769	0.0811455	-0.292918	0.769585	0.882884
ENSMUSG00000014551	550.629	0.0200406	0.101442	0.197558	0.843391	0.92467
ENSMUSG00000014554	535.025	0.0302336	0.11488	0.263177	0.792415	0.895707
ENSMUSG00000014592	4803.98	-0.262117	0.0989727	-2.64838	0.00808782	0.0301565
ENSMUSG00000014599	465.957	-0.428349	0.522243	-0.820209	0.412097	0.621844
ENSMUSG00000014601	4984.24	-0.169999	0.0751664	-2.26164	0.0237199	0.0743143
ENSMUSG00000014602	17891.5	-0.3594	0.0992316	-3.62183	0.000292529	0.00163278
ENSMUSG00000014603	29.0414	3.23405	0.624933	5.17504	2.27856e-07	2.19054e-06
ENSMUSG00000014606	1262.89	0.000814569	0.105595	0.00771411	0.993845	0.997629
ENSMUSG00000014609	2.15661	1.29574	1.15032	1.12642	0.25999	1
ENSMUSG00000014633	167.695	0.576352	0.164026	3.51377	0.000441788	0.00235545
ENSMUSG00000014668	2297.93	-0.0459265	0.0880477	-0.521609	0.601943	0.776511
ENSMUSG00000014686	45.2963	-1.93427	0.291853	-6.62757	3.41252e-11	4.98083e-10
ENSMUSG00000014704	20.076	-7.04719	1.28463	-5.48578	4.11638e-08	4.36301e-07
ENSMUSG00000014725	0.661968	-1.87961	2.12844	-0.883092	0.377187	1
ENSMUSG00000014747	61.3777	-0.175101	0.229216	-0.763911	0.44492	0.651597
ENSMUSG00000014748	948.073	0.391391	0.112232	3.48732	0.000487881	0.00256887
ENSMUSG00000014763	1914.54	-0.0226646	0.0787616	-0.287763	0.773529	0.885497
ENSMUSG00000014767	1460.58	0.234745	0.0690139	3.40141	0.000670395	0.00340453
ENSMUSG00000014769	2398.93	0.0241313	0.212015	0.113819	0.909381	0.959341
ENSMUSG00000014771	0	NA	NA	NA	NA	1
ENSMUSG00000014773	1535.86	0.632199	0.0923382	6.84656	7.56477e-12	1.17251e-10
ENSMUSG00000014776	48.9362	-0.25467	0.268389	-0.948887	0.342678	0.554283
ENSMUSG00000014778	376.28	0.219003	0.148613	1.47365	0.140575	0.297902
ENSMUSG00000014782	273.356	-0.513711	0.153272	-3.35163	0.000803363	0.00400862
ENSMUSG00000014786	1154.67	0.138308	0.134428	1.02887	0.303543	0.511204
ENSMUSG00000014791	92.2365	0.336637	0.251235	1.33993	0.180269	0.356635
ENSMUSG00000014813	166.474	0.484792	0.160905	3.01291	0.00258755	0.0113144
ENSMUSG00000014837	3175.95	-0.540181	0.0836739	-6.45578	1.07659e-10	1.50266e-09
ENSMUSG00000014846	489	-1.45104	0.126466	-11.4738	1.78612e-30	9.98458e-29
ENSMUSG00000014850	980.929	0.300936	0.106187	2.83402	0.0045966	0.0185864
ENSMUSG00000014852	2.11875	1.7021	1.30581	1.30347	0.192413	1
ENSMUSG00000014856	386.294	-0.109252	0.153864	-0.710056	0.477669	0.680333
ENSMUSG00000014859	1139.49	0.514778	0.138691	3.7117	0.000205873	0.00119514
ENSMUSG00000014867	2122.08	0.119489	0.0952682	1.25424	0.209754	0.397542
ENSMUSG00000014873	922.998	0.0845119	0.0870019	0.97138	0.331359	0.542268
ENSMUSG00000014905	561.628	-0.161758	0.136703	-1.18328	0.236698	0.431115
ENSMUSG00000014907	301.475	0.362883	0.173325	2.09366	0.0362906	0.105074
ENSMUSG00000014932	836.303	0.0277339	0.141973	0.195346	0.845122	0.925416
ENSMUSG00000014956	5503.93	-0.119815	0.136128	-0.880166	0.37877	0.590714
ENSMUSG00000014959	2015.84	0.10763	0.116977	0.920093	0.357524	0.569173
ENSMUSG00000014980	242.385	0.223458	0.135098	1.65404	0.0981191	0.22813
ENSMUSG00000015001	3.74066	0.364137	0.944238	0.385642	0.699762	0.842265
ENSMUSG00000015002	885.796	-0.00682937	0.113416	-0.0602151	0.951984	0.979059
ENSMUSG00000015013	565.646	-0.340609	0.230011	-1.48084	0.13865	0.294965
ENSMUSG00000015016	338.71	-0.131467	0.115673	-1.13655	0.255727	0.454752
ENSMUSG00000015023	1041.75	0.417243	0.114936	3.63021	0.000283188	0.00158627
ENSMUSG00000015027	166.422	-0.499007	0.191855	-2.60096	0.00929639	0.0339332
ENSMUSG00000015053	267.239	-3.0353	0.223604	-13.5745	5.67603e-42	5.76104e-40
ENSMUSG00000015083	72.7065	0.201491	0.261825	0.769563	0.441559	0.648183
ENSMUSG00000015085	12.0794	0.148032	0.50342	0.294052	0.768718	0.882583
ENSMUSG00000015087	2280.16	0.395829	0.115591	3.42439	0.000616183	0.00315688
ENSMUSG00000015090	382.909	-1.38263	0.901428	-1.53382	0.125073	0.273288
ENSMUSG00000015092	1475.04	0.118534	0.122397	0.968442	0.332824	0.543842
ENSMUSG00000015093	84.1567	-0.223495	0.223499	-0.99998	0.31732	0.527112
ENSMUSG00000015094	4728.17	0.104446	0.121458	0.859932	0.389827	0.600835
ENSMUSG00000015095	1718.81	0.125637	0.123657	1.01601	0.309624	0.51859
ENSMUSG00000015112	244.518	1.11632	0.163146	6.84248	7.78342e-12	1.20555e-10
ENSMUSG00000015120	2438.83	0.336227	0.0884401	3.80175	0.00014368	0.000861809
ENSMUSG00000015126	462.231	-0.0817246	0.188945	-0.432531	0.665355	0.820151
ENSMUSG00000015127	306.374	-0.110139	0.148682	-0.740768	0.458834	0.663569
ENSMUSG00000015133	163.055	0.0930578	0.272289	0.341762	0.73253	0.860926
ENSMUSG00000015134	75.5302	3.7488	0.285025	13.1525	1.64559e-39	1.48541e-37
ENSMUSG00000015143	908.647	0.653682	0.109068	5.99336	2.05549e-09	2.50955e-08
ENSMUSG00000015149	2323.38	0.168611	0.118625	1.42138	0.155206	0.319723
ENSMUSG00000015165	7542.88	0.428472	0.0929885	4.6078	4.0696e-06	3.25701e-05
ENSMUSG00000015176	2539.55	0.313256	0.0909076	3.44587	0.000569219	0.00294434
ENSMUSG00000015189	1917.94	-0.314012	0.0793086	-3.95937	7.51481e-05	0.00047975
ENSMUSG00000015202	156.638	0.657807	0.14939	4.40328	1.06627e-05	7.90725e-05
ENSMUSG00000015214	1100.09	-0.0357521	0.0993385	-0.359902	0.71892	0.853551
ENSMUSG00000015217	3544.58	-0.0509218	0.112442	-0.452873	0.65064	0.810953
ENSMUSG00000015222	37175.8	-0.387643	0.0942206	-4.1142	3.88517e-05	0.000261525
ENSMUSG00000015224	61.4268	-0.0730647	0.234424	-0.311677	0.755286	0.874569
ENSMUSG00000015242	0.320609	-1.7053	3.50628	-0.486358	0.626714	1
ENSMUSG00000015243	2099.39	-0.0939548	0.10981	-0.855609	0.392214	0.603501
ENSMUSG00000015247	701.634	-0.293884	0.144373	-2.03559	0.041792	0.117722
ENSMUSG00000015289	358.934	0.496375	0.230423	2.15419	0.031225	0.0929995
ENSMUSG00000015290	922.139	0.186676	0.126435	1.47646	0.139821	0.296653
ENSMUSG00000015291	14836.6	-0.194802	0.0750201	-2.59666	0.00941341	0.0342582
ENSMUSG00000015305	1069.24	-0.987184	0.100819	-9.79165	1.22285e-22	4.16923e-21
ENSMUSG00000015312	45.4157	0.319047	0.260212	1.22611	0.220158	0.41012
ENSMUSG00000015314	0.785613	3.13488	2.21211	1.41715	0.156439	1
ENSMUSG00000015316	2.20352	1.03597	1.28215	0.807998	0.419092	1
ENSMUSG00000015335	156.331	0.466449	0.197763	2.35862	0.0183429	0.0599322
ENSMUSG00000015337	36.554	-0.183264	0.359391	-0.509929	0.610101	0.782012
ENSMUSG00000015340	16.5639	0.0985585	0.497616	0.198061	0.842997	0.924468
ENSMUSG00000015341	1603.95	0.128992	0.109664	1.17624	0.239499	0.434692
ENSMUSG00000015342	228.601	0.00498764	0.132774	0.0375649	0.970035	0.986609
ENSMUSG00000015354	45.7092	0.358006	0.309687	1.15602	0.247671	0.444685
ENSMUSG00000015355	5.2442	0.65971	0.829112	0.795683	0.426216	0.634414
ENSMUSG00000015357	649.907	-0.045226	0.133026	-0.339978	0.733873	0.861587
ENSMUSG00000015363	751.392	0.0292861	0.152752	0.191724	0.847959	0.926691
ENSMUSG00000015365	2.10955	-1.77095	1.4184	-1.24856	0.211826	1
ENSMUSG00000015377	2402.8	-0.990863	0.140078	-7.07367	1.50886e-12	2.49121e-11
ENSMUSG00000015396	114.074	-1.63506	0.238693	-6.85003	7.38349e-12	1.14522e-10
ENSMUSG00000015401	3.14654	-0.191244	1.04794	-0.182495	0.855194	1
ENSMUSG00000015405	5.83407	-0.770447	0.783486	-0.983358	0.325431	0.535697
ENSMUSG00000015437	0.492484	-2.37801	3.4642	-0.686452	0.492428	1
ENSMUSG00000015441	3.09784	-0.999982	1.10044	-0.908712	0.363502	1
ENSMUSG00000015443	0	NA	NA	NA	NA	1
ENSMUSG00000015451	174.479	-0.333277	0.157471	-2.11644	0.0343077	0.100449
ENSMUSG00000015452	150.038	0.498995	0.177711	2.8079	0.00498651	0.0199325
ENSMUSG00000015461	1946.93	0.0526472	0.198385	0.265379	0.790717	0.894828
ENSMUSG00000015467	48.3829	-0.0467746	0.312625	-0.149619	0.881066	0.944121
ENSMUSG00000015468	411.84	-0.108144	0.134617	-0.80335	0.421773	0.63044
ENSMUSG00000015474	299.76	-0.0135647	0.213087	-0.0636581	0.949242	0.977422
ENSMUSG00000015476	863.924	-0.167347	0.171102	-0.978056	0.328046	0.538553
ENSMUSG00000015478	1137.09	-0.0602702	0.11759	-0.512547	0.608268	0.780626
ENSMUSG00000015484	141.737	-1.90632	0.169598	-11.2403	2.58602e-29	1.34651e-27
ENSMUSG00000015488	2268.69	0.0190457	0.137725	0.138288	0.890013	0.949045
ENSMUSG00000015501	1785.8	0.877185	0.143782	6.10082	1.05526e-09	1.33499e-08
ENSMUSG00000015519	0.391349	-2.06805	3.37071	-0.613536	0.539522	1
ENSMUSG00000015522	1507.15	0.294319	0.11432	2.57453	0.0100377	0.0361891
ENSMUSG00000015533	191.326	-0.125553	0.151932	-0.826375	0.408592	0.618587
ENSMUSG00000015536	501.211	-0.150897	0.186373	-0.809648	0.418143	0.627596
ENSMUSG00000015542	217.899	-0.279164	0.127137	-2.19577	0.0281087	0.0851224
ENSMUSG00000015568	514.448	2.44619	0.119524	20.4661	4.31683e-93	2.26377e-90
ENSMUSG00000015575	449.271	0.455014	0.117916	3.8588	0.000113947	0.000699466
ENSMUSG00000015579	0.986155	2.63535	2.24719	1.17273	0.240905	1
ENSMUSG00000015597	3029.79	-0.183758	0.0958984	-1.91617	0.0553431	0.147001
ENSMUSG00000015599	2956.66	-0.0165812	0.0894272	-0.185415	0.852903	0.929538
ENSMUSG00000015605	859.523	0.567836	0.148926	3.81288	0.000137357	0.000828621
ENSMUSG00000015619	617.788	-5.64171	0.489511	-11.5252	9.84909e-31	5.54798e-29
ENSMUSG00000015627	0.419354	-1.07487	2.80225	-0.383575	0.701294	1
ENSMUSG00000015647	319.063	0.927026	0.252247	3.67507	0.000237782	0.00135818
ENSMUSG00000015652	12.0793	0.914293	0.526114	1.73782	0.082242	0.200042
ENSMUSG00000015653	399.22	0.00981713	0.13099	0.0749456	0.940258	0.973176
ENSMUSG00000015656	4833.23	0.588833	0.158574	3.71329	0.000204581	0.0011889
ENSMUSG00000015659	674.177	-0.223919	0.0921804	-2.42914	0.0151348	0.0511184
ENSMUSG00000015665	0.078453	-0.696916	3.53381	-0.197214	0.84366	1
ENSMUSG00000015668	874.05	0.117291	0.149445	0.784841	0.432547	0.6399
ENSMUSG00000015671	2076.43	-0.062494	0.118013	-0.529554	0.596421	0.77248
ENSMUSG00000015672	762.617	0.0686587	0.100155	0.685523	0.493014	0.693625
ENSMUSG00000015697	3461.46	0.205882	0.104557	1.96908	0.0489436	0.133695
ENSMUSG00000015702	28.5874	0.472298	0.348076	1.35688	0.174818	0.348924
ENSMUSG00000015709	8786.7	-0.422451	0.0693796	-6.08898	1.13635e-09	1.42692e-08
ENSMUSG00000015711	1568.94	-0.439685	0.0801538	-5.48552	4.12256e-08	4.36745e-07
ENSMUSG00000015714	1439.31	0.184615	0.0785579	2.35005	0.0187707	0.0611325
ENSMUSG00000015721	0.173345	1.27678	3.52584	0.362121	0.717261	1
ENSMUSG00000015733	2916.78	-0.11443	0.120023	-0.953404	0.340385	0.552346
ENSMUSG00000015745	1850.73	0.615353	0.128496	4.78887	1.67723e-06	1.41754e-05
ENSMUSG00000015747	773.722	-0.17874	0.104196	-1.71542	0.0862675	0.206954
ENSMUSG00000015748	1346.76	0.289115	0.114269	2.53014	0.0114018	0.0403153
ENSMUSG00000015749	5809.82	0.6211	0.111772	5.55686	2.74666e-08	2.9889e-07
ENSMUSG00000015750	238.161	0.180504	0.184127	0.980323	0.326927	0.537435
ENSMUSG00000015755	3775.89	0.47079	0.154408	3.049	0.00229602	0.0101761
ENSMUSG00000015757	1964.17	0.174142	0.117634	1.48037	0.138774	0.295172
ENSMUSG00000015759	1127.78	-0.0920411	0.0788971	-1.1666	0.243374	0.439225
ENSMUSG00000015766	311.149	-0.570657	0.119132	-4.79013	1.66674e-06	1.40976e-05
ENSMUSG00000015776	1359.77	0.436493	0.113042	3.86134	0.000112767	0.00069338
ENSMUSG00000015787	0	NA	NA	NA	NA	1
ENSMUSG00000015790	555.805	-0.171571	0.130442	-1.31531	0.188407	0.36778
ENSMUSG00000015804	925.769	-0.132417	0.166346	-0.796035	0.426012	0.634326
ENSMUSG00000015806	554.196	-0.172452	0.101973	-1.69115	0.0908081	0.214851
ENSMUSG00000015812	29.6883	0.959953	0.330512	2.90444	0.00367907	0.0153469
ENSMUSG00000015829	1040.78	-0.266598	0.125488	-2.1245	0.0336285	0.0988612
ENSMUSG00000015837	3305.48	-0.198965	0.0831225	-2.39363	0.0166824	0.0554194
ENSMUSG00000015839	387.003	0.651074	0.17293	3.76496	0.000166578	0.000985198
ENSMUSG00000015843	132.15	0.950469	0.161929	5.86967	4.36666e-09	5.16795e-08
ENSMUSG00000015846	618.582	0.348957	0.160514	2.174	0.0297048	0.0891588
ENSMUSG00000015850	17.3984	0.249013	0.416434	0.597964	0.549864	0.738686
ENSMUSG00000015852	189.804	0.114601	0.151041	0.758742	0.448007	0.654638
ENSMUSG00000015854	1.19738	0.346575	1.7577	0.197175	0.84369	1
ENSMUSG00000015869	1430.17	0.158337	0.0912424	1.73534	0.0826799	0.200885
ENSMUSG00000015879	186.501	0.369694	0.201964	1.83049	0.0671769	0.171207
ENSMUSG00000015880	621.683	1.67775	0.128088	13.0984	3.36156e-39	2.96154e-37
ENSMUSG00000015882	1633.84	-0.163724	0.132227	-1.2382	0.215641	0.404693
ENSMUSG00000015889	1157.93	0.079327	0.0966508	0.820759	0.411784	0.621631
ENSMUSG00000015890	2.46864	0.574948	1.25377	0.458574	0.64654	1
ENSMUSG00000015932	4233.83	0.139939	0.0869105	1.61015	0.107366	0.244063
ENSMUSG00000015937	4826.76	0.514178	0.0704049	7.30316	2.81084e-13	4.88624e-12
ENSMUSG00000015942	720.305	-0.334587	0.0886083	-3.77602	0.000159352	0.000946781
ENSMUSG00000015943	166.297	0.468916	0.198292	2.36478	0.0180409	0.059149
ENSMUSG00000015944	2957.98	0.122438	0.111046	1.10259	0.270207	0.472551
ENSMUSG00000015947	31.5567	0.00772342	0.336045	0.0229833	0.981664	0.991507
ENSMUSG00000015950	75.0019	0.215654	0.208169	1.03596	0.300223	0.507905
ENSMUSG00000015957	9.37765	-1.15952	0.531642	-2.18101	0.0291826	0.087807
ENSMUSG00000015961	1832.89	-0.0411094	0.101091	-0.406657	0.68426	0.832448
ENSMUSG00000015962	2.53013	-0.308345	1.06413	-0.289761	0.771999	1
ENSMUSG00000015966	23.6085	-0.619827	0.354568	-1.74812	0.0804432	0.196795
ENSMUSG00000015968	1460.88	-0.637805	0.101873	-6.26079	3.83021e-10	5.03944e-09
ENSMUSG00000015970	21.7948	-1.36535	0.387203	-3.52619	0.000421583	0.00226362
ENSMUSG00000015971	1160.9	0.0110123	0.0912002	0.120749	0.90389	0.956652
ENSMUSG00000015980	157.293	-0.342094	0.161042	-2.12425	0.0336494	0.0988779
ENSMUSG00000015981	366.949	-0.835268	0.142871	-5.84631	5.02597e-09	5.91014e-08
ENSMUSG00000015994	1272.78	-0.500779	0.113996	-4.39294	1.11828e-05	8.25682e-05
ENSMUSG00000016018	2371.99	0.195635	0.141847	1.3792	0.167834	0.33879
ENSMUSG00000016024	108.599	-0.65718	0.727221	-0.903687	0.366161	0.578198
ENSMUSG00000016028	2510.24	1.89216	0.13358	14.1651	1.50757e-45	1.83449e-43
ENSMUSG00000016087	207.768	0.306685	0.225241	1.36159	0.173328	0.346735
ENSMUSG00000016128	229.516	0.07684	0.15921	0.482632	0.629357	0.79597
ENSMUSG00000016150	965.853	-1.01504	0.136554	-7.43324	1.05967e-13	1.91149e-12
ENSMUSG00000016179	753.065	-0.122027	0.122403	-0.996927	0.3188	0.528494
ENSMUSG00000016181	891.779	0.303204	0.0902775	3.35858	0.000783443	0.00391811
ENSMUSG00000016194	25.2766	-3.13371	2.07966	-1.50684	NA	1
ENSMUSG00000016200	1133.81	-0.0472806	0.0993639	-0.475832	0.634194	0.799274
ENSMUSG00000016206	9.82648	0.0538875	0.503937	0.106933	0.914842	0.961969
ENSMUSG00000016239	52.8033	1.15119	0.243711	4.7236	2.31703e-06	1.92285e-05
ENSMUSG00000016252	920.642	-0.121531	0.216394	-0.561619	0.574376	0.758317
ENSMUSG00000016253	1429.1	0.22155	0.0901213	2.45835	0.0139576	0.0477058
ENSMUSG00000016255	10.8875	0.0723743	0.493235	0.146734	0.883342	0.945319
ENSMUSG00000016256	715.008	0.337898	0.0871014	3.87937	0.000104727	0.000648474
ENSMUSG00000016257	1127.6	0.157296	0.0864201	1.82013	0.0687395	0.174362
ENSMUSG00000016262	1176.4	-0.139198	0.10146	-1.37195	0.17008	0.341946
ENSMUSG00000016283	0.637196	0.0492523	2.2067	0.0223194	0.982193	1
ENSMUSG00000016308	631.098	-0.286586	0.147723	-1.94002	0.0523775	0.140943
ENSMUSG00000016319	3325.52	0.107322	0.186472	0.575538	0.564927	0.750952
ENSMUSG00000016327	0.300995	1.72587	3.50814	0.49196	0.622747	1
ENSMUSG00000016344	1083.25	0.58886	0.237578	2.47859	0.0131901	0.0454352
ENSMUSG00000016346	6372.79	-0.352412	0.0909754	-3.87371	0.000107192	0.000662061
ENSMUSG00000016349	1769.15	-0.740986	0.108068	-6.85667	7.04824e-12	1.09476e-10
ENSMUSG00000016356	110.121	-0.390179	0.290455	-1.34334	0.179162	0.355212
ENSMUSG00000016382	696.65	0.217021	0.150427	1.4427	0.149105	0.31093
ENSMUSG00000016386	2273.2	0.834379	0.121474	6.86877	6.47595e-12	1.00943e-10
ENSMUSG00000016409	787.329	-0.526957	0.147738	-3.56684	0.000361318	0.00197421
ENSMUSG00000016427	682.275	-0.328346	0.16986	-1.93303	0.0532322	0.142655
ENSMUSG00000016458	6.58774	-0.995325	0.74765	-1.33127	0.1831	0.360323
ENSMUSG00000016477	968.711	1.01934	0.118191	8.62448	6.43838e-18	1.59332e-16
ENSMUSG00000016481	560.648	0.305752	0.109117	2.80205	0.00507789	0.0202573
ENSMUSG00000016487	945.397	-0.0567221	0.242932	-0.23349	0.815381	0.90897
ENSMUSG00000016493	247.61	0.184174	0.145386	1.26679	0.205229	0.39139
ENSMUSG00000016494	818.82	0.31113	0.159856	1.94631	0.0516172	0.139322
ENSMUSG00000016495	689.554	-0.136195	0.161883	-0.841318	0.40017	0.611259
ENSMUSG00000016496	39.1979	0.0738208	0.29487	0.25035	0.802317	0.901353
ENSMUSG00000016498	0.653009	-1.59858	2.5389	-0.629636	0.528933	1
ENSMUSG00000016503	239.402	0.295988	0.138198	2.14177	0.0322121	0.0953847
ENSMUSG00000016510	352.281	-0.0793462	0.135183	-0.586952	0.557236	0.744683
ENSMUSG00000016520	295.373	0.772003	0.130777	5.90319	3.56548e-09	4.2656e-08
ENSMUSG00000016524	0.477057	-2.32971	3.19418	-0.729361	0.465781	1
ENSMUSG00000016526	347.958	0.321794	0.107809	2.98484	0.00283725	0.0122362
ENSMUSG00000016528	1448.04	0.42638	0.103184	4.13224	3.59246e-05	0.000243234
ENSMUSG00000016529	0.278462	-1.54244	3.51223	-0.439162	0.660544	1
ENSMUSG00000016534	1284.83	-0.0740031	0.0839128	-0.881905	0.377828	0.589729
ENSMUSG00000016541	5918.31	-0.266942	0.132701	-2.01161	0.0442614	0.123431
ENSMUSG00000016552	644.774	0.582914	0.107798	5.40747	6.39229e-08	6.60677e-07
ENSMUSG00000016554	2333.16	0.139729	0.143617	0.972932	0.330587	0.541472
ENSMUSG00000016559	18463.8	-0.0697667	0.108632	-0.64223	0.520724	0.715735
ENSMUSG00000016619	1982.06	0.201241	0.0841385	2.39178	0.0167668	0.0556327
ENSMUSG00000016624	3373.24	0.64612	0.121739	5.30743	1.11179e-07	1.11306e-06
ENSMUSG00000016626	0	NA	NA	NA	NA	1
ENSMUSG00000016637	475.521	0.398803	0.153358	2.60047	0.00930971	0.0339727
ENSMUSG00000016664	708.253	0.0243971	0.0856522	0.284839	0.775767	0.886781
ENSMUSG00000016756	18.4436	0.0659809	0.450847	0.146349	0.883646	0.945386
ENSMUSG00000016757	1293.71	0.182334	0.109273	1.66861	0.0951947	0.222943
ENSMUSG00000016758	3.98243	-0.0327792	0.895222	-0.0366157	0.970791	0.986877
ENSMUSG00000016763	1566.68	0.361939	0.115349	3.13776	0.00170241	0.00781159
ENSMUSG00000016831	2064.55	0.222583	0.0934417	2.38205	0.0172164	0.0568842
ENSMUSG00000016833	354.388	-0.0768726	0.187812	-0.409307	0.682315	0.831515
ENSMUSG00000016918	2361.58	-0.782754	0.162335	-4.82184	1.42241e-06	1.21288e-05
ENSMUSG00000016921	11445.3	0.03392	0.0727372	0.466337	0.640974	0.803498
ENSMUSG00000016933	6177.62	0.155393	0.110054	1.41197	0.15796	0.323774
ENSMUSG00000016940	829.536	-0.0944733	0.112111	-0.842675	0.39941	0.61048
ENSMUSG00000016942	9.14223	-0.644119	0.703045	-0.916185	0.35957	0.571271
ENSMUSG00000016946	1202.55	0.0353888	0.12724	0.278126	0.780916	0.88959
ENSMUSG00000016982	1.08043	1.78926	1.91243	0.935594	0.349482	1
ENSMUSG00000016984	465.457	0.644504	0.148858	4.32965	1.49346e-05	0.000107883
ENSMUSG00000016995	17.7895	-0.298299	0.477619	-0.624553	0.532264	0.724547
ENSMUSG00000016998	0	NA	NA	NA	NA	1
ENSMUSG00000017000	0	NA	NA	NA	NA	1
ENSMUSG00000017002	2.0226	-1.16592	1.37523	-0.847796	0.396551	1
ENSMUSG00000017003	0	NA	NA	NA	NA	1
ENSMUSG00000017004	0	NA	NA	NA	NA	1
ENSMUSG00000017007	1.34635	-0.27961	1.3146	-0.212696	0.831564	1
ENSMUSG00000017009	64.2751	0.131899	0.209992	0.628113	0.52993	0.723148
ENSMUSG00000017049	0	NA	NA	NA	NA	1
ENSMUSG00000017057	141.813	-0.459233	0.191267	-2.401	0.0163503	0.0545099
ENSMUSG00000017064	0.1123	0.745756	3.53381	0.211035	0.83286	1
ENSMUSG00000017119	5828.54	0.226645	0.0812725	2.7887	0.00529194	0.0210236
ENSMUSG00000017132	1255.09	0.0123051	0.0892459	0.137878	0.890337	0.949253
ENSMUSG00000017144	5823.41	-0.753546	0.0769492	-9.79277	1.20939e-22	4.12974e-21
ENSMUSG00000017146	656.284	1.6642	0.114695	14.5098	1.0501e-47	1.45462e-45
ENSMUSG00000017165	2.07769	0.523652	1.30605	0.400943	0.688462	1
ENSMUSG00000017167	267.452	-1.69671	0.203392	-8.34206	7.3008e-17	1.675e-15
ENSMUSG00000017176	1395.85	0.249815	0.103905	2.40426	0.0162053	0.0541282
ENSMUSG00000017188	755.617	0.0313624	0.137858	0.227497	0.820038	0.911457
ENSMUSG00000017195	2.46422	-0.26632	1.09361	-0.243523	0.8076	1
ENSMUSG00000017204	0.957344	-1.2014	2.28909	-0.524838	0.599696	1
ENSMUSG00000017210	3111.36	0.315676	0.115223	2.73969	0.00614965	0.0239643
ENSMUSG00000017211	0.3324	0.0244222	3.53381	0.00691102	0.994486	1
ENSMUSG00000017221	2896.87	0.282041	0.0917646	3.07352	0.00211546	0.00948363
ENSMUSG00000017264	2366.03	0.263202	0.101128	2.60267	0.00925012	0.0337937
ENSMUSG00000017286	887.51	-0.15784	0.0979168	-1.61198	0.106967	0.243574
ENSMUSG00000017288	1393.98	0.00662574	0.0675982	0.0980166	0.921919	0.965285
ENSMUSG00000017291	4604.31	0.0663282	0.0874805	0.758206	0.448328	0.654889
ENSMUSG00000017299	699.069	0.286951	0.108065	2.65535	0.0079226	0.0296811
ENSMUSG00000017300	0.707771	-0.455643	2.52157	-0.180699	0.856604	1
ENSMUSG00000017307	154.93	0.277195	0.182902	1.51554	0.129636	0.280271
ENSMUSG00000017309	3.75958	0.682451	0.875182	0.779783	0.435519	0.643045
ENSMUSG00000017310	0	NA	NA	NA	NA	1
ENSMUSG00000017311	0.706116	-2.93947	2.02845	-1.44912	0.147303	1
ENSMUSG00000017314	1371.7	-0.159878	0.115595	-1.38309	0.166637	0.337032
ENSMUSG00000017316	0.0866724	0.745756	3.53381	0.211035	0.83286	1
ENSMUSG00000017344	947.1	-0.513601	0.389326	-1.31921	0.1871	0.365747
ENSMUSG00000017376	2065.39	0.273895	0.0896735	3.05436	0.00225542	0.0100193
ENSMUSG00000017386	2443.11	0.415508	0.121227	3.42751	0.000609151	0.00312747
ENSMUSG00000017390	1717.98	1.43487	0.121881	11.7727	5.3982e-32	3.26636e-30
ENSMUSG00000017400	232.194	0.148746	0.171026	0.869724	0.384451	0.595509
ENSMUSG00000017404	1757.4	0.315025	0.0958742	3.28582	0.00101687	0.0049506
ENSMUSG00000017405	144.642	0.597628	0.147426	4.05375	5.04034e-05	0.0003317
ENSMUSG00000017412	896.791	-0.475159	0.113006	-4.20473	2.61389e-05	0.000180927
ENSMUSG00000017417	24.0321	-1.31374	0.371664	-3.53475	0.000408166	0.00220083
ENSMUSG00000017418	2011.35	-0.0991292	0.0895046	-1.10753	0.268064	0.469623
ENSMUSG00000017421	8368.49	0.314485	0.116588	2.69741	0.00698811	0.026721
ENSMUSG00000017428	2112.25	0.328289	0.0818326	4.01171	6.02804e-05	0.000392223
ENSMUSG00000017446	105.572	-0.280159	0.192804	-1.45308	0.146202	0.306531
ENSMUSG00000017453	250.369	0.875236	0.12273	7.1314	9.93504e-13	1.66529e-11
ENSMUSG00000017466	2218.59	0.0446159	0.0979893	0.455314	0.648883	0.809889
ENSMUSG00000017478	2710.43	0.466101	0.131551	3.54311	0.00039544	0.00214047
ENSMUSG00000017485	13802.7	0.039499	0.135489	0.29153	0.770646	0.883667
ENSMUSG00000017491	76.2155	1.12591	0.257102	4.37923	1.19097e-05	8.7466e-05
ENSMUSG00000017493	1987.5	0.484599	0.187412	2.58574	0.00971704	0.0351771
ENSMUSG00000017499	370.822	1.85955	0.129269	14.3851	6.41723e-47	8.56603e-45
ENSMUSG00000017548	2277.88	0.582643	0.142765	4.08113	4.48167e-05	0.000298394
ENSMUSG00000017550	1100.26	1.02853	0.133062	7.72972	1.07784e-14	2.11769e-13
ENSMUSG00000017561	315.393	0.628777	0.129149	4.86863	1.12377e-06	9.74448e-06
ENSMUSG00000017588	0.670268	-2.87405	2.07747	-1.38344	0.166531	1
ENSMUSG00000017607	4.37064	0.0323242	0.753947	0.0428733	0.965803	0.984487
ENSMUSG00000017615	2054.25	0.373386	0.083042	4.49636	6.91278e-06	5.31427e-05
ENSMUSG00000017631	7815.47	-0.108633	0.0773803	-1.40388	0.160353	0.327714
ENSMUSG00000017639	3929.64	-0.200495	0.102665	-1.9529	0.0508309	0.137774
ENSMUSG00000017652	62.0161	-0.221248	0.24412	-0.906308	0.364773	0.576915
ENSMUSG00000017664	756.646	0.0656536	0.111265	0.590064	0.555148	0.742868
ENSMUSG00000017667	2117.93	0.296293	0.0916129	3.23418	0.00121992	0.00583089
ENSMUSG00000017670	2694.76	0.158106	0.126427	1.25057	0.21109	0.39927
ENSMUSG00000017677	10138.1	-0.590996	0.120561	-4.90206	9.48348e-07	8.30182e-06
ENSMUSG00000017679	1401.11	-0.152675	0.086279	-1.76955	0.0768021	0.189786
ENSMUSG00000017686	1687.39	-0.123944	0.0915061	-1.35449	0.175581	0.350161
ENSMUSG00000017688	1.42021	-1.57591	1.47829	-1.06603	0.286409	1
ENSMUSG00000017692	1193.87	1.07988	0.0757365	14.2583	3.97765e-46	5.12326e-44
ENSMUSG00000017697	73.5903	0.771482	0.217985	3.53915	0.000401417	0.00216856
ENSMUSG00000017707	2666.98	-0.275466	0.0641957	-4.29103	1.77848e-05	0.000127013
ENSMUSG00000017713	63.2279	-0.0783764	0.21364	-0.366862	0.713722	0.850823
ENSMUSG00000017715	859.328	-0.0924441	0.106958	-0.864305	0.38742	0.59856
ENSMUSG00000017716	658.521	1.6362	0.153653	10.6487	1.76801e-26	7.71099e-25
ENSMUSG00000017718	46.3529	0.621372	0.262229	2.36958	0.0178084	0.0584983
ENSMUSG00000017720	6.01996	0.144514	0.656622	0.220087	0.825803	0.914813
ENSMUSG00000017721	2022.12	-0.106403	0.146108	-0.728245	0.466464	0.670311
ENSMUSG00000017723	25.2728	0.0569359	0.553115	0.102937	0.918013	0.963191
ENSMUSG00000017724	118.645	-0.388277	0.194789	-1.99332	0.0462265	0.127762
ENSMUSG00000017733	0.448778	2.2739	3.24198	0.70139	0.48306	1
ENSMUSG00000017734	254.561	-1.24406	0.150018	-8.29273	1.10675e-16	2.51041e-15
ENSMUSG00000017737	298.861	-0.837405	0.140544	-5.95832	2.5485e-09	3.08241e-08
ENSMUSG00000017740	2696.78	-1.55279	0.115644	-13.4273	4.18128e-41	4.0749e-39
ENSMUSG00000017747	110.917	-0.540397	0.171291	-3.15484	0.00160585	0.00742888
ENSMUSG00000017754	552.921	-0.32	0.212672	-1.50467	0.13241	0.284603
ENSMUSG00000017756	1120.11	1.01395	0.137384	7.38043	1.57784e-13	2.81165e-12
ENSMUSG00000017760	1597.34	0.132168	0.115668	1.14265	0.253183	0.451564
ENSMUSG00000017764	347.864	0.0743919	0.179757	0.413847	0.678986	0.829362
ENSMUSG00000017765	253.998	0.623951	0.134121	4.65215	3.28494e-06	2.67076e-05
ENSMUSG00000017767	3.13022	-0.441735	0.947001	-0.466457	0.640889	1
ENSMUSG00000017774	463.739	0.362488	0.137954	2.6276	0.008599	0.0317507
ENSMUSG00000017776	3242.38	-0.129314	0.110029	-1.17527	0.239887	0.43524
ENSMUSG00000017778	185.895	0.039479	0.181572	0.217429	0.827874	0.916127
ENSMUSG00000017781	3803.85	-0.135786	0.0793221	-1.71183	0.0869278	0.208266
ENSMUSG00000017801	679.59	-0.00616285	0.0884692	-0.069661	0.944463	0.975054
ENSMUSG00000017802	1689.97	0.0171219	0.0876419	0.195362	0.845109	0.925416
ENSMUSG00000017817	17.8138	-0.581724	0.386958	-1.50332	0.132755	0.285123
ENSMUSG00000017830	57.4256	-0.462334	0.225866	-2.04694	0.0406643	0.115013
ENSMUSG00000017831	1616.49	-0.34791	0.138647	-2.50932	0.0120963	0.0423092
ENSMUSG00000017832	4.5885	0.502544	0.81857	0.613929	0.539262	0.730054
ENSMUSG00000017837	1251.12	0.0649483	0.108521	0.598485	0.549516	0.738399
ENSMUSG00000017843	2909.48	-0.0486456	0.0828377	-0.587239	0.557043	0.744537
ENSMUSG00000017858	862.014	-0.0122847	0.0891967	-0.137726	0.890457	0.949289
ENSMUSG00000017861	313.724	1.85028	0.205143	9.01947	1.89004e-19	5.22968e-18
ENSMUSG00000017868	2.23653	-0.0105298	1.10898	-0.00949498	0.992424	1
ENSMUSG00000017897	154.305	0.351427	0.197571	1.77874	0.0752828	0.186955
ENSMUSG00000017922	0.1123	0.745756	3.53381	0.211035	0.83286	1
ENSMUSG00000017929	932.086	-0.1819	0.106542	-1.7073	0.0877655	0.209634
ENSMUSG00000017943	2389.3	-0.397204	0.0828616	-4.79359	1.63826e-06	1.38673e-05
ENSMUSG00000017950	1.25548	0.730314	1.87413	0.389682	0.696772	1
ENSMUSG00000017969	83.4245	0.189839	0.295133	0.643234	0.520073	0.715286
ENSMUSG00000017978	288.17	-0.458505	0.139819	-3.27928	0.00104071	0.00505887
ENSMUSG00000017999	1189.16	0.335784	0.0946633	3.54714	0.000389434	0.00211055
ENSMUSG00000018001	1149.36	-0.10664	0.108	-0.98741	0.323442	0.533539
ENSMUSG00000018008	150.154	-0.0965867	0.217879	-0.443304	0.657546	0.815171
ENSMUSG00000018012	1254.36	-1.15987	0.18809	-6.16659	6.97799e-10	8.97724e-09
ENSMUSG00000018040	1043.93	-0.0112331	0.0992082	-0.113227	0.90985	0.959635
ENSMUSG00000018042	1965.61	0.119313	0.160536	0.743215	0.457351	0.662431
ENSMUSG00000018068	1744	0.342663	0.108272	3.16482	0.00155176	0.00720287
ENSMUSG00000018076	2895.65	0.359517	0.1015	3.54205	0.000397036	0.00214805
ENSMUSG00000018102	63.0244	1.09595	0.303584	3.61004	0.000306147	0.00170361
ENSMUSG00000018126	17.3964	0.618756	0.469622	1.31756	0.187651	0.366565
ENSMUSG00000018143	277.763	0.28658	0.124352	2.30459	0.0211895	0.067726
ENSMUSG00000018160	3223.62	0.301292	0.109439	2.75307	0.005904	0.0231371
ENSMUSG00000018166	34.1923	-1.50237	0.383192	-3.92067	8.8303e-05	0.000555678
ENSMUSG00000018167	875.105	0.438962	0.139882	3.13809	0.00170054	0.00780626
ENSMUSG00000018168	1.94913	-2.77257	1.41144	-1.96435	0.0494896	1
ENSMUSG00000018169	1005.83	1.42779	0.177139	8.06026	7.61338e-16	1.62801e-14
ENSMUSG00000018171	736.752	-0.188825	0.124072	-1.52189	0.128036	0.277841
ENSMUSG00000018189	512.283	0.0698387	0.13749	0.507956	0.611484	0.782898
ENSMUSG00000018196	1145.8	0.345873	0.100812	3.43087	0.000601639	0.00309677
ENSMUSG00000018199	2679.9	0.116267	0.104231	1.11548	0.264647	0.465318
ENSMUSG00000018209	1769.43	0.373741	0.085725	4.35977	1.302e-05	9.50496e-05
ENSMUSG00000018211	0.164161	-0.696916	3.53381	-0.197214	0.84366	1
ENSMUSG00000018217	269.452	-0.282926	0.217315	-1.30192	0.192945	0.374547
ENSMUSG00000018238	4.82156	0.779066	0.760621	1.02425	0.305717	0.513863
ENSMUSG00000018239	168.814	0.412851	0.173033	2.38597	0.0170339	0.0563938
ENSMUSG00000018259	3.84289	0.549171	1.03224	0.532019	0.594713	0.771455
ENSMUSG00000018263	2.37387	1.753	1.29953	1.34894	0.177355	1
ENSMUSG00000018286	2923.11	0.159924	0.132644	1.20566	0.227949	0.419848
ENSMUSG00000018287	1036.34	0.0255015	0.0945932	0.269591	0.787475	0.893521
ENSMUSG00000018293	3368.98	0.426727	0.18821	2.26729	0.0233726	0.0733936
ENSMUSG00000018322	627.967	0.383587	0.107974	3.5526	0.000381438	0.00207283
ENSMUSG00000018326	8466.51	-0.214082	0.0586842	-3.64804	0.000264253	0.00148968
ENSMUSG00000018334	717.231	0.556611	0.120814	4.60716	4.08198e-06	3.26574e-05
ENSMUSG00000018339	221.03	-0.656511	0.197242	-3.32845	0.000873301	0.00431943
ENSMUSG00000018340	1082.24	0.205434	0.144393	1.42275	0.15481	0.31917
ENSMUSG00000018341	6.19874	-0.614622	0.664289	-0.925232	0.354845	0.566625
ENSMUSG00000018347	386.792	0.193906	0.12087	1.60425	0.108659	0.246267
ENSMUSG00000018362	104.621	1.53561	0.262774	5.84383	5.10131e-09	5.99234e-08
ENSMUSG00000018363	2121.79	0.102868	0.0876811	1.17321	0.240713	0.436199
ENSMUSG00000018372	886.609	0.329959	0.133262	2.47602	0.0132856	0.0457428
ENSMUSG00000018377	3983.2	0.320845	0.110257	2.90997	0.00361462	0.0151181
ENSMUSG00000018378	2437.76	-0.0870245	0.095648	-0.909842	0.362906	0.574995
ENSMUSG00000018379	12792.3	0.207013	0.100165	2.06672	0.0387604	0.110626
ENSMUSG00000018381	7.21142	0.189686	0.657767	0.288379	0.773057	0.885279
ENSMUSG00000018387	77.0084	0.236567	0.20847	1.13477	0.25647	0.455706
ENSMUSG00000018395	4111.56	-0.282698	0.13674	-2.06741	0.0386953	0.110511
ENSMUSG00000018398	1509.14	0.584726	0.113366	5.15784	2.49813e-07	2.38808e-06
ENSMUSG00000018401	3352.05	-0.11021	0.0714746	-1.54194	0.123088	0.269888
ENSMUSG00000018405	150.338	-0.0853127	0.196717	-0.433683	0.664519	0.819624
ENSMUSG00000018411	27970.7	-0.846473	0.0753511	-11.2337	2.78496e-29	1.44667e-27
ENSMUSG00000018412	3952.96	0.138729	0.115714	1.1989	0.230568	0.423224
ENSMUSG00000018415	1325.55	0.36958	0.10075	3.66829	0.000244183	0.00139149
ENSMUSG00000018417	3072.49	0.161393	0.0820176	1.96778	0.049093	0.13402
ENSMUSG00000018425	1437.41	0.199061	0.11817	1.68453	0.0920794	0.217206
ENSMUSG00000018427	472.598	0.0610813	0.11481	0.53202	0.594712	0.771455
ENSMUSG00000018428	1413.29	-0.17383	0.100788	-1.72472	0.0845775	0.204167
ENSMUSG00000018433	1226.39	0.031267	0.0955413	0.327261	0.74347	0.867322
ENSMUSG00000018442	973.519	-0.165104	0.100573	-1.64162	0.100668	0.232461
ENSMUSG00000018446	1273	0.204925	0.080933	2.53204	0.0113402	0.0401297
ENSMUSG00000018449	368.55	0.254742	0.127647	1.99568	0.0459683	0.127176
ENSMUSG00000018451	5036.24	-0.363873	0.146266	-2.48775	0.0128555	0.0445051
ENSMUSG00000018459	78.5439	0.238585	0.29131	0.819009	0.412781	0.622408
ENSMUSG00000018470	196.235	0.0736244	0.146598	0.502221	0.615512	0.786212
ENSMUSG00000018474	23246.7	0.539111	0.100527	5.36287	8.19098e-08	8.34442e-07
ENSMUSG00000018476	4805.41	0.516555	0.182314	2.83333	0.00460652	0.0186128
ENSMUSG00000018479	5.17055	0.631599	0.691706	0.913104	0.361188	0.57318
ENSMUSG00000018481	3157.05	0.121779	0.0907802	1.34148	0.179766	0.355977
ENSMUSG00000018486	15.5561	-1.59936	0.635207	-2.51786	0.011807	0.0414817
ENSMUSG00000018500	25.3545	-0.790567	0.400225	-1.97531	0.0482335	0.13233
ENSMUSG00000018501	9280.52	0.381645	0.140389	2.71848	0.00655829	0.0253059
ENSMUSG00000018507	349.588	-1.04923	0.124559	-8.42361	3.65068e-17	8.52664e-16
ENSMUSG00000018509	944.703	0.845454	0.108587	7.78595	6.91932e-15	1.38418e-13
ENSMUSG00000018537	3775.06	0.230124	0.135951	1.69269	0.090514	0.214362
ENSMUSG00000018541	778.87	0.0885577	0.0855851	1.03473	0.300793	0.50844
ENSMUSG00000018543	15.3025	0.10721	0.479956	0.223374	0.823244	0.913633
ENSMUSG00000018547	4986.88	-0.141702	0.0823824	-1.72005	0.0854239	0.205557
ENSMUSG00000018548	4655.67	0.00544754	0.102717	0.0530342	0.957705	0.981774
ENSMUSG00000018554	392.482	-0.213149	0.126072	-1.6907	0.0908949	0.21501
ENSMUSG00000018559	1181.16	0.214131	0.131026	1.63426	0.102205	0.234853
ENSMUSG00000018565	1187.5	0.0616619	0.127314	0.484331	0.628151	0.794979
ENSMUSG00000018566	159.33	1.34829	0.199798	6.74827	1.49617e-11	2.25398e-10
ENSMUSG00000018567	4750.01	0.358258	0.115519	3.1013	0.00192673	0.00873351
ENSMUSG00000018569	3.38982	-1.71592	1.21195	-1.41583	0.156825	0.322277
ENSMUSG00000018570	443.032	0.71017	0.0999114	7.108	1.17738e-12	1.95859e-11
ENSMUSG00000018572	1645.55	0.395286	0.0874238	4.5215	6.14044e-06	4.76544e-05
ENSMUSG00000018574	505.304	0.00237136	0.113065	0.0209735	0.983267	0.99205
ENSMUSG00000018581	70.7865	-0.0428034	0.236112	-0.181284	0.856144	0.931595
ENSMUSG00000018583	4555.02	0.513581	0.0805948	6.37239	1.86107e-10	2.53808e-09
ENSMUSG00000018585	369.672	0.305072	0.248398	1.22816	0.219387	0.40918
ENSMUSG00000018589	975.391	-0.553764	0.171943	-3.22062	0.00127912	0.00607562
ENSMUSG00000018593	5609.76	-0.192544	0.150456	-1.27974	0.200636	0.385234
ENSMUSG00000018595	4.01904	-0.565148	0.816243	-0.692377	0.488701	0.689932
ENSMUSG00000018599	268.491	0.0677677	0.144845	0.467862	0.639883	0.802744
ENSMUSG00000018604	71.691	-0.256313	0.287858	-0.890412	0.373245	0.585223
ENSMUSG00000018620	0.164161	-0.696916	3.53381	-0.197214	0.84366	1
ENSMUSG00000018623	0.246692	0.0244222	3.53381	0.00691102	0.994486	1
ENSMUSG00000018634	128.757	-1.0247	0.176506	-5.80546	6.41878e-09	7.48009e-08
ENSMUSG00000018648	203	2.26785	0.18995	11.9392	7.39318e-33	4.78926e-31
ENSMUSG00000018651	959.355	0.350617	0.0955345	3.67005	0.000242503	0.00138335
ENSMUSG00000018654	145.337	-0.00949453	0.183941	-0.0516171	0.958834	0.98188
ENSMUSG00000018656	0.54956	-1.34309	2.30992	-0.581444	0.560941	1
ENSMUSG00000018659	189.288	-0.153651	0.218334	-0.703742	0.481593	0.683887
ENSMUSG00000018661	1346.83	0.374353	0.124802	2.99957	0.00270364	0.0117474
ENSMUSG00000018666	3917.52	0.419956	0.108086	3.88538	0.00010217	0.000634602
ENSMUSG00000018669	1195.1	0.164728	0.104456	1.577	0.114795	0.256726
ENSMUSG00000018672	86.6075	-0.122296	0.308234	-0.396762	0.691543	0.837301
ENSMUSG00000018677	1156.13	0.522146	0.170263	3.06671	0.00216431	0.00966917
ENSMUSG00000018678	590.135	0.583645	0.195842	2.98018	0.00288075	0.0124049
ENSMUSG00000018697	760.486	-0.114949	0.110989	-1.03568	0.300351	0.508043
ENSMUSG00000018698	1670.24	-3.35112	0.13527	-24.7736	1.72817e-135	1.81252e-132
ENSMUSG00000018707	22700.4	-0.0695085	0.0841218	-0.826284	0.408643	0.618587
ENSMUSG00000018727	129.826	0.0194211	0.266034	0.0730021	0.941804	0.973998
ENSMUSG00000018733	410.437	0.108923	0.115526	0.942845	0.34576	0.557861
ENSMUSG00000018736	1173.6	-0.057032	0.0863508	-0.660469	0.508953	0.706122
ENSMUSG00000018740	67.2068	0.384632	0.239191	1.60805	0.107824	0.244801
ENSMUSG00000018750	854.366	-0.134462	0.108644	-1.23765	0.215847	0.404806
ENSMUSG00000018752	9.06411	-0.0516312	0.58371	-0.0884536	0.929516	0.968154
ENSMUSG00000018761	916.258	0.101115	0.143721	0.703555	0.48171	0.683918
ENSMUSG00000018765	3126.33	0.187343	0.079175	2.36619	0.0179724	0.0589577
ENSMUSG00000018770	2352.81	-0.134896	0.15115	-0.892466	0.372143	0.584169
ENSMUSG00000018774	255.95	0.404877	0.16363	2.47434	0.0133481	0.0459004
ENSMUSG00000018776	15.8867	0.538725	0.432771	1.24483	0.213195	0.401645
ENSMUSG00000018796	433.836	-0.567805	0.10206	-5.56346	2.64479e-08	2.88374e-07
ENSMUSG00000018800	549.479	-0.553136	0.124307	-4.44977	8.59629e-06	6.48624e-05
ENSMUSG00000018809	268.308	0.178861	0.136202	1.3132	0.189114	0.368885
ENSMUSG00000018819	106.616	0.0900211	0.227925	0.394959	0.692873	0.837938
[truncated: 53,472 more rows]

## Sheet: Mus_Ctx15vCb15
ENSEMBL_ID	baseMean	log2FoldChange	lfcSE	stat	pvalue	padj
ENSMUSG00000000001	2521.59	0.455907	0.0823405	5.53684	3.07969e-08	2.94407e-07
ENSMUSG00000000003	0	NA	NA	NA	NA	1
ENSMUSG00000000028	219.197	1.52034	0.135059	11.2569	2.14277e-29	1.04358e-27
ENSMUSG00000000031	7441.02	-0.461696	0.376466	-1.22639	0.22005	0.398915
ENSMUSG00000000037	214.764	-0.192026	0.107574	-1.78507	0.0742504	0.17797
ENSMUSG00000000049	19.9562	-0.55001	0.484522	-1.13516	0.256308	0.443945
ENSMUSG00000000056	2023.32	0.0727737	0.0540491	1.34644	0.178162	0.3422
ENSMUSG00000000058	117.937	-0.0285235	0.191354	-0.149061	0.881505	0.940529
ENSMUSG00000000078	1497.95	-0.273452	0.0836511	-3.26896	0.00107945	0.00479941
ENSMUSG00000000085	1601.75	-0.335303	0.0973946	-3.44272	0.00057589	0.00273322
ENSMUSG00000000088	1135.98	-0.133247	0.100545	-1.32524	0.185091	0.351946
ENSMUSG00000000093	165.402	-0.233936	0.206874	-1.13081	0.258134	0.446327
ENSMUSG00000000094	9.82598	-0.788248	0.542512	-1.45296	0.146235	0.296798
ENSMUSG00000000103	0.223443	-1.33948	3.52722	-0.379755	0.704128	1
ENSMUSG00000000120	302.529	-0.704118	0.232737	-3.02539	0.00248316	0.0100746
ENSMUSG00000000125	221.312	-1.19705	0.135773	-8.81657	1.18016e-18	2.90895e-17
ENSMUSG00000000126	75.7948	-0.735862	0.205518	-3.58052	0.000342907	0.00170783
ENSMUSG00000000127	686.167	0.181723	0.0695291	2.61362	0.00895889	0.0308332
ENSMUSG00000000131	2679.14	-0.0634562	0.0526966	-1.20418	0.22852	0.409789
ENSMUSG00000000134	815.169	-0.152074	0.0799424	-1.90229	0.0571331	0.143858
ENSMUSG00000000142	1471.51	-0.755036	0.0925522	-8.15795	3.40746e-16	6.84461e-15
ENSMUSG00000000148	633.489	0.0130065	0.0918465	0.141612	0.887387	0.943669
ENSMUSG00000000149	1830.42	0.205505	0.0565663	3.633	0.00028015	0.00142249
ENSMUSG00000000154	6.72753	-1.24194	0.644205	-1.92787	0.0538711	0.137215
ENSMUSG00000000157	1.77251	-0.52243	1.16638	-0.447907	0.65422	1
ENSMUSG00000000159	2.48666	-1.24313	1.06598	-1.16618	0.24354	0.428314
ENSMUSG00000000167	52.759	0.114093	0.244736	0.466188	0.641081	0.789824
ENSMUSG00000000168	865.034	-0.158527	0.0745948	-2.12517	0.0335725	0.0935124
ENSMUSG00000000171	1125.75	-0.0825975	0.130932	-0.63084	0.528145	0.705539
ENSMUSG00000000182	4.90585	-1.94956	0.756325	-2.57767	0.0099469	0.0337231
ENSMUSG00000000183	0	NA	NA	NA	NA	1
ENSMUSG00000000184	6149.3	1.70356	0.0998329	17.0641	2.74691e-65	6.92593e-63
ENSMUSG00000000194	1561.02	-0.0719206	0.0657961	-1.09308	0.274357	0.465239
ENSMUSG00000000197	1162.44	-0.782211	0.0937305	-8.34532	7.10191e-17	1.51322e-15
ENSMUSG00000000202	223.567	0.0272276	0.14735	0.184782	0.8534	0.924272
ENSMUSG00000000204	1.09702	-0.259041	1.39382	-0.18585	0.852563	1
ENSMUSG00000000214	178.461	-2.07012	0.186793	-11.0824	1.52668e-28	6.99871e-27
ENSMUSG00000000215	1.35951	-0.548688	1.51771	-0.361524	0.717708	1
ENSMUSG00000000216	0.529325	1.48569	2.77861	0.534686	0.592867	1
ENSMUSG00000000223	2559.26	-0.3839	0.0717469	-5.35076	8.75851e-08	7.89567e-07
ENSMUSG00000000244	7.9553	-0.555767	0.693723	-0.801137	0.423052	0.6172
ENSMUSG00000000247	2704.01	0.646732	0.13528	4.78068	1.74702e-06	1.31284e-05
ENSMUSG00000000248	0	NA	NA	NA	NA	1
ENSMUSG00000000253	188.587	-0.557994	0.12875	-4.33394	1.46466e-05	9.46144e-05
ENSMUSG00000000263	18.8891	-3.22475	0.559814	-5.76039	8.39193e-09	8.5491e-08
ENSMUSG00000000266	517.243	-1.01912	0.0918601	-11.0943	1.33687e-28	6.15187e-27
ENSMUSG00000000275	182.144	0.00860383	0.164471	0.0523123	0.95828	0.97965
ENSMUSG00000000276	1079.03	-0.223998	0.10263	-2.18257	0.0290672	0.0828511
ENSMUSG00000000278	360.329	0.0511096	0.115677	0.441829	0.658613	0.803359
ENSMUSG00000000282	1389.67	-0.0282136	0.114911	-0.245526	0.806049	0.896463
ENSMUSG00000000290	18.8539	0.0169329	0.375409	0.0451052	0.964023	0.982244
ENSMUSG00000000295	249.377	-0.131035	0.119174	-1.09953	0.271538	0.461882
ENSMUSG00000000296	165.207	-1.1259	0.138531	-8.12744	4.38446e-16	8.73464e-15
ENSMUSG00000000301	26.265	-0.0241841	0.292565	-0.0826622	0.93412	0.968076
ENSMUSG00000000303	209.595	-1.26817	0.445285	-2.84799	0.00439967	0.0166866
ENSMUSG00000000305	3463.8	-0.0416302	0.0936549	-0.444507	0.656676	0.802053
ENSMUSG00000000308	624.438	-1.28928	0.119271	-10.8097	3.09747e-27	1.31074e-25
ENSMUSG00000000317	236.038	0.209348	0.167945	1.24653	0.212572	0.388852
ENSMUSG00000000318	17.5551	0.0199902	0.37718	0.0529991	0.957733	0.979571
ENSMUSG00000000320	17.9752	-0.665732	0.385804	-1.72557	0.0844251	0.196661
ENSMUSG00000000325	2919.74	-0.397467	0.0778059	-5.10844	3.24835e-07	2.71687e-06
ENSMUSG00000000326	661.615	-0.168383	0.0908347	-1.85373	0.063778	0.157268
ENSMUSG00000000339	863.653	-0.116341	0.101512	-1.14608	0.251764	0.438413
ENSMUSG00000000340	430.359	0.47734	0.099421	4.8012	1.57715e-06	1.19252e-05
ENSMUSG00000000346	1620.77	0.448252	0.0581274	7.71155	1.24301e-14	2.20256e-13
ENSMUSG00000000355	753.392	-0.00487912	0.11971	-0.0407579	0.967489	0.984077
ENSMUSG00000000359	13.6562	0.081525	0.46675	0.174665	0.861343	0.929049
ENSMUSG00000000365	19.8259	0.25938	0.387502	0.669364	0.503263	0.686265
ENSMUSG00000000374	2132.07	-0.104359	0.0645174	-1.61753	0.105764	0.233387
ENSMUSG00000000378	519.161	0.0210546	0.0984693	0.213819	0.830689	0.911734
ENSMUSG00000000381	0.332972	1.93758	3.09139	0.626768	0.530811	1
ENSMUSG00000000384	705.015	0.00175153	0.0855001	0.0204857	0.983656	0.99215
ENSMUSG00000000385	4.75734	-0.623359	0.759054	-0.821231	0.411515	0.60738
ENSMUSG00000000386	0.970628	-1.47326	1.60661	-0.916997	0.359144	1
ENSMUSG00000000392	23.9805	0.261777	0.324985	0.805505	0.420528	0.6149
ENSMUSG00000000394	13.326	2.71342	0.586429	4.62702	3.7096e-06	2.65497e-05
ENSMUSG00000000399	1065.58	0.0226928	0.0814153	0.278729	0.780452	0.881432
ENSMUSG00000000402	44.2684	-0.305199	0.293591	-1.03954	0.298555	0.491935
ENSMUSG00000000409	121.945	-0.570844	0.14935	-3.82218	0.000132276	0.000718687
ENSMUSG00000000411	3.45974	0.109154	0.806679	0.135313	0.892365	0.946773
ENSMUSG00000000416	2767.48	1.22968	0.0705686	17.4254	5.29469e-68	1.47308e-65
ENSMUSG00000000420	1237.17	0.0423142	0.0789832	0.535737	0.59214	0.754024
ENSMUSG00000000435	0.416572	-2.10978	2.91484	-0.723806	0.469185	1
ENSMUSG00000000439	688.009	0.210185	0.0805678	2.6088	0.009086	0.0311997
ENSMUSG00000000440	5.35274	-1.21474	0.932194	-1.3031	0.192541	0.361906
ENSMUSG00000000441	2171.51	0.186383	0.0645559	2.88717	0.00388729	0.0149661
ENSMUSG00000000486	183.05	0.502954	0.12069	4.16734	3.08175e-05	0.000186952
ENSMUSG00000000489	250.832	-0.250658	0.108089	-2.319	0.0203952	0.0616543
ENSMUSG00000000530	205.848	-0.23772	0.149562	-1.58944	0.11196	0.243617
ENSMUSG00000000531	108.894	0.11377	0.174202	0.653089	0.513699	0.694758
ENSMUSG00000000532	2827.18	-0.014442	0.0698319	-0.206811	0.836158	0.91481
ENSMUSG00000000538	2460.11	-0.369724	0.0607522	-6.08578	1.15928e-09	1.30635e-08
ENSMUSG00000000544	0.719863	-0.835988	1.83047	-0.456706	0.647882	1
ENSMUSG00000000552	1157.74	-0.602825	0.130901	-4.60518	4.12101e-06	2.93035e-05
ENSMUSG00000000555	307.46	-0.339604	0.136577	-2.48653	0.0128994	0.0421249
ENSMUSG00000000560	1117.14	-0.0242493	0.143597	-0.16887	0.865899	0.931969
ENSMUSG00000000561	1046.68	-0.0696005	0.0919821	-0.756674	0.449245	0.640739
ENSMUSG00000000562	2.91166	-0.73042	0.93884	-0.778003	0.436567	0.629762
ENSMUSG00000000563	3099.08	-0.0236373	0.0805941	-0.293288	0.769302	0.874798
ENSMUSG00000000567	1167.24	0.295474	0.148059	1.99565	0.0459718	0.120558
ENSMUSG00000000568	6459.49	0.219811	0.0628672	3.49643	0.000471525	0.00228076
ENSMUSG00000000579	22.3551	-0.14006	0.956206	-0.146475	0.883546	0.941465
ENSMUSG00000000581	992.313	-0.388735	0.133395	-2.91417	0.00356632	0.0138805
ENSMUSG00000000594	455.748	-0.375206	0.100626	-3.72873	0.000192448	0.00101133
ENSMUSG00000000600	1773.34	0.324304	0.0880643	3.68259	0.00023088	0.00119132
ENSMUSG00000000605	4028.67	-0.0700625	0.0780179	-0.898031	0.369169	0.567601
ENSMUSG00000000606	0	NA	NA	NA	NA	1
ENSMUSG00000000617	2.25457	0.712864	0.994012	0.717158	0.473276	0.661526
ENSMUSG00000000627	712.75	-0.586485	0.0889046	-6.59679	4.20162e-11	5.4531e-10
ENSMUSG00000000628	170.634	1.04942	0.130844	8.02038	1.05415e-15	2.05275e-14
ENSMUSG00000000631	4247.68	-0.0935456	0.0725056	-1.29018	0.196987	0.368024
ENSMUSG00000000632	7412.09	0.783138	0.106135	7.37873	1.59805e-13	2.59254e-12
ENSMUSG00000000673	5.91486	0.286375	0.710302	0.403174	0.68682	0.822383
ENSMUSG00000000682	4.61254	-0.0118118	0.700526	-0.0168613	0.986547	0.993649
ENSMUSG00000000686	8.94163	0.00163928	0.512159	0.00320072	0.997446	0.998767
ENSMUSG00000000690	0.906295	0.503291	1.60707	0.313173	0.754149	1
ENSMUSG00000000693	163.984	0.0021297	0.15065	0.0141367	0.988721	0.994588
ENSMUSG00000000701	0	NA	NA	NA	NA	1
ENSMUSG00000000706	3.35707	-0.534	0.861363	-0.619948	0.535292	0.711362
ENSMUSG00000000708	582.046	0.218133	0.0970977	2.24653	0.0246701	0.0725742
ENSMUSG00000000711	1952.21	0.0500425	0.0632326	0.791404	0.428708	0.622787
ENSMUSG00000000724	1.28497	0.2571	1.4032	0.183225	0.854622	1
ENSMUSG00000000730	4.85241	0.0700744	1.10065	0.0636665	0.949236	0.975264
ENSMUSG00000000731	11.0912	-0.0211011	0.479497	-0.0440068	0.964899	0.982764
ENSMUSG00000000732	20.7533	-0.262299	0.334786	-0.783483	0.433344	0.626775
ENSMUSG00000000738	1025.26	-0.118779	0.0685469	-1.73281	0.0831295	0.194335
ENSMUSG00000000739	10.7828	-0.302329	0.471508	-0.641196	0.521395	0.700043
ENSMUSG00000000740	368.734	0.194528	0.100681	1.93212	0.0533448	0.136161
ENSMUSG00000000743	1590.06	-0.0150171	0.0876708	-0.17129	0.863996	0.930734
ENSMUSG00000000751	1092.03	0.378323	0.0666717	5.67441	1.39164e-08	1.38052e-07
ENSMUSG00000000753	232.999	-0.424146	0.255959	-1.65708	0.0975024	0.219376
ENSMUSG00000000759	1463.71	0.180901	0.0703173	2.57263	0.0100928	0.0341624
ENSMUSG00000000766	34.3749	0.72195	0.358066	2.01625	0.0437738	0.11581
ENSMUSG00000000776	723.477	0.048418	0.102395	0.472852	0.636318	0.786423
ENSMUSG00000000782	185.716	0.0725984	0.156895	0.462721	0.643564	0.791578
ENSMUSG00000000787	8348.31	0.304395	0.109018	2.79215	0.00523588	0.0193843
ENSMUSG00000000791	4.68883	0.0778306	0.772129	0.1008	0.919709	0.960254
ENSMUSG00000000792	35.5151	-0.297671	0.288398	-1.03215	0.302001	0.495253
ENSMUSG00000000794	856.654	0.0980877	0.075721	1.29538	0.195188	0.365506
ENSMUSG00000000804	2527.8	-0.220155	0.0750972	-2.9316	0.00337225	0.0132251
ENSMUSG00000000805	43.6038	-0.717758	0.315326	-2.27624	0.0228316	0.0679669
ENSMUSG00000000811	279.3	-0.443161	0.100478	-4.41053	1.03119e-05	6.84018e-05
ENSMUSG00000000817	17.8822	-0.265157	0.441307	-0.600845	0.547943	0.720344
ENSMUSG00000000823	4989.88	-0.174924	0.0584315	-2.99366	0.00275656	0.0110523
ENSMUSG00000000826	6275.65	-0.384665	0.0683589	-5.62714	1.83219e-08	1.79693e-07
ENSMUSG00000000827	1042.36	0.29405	0.0741571	3.96524	7.33222e-05	0.000419467
ENSMUSG00000000838	1998.09	0.239229	0.0795485	3.00734	0.00263548	0.010632
ENSMUSG00000000861	4881.67	1.19408	0.081761	14.6046	2.62698e-48	3.55229e-46
ENSMUSG00000000869	256.558	-0.368548	0.1799	-2.04863	0.0404983	0.108761
ENSMUSG00000000876	241.097	-0.316879	0.117034	-2.70759	0.00677738	0.0242744
ENSMUSG00000000881	2766.95	-0.0374479	0.0589234	-0.635535	0.525079	0.703039
ENSMUSG00000000884	127.684	-0.0700095	0.149206	-0.469214	0.638917	0.788225
ENSMUSG00000000889	49.0469	-7.56301	1.17965	-6.41125	1.44327e-10	1.78054e-09
ENSMUSG00000000901	344.985	0.411043	0.128427	3.2006	0.00137142	0.00596285
ENSMUSG00000000902	2564.61	0.0802578	0.0698242	1.14943	0.250381	0.436601
ENSMUSG00000000903	3.32034	-0.763442	0.845878	-0.902544	0.366768	0.565201
ENSMUSG00000000915	1565.31	-0.167145	0.0835242	-2.00116	0.045375	0.119264
ENSMUSG00000000916	414.467	-0.109856	0.0992033	-1.10738	0.268129	0.457692
ENSMUSG00000000934	258.117	-0.634361	0.114728	-5.52925	3.21602e-08	3.06471e-07
ENSMUSG00000000938	1.743	-0.811151	1.4866	-0.545641	0.585312	1
ENSMUSG00000000942	2.99153	-2.27424	1.19332	-1.90581	0.0566749	0.143025
ENSMUSG00000000948	444.93	0.190804	0.143428	1.33031	0.183416	0.349573
ENSMUSG00000000957	1434.99	0.119759	0.0998603	1.19926	0.230426	0.412046
ENSMUSG00000000958	98.3692	-0.0666748	0.177223	-0.37622	0.706753	0.835198
ENSMUSG00000000959	1331.63	0.000286279	0.070005	0.00408942	0.996737	0.998467
ENSMUSG00000000976	1389.63	0.141501	0.0669104	2.11478	0.0344485	0.095469
ENSMUSG00000000982	16.177	0.621615	0.381317	1.63018	0.103064	0.229184
ENSMUSG00000000983	0	NA	NA	NA	NA	1
ENSMUSG00000001014	0	NA	NA	NA	NA	1
ENSMUSG00000001016	4002.81	0.299699	0.0832915	3.59819	0.00032044	0.00160652
ENSMUSG00000001017	3687.59	0.232092	0.0679946	3.41339	0.000641603	0.00301261
ENSMUSG00000001018	612.708	-0.0414249	0.0743605	-0.557082	0.577472	0.743574
ENSMUSG00000001020	1.27134	0.32662	1.48731	0.219604	0.82618	1
ENSMUSG00000001021	0.566824	-1.56357	2.06376	-0.757633	0.448671	1
ENSMUSG00000001023	0	NA	NA	NA	NA	1
ENSMUSG00000001025	59.6943	-0.0144082	0.307955	-0.0467869	0.962683	0.981705
ENSMUSG00000001027	2.44237	-0.214422	0.945967	-0.22667	0.82068	0.905487
ENSMUSG00000001029	75.5292	-0.110646	0.222283	-0.497768	0.618647	0.774
ENSMUSG00000001034	1807.13	0.471282	0.0869704	5.41888	5.99743e-08	5.5302e-07
ENSMUSG00000001036	2118.13	-0.121169	0.0573528	-2.1127	0.0346266	0.0958308
ENSMUSG00000001039	301.604	0.183521	0.120523	1.5227	0.127834	0.268953
ENSMUSG00000001052	2351.67	-0.125829	0.0554616	-2.26876	0.0232829	0.0691403
ENSMUSG00000001053	216.3	-0.719398	0.125822	-5.71756	1.08062e-08	1.08353e-07
ENSMUSG00000001054	713.048	-0.141606	0.0835962	-1.69392	0.0902797	0.206953
ENSMUSG00000001056	424.619	0.201478	0.0903911	2.22896	0.0258165	0.0754044
ENSMUSG00000001062	1465.92	-0.350285	0.0974308	-3.59522	0.000324118	0.00162361
ENSMUSG00000001065	682.234	0.100508	0.0779271	1.28977	0.19713	0.368203
ENSMUSG00000001076	214.311	-5.33364	0.50596	-10.5416	5.55339e-26	2.18925e-24
ENSMUSG00000001082	661.555	0.0191271	0.11398	0.167811	0.866732	0.932411
ENSMUSG00000001089	1114.81	0.363793	0.0678662	5.36044	8.30197e-08	7.51212e-07
ENSMUSG00000001095	0.618885	1.78805	2.29504	0.779093	0.435925	1
ENSMUSG00000001098	901.522	0.183912	0.0788888	2.33128	0.0197384	0.0600361
ENSMUSG00000001100	1799.16	0.0628504	0.0817993	0.768349	0.44228	0.634657
ENSMUSG00000001103	2.09632	1.01326	1.09165	0.92819	0.353309	1
ENSMUSG00000001105	725.384	-0.163659	0.0873268	-1.8741	0.0609163	0.151524
ENSMUSG00000001119	773.737	-0.67296	0.349607	-1.9249	0.0542416	0.137897
ENSMUSG00000001120	789.841	-0.348094	0.0988339	-3.52201	0.000428291	0.00209092
ENSMUSG00000001123	95.2705	-0.145063	0.229577	-0.631869	0.527472	0.705073
ENSMUSG00000001127	3191.18	-0.267397	0.0705285	-3.79134	0.000149837	0.000803634
ENSMUSG00000001128	488.995	-0.196855	0.113683	-1.73161	0.0833431	0.194741
ENSMUSG00000001131	32.9991	0.207405	0.315409	0.657577	0.51081	0.692393
ENSMUSG00000001134	102.983	0.344973	0.177897	1.93918	0.0524793	0.134362
ENSMUSG00000001138	869.385	0.0714201	0.103269	0.691595	0.489192	0.674233
ENSMUSG00000001143	1129.31	-0.046261	0.0633981	-0.72969	0.46558	0.654766
ENSMUSG00000001150	2065.08	0.117689	0.0543168	2.16671	0.030257	0.0857578
ENSMUSG00000001151	1029.33	0.584492	0.0659425	8.86367	7.74247e-19	1.94809e-17
ENSMUSG00000001155	3.99329	-1.20019	0.855748	-1.40251	0.160764	0.317838
ENSMUSG00000001156	787.238	-0.173695	0.0799264	-2.17318	0.0297666	0.0845262
ENSMUSG00000001157	1013.56	0.326102	0.102682	3.17584	0.00149401	0.00643576
ENSMUSG00000001158	646.101	0.193332	0.0719854	2.68572	0.00723743	0.0257016
ENSMUSG00000001166	9.72535	-0.491696	0.496386	-0.990551	0.321905	0.517859
ENSMUSG00000001168	0.360258	-0.610483	3.08452	-0.197918	0.843109	1
ENSMUSG00000001173	1884.22	-0.307362	0.0563826	-5.45136	4.99873e-08	4.63578e-07
ENSMUSG00000001175	14880.9	-0.440203	0.0590019	-7.46083	8.59782e-14	1.42835e-12
ENSMUSG00000001211	2402.37	-0.00669782	0.0619827	-0.10806	0.913948	0.957751
ENSMUSG00000001225	1.41842	3.11139	1.50952	2.06117	0.0392866	1
ENSMUSG00000001227	1275.31	-0.453712	0.101741	-4.45948	8.2158e-06	5.54246e-05
ENSMUSG00000001228	922.842	1.388	0.116991	11.8641	1.81814e-32	1.08394e-30
ENSMUSG00000001229	1472.63	-0.099046	0.0777276	-1.27427	0.202568	0.375951
ENSMUSG00000001240	412.63	-0.33848	0.145239	-2.3305	0.0197798	0.0601395
ENSMUSG00000001247	140.936	-0.0609346	0.244391	-0.249332	0.803104	0.894844
ENSMUSG00000001248	7410.14	0.0519877	0.0781202	0.665483	0.505741	0.688187
ENSMUSG00000001249	10.6905	-0.471922	0.507864	-0.929228	0.352771	0.551222
ENSMUSG00000001260	257.707	-1.22702	0.139135	-8.8189	1.15591e-18	2.85207e-17
ENSMUSG00000001270	4926.15	-0.0810387	0.0995089	-0.814387	0.415423	0.610412
ENSMUSG00000001280	1895.4	0.523963	0.0670543	7.814	5.53995e-15	1.02128e-13
ENSMUSG00000001281	5.34481	-0.289299	0.663261	-0.436177	0.662709	0.805871
ENSMUSG00000001285	658.503	0.135358	0.0945088	1.43223	0.152078	0.305507
ENSMUSG00000001288	224.011	0.4224	0.163143	2.58915	0.00962136	0.0327548
ENSMUSG00000001289	1966.5	0.145607	0.100709	1.44581	0.14823	0.299641
ENSMUSG00000001300	3256.65	2.03551	0.0709944	28.6714	8.67119e-181	2.33207e-177
ENSMUSG00000001305	335.005	0.210082	0.0943172	2.22739	0.025921	0.0755925
ENSMUSG00000001313	1565.47	0.540467	0.0833845	6.48162	9.07423e-11	1.14456e-09
ENSMUSG00000001323	950.937	0.111069	0.0793789	1.39923	0.161745	0.319282
ENSMUSG00000001333	15.0568	-1.07879	0.406482	-2.65398	0.00795491	0.0279421
ENSMUSG00000001334	188.474	-1.67024	0.161911	-10.3158	5.97835e-25	2.21263e-23
ENSMUSG00000001348	15.1249	-0.589681	0.461315	-1.27826	0.201158	0.373929
ENSMUSG00000001349	6.32585	-0.29164	0.603376	-0.483348	0.628849	0.780899
ENSMUSG00000001366	755.531	-0.353364	0.0768015	-4.601	4.20463e-06	2.98455e-05
ENSMUSG00000001376	1125.23	0.0393848	0.0827073	0.476195	0.633935	0.78484
ENSMUSG00000001380	1582.65	-0.0575864	0.0643838	-0.894423	0.371096	0.569234
ENSMUSG00000001383	1968	0.408754	0.0653565	6.25421	3.99523e-10	4.7173e-09
ENSMUSG00000001403	547.547	1.51014	0.105341	14.3358	1.30748e-46	1.63977e-44
ENSMUSG00000001415	2908.38	-0.036463	0.0653067	-0.558335	0.576616	0.742867
ENSMUSG00000001416	3779.94	0.27527	0.0484562	5.68079	1.34077e-08	1.33169e-07
ENSMUSG00000001418	502.632	-0.162387	0.0929959	-1.74618	0.0807799	0.190131
ENSMUSG00000001419	2058.62	0.139745	0.101522	1.37649	0.168669	0.328979
ENSMUSG00000001420	14.0397	-0.251279	0.471268	-0.533198	0.593897	0.755176
ENSMUSG00000001424	1781.93	-0.0684968	0.0657289	-1.04211	0.297361	0.490694
ENSMUSG00000001435	1182.13	-0.279733	0.168277	-1.66234	0.0964453	0.217584
ENSMUSG00000001436	439.845	-0.204123	0.115197	-1.77194	0.076404	0.181898
ENSMUSG00000001440	6580.38	0.289343	0.0543019	5.32841	9.9076e-08	8.88527e-07
ENSMUSG00000001441	4759.66	-0.0901404	0.0607822	-1.48301	0.138073	0.284431
ENSMUSG00000001444	3.71662	-0.0205383	0.781805	-0.0262704	0.979042	0.989714
ENSMUSG00000001445	674.236	-0.0851916	0.122391	-0.696059	0.486392	0.672135
ENSMUSG00000001467	2976.92	-0.208892	0.0639902	-3.26444	0.00109682	0.00486682
ENSMUSG00000001472	8283.83	-0.379957	0.0534812	-7.10451	1.20754e-12	1.80645e-11
ENSMUSG00000001473	274.148	0.0161056	0.15871	0.101478	0.919171	0.960064
ENSMUSG00000001482	1111.76	-0.0651426	0.0629949	-1.03409	0.301093	0.494429
ENSMUSG00000001493	17.1339	-0.0850166	0.426665	-0.199259	0.84206	0.917835
ENSMUSG00000001494	2.70676	-0.50692	1.02612	-0.494014	0.621296	0.775498
ENSMUSG00000001496	470.184	2.1162	1.43692	1.47273	0.140824	0.288648
ENSMUSG00000001497	0.700385	0.0977201	1.82845	0.0534443	0.957378	1
ENSMUSG00000001504	1037.5	-4.10764	0.372719	-11.0207	3.03575e-28	1.37346e-26
ENSMUSG00000001506	2211.29	-0.775121	0.381094	-2.03394	0.0419577	0.111812
ENSMUSG00000001507	881.041	-1.18184	0.104866	-11.27	1.84608e-29	9.04543e-28
ENSMUSG00000001508	1.12824	-0.158184	2.03837	-0.0776029	0.938144	1
ENSMUSG00000001510	2.68356	-2.55623	1.17964	-2.16695	0.0302388	0.0857262
ENSMUSG00000001517	832.972	1.5494	0.102731	15.0822	2.12065e-51	3.22833e-49
ENSMUSG00000001518	568.427	-0.248563	0.0887872	-2.79953	0.00511766	0.0190106
ENSMUSG00000001520	250.269	-0.325469	0.152909	-2.12851	0.0332949	0.0928566
ENSMUSG00000001521	730.259	0.0336999	0.125124	0.269332	0.787674	0.885211
ENSMUSG00000001524	166.786	0.442265	0.129791	3.4075	0.000655601	0.00307297
ENSMUSG00000001525	58486.3	0.0831835	0.0749478	1.10989	0.267048	0.456394
ENSMUSG00000001542	64.7488	-0.412267	0.217222	-1.89791	0.0577082	0.145035
ENSMUSG00000001552	1563.37	-0.526503	0.0889695	-5.91779	3.263e-09	3.47474e-08
ENSMUSG00000001555	374.203	-0.182613	0.196101	-0.931217	0.351741	0.550242
ENSMUSG00000001558	15.9797	0.0880803	0.416754	0.211349	0.832615	0.912864
ENSMUSG00000001566	0.225489	-1.34848	3.52657	-0.382377	0.702182	1
ENSMUSG00000001569	646.09	0.421985	0.0825743	5.11037	3.21532e-07	2.69111e-06
ENSMUSG00000001576	3105.42	-0.00944729	0.0662828	-0.14253	0.886661	0.943203
ENSMUSG00000001583	7.07814	-0.35023	0.579621	-0.604239	0.545685	0.718428
ENSMUSG00000001588	28.7138	0.0187766	0.31221	0.0601409	0.952043	0.97645
ENSMUSG00000001604	14.084	-1.00678	0.544036	-1.85058	0.06423	0.158208
ENSMUSG00000001622	0	NA	NA	NA	NA	1
ENSMUSG00000001627	782.907	-0.0419483	0.0888969	-0.471876	0.637015	0.786928
ENSMUSG00000001630	261.895	-0.101884	0.112803	-0.903199	0.366421	0.564846
ENSMUSG00000001632	1275.11	0.237771	0.0684495	3.47367	0.000513384	0.00246508
ENSMUSG00000001642	169.979	-0.165465	0.232434	-0.711878	0.47654	0.664324
ENSMUSG00000001655	0.225489	-1.34848	3.52657	-0.382377	0.702182	1
ENSMUSG00000001656	0	NA	NA	NA	NA	1
ENSMUSG00000001657	4.24089	1.6343	1.17146	1.3951	0.162985	0.321032
ENSMUSG00000001661	3.30681	1.55473	1.24487	1.24891	0.211696	0.387809
ENSMUSG00000001663	76.1878	-0.193575	0.206787	-0.936108	0.349218	0.547604
ENSMUSG00000001665	8.12959	-0.666865	0.614086	-1.08595	0.277502	0.468621
ENSMUSG00000001666	272.474	-0.233264	0.120011	-1.94369	0.0519327	0.13316
ENSMUSG00000001670	0.79885	0.13796	1.79797	0.0767313	0.938837	1
ENSMUSG00000001672	27.4153	-0.171988	0.302163	-0.569189	0.569228	0.737076
ENSMUSG00000001674	409.852	0.526013	0.0887936	5.92399	3.1422e-09	3.35052e-08
ENSMUSG00000001687	919.866	0.0662689	0.0922769	0.718153	0.472663	0.660975
ENSMUSG00000001700	151.708	-0.654471	0.160181	-4.08581	4.39233e-05	0.000260643
ENSMUSG00000001707	765.195	-0.191882	0.101593	-1.88873	0.0589283	0.147488
ENSMUSG00000001729	6270.74	0.100847	0.0679486	1.48416	0.137766	0.283944
ENSMUSG00000001739	19.9255	-0.0281299	0.351817	-0.0799558	0.936272	0.969157
ENSMUSG00000001741	22.8547	0.557302	0.389455	1.43098	0.152436	0.3061
ENSMUSG00000001750	264.507	-0.270145	0.12632	-2.13858	0.0324695	0.0909739
ENSMUSG00000001751	188.351	-0.598517	0.184845	-3.23795	0.00120393	0.00530415
ENSMUSG00000001755	601.137	0.167073	0.0825799	2.02317	0.0430554	0.114184
ENSMUSG00000001761	891.901	0.365173	0.12485	2.9249	0.00344567	0.0134629
ENSMUSG00000001763	171.215	-0.767029	0.143829	-5.33293	9.66386e-08	8.67706e-07
ENSMUSG00000001767	787.461	0.448389	0.117797	3.80647	0.000140966	0.000760435
ENSMUSG00000001768	512.286	-0.415746	0.0825947	-5.03356	4.81455e-07	3.90144e-06
ENSMUSG00000001773	8.86276	0.217213	0.566408	0.383492	0.701355	0.831961
ENSMUSG00000001774	1767.99	0.0268075	0.079135	0.338757	0.734793	0.852825
ENSMUSG00000001783	2305.39	0.126743	0.0577154	2.19599	0.0280925	0.0806618
ENSMUSG00000001785	918.134	0.285034	0.0687859	4.14379	3.41618e-05	0.000205847
ENSMUSG00000001786	1625.93	-0.585866	0.0908638	-6.44774	1.1353e-10	1.41796e-09
ENSMUSG00000001794	2514.66	-0.325638	0.094815	-3.43445	0.000593752	0.00280973
ENSMUSG00000001802	3163.28	-0.162896	0.0765237	-2.1287	0.033279	0.0928548
ENSMUSG00000001804	0.112744	-0.638981	3.53381	-0.180819	0.856509	1
ENSMUSG00000001815	90.6968	-6.08042	0.87225	-6.97095	3.14799e-12	4.54636e-11
ENSMUSG00000001819	3.22576	-3.58642	1.26489	-2.83536	0.00457738	0.0172632
ENSMUSG00000001823	0	NA	NA	NA	NA	1
ENSMUSG00000001827	169.258	-0.0459085	0.491559	-0.0933938	0.925591	0.963154
ENSMUSG00000001829	906.016	-0.298723	0.0802371	-3.72301	0.000196864	0.00103185
ENSMUSG00000001833	3877.55	0.22269	0.0727677	3.06029	0.00221123	0.00907936
ENSMUSG00000001844	521.915	-0.0582552	0.0929918	-0.626455	0.531016	0.708036
ENSMUSG00000001847	4749.29	0.0429303	0.0650901	0.659552	0.509541	0.691337
ENSMUSG00000001855	1370.12	0.0965609	0.0786048	1.22843	0.219284	0.397973
ENSMUSG00000001864	823.09	0.57415	0.0757756	7.57698	3.53705e-14	6.06763e-13
ENSMUSG00000001865	5.19065	-0.536514	0.890755	-0.602314	0.546965	0.719513
ENSMUSG00000001870	294.878	1.56828	0.116009	13.5186	1.21479e-41	1.20016e-39
ENSMUSG00000001891	992.306	-0.225766	0.0889687	-2.53759	0.0111618	0.0373027
ENSMUSG00000001901	104.173	-1.51495	0.223025	-6.79276	1.1001e-11	1.50101e-10
ENSMUSG00000001909	1111.56	-0.167796	0.063436	-2.64513	0.00816599	0.0285715
ENSMUSG00000001910	2264.46	0.122143	0.0774415	1.57723	0.114742	0.248243
ENSMUSG00000001911	5971.01	2.16845	0.110772	19.5758	2.48616e-85	1.15726e-82
ENSMUSG00000001918	260.153	-0.411276	0.142713	-2.88184	0.00395361	0.0151852
ENSMUSG00000001924	15057.9	-0.0541923	0.0609587	-0.888999	0.374003	0.572063
ENSMUSG00000001930	277.365	-0.477087	0.19218	-2.4825	0.0130463	0.04253
ENSMUSG00000001942	248.393	-0.216308	0.103468	-2.09057	0.0365665	0.10009
ENSMUSG00000001943	57.046	-0.0974443	0.23132	-0.421254	0.67357	0.813318
ENSMUSG00000001946	360.582	-0.143305	0.127029	-1.12813	0.259266	0.447577
ENSMUSG00000001948	100.11	0.0609182	0.159413	0.382141	0.702357	0.83283
ENSMUSG00000001962	659.292	0.196745	0.0832358	2.3637	0.0180934	0.0558538
ENSMUSG00000001964	974.955	0.39061	0.117227	3.33208	0.000861991	0.00392633
ENSMUSG00000001983	175.37	-0.0427565	0.131875	-0.324221	0.745771	0.859058
ENSMUSG00000001985	4508.54	0.772321	0.101537	7.60631	2.82024e-14	4.87599e-13
ENSMUSG00000001986	1066.67	-0.259102	0.0850556	-3.04627	0.00231701	0.00946872
ENSMUSG00000001988	183.558	0.222701	0.168694	1.32015	0.186785	0.354138
ENSMUSG00000001995	2468.44	0.259035	0.0606415	4.27159	1.94088e-05	0.000122725
ENSMUSG00000001998	590.907	0.0769308	0.0908408	0.846875	0.397065	0.593868
ENSMUSG00000001999	185.002	0.139323	0.119741	1.16354	0.244611	0.429522
ENSMUSG00000002006	3998.79	-0.278938	0.0734897	-3.79561	0.000147281	0.000791154
ENSMUSG00000002007	13.1277	-1.22593	0.485877	-2.52314	0.0116313	0.0386405
ENSMUSG00000002010	1721.02	0.00665102	0.0644371	0.103217	0.917791	0.959424
ENSMUSG00000002012	1511.67	-0.667116	0.101931	-6.5448	5.95739e-11	7.6336e-10
ENSMUSG00000002014	615.016	0.0159626	0.0832074	0.191841	0.847867	0.920987
ENSMUSG00000002015	594.853	-0.210529	0.0836072	-2.51807	0.0118	0.0391045
ENSMUSG00000002017	1199.33	0.333664	0.0648547	5.14479	2.67818e-07	2.26933e-06
ENSMUSG00000002020	13.4543	1.0563	0.530336	1.99175	0.0463983	0.121492
ENSMUSG00000002028	8779	0.31473	0.0667463	4.71532	2.41329e-06	1.77441e-05
ENSMUSG00000002031	1662.47	0.152752	0.0717518	2.1289	0.0332624	0.0928196
ENSMUSG00000002032	260.454	-0.993029	0.139683	-7.10919	1.16728e-12	1.74947e-11
ENSMUSG00000002033	0.265784	0.0823582	3.36176	0.0244985	0.980455	1
ENSMUSG00000002043	116.171	0.0417283	0.170138	0.245261	0.806254	0.896641
ENSMUSG00000002052	4049.66	0.124352	0.0840663	1.47921	0.139083	0.286001
ENSMUSG00000002055	604.914	1.76485	0.104398	16.905	4.13636e-64	9.91293e-62
ENSMUSG00000002057	0	NA	NA	NA	NA	1
ENSMUSG00000002058	972.045	-0.225926	0.0926568	-2.43831	0.014756	0.0471761
ENSMUSG00000002059	578.593	0.0688194	0.0932917	0.73768	0.460709	0.650724
ENSMUSG00000002064	566.927	-0.0598583	0.103795	-0.576698	0.564143	0.733041
ENSMUSG00000002068	157.468	0.104398	0.133649	0.781136	0.434722	0.628034
ENSMUSG00000002076	8.86483	-0.188951	0.544167	-0.34723	0.728418	0.849132
ENSMUSG00000002083	344.481	-0.484583	0.165399	-2.92978	0.00339205	0.0132855
ENSMUSG00000002100	4.01849	0.445318	1.0551	0.422061	0.672981	0.813052
ENSMUSG00000002102	2163.51	0.0692527	0.0571627	1.2115	0.225703	0.406121
ENSMUSG00000002103	1618.86	-0.0442105	0.057898	-0.763593	0.44511	0.637093
ENSMUSG00000002104	6.52179	0.0739157	0.621382	0.118954	0.905312	0.953447
ENSMUSG00000002105	520.383	-0.316148	0.105398	-2.99956	0.00270369	0.0108691
ENSMUSG00000002107	12108.8	1.18579	0.0735915	16.1131	2.06414e-58	4.12914e-56
ENSMUSG00000002108	37.7014	-0.0780504	0.263715	-0.295965	0.767257	0.873375
ENSMUSG00000002109	196.394	-0.178898	0.121561	-1.47167	0.141111	0.289137
ENSMUSG00000002111	36.198	0.0690105	0.282209	0.244537	0.806815	0.896823
ENSMUSG00000002129	3070	0.171615	0.0729689	2.35189	0.0186782	0.0573737
ENSMUSG00000002147	168.559	-0.200008	0.180562	-1.1077	0.267992	0.457619
ENSMUSG00000002190	256.357	-1.3348	0.151295	-8.82251	1.11918e-18	2.77275e-17
ENSMUSG00000002204	30.9199	-0.227136	0.27977	-0.811869	0.416867	0.611716
ENSMUSG00000002205	435.09	0.262918	0.0937879	2.80333	0.00505787	0.0188207
ENSMUSG00000002210	620.673	-0.149619	0.0897046	-1.6679	0.0953349	0.215682
ENSMUSG00000002221	1149.2	0.153363	0.0784234	1.95558	0.0505151	0.130287
ENSMUSG00000002222	1597.53	0.170423	0.0866033	1.96786	0.0490844	0.127231
ENSMUSG00000002227	255.59	-0.101555	0.11292	-0.899348	0.368467	0.566737
ENSMUSG00000002228	24.675	1.85396	0.360401	5.14416	2.68718e-07	2.27424e-06
ENSMUSG00000002233	399.028	-0.0226362	0.144664	-0.156475	0.875659	0.937514
ENSMUSG00000002240	0	NA	NA	NA	NA	1
ENSMUSG00000002249	353.037	0.239704	0.141361	1.69569	0.0899446	0.206322
ENSMUSG00000002250	397.496	-0.000128718	0.120732	-0.00106615	0.999149	0.999583
ENSMUSG00000002257	61.0556	-0.252967	0.202992	-1.24619	0.212694	0.389017
ENSMUSG00000002265	9042.76	-0.406408	0.0498009	-8.16066	3.3321e-16	6.71552e-15
ENSMUSG00000002266	1005.69	-0.393465	0.0924078	-4.25791	2.06344e-05	0.000129762
ENSMUSG00000002274	508.805	-0.27042	0.166565	-1.62351	0.104481	0.231377
ENSMUSG00000002279	283.314	-0.210105	0.102147	-2.0569	0.0396956	0.106882
ENSMUSG00000002280	377.795	0.126781	0.0929266	1.36431	0.172471	0.334579
ENSMUSG00000002289	181.388	-0.202486	0.178429	-1.13483	0.256446	0.444139
ENSMUSG00000002297	528.993	0.970919	0.0981656	9.89062	4.57174e-23	1.5348e-21
ENSMUSG00000002307	831.011	0.0530832	0.0841046	0.631157	0.527938	0.705457
ENSMUSG00000002308	259.904	0.0392853	0.115632	0.339744	0.734049	0.852248
ENSMUSG00000002319	892.765	-0.357522	0.0729371	-4.90179	9.49667e-07	7.38172e-06
ENSMUSG00000002320	588.54	0.0959845	0.0863862	1.11111	0.266521	0.455686
ENSMUSG00000002324	9.68762	0.28924	0.556718	0.519544	0.603381	0.761564
ENSMUSG00000002325	563.669	-0.126106	0.0826422	-1.52593	0.127028	0.2676
ENSMUSG00000002326	169.633	0.429723	0.120737	3.55915	0.000372051	0.00183898
ENSMUSG00000002329	622.853	-0.133392	0.0776383	-1.71812	0.0857744	0.198905
ENSMUSG00000002332	699.285	0.108298	0.085024	1.27374	0.202756	0.376215
ENSMUSG00000002341	8022.86	-0.283287	0.120638	-2.34823	0.0188627	0.057845
ENSMUSG00000002342	590.205	0.144727	0.0875114	1.65381	0.0981665	0.220481
ENSMUSG00000002343	896.348	-0.0952218	0.100465	-0.947811	0.343226	0.540554
ENSMUSG00000002345	371.819	0.0274726	0.0873759	0.314418	0.753203	0.863837
ENSMUSG00000002346	589.598	-0.329392	0.0833209	-3.95329	7.70848e-05	0.000438505
ENSMUSG00000002365	240.336	0.0292526	0.116605	0.250868	0.801916	0.894112
ENSMUSG00000002372	2116.44	-0.00412629	0.0729458	-0.0565665	0.954891	0.978002
ENSMUSG00000002379	741.557	-0.201373	0.115547	-1.74279	0.0813709	0.191184
ENSMUSG00000002384	15.553	-0.737942	0.388246	-1.90071	0.0573404	0.14429
ENSMUSG00000002393	237.849	-0.459172	0.136273	-3.3695	0.000753055	0.0034799
ENSMUSG00000002395	722.993	-0.133606	0.0877944	-1.5218	0.128059	0.269302
ENSMUSG00000002396	313.944	-0.0226764	0.0971132	-0.233505	0.815369	0.901641
ENSMUSG00000002409	917.203	0.173057	0.114015	1.51784	0.129054	0.270554
ENSMUSG00000002413	2455.29	0.0230831	0.0671231	0.343891	0.730928	0.850879
ENSMUSG00000002416	748.099	-0.360866	0.0923889	-3.90594	9.38589e-05	0.000526624
ENSMUSG00000002428	752.052	0.428092	0.0782383	5.47164	4.45883e-08	4.16382e-07
ENSMUSG00000002455	1642.37	0.222492	0.061977	3.58992	0.000330782	0.00165255
ENSMUSG00000002458	450.962	-0.0920477	0.105205	-0.874934	0.38161	0.579041
ENSMUSG00000002459	213.381	0.214684	0.111455	1.92619	0.0540802	0.137627
ENSMUSG00000002475	46.1995	-0.673984	0.232935	-2.89344	0.0038105	0.0147056
ENSMUSG00000002477	1483.95	0.446246	0.0991306	4.5016	6.74431e-06	4.61277e-05
ENSMUSG00000002486	650.138	-0.168674	0.090159	-1.87085	0.0613658	0.152423
ENSMUSG00000002489	1635.85	0.0328339	0.0748093	0.438901	0.660733	0.804641
ENSMUSG00000002496	3258.87	-0.107274	0.0593857	-1.80639	0.0708571	0.17139
ENSMUSG00000002500	3.37242	-0.18447	0.819613	-0.22507	0.821925	0.906034
ENSMUSG00000002504	500.241	-0.768816	0.0912556	-8.42487	3.61165e-17	7.93269e-16
ENSMUSG00000002524	2979.56	-0.0790009	0.0822671	-0.960297	0.336906	0.533677
ENSMUSG00000002546	2137.46	-0.153752	0.0661053	-2.32586	0.0200258	0.0607425
ENSMUSG00000002550	572.228	-0.126179	0.0802573	-1.57219	0.115908	0.250104
ENSMUSG00000002565	0.422367	0.827666	2.54696	0.324963	0.745209	1
ENSMUSG00000002578	1409.28	-0.761818	0.110172	-6.91483	4.68439e-12	6.65409e-11
ENSMUSG00000002580	727.274	0.01272	0.0997071	0.127573	0.898487	0.950062
ENSMUSG00000002588	6.50278	0.954548	0.650292	1.46787	0.142138	0.290595
ENSMUSG00000002602	582.422	-0.0648267	0.0992561	-0.653126	0.513675	0.694758
ENSMUSG00000002603	109.683	0.0355144	0.193417	0.183615	0.854315	0.924769
ENSMUSG00000002608	1187.97	0.0478842	0.0892094	0.536762	0.591432	0.753672
ENSMUSG00000002617	951.018	0.31831	0.255786	1.24444	0.213337	0.389987
ENSMUSG00000002625	3297.73	-0.24416	0.071901	-3.39578	0.000684324	0.00319461
ENSMUSG00000002633	86.1152	-0.845368	0.201195	-4.20174	2.64868e-05	0.00016305
ENSMUSG00000002635	299.471	0.132483	0.102592	1.29136	0.19658	0.367534
ENSMUSG00000002658	1414.09	0.270295	0.102731	2.63109	0.00851121	0.029536
ENSMUSG00000002660	691.841	-0.155106	0.106142	-1.46131	0.14393	0.293276
ENSMUSG00000002661	153.753	-0.331206	0.136329	-2.42946	0.0151212	0.0481781
ENSMUSG00000002664	10.0615	0.0725777	0.471203	0.154026	0.877589	0.938298
ENSMUSG00000002668	153.645	-0.0295007	0.904718	-0.0326076	0.973987	0.987319
ENSMUSG00000002679	334.862	0.349604	0.108504	3.22204	0.0012728	0.00557413
ENSMUSG00000002688	193.678	1.58126	0.150331	10.5185	7.09642e-26	2.76156e-24
ENSMUSG00000002699	69.2196	-0.26282	0.222196	-1.18283	0.236877	0.420384
ENSMUSG00000002718	2443.42	0.14814	0.0769755	1.9245	0.0542913	0.13799
ENSMUSG00000002728	565.022	0.189598	0.0855416	2.21644	0.0266614	0.077351
ENSMUSG00000002731	1175.54	-0.260839	0.0611426	-4.26608	1.98934e-05	0.000125461
ENSMUSG00000002732	86.4843	0.417085	0.233103	1.78927	0.0735706	0.176699
ENSMUSG00000002733	501.364	0.258857	0.0808571	3.20142	0.00136752	0.00594805
ENSMUSG00000002741	3279.6	-0.0438149	0.0504684	-0.868164	0.385305	0.582548
ENSMUSG00000002748	5093.27	0.444218	0.0571549	7.77216	7.71561e-15	1.39892e-13
ENSMUSG00000002763	724.552	-0.183925	0.107079	-1.71765	0.0858608	0.199064
ENSMUSG00000002767	324.523	0.0733705	0.108808	0.674309	0.500115	0.683837
ENSMUSG00000002768	1223.57	-0.231977	0.113952	-2.03574	0.0417768	0.111465
ENSMUSG00000002769	31.8846	-0.243598	0.271452	-0.89739	0.369511	0.567874
ENSMUSG00000002771	1473.44	-1.70541	0.127557	-13.3698	9.08125e-41	8.62007e-39
ENSMUSG00000002778	1536.06	-0.117612	0.073832	-1.59296	0.111168	0.242262
ENSMUSG00000002781	215.368	-0.170491	0.113656	-1.50006	0.133599	0.277396
ENSMUSG00000002791	2.52404	-0.862271	0.978316	-0.881383	0.378111	0.575753
ENSMUSG00000002797	97.9938	0.428907	0.168508	2.54532	0.0109177	0.0366066
ENSMUSG00000002799	1463.64	-0.726424	0.0704251	-10.3148	6.03779e-25	2.23122e-23
ENSMUSG00000002803	608.683	-0.33799	0.0986167	-3.42731	0.000609602	0.00287686
ENSMUSG00000002804	157.568	0.23097	0.142434	1.6216	0.104889	0.232006
ENSMUSG00000002808	284.584	0.236955	0.118317	2.00271	0.0452079	0.118889
ENSMUSG00000002812	2230.73	-0.0698942	0.060272	-1.15965	0.246193	0.43166
ENSMUSG00000002814	316.17	0.318244	0.0918853	3.46349	0.000533211	0.00255167
ENSMUSG00000002820	543.003	0.081227	0.0819189	0.991553	0.321416	0.517278
ENSMUSG00000002825	458.065	-0.122904	0.0901899	-1.36273	0.172969	0.3353
ENSMUSG00000002831	26.6873	-0.663919	0.398712	-1.66516	0.0958815	0.216595
ENSMUSG00000002833	2436.06	0.00269008	0.0899536	0.0299052	0.976143	0.988333
ENSMUSG00000002835	480.49	1.13389	0.114219	9.92732	3.16661e-23	1.0705e-21
ENSMUSG00000002844	1428.69	-0.241655	0.0930354	-2.59745	0.00939187	0.0320997
ENSMUSG00000002845	453.62	0.0710608	0.0938205	0.757412	0.448803	0.640335
ENSMUSG00000002846	479.796	0.15296	0.108554	1.40906	0.158816	0.315267
ENSMUSG00000002847	8.37468	-0.823279	0.556725	-1.47879	0.139197	0.28616
ENSMUSG00000002870	999.881	1.2597	0.0907339	13.8834	7.98455e-44	8.62795e-42
ENSMUSG00000002871	536.423	-0.604448	0.0839129	-7.20328	5.8781e-13	9.06815e-12
ENSMUSG00000002881	430.658	0.458012	0.140692	3.25543	0.00113222	0.00501105
ENSMUSG00000002885	280.108	-0.054923	0.157264	-0.34924	0.726909	0.848189
ENSMUSG00000002897	183.666	0.424073	0.150439	2.81891	0.00481874	0.0180275
ENSMUSG00000002900	1437.79	0.22418	0.140688	1.59345	0.11106	0.242136
ENSMUSG00000002908	703.279	0.0551627	0.0854383	0.645644	0.51851	0.697717
ENSMUSG00000002910	173.826	0.175563	0.163279	1.07523	0.282271	0.47401
ENSMUSG00000002930	53.2989	-0.918978	0.257812	-3.56453	0.000364511	0.0018054
ENSMUSG00000002944	79.5294	-2.19826	0.297013	-7.40123	1.34931e-13	2.20677e-12
ENSMUSG00000002948	1453.39	-0.016078	0.0911916	-0.17631	0.860051	0.928194
ENSMUSG00000002949	1175.7	-0.153574	0.0711387	-2.1588	0.0308658	0.0871871
ENSMUSG00000002957	3215	-0.203783	0.0565219	-3.60539	0.000311689	0.00156686
ENSMUSG00000002963	445.091	-0.0608732	0.0877354	-0.693827	0.487791	0.673223
ENSMUSG00000002968	2718.5	0.00305969	0.100511	0.0304412	0.975715	0.988079
ENSMUSG00000002980	199.183	-0.431213	0.168725	-2.55572	0.0105968	0.0356591
ENSMUSG00000002981	2363.36	-0.426909	0.0773673	-5.51795	3.42979e-08	3.25433e-07
ENSMUSG00000002983	59.8692	-0.713832	0.228403	-3.12532	0.00177614	0.00748851
ENSMUSG00000002984	1006.85	-0.13144	0.0973531	-1.35013	0.176974	0.340485
ENSMUSG00000002985	2061.53	-0.448024	0.130408	-3.43555	0.000591341	0.00279996
ENSMUSG00000002992	0.110699	-0.638981	3.53381	-0.180819	0.856509	1
ENSMUSG00000002996	816.852	0.728491	0.101031	7.21059	5.57118e-13	8.60564e-12
ENSMUSG00000002997	3742.08	-0.0986705	0.0877903	-1.12393	0.261041	0.449449
ENSMUSG00000003031	2471.95	0.834847	0.0760391	10.9792	4.8126e-28	2.15322e-26
ENSMUSG00000003032	113.458	-0.262946	0.224506	-1.17122	0.241509	0.426214
ENSMUSG00000003033	2957.09	-0.143221	0.0743248	-1.92696	0.0539848	0.137475
ENSMUSG00000003037	1422.64	0.277666	0.084851	3.27239	0.00106641	0.00475107
ENSMUSG00000003038	308.834	0.535707	0.101243	5.2913	1.21451e-07	1.07761e-06
ENSMUSG00000003039	2549.53	0.225387	0.05396	4.17693	2.95469e-05	0.000180192
ENSMUSG00000003051	4.67995	0.00718201	0.795584	0.00902734	0.992797	0.996828
ENSMUSG00000003053	0	NA	NA	NA	NA	1
ENSMUSG00000003062	900.913	-0.0291971	0.143557	-0.203383	0.838836	0.915971
ENSMUSG00000003068	1527.35	0.260453	0.0958568	2.71711	0.00658552	0.0236713
ENSMUSG00000003070	927.721	-0.359942	0.151883	-2.36986	0.0177947	0.0550582
ENSMUSG00000003072	2094.72	-0.195024	0.120284	-1.62136	0.10494	0.232077
ENSMUSG00000003099	1556.64	-0.0595748	0.0811346	-0.734272	0.462783	0.65217
ENSMUSG00000003119	1384.36	0.26908	0.0858266	3.13516	0.00171763	0.00727095
ENSMUSG00000003123	296.347	0.266851	0.102215	2.61068	0.00903616	0.0310457
ENSMUSG00000003131	5794.71	-0.00264384	0.0527639	-0.050107	0.960037	0.980326
ENSMUSG00000003134	516.157	-0.141077	0.0929514	-1.51775	0.129078	0.270576
ENSMUSG00000003135	758.126	0.427288	0.0740148	5.77301	7.78677e-09	7.96277e-08
ENSMUSG00000003153	1016.65	-0.551898	0.0785129	-7.02939	2.07434e-12	3.04299e-11
ENSMUSG00000003154	998.431	-0.263701	0.112366	-2.34681	0.0189347	0.0579925
ENSMUSG00000003161	794.144	-0.18494	0.137135	-1.3486	0.177466	0.341171
ENSMUSG00000003166	1991.77	-0.066344	0.0589569	-1.1253	0.260463	0.448848
ENSMUSG00000003184	781.884	0.0636053	0.0936682	0.679049	0.497107	0.681172
ENSMUSG00000003190	126.958	0.431588	0.180861	2.3863	0.0170189	0.0530444
ENSMUSG00000003198	184.357	0.148265	0.160617	0.923098	0.355956	0.55415
ENSMUSG00000003199	1757.32	0.147511	0.081896	1.8012	0.0716716	0.172962
ENSMUSG00000003200	1062.21	-0.0213863	0.089683	-0.238466	0.81152	0.899521
ENSMUSG00000003206	38.6578	-0.909085	0.258961	-3.51052	0.000447237	0.00217377
ENSMUSG00000003208	276.114	0.164905	0.11372	1.4501	0.147032	0.298091
ENSMUSG00000003226	2912.29	0.367357	0.0974086	3.7713	0.000162401	0.000866158
ENSMUSG00000003227	25.2579	1.5906	0.407222	3.90598	9.38451e-05	0.000526624
ENSMUSG00000003228	605.55	0.027607	0.0816102	0.338279	0.735153	0.852956
ENSMUSG00000003233	3661.06	-0.123602	0.0915556	-1.35002	0.17701	0.340528
ENSMUSG00000003234	1127.46	-0.0950937	0.0698054	-1.36227	0.173113	0.335497
ENSMUSG00000003235	1342.26	0.0438602	0.062113	0.706135	0.480104	0.666987
ENSMUSG00000003269	3065.22	0.131912	0.0883377	1.49327	0.135366	0.28019
ENSMUSG00000003271	197.175	-0.221698	0.210191	-1.05475	0.291542	0.484236
ENSMUSG00000003273	1202.66	-0.750084	0.11928	-6.28843	3.20697e-10	3.82843e-09
ENSMUSG00000003279	1307.19	0.266555	0.105217	2.53339	0.0112966	0.0376682
ENSMUSG00000003282	183.855	0.319363	0.152051	2.10037	0.0356965	0.0982191
ENSMUSG00000003283	37.3637	-0.754511	0.25319	-2.98002	0.0028823	0.0115183
ENSMUSG00000003299	655.347	-0.0133189	0.108597	-0.122646	0.902388	0.952107
ENSMUSG00000003308	803.493	0.0152267	0.0865501	0.175929	0.86035	0.928351
ENSMUSG00000003309	18.2591	-1.1558	0.375935	-3.07447	0.00210874	0.00870875
ENSMUSG00000003316	4516.72	-0.0576206	0.0533505	-1.08004	0.280125	0.471485
ENSMUSG00000003341	44.898	-1.73946	0.316967	-5.48783	4.06911e-08	3.82199e-07
ENSMUSG00000003344	1341.4	-0.118911	0.0914784	-1.29988	0.193642	0.36337
ENSMUSG00000003345	2214.92	-0.0943621	0.110372	-0.854946	0.392581	0.589522
ENSMUSG00000003346	874.743	-0.178563	0.10243	-1.74326	0.0812875	0.191044
ENSMUSG00000003348	949.157	-0.0687998	0.0827759	-0.831157	0.405885	0.601436
ENSMUSG00000003352	5255.36	-0.264544	0.0986457	-2.68176	0.00732353	0.0259769
ENSMUSG00000003354	90.3748	-0.919047	0.178757	-5.14132	2.72809e-07	2.30403e-06
ENSMUSG00000003355	25.6351	-0.433019	0.314454	-1.37705	0.168496	0.328764
ENSMUSG00000003360	1731.61	0.191163	0.0581342	3.28831	0.0010079	0.00451531
ENSMUSG00000003363	1886.22	-0.480479	0.100473	-4.78217	1.73413e-06	1.30477e-05
ENSMUSG00000003378	4464.5	-0.325887	0.101364	-3.21502	0.00130434	0.00569471
ENSMUSG00000003379	9.45473	0.0121379	0.563557	0.0215379	0.982817	0.991831
ENSMUSG00000003380	666.918	-0.283509	0.113416	-2.49972	0.0124293	0.0408209
ENSMUSG00000003382	579.943	0.130428	0.0735681	1.77288	0.0762479	0.181625
ENSMUSG00000003402	1971.78	-0.163892	0.0709128	-2.31118	0.0208231	0.0628067
ENSMUSG00000003410	16206	-0.0599466	0.0970631	-0.617605	0.536836	0.712131
ENSMUSG00000003411	494.494	-0.872197	0.096347	-9.05266	1.39523e-19	3.74822e-18
ENSMUSG00000003418	48.7003	-1.12049	0.235585	-4.75622	1.97255e-06	1.47408e-05
ENSMUSG00000003420	193.943	-0.583672	0.240936	-2.42252	0.0154134	0.0489415
ENSMUSG00000003421	783.284	-0.047067	0.0854928	-0.550538	0.581951	0.746878
ENSMUSG00000003423	748.131	-0.127868	0.0904999	-1.41291	0.157683	0.313693
ENSMUSG00000003429	3683.08	0.284735	0.0679783	4.18861	2.80664e-05	0.000171856
ENSMUSG00000003435	3758.08	-0.0384181	0.0934381	-0.411161	0.680954	0.818681
ENSMUSG00000003436	278.658	-0.218352	0.136434	-1.60042	0.109506	0.239655
ENSMUSG00000003437	1824.66	0.078845	0.106036	0.743566	0.457139	0.647609
ENSMUSG00000003438	810.179	0.079139	0.109433	0.723176	0.469572	0.658327
ENSMUSG00000003444	168.472	-0.0192172	0.163787	-0.117331	0.906598	0.954029
ENSMUSG00000003452	1243.49	-0.230513	0.0731481	-3.15133	0.00162531	0.00692738
ENSMUSG00000003458	1882.93	0.00622136	0.0757911	0.0820857	0.934579	0.968306
ENSMUSG00000003464	1769.63	0.0590597	0.062752	0.94116	0.346623	0.544522
ENSMUSG00000003469	136.886	-0.130274	0.168164	-0.774686	0.438525	0.631344
ENSMUSG00000003476	27.634	-0.778217	0.30025	-2.5919	0.00954478	0.0325396
ENSMUSG00000003477	0.592939	-0.422263	1.93549	-0.218169	0.827298	1
ENSMUSG00000003484	0.647856	-0.51528	2.07394	-0.248455	0.803782	1
ENSMUSG00000003500	1135.94	-0.181687	0.078143	-2.32506	0.0200686	0.0608346
ENSMUSG00000003505	7.57163	-0.120414	3.24737	-0.0370805	0.970421	0.985196
ENSMUSG00000003518	400.404	-0.693444	0.0904581	-7.66591	1.77572e-14	3.11234e-13
ENSMUSG00000003526	185.441	-0.115245	0.1194	-0.965204	0.334443	0.531237
ENSMUSG00000003527	883.362	0.072991	0.089731	0.813442	0.415965	0.610911
ENSMUSG00000003528	1383.71	-0.354281	0.0928774	-3.81451	0.000136455	0.000738736
ENSMUSG00000003531	786.449	-0.103471	0.0963843	-1.07353	0.283035	0.474996
ENSMUSG00000003534	3263.57	0.0968002	0.0869183	1.11369	0.265411	0.45443
ENSMUSG00000003541	58.9746	-0.668685	0.220264	-3.03584	0.00239869	0.00976622
ENSMUSG00000003545	7.00053	0.332135	0.582857	0.56984	0.568786	0.736812
ENSMUSG00000003546	693.837	0.0846566	0.0851482	0.994227	0.320112	0.515626
ENSMUSG00000003549	481.218	0.173797	0.135478	1.28284	0.199546	0.371512
ENSMUSG00000003555	39.1883	0.399365	0.840818	0.474972	0.634807	0.785418
ENSMUSG00000003559	305.294	-0.949592	0.106285	-8.9344	4.094e-19	1.05533e-17
ENSMUSG00000003573	710.784	0.507734	0.0945123	5.37215	7.78023e-08	7.07971e-07
ENSMUSG00000003575	3088.92	-0.318214	0.0932906	-3.411	0.000647258	0.0030374
ENSMUSG00000003581	906.285	-0.0635293	0.0790384	-0.803777	0.421526	0.615679
ENSMUSG00000003585	154.601	-1.28175	0.157851	-8.12001	4.6615e-16	9.24093e-15
ENSMUSG00000003604	119.374	-0.286852	0.150228	-1.90945	0.0562045	0.142067
ENSMUSG00000003617	354.622	-0.929134	0.201674	-4.60712	4.08294e-06	2.90926e-05
ENSMUSG00000003623	341.603	0.275829	0.144507	1.90875	0.0562944	0.14222
ENSMUSG00000003644	337.809	-0.702062	0.0986236	-7.1186	1.09028e-12	1.64119e-11
ENSMUSG00000003657	780.102	-0.482695	0.142134	-3.39606	0.000683635	0.00319263
ENSMUSG00000003660	4797.96	0.196695	0.0615536	3.1955	0.00139587	0.00605718
ENSMUSG00000003662	801.557	0.0755671	0.0746549	1.01222	0.311434	0.506025
ENSMUSG00000003665	21.5802	0.325617	0.376088	0.865799	0.3866	0.583905
ENSMUSG00000003680	354.281	-0.00737636	0.100066	-0.0737149	0.941237	0.971328
ENSMUSG00000003721	531.661	0.0167194	0.135409	0.123473	0.901733	0.951807
ENSMUSG00000003731	2032.16	-0.133724	0.0608659	-2.19703	0.028018	0.0804969
ENSMUSG00000003746	351.302	-0.641697	0.10752	-5.96817	2.39933e-09	2.60313e-08
ENSMUSG00000003752	227.44	-0.0945878	0.123276	-0.767284	0.442913	0.635301
ENSMUSG00000003762	496.524	-0.0369301	0.114429	-0.322733	0.746897	0.859652
ENSMUSG00000003778	3256.74	0.134208	0.0568087	2.36246	0.0181542	0.0559989
ENSMUSG00000003779	472.32	1.48988	0.117101	12.7231	4.40321e-37	3.50591e-35
ENSMUSG00000003808	1409.26	0.0388206	0.0746025	0.520365	0.602809	0.761222
ENSMUSG00000003809	548.546	0.0116551	0.0887094	0.131385	0.895471	0.948406
ENSMUSG00000003810	5752.08	-0.00690649	0.068791	-0.100398	0.920028	0.960462
ENSMUSG00000003812	160.869	-0.091786	0.128186	-0.71604	0.473967	0.662169
ENSMUSG00000003813	491.183	-0.105179	0.0940342	-1.11852	0.263344	0.452139
ENSMUSG00000003814	10456.6	-0.237804	0.102593	-2.31794	0.0204524	0.0618041
ENSMUSG00000003824	189.336	0.899263	0.139235	6.4586	1.05678e-10	1.3233e-09
ENSMUSG00000003847	3695.87	0.092317	0.0812393	1.13636	0.255807	0.443443
ENSMUSG00000003848	794.369	0.20249	0.0803	2.52167	0.0116801	0.0387626
ENSMUSG00000003849	49.4002	-0.676719	0.262008	-2.58281	0.00979979	0.0333011
ENSMUSG00000003863	1983.77	-0.607066	0.0746737	-8.12958	4.30773e-16	8.58885e-15
ENSMUSG00000003865	726.4	-0.204605	0.0847081	-2.41541	0.0157175	0.0497309
ENSMUSG00000003868	1331.76	0.289091	0.0680922	4.24558	2.18025e-05	0.000136505
ENSMUSG00000003872	79.615	-0.98501	0.191393	-5.14653	2.65352e-07	2.25047e-06
ENSMUSG00000003873	1075.85	0.0691889	0.100738	0.68682	0.492196	0.67674
ENSMUSG00000003882	3.37352	0.936449	1.07648	0.86992	0.384344	0.581515
ENSMUSG00000003923	761.324	0.197682	0.0989689	1.99742	0.0457796	0.120132
ENSMUSG00000003929	1852.78	0.360051	0.0947564	3.79975	0.000144843	0.000779442
ENSMUSG00000003934	5441.26	-0.442439	0.0870619	-5.08189	3.73696e-07	3.08819e-06
ENSMUSG00000003948	1980.21	-0.476967	0.0728842	-6.54417	5.98279e-11	7.66209e-10
ENSMUSG00000003949	356.27	-0.299035	0.142756	-2.09472	0.0361957	0.0992317
ENSMUSG00000003955	394.53	0.223592	0.103602	2.15819	0.0309132	0.0873007
ENSMUSG00000003970	7312.16	0.163279	0.0614073	2.65896	0.00783831	0.0275925
ENSMUSG00000003974	386.693	-1.15853	0.129054	-8.97712	2.77956e-19	7.2421e-18
ENSMUSG00000003992	2368.5	0.319062	0.0707246	4.51133	6.44237e-06	4.42675e-05
ENSMUSG00000004018	214.834	-0.0349125	0.136192	-0.256348	0.797682	0.891148
ENSMUSG00000004031	1468.12	0.313975	0.0914942	3.43164	0.000599942	0.00283736
ENSMUSG00000004032	836.861	-0.271605	0.0739839	-3.67113	0.000241477	0.00124123
ENSMUSG00000004035	589.347	0.380244	0.0963752	3.94545	7.96494e-05	0.000452137
ENSMUSG00000004038	0.606088	-1.64462	2.04376	-0.804704	0.420991	1
ENSMUSG00000004040	882.729	-0.337242	0.0880915	-3.82831	0.000129024	0.000703065
ENSMUSG00000004043	46.3212	-1.28746	0.259264	-4.96582	6.84104e-07	5.43265e-06
ENSMUSG00000004044	664.13	-0.343592	0.269714	-1.27391	0.202695	0.376129
ENSMUSG00000004054	446.498	-0.0801874	0.13213	-0.606884	0.543928	0.717324
ENSMUSG00000004056	1374.89	0.38803	0.0912993	4.25009	2.13683e-05	0.000134029
ENSMUSG00000004069	799.092	-0.190767	0.0655006	-2.91245	0.00358604	0.0139371
ENSMUSG00000004070	613.688	-0.0885204	0.0946804	-0.934939	0.34982	0.548257
ENSMUSG00000004071	1872.27	-0.127534	0.068732	-1.85553	0.0635203	0.156793
ENSMUSG00000004085	278.66	0.235363	0.144816	1.62525	0.104109	0.230811
ENSMUSG00000004096	1574.55	0.191482	0.0846828	2.26116	0.0237491	0.0702231
ENSMUSG00000004098	74.3173	-1.09028	0.21321	-5.11363	3.16018e-07	2.64862e-06
ENSMUSG00000004099	5370.83	0.127045	0.0598059	2.12428	0.0336465	0.0936537
ENSMUSG00000004100	638.683	0.0983668	0.100552	0.97827	0.327941	0.524361
ENSMUSG00000004105	401.091	-0.260227	0.208276	-1.24944	0.211506	0.387606
ENSMUSG00000004110	5330.5	-0.206389	0.0686511	-3.00634	0.00264412	0.0106597
ENSMUSG00000004113	4778.82	-0.68942	0.0570818	-12.0778	1.38442e-33	8.98387e-32
ENSMUSG00000004127	203.206	0.177731	0.123711	1.43666	0.150815	0.303675
ENSMUSG00000004151	534.999	1.00962	0.0990105	10.1971	2.04242e-24	7.32398e-23
ENSMUSG00000004187	2020.93	-1.19589	0.119607	-9.9985	1.54729e-23	5.29733e-22
ENSMUSG00000004207	9089.94	-0.317744	0.0758396	-4.18968	2.7935e-05	0.000171182
ENSMUSG00000004221	618.417	0.150153	0.0850265	1.76596	0.0774028	0.183788
ENSMUSG00000004231	122.477	-3.87616	0.769906	-5.03459	4.78877e-07	3.88316e-06
ENSMUSG00000004233	252.445	0.362865	0.11985	3.02767	0.00246451	0.010009
ENSMUSG00000004263	483.702	-0.295812	0.161326	-1.83363	0.0667095	0.163088
ENSMUSG00000004264	1910.52	0.0400812	0.0729805	0.549204	0.582865	0.747462
ENSMUSG00000004266	58.8392	0.16481	0.264232	0.623732	0.532803	0.709497
ENSMUSG00000004267	1892.27	-1.02458	0.104693	-9.78651	1.28662e-22	4.19148e-21
ENSMUSG00000004268	895.617	0.377612	0.070537	5.35339	8.63236e-08	7.78778e-07
ENSMUSG00000004270	513.391	-0.203896	0.0877633	-2.32325	0.0201656	0.0610518
ENSMUSG00000004285	939.037	-0.0816792	0.0795203	-1.02715	0.30435	0.498025
ENSMUSG00000004296	0.713686	-2.92471	1.89736	-1.54146	0.123205	1
ENSMUSG00000004317	960.381	-0.372917	0.0810151	-4.60306	4.16336e-06	2.95699e-05
ENSMUSG00000004319	2709.88	-0.0575213	0.0721201	-0.797577	0.425116	0.619353
ENSMUSG00000004328	517.257	-0.349293	0.164685	-2.12098	0.0339238	0.0942738
ENSMUSG00000004341	0.605897	-1.6426	1.8797	-0.87386	0.382195	1
ENSMUSG00000004344	0	NA	NA	NA	NA	1
ENSMUSG00000004347	621.312	-0.213041	0.164224	-1.29726	0.194543	0.364609
ENSMUSG00000004356	838.311	0.351564	0.0732248	4.80115	1.57755e-06	1.19252e-05
ENSMUSG00000004359	1.32523	-0.197308	1.29713	-0.152111	0.8791	1
ENSMUSG00000004360	3822.76	0.181961	0.101939	1.785	0.0742616	0.177971
ENSMUSG00000004364	3593.93	0.0184739	0.0719203	0.256867	0.797282	0.891058
ENSMUSG00000004366	1161.53	-0.467152	0.171872	-2.71803	0.00656725	0.0236161
ENSMUSG00000004371	12.2385	-0.577349	0.427301	-1.35115	0.176646	0.34018
ENSMUSG00000004383	1513.24	0.0938723	0.0680769	1.37892	0.167921	0.32789
ENSMUSG00000004393	612.464	0.135741	0.0737571	1.84038	0.0657129	0.161169
ENSMUSG00000004394	1071.5	0.331511	0.0699234	4.74106	2.12606e-06	1.5809e-05
ENSMUSG00000004415	799.195	-0.661105	0.112633	-5.86953	4.37042e-09	4.5914e-08
ENSMUSG00000004446	430.979	-0.641376	0.0876149	-7.3204	2.47229e-13	3.94996e-12
ENSMUSG00000004451	627.344	-0.488782	0.0847449	-5.76768	8.03682e-09	8.20115e-08
ENSMUSG00000004455	380.885	0.199692	0.112156	1.78049	0.0749961	0.179234
ENSMUSG00000004460	1129.54	-0.18508	0.0778325	-2.37793	0.0174103	0.0540622
ENSMUSG00000004462	310.071	0.134409	0.0976017	1.37712	0.168476	0.328764
ENSMUSG00000004473	43.6453	-0.165527	0.22687	-0.729614	0.465626	0.654766
ENSMUSG00000004500	555.21	0.00596511	0.0910393	0.0655224	0.947758	0.974632
ENSMUSG00000004508	1701.77	-0.0743208	0.081221	-0.915045	0.360168	0.55823
ENSMUSG00000004530	4463.47	0.159669	0.06279	2.54291	0.0109934	0.03684
ENSMUSG00000004535	2683.89	0.118085	0.0886619	1.33186	0.182907	0.348796
ENSMUSG00000004540	9.16756	-1.19126	3.24699	-0.36688	NA	1
ENSMUSG00000004542	5.46351	-0.274759	2.89174	-0.0950149	0.924303	0.962393
ENSMUSG00000004552	25.6999	-0.0922134	0.480001	-0.192111	0.847655	0.920893
ENSMUSG00000004558	2235.13	-0.0958298	0.0993437	-0.964629	0.33473	0.531428
ENSMUSG00000004561	1177.27	-0.162682	0.0773759	-2.10249	0.0355105	0.0978073
ENSMUSG00000004562	2583.86	-0.336265	0.0795036	-4.22956	2.34146e-05	0.00014562
ENSMUSG00000004565	1407.91	-0.597795	0.0603806	-9.90045	4.14415e-23	1.39318e-21
ENSMUSG00000004567	1838.13	-0.290229	0.0667155	-4.35025	1.35979e-05	8.83593e-05
ENSMUSG00000004568	1303.46	-0.0119615	0.0781386	-0.153081	0.878335	0.938801
ENSMUSG00000004591	1337.32	0.545582	0.069952	7.79937	6.22183e-15	1.13832e-13
ENSMUSG00000004609	64.076	0.40964	0.224227	1.82689	0.0677158	0.165061
ENSMUSG00000004610	145.606	-0.0814971	0.154898	-0.526133	0.598796	0.758592
ENSMUSG00000004612	0.225336	1.47359	3.52724	0.417773	0.676113	1
ENSMUSG00000004626	838.464	0.642769	0.0919285	6.99205	2.70893e-12	3.9476e-11
ENSMUSG00000004630	12.5279	-1.20354	0.592614	-2.03091	0.0422643	0.112419
ENSMUSG00000004631	663.143	-0.110811	0.0760598	-1.45689	0.145146	0.295281
ENSMUSG00000004633	801.963	0.302961	0.0693445	4.36893	1.24858e-05	8.1725e-05
ENSMUSG00000004637	243.58	-0.398863	0.109839	-3.63133	0.000281962	0.00143109
ENSMUSG00000004642	682.224	0.172676	0.0823708	2.09633	0.0360532	0.0988971
ENSMUSG00000004651	0.260484	1.50398	3.37725	0.445327	0.656084	1
ENSMUSG00000004654	0.151818	-0.638981	3.53381	-0.180819	0.856509	1
ENSMUSG00000004655	226.509	-0.426563	0.665724	-0.640751	0.521685	0.700276
ENSMUSG00000004661	354.879	0.0495406	0.0913053	0.542581	0.587418	0.750948
ENSMUSG00000004665	344.803	0.0805567	0.190858	0.422077	0.672969	0.813052
ENSMUSG00000004667	860.313	0.384211	0.0964443	3.98376	6.78324e-05	0.00039046
ENSMUSG00000004668	3.74965	-0.738734	0.833883	-0.885896	0.375674	0.573702
ENSMUSG00000004677	3086.15	0.163088	0.0514492	3.16988	0.00152503	0.00654724
ENSMUSG00000004698	465.202	0.0768631	0.0825936	0.930618	0.352051	0.550514
ENSMUSG00000004707	5.33127	-0.0731541	0.727518	-0.100553	0.919905	0.960376
ENSMUSG00000004709	1.86345	0.614057	1.08456	0.566182	0.57127	1
ENSMUSG00000004730	96.4958	0.343499	0.184856	1.8582	0.0631405	0.156013
ENSMUSG00000004748	66.6542	-0.394006	0.220915	-1.78351	0.0745027	0.178301
ENSMUSG00000004768	964.646	0.18295	0.0907279	2.01647	0.0437512	0.115788
ENSMUSG00000004771	2547.13	-0.111451	0.0867094	-1.28534	0.198674	0.37029
ENSMUSG00000004788	684.78	0.0909327	0.0847609	1.07281	0.283355	0.475338
ENSMUSG00000004789	2768.93	0.03524	0.0512237	0.687962	0.491477	0.676223
ENSMUSG00000004791	75.1297	-0.0889213	0.19328	-0.460065	0.64547	0.792995
ENSMUSG00000004798	3611.04	-0.0211457	0.0561965	-0.376282	0.706707	0.835198
ENSMUSG00000004814	11.2663	-0.208358	0.476457	-0.437308	0.661888	0.805278
ENSMUSG00000004815	779.691	-0.688347	0.0817263	-8.42259	3.68244e-17	8.06637e-16
ENSMUSG00000004821	0	NA	NA	NA	NA	1
ENSMUSG00000004837	96.3434	-0.142692	0.206015	-0.69263	0.488542	0.673683
ENSMUSG00000004842	0.357195	0.784367	2.66105	0.294759	0.768178	1
ENSMUSG00000004843	930.615	-0.722304	0.0775429	-9.31489	1.22076e-20	3.49272e-19
ENSMUSG00000004846	1627.99	-0.130634	0.0851758	-1.5337	0.125104	0.264444
ENSMUSG00000004849	1564.54	-0.103149	0.0826555	-1.24793	0.212055	0.388201
ENSMUSG00000004864	9.10455	0.00790154	0.582532	0.0135641	0.989178	0.994932
ENSMUSG00000004865	2834.75	0.126	0.0893336	1.41044	0.158409	0.314776
ENSMUSG00000004872	226.233	-4.74072	0.54092	-8.76418	1.88139e-18	4.57678e-17
ENSMUSG00000004880	525.745	0.719349	0.107197	6.71051	1.93946e-11	2.59219e-10
ENSMUSG00000004885	231.01	-0.85955	0.141384	-6.07956	1.20512e-09	1.35422e-08
ENSMUSG00000004891	4742.19	0.628825	0.087426	7.19266	6.3543e-13	9.78409e-12
ENSMUSG00000004892	1245.36	-0.673183	0.106423	-6.32555	2.52337e-10	3.0357e-09
ENSMUSG00000004894	7.3781	-0.982577	0.646097	-1.52079	0.128313	0.269612
ENSMUSG00000004895	1319.46	-0.0154873	0.0911541	-0.169903	0.865087	0.931469
ENSMUSG00000004896	1060.96	-0.0289542	0.0685006	-0.422685	0.672525	0.812719
ENSMUSG00000004897	4347.77	0.329411	0.0962749	3.42157	0.000622614	0.00293141
ENSMUSG00000004902	122.448	-1.64666	0.222617	-7.39685	1.39452e-13	2.27763e-12
ENSMUSG00000004929	869.422	0.38139	0.0785468	4.85558	1.20034e-06	9.18854e-06
ENSMUSG00000004931	325.708	-0.0357787	0.143581	-0.249188	0.803216	0.894844
ENSMUSG00000004933	533.906	-0.614298	0.111901	-5.48967	4.0269e-08	3.78823e-07
ENSMUSG00000004934	672.371	0.0193335	0.0903477	0.213989	0.830555	0.911686
ENSMUSG00000004936	654.558	-0.318595	0.0873673	-3.64662	0.000265717	0.0013569
ENSMUSG00000004937	3327.28	-0.0942781	0.0897043	-1.05099	0.293265	0.48603
ENSMUSG00000004939	4.60936	-0.542562	0.764556	-0.709643	0.477925	0.665502
ENSMUSG00000004945	606.885	-0.124468	0.0984246	-1.26461	0.206012	0.380505
ENSMUSG00000004947	466.663	0.0322542	0.104168	0.309638	0.756836	0.866403
ENSMUSG00000004948	0.480865	1.33641	2.43786	0.548191	0.583561	1
ENSMUSG00000004951	13.8473	-0.016044	0.406432	-0.0394753	0.968511	0.984468
ENSMUSG00000004952	417.488	-1.60731	0.108629	-14.7964	1.54643e-49	2.15123e-47
ENSMUSG00000004961	1931.48	-0.241617	0.102492	-2.35743	0.0184018	0.0566542
ENSMUSG00000004980	27411.3	0.374399	0.066824	5.60277	2.10958e-08	2.05095e-07
ENSMUSG00000004988	5.24755	0.493344	0.700034	0.704742	0.480971	0.667655
ENSMUSG00000004994	269.416	0.131754	0.132426	0.994924	0.319773	0.515217
ENSMUSG00000004996	199.558	-0.10629	0.113169	-0.939211	0.347622	0.545633
ENSMUSG00000005034	5746.23	-0.234553	0.0532047	-4.40851	1.04084e-05	6.89857e-05
ENSMUSG00000005043	107.047	-0.425992	0.188463	-2.26035	0.0237998	0.0703558
ENSMUSG00000005045	6379.61	-0.803824	0.0737917	-10.8932	1.2425e-27	5.3705e-26
ENSMUSG00000005054	303.238	0.1949	0.112033	1.73966	0.0819181	0.19219
ENSMUSG00000005057	1033.64	0.0290995	0.0872638	0.333466	0.738783	0.855467
ENSMUSG00000005069	1441.54	0.155396	0.0777939	1.99753	0.0457678	0.120114
ENSMUSG00000005078	823.466	0.132516	0.0823161	1.60985	0.107431	0.236099
ENSMUSG00000005087	88.345	-0.906699	0.193561	-4.68431	2.80908e-06	2.04616e-05
ENSMUSG00000005089	3719.85	-0.490209	0.107338	-4.56697	4.94819e-06	3.46359e-05
ENSMUSG00000005102	906.403	0.169383	0.0643728	2.63128	0.00850635	0.0295234
ENSMUSG00000005103	2949.65	-0.18351	0.0555902	-3.30112	0.000962986	0.00433335
ENSMUSG00000005107	15.7219	-0.177519	0.423397	-0.419273	0.675017	0.814496
ENSMUSG00000005124	74.137	-0.556624	0.290305	-1.91738	0.0551897	0.139881
ENSMUSG00000005125	928.148	1.25812	0.124842	10.0777	6.93518e-24	2.41882e-22
ENSMUSG00000005131	1.85165	-0.444212	1.14851	-0.386774	0.698923	1
ENSMUSG00000005142	624.538	-0.0362589	0.112531	-0.322212	0.747292	0.859828
ENSMUSG00000005148	148.345	0.115873	0.161628	0.716913	0.473428	0.6617
ENSMUSG00000005150	568.169	-0.0689616	0.0860074	-0.80181	0.422663	0.616819
ENSMUSG00000005161	8688.01	0.215693	0.0529247	4.07546	4.59233e-05	0.000271778
ENSMUSG00000005198	5276.47	0.228635	0.117477	1.94621	0.05163	0.132524
ENSMUSG00000005202	1.98487	0.916762	1.25551	0.730189	0.465275	1
ENSMUSG00000005204	2139.84	-0.00519443	0.0696832	-0.0745436	0.940578	0.970985
ENSMUSG00000005220	78.6604	-4.28422	0.380435	-11.2614	2.03559e-29	9.93375e-28
ENSMUSG00000005225	960.824	0.215109	0.0818841	2.62699	0.00861427	0.0298338
ENSMUSG00000005232	1.7447	0.0576615	1.08465	0.0531615	0.957603	1
ENSMUSG00000005233	291.256	1.57239	0.1642	9.57605	1.00824e-21	3.12879e-20
ENSMUSG00000005237	501.165	-0.749265	0.0833348	-8.99103	2.44922e-19	6.42291e-18
ENSMUSG00000005251	17.7693	0.565287	0.404742	1.39666	0.162516	0.320334
ENSMUSG00000005262	1283.28	0.135749	0.0622969	2.17907	0.0293266	0.0834823
ENSMUSG00000005267	714.261	0.301173	0.0883242	3.40985	0.000649983	0.00304841
ENSMUSG00000005268	77.3599	-1.11779	0.21453	-5.2104	1.88436e-07	1.6278e-06
ENSMUSG00000005299	1487.78	-0.0234646	0.0679323	-0.345412	0.729785	0.850176
ENSMUSG00000005312	3748.23	0.0918353	0.0572483	1.60416	0.108679	0.238342
ENSMUSG00000005320	63.555	-0.188266	0.192083	-0.98013	0.327022	0.523392
ENSMUSG00000005338	8076.15	-0.791724	0.0743596	-10.6472	1.79627e-26	7.30735e-25
ENSMUSG00000005339	0	NA	NA	NA	NA	1
ENSMUSG00000005354	1504.14	0.137024	0.104315	1.31357	0.188992	0.357418
ENSMUSG00000005355	0.588174	-1.56459	2.04595	-0.764726	0.444435	1
ENSMUSG00000005357	209.152	-1.78771	0.150052	-11.9139	1.00182e-32	6.13902e-31
ENSMUSG00000005360	4199.8	-0.308374	0.0920995	-3.34827	0.000813167	0.00372567
ENSMUSG00000005362	686.394	0.186194	0.102787	1.81146	0.0700693	0.169739
ENSMUSG00000005364	1.15655	0.771297	1.80376	0.427606	0.668938	1
ENSMUSG00000005370	1230.22	0.537821	0.0846847	6.35086	2.14108e-10	2.59124e-09
ENSMUSG00000005371	4339.54	0.23229	0.0888441	2.61459	0.00893359	0.0307636
ENSMUSG00000005373	49.8375	0.215183	0.268689	0.800864	0.42321	0.617283
ENSMUSG00000005374	630.671	0.380341	0.0733434	5.18576	2.15137e-07	1.83908e-06
ENSMUSG00000005378	633.038	0.0659636	0.0778972	0.846803	0.397105	0.593868
ENSMUSG00000005397	2368.94	-0.836057	0.132572	-6.30644	2.85529e-10	3.4214e-09
ENSMUSG00000005410	816.631	1.12979	0.0976556	11.5691	5.91074e-31	3.17227e-29
ENSMUSG00000005413	177.093	-0.227181	0.182935	-1.24186	0.214287	0.39116
ENSMUSG00000005417	6641.15	0.276803	0.0408727	6.77234	1.26719e-11	1.71931e-10
ENSMUSG00000005442	6723.82	0.0895278	0.107204	0.835119	0.403651	0.599436
ENSMUSG00000005447	2811.81	-0.216794	0.0836344	-2.59216	0.0095375	0.032524
ENSMUSG00000005465	21.7514	-0.608583	0.324522	-1.87532	0.0607486	0.151169
ENSMUSG00000005469	3097.86	-0.460144	0.0727693	-6.32333	2.55991e-10	3.07506e-09
ENSMUSG00000005470	126.9	1.08498	0.202048	5.36992	7.87703e-08	7.16511e-07
ENSMUSG00000005474	0	NA	NA	NA	NA	1
ENSMUSG00000005481	843.262	0.132969	0.0777311	1.71062	0.0871507	0.201306
ENSMUSG00000005483	808.242	-0.152144	0.0882726	-1.72357	0.0847851	0.197285
ENSMUSG00000005493	6.02271	0.304509	0.609128	0.499909	0.617139	0.773021
ENSMUSG00000005501	1032.34	0.310146	0.0789793	3.92693	8.60377e-05	0.000485668
ENSMUSG00000005503	39.466	-7.98846	1.06256	-7.51809	5.55809e-14	9.36212e-13
ENSMUSG00000005505	308.551	0.0717561	0.0987489	0.726652	0.467439	0.656438
ENSMUSG00000005506	6445.84	0.315636	0.0480148	6.57372	4.90733e-11	6.32491e-10
ENSMUSG00000005510	817.903	0.0115296	0.0753711	0.152971	0.878421	0.938819
ENSMUSG00000005514	1679.03	-0.126489	0.101877	-1.24159	0.214387	0.391198
ENSMUSG00000005533	3845.03	0.00327842	0.0659259	0.0497288	0.960338	0.980449
ENSMUSG00000005534	2741.71	0.196698	0.068285	2.88055	0.00396985	0.0152379
ENSMUSG00000005540	18.057	0.146527	0.426858	0.343268	0.731397	0.851005
ENSMUSG00000005547	12.4619	-1.7718	0.467649	-3.78874	0.000151416	0.000811203
ENSMUSG00000005553	32.3549	-0.317958	0.275078	-1.15589	0.247728	0.4336
ENSMUSG00000005566	6973.85	0.308333	0.0528755	5.8313	5.49977e-09	5.70604e-08
ENSMUSG00000005575	2680.1	-0.209587	0.0883576	-2.37203	0.0176907	0.0547854
ENSMUSG00000005580	294.405	-0.612854	0.104989	-5.83731	5.30499e-09	5.50868e-08
ENSMUSG00000005583	1961.09	2.62968	0.107509	24.4602	3.91663e-132	5.92513e-129
ENSMUSG00000005609	2637.11	0.0297623	0.0628182	0.473785	0.635653	0.785962
ENSMUSG00000005610	37817.8	0.0900483	0.0623679	1.44382	0.148789	0.300595
ENSMUSG00000005611	67.5356	-0.252	0.248774	-1.01297	0.311076	0.505546
ENSMUSG00000005615	1252.26	-0.0191987	0.0650065	-0.295335	0.767738	0.873636
ENSMUSG00000005621	1335.63	-0.0475688	0.0650051	-0.73177	0.464309	0.653559
ENSMUSG00000005625	1962.88	0.166722	0.0631665	2.6394	0.00830527	0.0289709
ENSMUSG00000005628	79.8165	0.402898	0.190401	2.11605	0.0343402	0.0952232
ENSMUSG00000005640	81.3922	0.0743703	0.182575	0.407342	0.683757	0.820583
ENSMUSG00000005649	6.46056	-0.32126	0.611397	-0.525452	0.599269	0.758622
ENSMUSG00000005656	1353.41	0.0785334	0.0973129	0.807019	0.419656	0.614075
ENSMUSG00000005667	363.106	-0.398191	0.0984701	-4.04377	5.25984e-05	0.000308941
ENSMUSG00000005672	1785.16	-0.349713	0.0672135	-5.20302	1.96075e-07	1.68897e-06
ENSMUSG00000005674	185.933	-0.0448939	0.119258	-0.376442	0.706588	0.835106
ENSMUSG00000005677	22.3157	-0.221139	0.309978	-0.713403	0.475596	0.663542
ENSMUSG00000005681	28.4265	-0.616414	0.60662	-1.01615	0.30956	0.503792
ENSMUSG00000005682	1568.57	0.23481	0.0613588	3.82684	0.000129798	0.000706965
ENSMUSG00000005683	4998.75	-0.150015	0.0547247	-2.74127	0.00612017	0.022223
ENSMUSG00000005686	243.43	-0.912564	0.175164	-5.20978	1.89066e-07	1.63236e-06
ENSMUSG00000005687	1680.25	0.0236607	0.0681763	0.347052	0.728552	0.849206
ENSMUSG00000005696	3.48063	0.597137	0.978962	0.609969	0.541882	0.716175
ENSMUSG00000005698	3114.75	0.427197	0.0599259	7.12875	1.01281e-12	1.53029e-11
ENSMUSG00000005699	240.075	0.033903	0.117459	0.288637	0.772859	0.877132
ENSMUSG00000005705	18.4112	-0.22003	0.369901	-0.594833	0.551955	0.723574
ENSMUSG00000005716	23.0783	-4.17584	0.656261	-6.36308	1.97747e-10	2.40647e-09
ENSMUSG00000005718	254.26	0.516567	0.137875	3.74665	0.000179215	0.000947555
ENSMUSG00000005732	1742.56	0.227101	0.0774751	2.93128	0.00337564	0.0132341
ENSMUSG00000005763	14.2297	0.262091	0.393496	0.666057	0.505375	0.68792
ENSMUSG00000005774	596.086	-0.156718	0.072534	-2.16061	0.0307254	0.0868515
ENSMUSG00000005779	1768.85	0.0665981	0.102839	0.647594	0.517248	0.696917
ENSMUSG00000005800	0.251795	0.0823578	3.42437	0.0240505	0.980812	1
ENSMUSG00000005802	726.453	0.156593	0.104392	1.50004	0.133604	0.277396
ENSMUSG00000005803	36.2998	0.109521	0.259988	0.421253	0.67357	0.813318
ENSMUSG00000005804	1336.22	-0.176577	0.0628258	-2.81058	0.00494528	0.0184552
ENSMUSG00000005813	1146.11	0.0251566	0.0747387	0.336593	0.736423	0.853898
ENSMUSG00000005823	354.893	-0.213017	0.103116	-2.0658	0.0388478	0.105016
ENSMUSG00000005824	0.291709	1.65134	3.27222	0.504654	0.613802	1
ENSMUSG00000005836	17.5253	-0.0166673	0.495656	-0.0336268	0.973175	0.986874
ENSMUSG00000005846	1705.12	0.325352	0.0617548	5.26845	1.37578e-07	1.20917e-06
ENSMUSG00000005864	3.12335	-0.559475	0.894639	-0.625364	0.531732	0.708693
ENSMUSG00000005871	13227.7	0.231017	0.0615865	3.7511	0.000176063	0.000932112
ENSMUSG00000005873	4094.36	-0.778472	0.0703661	-11.0632	1.89268e-28	8.61135e-27
ENSMUSG00000005881	2248.94	-0.210174	0.0811053	-2.59137	0.00955952	0.0325761
ENSMUSG00000005882	536.497	0.16866	0.0909287	1.85486	0.0636163	0.156918
ENSMUSG00000005883	21.5115	-0.521588	0.379418	-1.3747	0.169223	0.329901
ENSMUSG00000005886	2452.54	0.0108802	0.0555539	0.19585	0.844728	0.918926
ENSMUSG00000005891	0.151818	-0.638981	3.53381	-0.180819	0.856509	1
ENSMUSG00000005892	34.6632	0.619419	0.377677	1.64008	0.100989	0.225586
ENSMUSG00000005893	1805.31	0.260904	0.0770738	3.38512	0.000711469	0.00330725
ENSMUSG00000005897	366.719	-0.0707293	0.102074	-0.69292	0.488359	0.673562
ENSMUSG00000005899	1748.81	0.119545	0.0601404	1.98776	0.0468384	0.122485
ENSMUSG00000005907	637.237	0.0711452	0.0728079	0.977163	0.328488	0.524694
ENSMUSG00000005917	573.997	0.125083	0.173097	0.722618	0.469915	0.658539
ENSMUSG00000005936	2670.78	0.23282	0.0648693	3.58907	0.000331861	0.00165759
ENSMUSG00000005947	15.0189	1.08611	0.42791	2.53817	0.0111433	0.0372597
ENSMUSG00000005949	606.125	0.0544777	0.0780179	0.698271	0.485008	0.670845
ENSMUSG00000005950	17.9208	1.31311	0.398656	3.29384	0.000988304	0.0044382
ENSMUSG00000005951	37.8328	-0.469653	0.252897	-1.85709	0.0632982	0.156328
ENSMUSG00000005952	4.46924	-4.7966	1.19433	-4.01615	5.91564e-05	0.000344285
ENSMUSG00000005958	566.625	-0.992531	0.098673	-10.0588	8.40262e-24	2.91801e-22
ENSMUSG00000005968	99.4863	-0.319074	0.17332	-1.84095	0.0656284	0.161076
ENSMUSG00000005973	1111.94	0.110042	0.0849532	1.29532	0.195208	0.365515
ENSMUSG00000005980	245.605	-0.0348215	0.110134	-0.316175	0.751869	0.862926
ENSMUSG00000005981	1026.24	0.102128	0.0778411	1.31201	0.189517	0.358016
ENSMUSG00000005982	1264.51	-0.255013	0.066681	-3.82438	0.000131103	0.000713326
ENSMUSG00000005983	79.64	-0.101683	0.188924	-0.538223	0.590423	0.75304
ENSMUSG00000005986	1020.45	-1.04337	0.105302	-9.90833	3.82996e-23	1.28935e-21
ENSMUSG00000005994	5.20177	0.68868	0.669488	1.02867	0.303636	0.49716
ENSMUSG00000006005	5055.9	0.185055	0.0648968	2.85153	0.00435087	0.0165326
ENSMUSG00000006007	0.383293	0.828341	2.61644	0.31659	0.751554	1
ENSMUSG00000006010	877.607	0.241193	0.0940025	2.56582	0.0102933	0.0347353
ENSMUSG00000006014	14.7753	-0.459633	0.439984	-1.04466	0.296181	0.489389
ENSMUSG00000006019	599.3	-0.10424	0.107971	-0.965449	0.33432	0.531159
ENSMUSG00000006021	458.135	-0.319922	0.118946	-2.68963	0.00715303	0.0254579
ENSMUSG00000006024	1933.8	-0.215342	0.0799877	-2.69219	0.00709852	0.0252862
ENSMUSG00000006050	621.145	-0.135204	0.077696	-1.74017	0.0818294	0.192038
ENSMUSG00000006056	0.624681	2.81675	1.95352	1.44189	0.149334	1
ENSMUSG00000006057	202.632	-0.444283	0.366764	-1.21136	0.225758	0.406129
ENSMUSG00000006058	681.899	-0.049151	0.0776702	-0.632817	0.526853	0.704518
ENSMUSG00000006095	1458	-0.11568	0.0640613	-1.80578	0.0709533	0.171588
ENSMUSG00000006127	1012.44	0.227917	0.071217	3.20032	0.00137273	0.0059675
ENSMUSG00000006134	2163.81	0.3066	0.0681388	4.49964	6.80695e-06	4.65036e-05
ENSMUSG00000006143	0.85425	-0.207016	1.75382	-0.118037	0.906038	1
ENSMUSG00000006154	44.4286	-0.299178	0.245637	-1.21797	0.223235	0.402729
ENSMUSG00000006169	1529.32	0.133119	0.0657777	2.02377	0.0429939	0.114083
ENSMUSG00000006179	0.668367	-1.73552	2.23362	-0.776996	0.437161	1
ENSMUSG00000006191	238.889	0.293424	0.117113	2.50548	0.0122286	0.0402985
ENSMUSG00000006200	0	NA	NA	NA	NA	1
ENSMUSG00000006204	1.0736	-0.933551	1.51204	-0.617412	0.536963	1
ENSMUSG00000006205	213.817	0.609167	0.18204	3.34633	0.000818882	0.00374618
ENSMUSG00000006215	996.381	0.349864	0.0990211	3.53323	0.000410514	0.00201021
ENSMUSG00000006216	1.09139	-1.58929	1.75823	-0.903917	0.366039	1
ENSMUSG00000006218	459.419	-1.21188	0.156851	-7.72627	1.10741e-14	1.97536e-13
ENSMUSG00000006219	882.805	-0.731246	0.11232	-6.51038	7.49629e-11	9.49988e-10
ENSMUSG00000006221	4.16464	-1.42185	0.825467	-1.72248	0.0849835	0.197696
ENSMUSG00000006235	32.6093	0.0216862	0.294384	0.0736662	0.941276	0.971328
ENSMUSG00000006241	249.99	-0.402787	0.11912	-3.38136	0.000721282	0.00334841
ENSMUSG00000006262	1072.19	0.422796	0.0894209	4.72816	2.26569e-06	1.67351e-05
ENSMUSG00000006269	4.99332	2.11636	0.774058	2.73411	0.00625492	0.0226681
ENSMUSG00000006270	69.6877	3.6775	1.21567	3.02507	0.00248576	0.0100834
ENSMUSG00000006273	3811.59	-0.291176	0.0872732	-3.33637	0.000848805	0.00387014
ENSMUSG00000006276	2607.8	0.0838181	0.0787104	1.06489	0.286924	0.478965
ENSMUSG00000006281	193.16	-0.323958	0.172336	-1.87981	0.0601343	0.150026
ENSMUSG00000006288	1375.94	0.0238087	0.0903641	0.263475	0.792184	0.88751
ENSMUSG00000006289	398.611	0.182331	0.0973095	1.87372	0.0609691	0.151609
ENSMUSG00000006299	1957.48	0.0290874	0.0764132	0.380659	0.703456	0.83348
ENSMUSG00000006301	154.476	-0.131202	0.153416	-0.855205	0.392438	0.589385
ENSMUSG00000006304	3566.47	-0.0371224	0.0954715	-0.388832	0.6974	0.829363
ENSMUSG00000006307	3956.91	-0.0439597	0.0856207	-0.513424	0.607655	0.765379
ENSMUSG00000006310	12.2737	-0.335122	0.443173	-0.756188	0.449537	0.640957
ENSMUSG00000006311	0.151818	-0.638981	3.53381	-0.180819	0.856509	1
ENSMUSG00000006313	22.8449	-0.545258	0.392882	-1.38784	0.165185	0.323967
ENSMUSG00000006315	862.659	-0.210586	0.0959188	-2.19546	0.0281305	0.0807614
ENSMUSG00000006333	5966	0.310966	0.0558804	5.56485	2.62385e-08	2.52727e-07
ENSMUSG00000006335	307.359	-0.0270466	0.0967847	-0.279451	0.779899	0.8813
ENSMUSG00000006342	100.963	-1.22442	0.192072	-6.37479	1.83218e-10	2.23866e-09
ENSMUSG00000006344	71.8872	0.189689	0.224853	0.843612	0.398886	0.595529
ENSMUSG00000006345	35.0276	-0.698507	0.270859	-2.57886	0.00991262	0.0336326
ENSMUSG00000006356	2252.81	0.192843	0.100679	1.91542	0.055439	0.140425
ENSMUSG00000006360	33.9301	0.441995	0.299262	1.47695	0.139689	0.28688
ENSMUSG00000006362	1569.44	-0.58984	0.100337	-5.87859	4.1378e-09	4.35269e-08
ENSMUSG00000006369	532.46	0.295355	0.134207	2.20075	0.0277538	0.0799264
ENSMUSG00000006373	5132.4	-0.385816	0.0890347	-4.33332	1.46875e-05	9.48538e-05
ENSMUSG00000006378	20.5902	-0.0053911	0.34885	-0.0154539	0.98767	0.994201
ENSMUSG00000006386	300.647	-0.0453552	0.176951	-0.256316	0.797707	0.891148
ENSMUSG00000006389	1.74672	-1.78886	1.27755	-1.40023	0.161446	1
ENSMUSG00000006390	238.848	-0.25141	0.129247	-1.94518	0.0517531	0.13277
ENSMUSG00000006392	654.035	0.199454	0.0744694	2.67833	0.00739902	0.0262177
ENSMUSG00000006395	242.947	-0.405258	0.131103	-3.09115	0.0019938	0.00828924
ENSMUSG00000006398	489.028	1.40472	0.122116	11.5032	1.27152e-30	6.7199e-29
ENSMUSG00000006403	102.761	0.40169	0.17587	2.28401	0.0223707	0.0667262
ENSMUSG00000006411	36.3904	-1.75189	0.283789	-6.17323	6.69079e-10	7.75997e-09
ENSMUSG00000006412	993.119	-0.047844	0.0786947	-0.60797	0.543208	0.716843
ENSMUSG00000006418	1632.34	0.138986	0.0731256	1.90065	0.0573481	0.144294
ENSMUSG00000006423	525.893	0.385364	0.0869032	4.4344	9.23294e-06	6.18382e-05
ENSMUSG00000006435	649.344	-0.708828	0.102832	-6.89308	5.45963e-12	7.69211e-11
ENSMUSG00000006442	1169.52	-0.01278	0.108941	-0.117311	0.906613	0.954029
ENSMUSG00000006445	86.1825	-0.737301	0.184382	-3.99878	6.36706e-05	0.000368431
ENSMUSG00000006456	1249.8	0.284105	0.0957403	2.96746	0.00300275	0.0119542
ENSMUSG00000006457	32.4496	-1.53529	0.293512	-5.23077	1.68802e-07	1.46551e-06
ENSMUSG00000006462	0.112935	-0.638981	3.53381	-0.180819	0.856509	1
ENSMUSG00000006463	441.005	-0.0696368	0.0972711	-0.715905	0.47405	0.662169
ENSMUSG00000006464	1116.29	-0.199039	0.0635046	-3.13425	0.00172292	0.00728952
ENSMUSG00000006469	0.923362	0.37619	1.71039	0.219944	0.825915	1
ENSMUSG00000006471	393.203	0.140289	0.0908115	1.54484	0.122386	0.260197
ENSMUSG00000006476	3013.95	0.294983	0.0712273	4.14143	3.45144e-05	0.00020792
ENSMUSG00000006488	0.27772	1.65126	3.51903	0.469238	0.6389	1
ENSMUSG00000006490	39.83	0.032453	3.22999	0.0100474	NA	1
ENSMUSG00000006494	664.905	-0.118432	0.0992774	-1.19294	0.232893	0.41517
ENSMUSG00000006498	2569.16	0.58034	0.0865005	6.70909	1.95845e-11	2.61613e-10
ENSMUSG00000006517	646.787	-0.406277	0.105867	-3.8376	0.000124243	0.000679157
ENSMUSG00000006519	74.7416	-0.253892	0.26607	-0.954229	0.339968	0.5371
ENSMUSG00000006522	79.6328	-1.35793	0.304652	-4.4573	8.29971e-06	5.59283e-05
ENSMUSG00000006526	448.338	-0.277227	0.0906208	-3.0592	0.00221932	0.00910795
ENSMUSG00000006527	923.697	0.123123	0.101072	1.21817	0.223158	0.402702
ENSMUSG00000006529	4.16391	0.86382	1.00085	0.863087	0.38809	0.585461
ENSMUSG00000006538	12.3848	-0.0668687	0.426057	-0.156948	0.875286	0.937274
ENSMUSG00000006542	0.719023	-1.95182	1.96802	-0.991769	0.32131	1
ENSMUSG00000006546	4.72376	-3.56867	1.06554	-3.34917	0.000810543	0.00371576
ENSMUSG00000006567	147.716	-0.294119	0.132684	-2.2167	0.0266437	0.0773088
ENSMUSG00000006570	0.112935	-0.638981	3.53381	-0.180819	0.856509	1
ENSMUSG00000006574	182.928	-0.414994	0.601566	-0.689856	0.490284	0.674894
ENSMUSG00000006575	4011.89	-0.0841616	0.0894323	-0.941065	0.346672	0.544564
ENSMUSG00000006576	2347.63	-0.69758	0.0842301	-8.28183	1.21292e-16	2.54189e-15
ENSMUSG00000006585	220.392	0.842904	0.166225	5.07086	3.96026e-07	3.25716e-06
ENSMUSG00000006586	3804.2	-0.78733	0.127242	-6.18765	6.10682e-10	7.10311e-09
ENSMUSG00000006587	0.151818	-0.638981	3.53381	-0.180819	0.856509	1
ENSMUSG00000006589	595.639	0.27747	0.123091	2.25419	0.0241842	0.0713268
ENSMUSG00000006599	898.31	0.238037	0.0837982	2.84059	0.00450299	0.0170304
ENSMUSG00000006611	47.564	-0.440207	0.276627	-1.59134	0.111533	0.242875
ENSMUSG00000006638	5.16438	-0.430628	0.686546	-0.627237	0.530504	0.707718
ENSMUSG00000006641	505.949	-0.550191	0.0955467	-5.75835	8.49413e-09	8.6423e-08
ENSMUSG00000006642	1.5122	1.17015	1.31482	0.889968	0.373483	1
ENSMUSG00000006649	49.96	-3.3026	0.422737	-7.81242	5.60999e-15	1.03262e-13
ENSMUSG00000006651	10163.8	-0.387584	0.0982483	-3.94495	7.9818e-05	0.000452988
ENSMUSG00000006673	2760.36	0.14757	0.0853877	1.72824	0.0839458	0.195846
ENSMUSG00000006675	285.709	-0.644092	0.114279	-5.63613	1.73913e-08	1.71028e-07
ENSMUSG00000006676	3882.33	0.0787167	0.0577578	1.36288	0.172922	0.335275
ENSMUSG00000006678	397.908	0.953784	0.161204	5.91664	3.28576e-09	3.4959e-08
ENSMUSG00000006699	7352.94	-0.147265	0.0605023	-2.43404	0.0149312	0.0476536
ENSMUSG00000006705	692.696	0.421861	0.0839954	5.02243	5.10228e-07	4.11532e-06
ENSMUSG00000006711	249.836	-0.904235	0.123686	-7.31073	2.65702e-13	4.23113e-12
ENSMUSG00000006715	121.375	1.14602	0.19122	5.9932	2.05747e-09	2.25038e-08
ENSMUSG00000006717	199.839	0.300994	0.145484	2.06891	0.0385542	0.104385
ENSMUSG00000006720	473.576	0.885596	0.101798	8.69953	3.33259e-18	7.8929e-17
ENSMUSG00000006724	19.9503	0.285403	0.354852	0.804289	0.42123	0.615536
ENSMUSG00000006728	5648.95	0.807132	0.063197	12.7717	2.36035e-37	1.89809e-35
ENSMUSG00000006731	1102.86	-0.53832	0.117191	-4.59354	4.35797e-06	3.08344e-05
ENSMUSG00000006732	240.236	0.0856982	0.109439	0.783068	0.433587	0.627052
ENSMUSG00000006736	663.139	0.105117	0.0832966	1.26196	0.206963	0.381794
ENSMUSG00000006740	3550.1	0.318083	0.0693815	4.58455	4.54965e-06	3.20501e-05
ENSMUSG00000006763	520.453	0.3161	0.0760018	4.15911	3.19496e-05	0.000193287
ENSMUSG00000006764	94.0315	-5.32421	0.400362	-13.2985	2.3618e-40	2.19032e-38
ENSMUSG00000006777	1.60488	-1.01171	1.27438	-0.793881	0.427265	1
ENSMUSG00000006782	390.161	-0.641364	0.122808	-5.2225	1.76523e-07	1.52816e-06
ENSMUSG00000006784	58.4485	-0.353336	0.216132	-1.63481	0.102089	0.227528
ENSMUSG00000006800	4168.76	-1.42945	0.104288	-13.7068	9.24445e-43	9.56247e-41
ENSMUSG00000006818	1553.73	-0.414449	0.0823607	-5.03212	4.85095e-07	3.92831e-06
ENSMUSG00000006850	217.163	0.224365	0.128276	1.74909	0.0802761	0.189237
ENSMUSG00000006906	929.688	-0.170694	0.0914516	-1.8665	0.0619714	0.153706
ENSMUSG00000006920	934.041	-0.269079	0.0724434	-3.71433	0.00020374	0.00106444
ENSMUSG00000006930	6809.21	-1.08473	0.110865	-9.78421	1.3162e-22	4.28207e-21
ENSMUSG00000006931	271.555	-0.22813	0.195891	-1.16458	0.24419	0.429145
ENSMUSG00000006932	13494.4	0.39827	0.0786565	5.06341	4.11832e-07	3.38026e-06
ENSMUSG00000006941	1864.92	0.504788	0.0910379	5.54481	2.94268e-08	2.81978e-07
ENSMUSG00000006948	13.48	-1.43744	0.604446	-2.37811	0.0174015	0.054042
ENSMUSG00000006958	390.491	-0.489669	0.112033	-4.37076	1.23816e-05	8.10869e-05
ENSMUSG00000006998	4365.08	0.0901066	0.061786	1.45837	0.144739	0.294628
ENSMUSG00000007021	1311.26	-0.63637	0.106142	-5.99545	2.02925e-09	2.22354e-08
ENSMUSG00000007029	2285.03	-0.0497787	0.0756823	-0.657733	0.51071	0.692301
ENSMUSG00000007030	14.9828	0.417046	0.416789	1.00062	0.317012	0.511927
ENSMUSG00000007033	31.6748	-0.0199184	0.371108	-0.0536728	0.957196	0.979203
ENSMUSG00000007034	1.75989	-2.61577	1.40196	-1.8658	0.0620694	1
ENSMUSG00000007035	83.7802	0.381244	0.295906	1.2884	0.197608	0.368842
ENSMUSG00000007036	837.069	-0.0949728	0.0849898	-1.11746	0.263797	0.452627
ENSMUSG00000007038	585.445	-0.197268	0.0855175	-2.30675	0.0210686	0.0634206
ENSMUSG00000007039	2822.23	0.478299	0.0770773	6.20545	5.45406e-10	6.37756e-09
ENSMUSG00000007041	731.327	0.334135	0.122301	2.73207	0.00629374	0.0227849
ENSMUSG00000007050	404.252	0.427285	0.0848899	5.0334	4.81868e-07	3.90349e-06
ENSMUSG00000007080	653.001	0.86005	0.0735306	11.6965	1.32833e-31	7.44262e-30
ENSMUSG00000007097	4519.53	-0.633855	0.136124	-4.65646	3.21697e-06	2.32092e-05
ENSMUSG00000007107	6.37945	-0.659828	0.627914	-1.05082	0.293339	0.486087
ENSMUSG00000007122	45.2669	1.06666	0.271954	3.92221	8.77391e-05	0.000494349
ENSMUSG00000007207	1804.05	-0.681132	0.0934818	-7.28625	3.18699e-13	5.02875e-12
ENSMUSG00000007209	1.2082	-0.0717782	1.52554	-0.0470509	0.962473	1
ENSMUSG00000007216	258.807	0.0876456	0.10576	0.828725	0.40726	0.602956
ENSMUSG00000007279	117.907	-1.01137	0.166565	-6.07191	1.26397e-09	1.41804e-08
ENSMUSG00000007338	822.849	0.18037	0.066155	2.72648	0.00640142	0.0230988
ENSMUSG00000007379	50.8493	-0.153794	0.233048	-0.659925	0.509302	0.691268
ENSMUSG00000007411	2780.43	0.0610714	0.0716438	0.852432	0.393975	0.590767
ENSMUSG00000007415	939.99	0.0221738	0.0912361	0.243038	0.807976	0.897555
ENSMUSG00000007440	64.1215	0.122114	0.233338	0.523334	0.600742	0.759684
ENSMUSG00000007457	0.676505	-0.887078	2.04176	-0.434467	0.663949	1
ENSMUSG00000007458	1109.02	0.100425	0.0606688	1.6553	0.0978629	0.21993
ENSMUSG00000007476	322.108	-0.136115	0.103928	-1.3097	0.190296	0.359011
ENSMUSG00000007480	39.5627	0.703499	0.243177	2.89295	0.00381648	0.0147263
ENSMUSG00000007564	8618.27	-0.3037	0.068169	-4.4551	8.38549e-06	5.64592e-05
ENSMUSG00000007570	335.075	0.1339	0.126358	1.05968	0.289288	0.481716
ENSMUSG00000007589	478.069	0.409059	0.101679	4.02303	5.74541e-05	0.000334942
ENSMUSG00000007591	29.9565	0.562262	0.327729	1.71563	0.0862298	0.199712
ENSMUSG00000007594	41.4558	-1.09954	0.266344	-4.12825	3.65531e-05	0.000219436
ENSMUSG00000007603	1907.59	-0.470112	0.0863042	-5.44715	5.11838e-08	4.74312e-07
ENSMUSG00000007610	388.143	-0.171668	0.0901377	-1.90451	0.0568432	0.143352
ENSMUSG00000007613	2163.35	0.267765	0.0812808	3.29432	0.000986592	0.00443216
ENSMUSG00000007617	1063.68	0.556908	0.0664651	8.37894	5.34055e-17	1.15521e-15
ENSMUSG00000007646	146.703	0.652031	0.145993	4.46619	7.96236e-06	5.38349e-05
ENSMUSG00000007653	1072.12	-0.892746	0.0814465	-10.9611	5.87602e-28	2.60017e-26
ENSMUSG00000007655	429.277	0.373056	0.1824	2.04526	0.0408291	0.109456
ENSMUSG00000007656	2925.16	0.121626	0.0877039	1.38677	0.165511	0.324361
ENSMUSG00000007659	2087.09	-0.0362802	0.0934266	-0.388329	0.697773	0.829711
ENSMUSG00000007670	3075.51	0.0151134	0.15289	0.098851	0.921257	0.960881
ENSMUSG00000007682	35.5441	3.16173	0.363301	8.70279	3.23815e-18	7.68352e-17
ENSMUSG00000007721	967.635	-0.0297213	0.0980066	-0.303258	0.761693	0.87002
ENSMUSG00000007739	3594.23	0.292731	0.0849542	3.44575	0.000569483	0.00270706
ENSMUSG00000007777	259.797	0.0177987	0.14377	0.1238	0.901474	0.951766
ENSMUSG00000007783	1553.11	-0.122959	0.0844244	-1.45643	0.145273	0.295465
ENSMUSG00000007805	8.50225	-0.655365	0.599915	-1.09243	0.274644	0.46553
ENSMUSG00000007812	687.715	0.266771	0.110248	2.41973	0.0155321	0.0492539
ENSMUSG00000007815	2435.59	0.172796	0.0807897	2.13884	0.0324484	0.0909255
ENSMUSG00000007817	11519.7	-0.339783	0.102818	-3.30471	0.000950732	0.00428298
ENSMUSG00000007827	2536.24	0.101949	0.587119	0.173644	0.862146	0.929662
ENSMUSG00000007833	322.415	0.298609	0.100343	2.97587	0.00292161	0.0116561
ENSMUSG00000007836	7059.04	0.321243	0.0794886	4.04137	5.31404e-05	0.000311897
ENSMUSG00000007837	139.71	-0.119237	0.176276	-0.676424	0.498772	0.682617
ENSMUSG00000007850	18557.5	0.458602	0.0751692	6.10092	1.05457e-09	1.19392e-08
ENSMUSG00000007867	222.991	0.391155	0.123282	3.17285	0.00150948	0.00649547
ENSMUSG00000007872	453.133	-0.567288	0.164115	-3.45666	0.000546914	0.00261003
ENSMUSG00000007877	7.52419	-0.0880641	0.547923	-0.160723	0.872311	0.935904
ENSMUSG00000007880	8932.74	0.108867	0.0788535	1.38062	0.167395	0.327262
ENSMUSG00000007888	46.1345	0.838245	0.266691	3.14313	0.00167153	0.00709688
ENSMUSG00000007891	1700.63	-0.224934	0.0921999	-2.43963	0.0147023	0.0470536
ENSMUSG00000007892	5179.26	0.179813	0.084167	2.13639	0.0326477	0.0913569
ENSMUSG00000007907	0.291709	1.65134	3.27222	0.504654	0.613802	1
ENSMUSG00000007908	421.565	-0.361796	0.0991806	-3.64785	0.000264439	0.00135151
ENSMUSG00000007944	612.152	-0.240585	0.140915	-1.70731	0.0877644	0.202376
ENSMUSG00000007946	10.7509	-4.4057	0.922394	-4.77637	1.78485e-06	1.34085e-05
ENSMUSG00000007950	1476.88	-0.385868	0.0939299	-4.10804	3.99029e-05	0.000238364
ENSMUSG00000007987	644.464	-0.168312	0.0918688	-1.83209	0.0669383	0.163496
ENSMUSG00000007989	4396.17	0.203481	0.0837107	2.43076	0.0150672	0.0480249
ENSMUSG00000008028	35.9062	-0.587347	0.29052	-2.02171	0.0432061	0.114508
ENSMUSG00000008035	920.496	-0.161325	0.110453	-1.46058	0.14413	0.293633
ENSMUSG00000008036	1829.64	-0.184226	0.0940793	-1.9582	0.050207	0.129614
ENSMUSG00000008090	188.076	0.517453	0.126918	4.07705	4.56099e-05	0.000270055
ENSMUSG00000008129	77.4416	0.508219	0.189678	2.67937	0.00737602	0.0261477
ENSMUSG00000008136	125.844	-0.558981	0.17614	-3.17351	0.00150606	0.00648536
ENSMUSG00000008140	1663.03	-0.131788	0.116207	-1.13408	0.256762	0.444495
ENSMUSG00000008153	2986.3	-1.06242	0.0910655	-11.6665	1.88931e-31	1.04408e-29
ENSMUSG00000008167	919.428	-0.178381	0.0712565	-2.50336	0.012302	0.0404965
ENSMUSG00000008193	1.5078	0.921693	1.4867	0.61996	0.535284	1
ENSMUSG00000008200	3502.02	0.133955	0.0677039	1.97853	0.0478686	0.1246
ENSMUSG00000008206	2173.76	-0.26191	0.0614876	-4.25955	2.0484e-05	0.000128984
ENSMUSG00000008226	142.911	0.0798706	0.144222	0.553805	0.579712	0.745242
ENSMUSG00000008301	1372.64	-0.032518	0.0690904	-0.470659	0.637884	0.787608
ENSMUSG00000008305	1841.48	0.0376207	0.0660627	0.569469	0.569038	0.736909
ENSMUSG00000008307	103.956	0.0596154	0.191897	0.310664	0.756056	0.865755
ENSMUSG00000008318	88.4494	-0.469851	0.197426	-2.37989	0.0173178	0.0538098
ENSMUSG00000008333	869.495	0.511878	0.115082	4.44794	8.66994e-06	5.82933e-05
ENSMUSG00000008348	2527.3	-0.374015	0.0604914	-6.18294	6.29192e-10	7.30787e-09
ENSMUSG00000008373	1152.55	0.267405	0.0696181	3.84103	0.000122519	0.000670642
ENSMUSG00000008384	48.3138	-0.28747	0.229408	-1.25309	0.210171	0.385945
ENSMUSG00000008393	2525.3	0.0201065	0.0621334	0.323603	0.746239	0.859269
ENSMUSG00000008398	406.19	0.0669909	0.127994	0.523389	0.600703	0.759684
ENSMUSG00000008429	910.79	0.121533	0.0710666	1.71013	0.0872426	0.20146
ENSMUSG00000008435	930.724	-0.466287	0.072772	-6.40751	1.47917e-10	1.82205e-09
ENSMUSG00000008438	19.6867	-0.960102	0.352182	-2.72616	0.00640765	0.0231117
ENSMUSG00000008450	118.894	0.151782	0.158501	0.957612	0.338259	0.534994
ENSMUSG00000008461	1.44451	0.0493554	1.30605	0.0377899	0.969855	1
ENSMUSG00000008475	2810.41	0.132575	0.0592576	2.23727	0.0252686	0.0740737
ENSMUSG00000008482	2.81236	-0.617344	0.97988	-0.63002	0.528681	0.705988
ENSMUSG00000008489	3983.42	-0.0715503	0.0673595	-1.06222	0.288137	0.480395
ENSMUSG00000008496	2055.49	-0.719096	0.116747	-6.15942	7.30137e-10	8.43579e-09
ENSMUSG00000008540	195.526	-1.02858	0.121632	-8.45647	2.7559e-17	6.12548e-16
ENSMUSG00000008575	9924.94	1.97939	0.0620216	31.9145	1.68056e-223	6.77966e-220
ENSMUSG00000008590	1.47105	-0.847914	1.3756	-0.616394	0.537634	1
ENSMUSG00000008601	4.87171	0.531278	0.769107	0.690772	0.489709	0.674536
ENSMUSG00000008604	2666.88	0.0134829	0.0854878	0.157717	0.87468	0.936881
ENSMUSG00000008658	2903.9	-0.61408	0.116458	-5.27298	1.34227e-07	1.1823e-06
ENSMUSG00000008668	290.783	0.191728	0.100286	1.91181	0.0559	0.141385
ENSMUSG00000008682	425.55	0.147763	0.102633	1.43972	0.149947	0.302305
ENSMUSG00000008683	4171.8	0.281201	0.120607	2.33156	0.0197239	0.0600102
ENSMUSG00000008690	1669.84	0.198422	0.0641128	3.09488	0.0019689	0.00820121
ENSMUSG00000008730	2617.22	0.00582164	0.0574353	0.10136	0.919265	0.960079
ENSMUSG00000008734	552.869	0.521281	0.0951933	5.47603	4.34968e-08	4.07131e-07
ENSMUSG00000008763	1757.81	-0.237219	0.0595765	-3.98176	6.84075e-05	0.000393396
ENSMUSG00000008789	32.8243	-0.392189	3.23097	-0.121384	NA	1
ENSMUSG00000008813	0	NA	NA	NA	NA	1
ENSMUSG00000008822	169.536	0.28248	0.130929	2.1575	0.0309668	0.0874215
ENSMUSG00000008843	3.26047	-0.753748	1.04035	-0.724513	0.468751	0.657708
ENSMUSG00000008845	38.6928	0.299193	0.350033	0.854756	0.392686	0.589593
ENSMUSG00000008855	2489.54	0.398483	0.0825074	4.82967	1.36761e-06	1.04e-05
ENSMUSG00000008859	3299.98	0.0584348	0.0720452	0.811085	0.417317	0.612154
ENSMUSG00000008874	1.08971	-3.52928	1.87597	-1.88131	0.0599301	1
ENSMUSG00000008892	1222.38	-0.20488	0.0860461	-2.38105	0.0172635	0.0536771
ENSMUSG00000008932	2.02755	0.438293	1.04472	0.41953	0.674829	1
ENSMUSG00000008958	1890.53	0.31381	0.0947034	3.31361	0.000921005	0.00416223
ENSMUSG00000008976	1190.63	0.397495	0.0744855	5.33654	9.47375e-08	8.52461e-07
ENSMUSG00000008999	457.824	-0.523278	0.202194	-2.588	0.00965354	0.0328456
ENSMUSG00000009013	3421.51	0.325133	0.05762	5.64271	1.67399e-08	1.64912e-07
ENSMUSG00000009030	1101.21	0.371953	0.0726818	5.11755	3.09528e-07	2.59693e-06
ENSMUSG00000009035	1209.88	-0.135693	0.100496	-1.35023	0.176941	0.340459
ENSMUSG00000009047	0	NA	NA	NA	NA	1
ENSMUSG00000009070	4.79181	-0.545163	0.766536	-0.711204	0.476958	0.664753
ENSMUSG00000009073	4183.6	0.0771017	0.0596769	1.29199	0.196362	0.367192
ENSMUSG00000009075	93.8392	-0.18298	0.181168	-1.01	0.312494	0.507067
ENSMUSG00000009076	104.908	0.218961	0.179537	1.21959	0.222621	0.40237
ENSMUSG00000009079	8984.68	0.361777	0.070332	5.14384	2.69172e-07	2.27649e-06
ENSMUSG00000009090	2348.95	-0.267872	0.0723741	-3.70121	0.000214572	0.00111501
ENSMUSG00000009092	25.329	0.796456	0.314045	2.53612	0.0112089	0.0374274
ENSMUSG00000009093	0	NA	NA	NA	NA	1
ENSMUSG00000009097	28.4282	0.0578043	0.314341	0.18389	0.854099	0.92474
ENSMUSG00000009108	5.96166	0.0157793	0.631303	0.0249948	0.980059	0.990268
ENSMUSG00000009112	1283.8	0.115579	0.0618564	1.8685	0.0616927	0.153156
ENSMUSG00000009114	0	NA	NA	NA	NA	1
ENSMUSG00000009115	2.4361	-0.119754	1.01351	-0.118158	0.905943	0.953738
ENSMUSG00000009145	36.064	-0.323941	0.268545	-1.20628	0.227709	0.408814
ENSMUSG00000009185	0	NA	NA	NA	NA	1
ENSMUSG00000009207	824.846	-0.101708	0.075108	-1.35415	0.175688	0.3389
ENSMUSG00000009210	1.18674	0.112009	1.3317	0.0841098	0.932969	1
ENSMUSG00000009214	0.377155	0.757606	2.62212	0.288928	0.772636	1
ENSMUSG00000009216	197.365	-0.207522	0.214433	-0.967771	0.333159	0.529871
ENSMUSG00000009246	58.5444	-0.120462	0.340083	-0.354214	0.723178	0.845589
ENSMUSG00000009248	3.11057	-0.829688	0.863254	-0.961117	0.336493	0.533352
ENSMUSG00000009281	31.5093	-0.0589263	0.296327	-0.198855	0.842376	0.917944
ENSMUSG00000009291	862.222	0.0359775	0.0706485	0.509246	0.610579	0.767704
ENSMUSG00000009292	216.722	-0.655656	0.137131	-4.78124	1.74216e-06	1.31001e-05
ENSMUSG00000009293	866.632	0.426102	0.0821048	5.18973	2.10596e-07	1.80378e-06
ENSMUSG00000009350	8.02709	-0.662648	0.747559	-0.886416	0.375393	0.573491
ENSMUSG00000009356	25.2021	-1.85852	0.351915	-5.28116	1.28369e-07	1.13566e-06
ENSMUSG00000009376	160.532	0.364643	0.148383	2.45745	0.0139929	0.0451297
ENSMUSG00000009378	95.741	-0.256181	0.27944	-0.916765	0.359266	0.557366
ENSMUSG00000009394	1448.55	-0.657785	0.0751786	-8.74963	2.14054e-18	5.16053e-17
ENSMUSG00000009406	1450.81	0.152658	0.0892939	1.70961	0.0873372	0.201568
ENSMUSG00000009418	8686.08	-0.103073	0.0681662	-1.51209	0.130511	0.272711
ENSMUSG00000009470	4484.2	0.128466	0.081666	1.57306	0.115704	0.249832
ENSMUSG00000009471	0.871681	-1.21845	1.64295	-0.741626	0.458314	1
ENSMUSG00000009487	5.46405	-1.09573	0.654816	-1.67334	0.0942604	0.213795
ENSMUSG00000009535	1488.26	0.199449	0.100657	1.98148	0.047538	0.123927
ENSMUSG00000009545	26.8355	-0.155823	0.312645	-0.498403	0.6182	0.773668
ENSMUSG00000009549	1574.62	0.0764078	0.0642024	1.19011	0.234004	0.416597
ENSMUSG00000009551	73.0964	-0.259564	0.179194	-1.44851	0.147474	0.298578
ENSMUSG00000009555	1227.8	0.0173141	0.068728	0.251922	0.801101	0.893461
ENSMUSG00000009563	443.983	0.124957	0.104677	1.19374	0.232581	0.414705
ENSMUSG00000009566	353.925	-0.0667114	0.102676	-0.649727	0.515868	0.696092
ENSMUSG00000009569	1086.85	0.107264	0.0825976	1.29864	0.194068	0.363911
ENSMUSG00000009575	8931.88	0.116481	0.0731243	1.59292	0.111177	0.242262
ENSMUSG00000009580	0	NA	NA	NA	NA	1
ENSMUSG00000009585	108.981	1.10139	0.190373	5.78545	7.23167e-09	7.41078e-08
ENSMUSG00000009588	0.706722	-1.94768	1.94282	-1.0025	0.316103	1
ENSMUSG00000009596	15.4975	-0.0182662	0.434825	-0.0420081	0.966492	0.983855
ENSMUSG00000009614	119.752	-0.470245	0.147181	-3.19502	0.00139821	0.00606626
ENSMUSG00000009621	1831.46	0.165823	0.0593761	2.79276	0.00522605	0.0193597
ENSMUSG00000009628	182.154	-0.207552	0.177648	-1.16833	0.242672	0.427362
ENSMUSG00000009630	1639.98	0.0412636	0.0728824	0.566167	0.57128	0.738694
ENSMUSG00000009633	17.1198	-0.00716402	0.384239	-0.0186447	0.985125	0.992836
ENSMUSG00000009640	613.811	-0.0754159	0.0962379	-0.78364	0.433251	0.626775
ENSMUSG00000009646	0.981833	-1.54403	2.07364	-0.744602	0.456512	1
ENSMUSG00000009647	586.148	-0.20797	0.0927331	-2.24268	0.0249177	0.0731956
ENSMUSG00000009654	6.28491	0.241163	0.594435	0.405701	0.684962	0.821232
ENSMUSG00000009670	3.02223	0.339714	1.08775	0.312308	0.754806	0.865225
ENSMUSG00000009681	3449.92	-0.156681	0.0768072	-2.03993	0.0413574	0.110626
ENSMUSG00000009687	223.378	-0.828967	0.218265	-3.79798	0.00014588	0.000784325
ENSMUSG00000009731	190.317	-0.142338	0.137979	-1.03159	0.302265	0.495552
ENSMUSG00000009733	970.298	-0.169789	0.0810809	-2.09407	0.0362535	0.0993684
ENSMUSG00000009734	307.865	-1.64385	0.120862	-13.601	3.94742e-42	3.98114e-40
ENSMUSG00000009739	3808.69	0.281669	0.0895007	3.14712	0.0016489	0.00701557
ENSMUSG00000009741	4045.64	0.126155	0.0618812	2.03866	0.0414836	0.110902
ENSMUSG00000009772	428.476	-0.772257	0.10653	-7.2492	4.19253e-13	6.53025e-12
ENSMUSG00000009828	2412.11	-0.11403	0.077436	-1.47257	0.140867	0.288712
ENSMUSG00000009863	2176.78	-0.000956795	0.063517	-0.0150636	0.987981	0.994308
ENSMUSG00000009876	16.3767	-0.324046	0.386457	-0.838506	0.401747	0.598049
ENSMUSG00000009894	3892.08	-0.52413	0.0736607	-7.11546	1.11538e-12	1.67583e-11
ENSMUSG00000009900	17.4815	0.930381	0.374817	2.48223	0.0130563	0.0425568
ENSMUSG00000009905	439.445	-0.0069074	0.0942022	-0.0733253	0.941547	0.971406
ENSMUSG00000009907	944.63	0.427906	0.0751098	5.69707	1.21886e-08	1.2166e-07
ENSMUSG00000009927	1368.51	0.297535	0.058631	5.07471	3.88089e-07	3.19405e-06
ENSMUSG00000009941	11.7325	0.130635	0.614552	0.212569	0.831663	0.91224
ENSMUSG00000009995	1060.61	0.0845659	0.0816937	1.03516	0.300595	0.493884
ENSMUSG00000010021	36.2409	-0.560522	0.264695	-2.11762	0.0342076	0.0949535
ENSMUSG00000010025	670.003	0.0648039	0.078961	0.820708	0.411813	0.607615
ENSMUSG00000010044	97.0419	-0.0805531	0.170227	-0.473211	0.636062	0.786227
ENSMUSG00000010045	540.378	-0.21292	0.103115	-2.06488	0.0389346	0.105168
ENSMUSG00000010047	689.81	-0.00989936	0.0818388	-0.120962	0.903721	0.952822
ENSMUSG00000010048	191.47	0.162158	0.122296	1.32594	0.184858	0.351595
ENSMUSG00000010051	111.941	0.134242	0.165306	0.812084	0.416743	0.611572
ENSMUSG00000010054	937.869	-0.23277	0.0967467	-2.40597	0.0161296	0.0507497
ENSMUSG00000010057	738.938	0.0635297	0.0748677	0.84856	0.396126	0.592928
ENSMUSG00000010064	791.706	-0.284755	0.115701	-2.46114	0.0138498	0.0447157
ENSMUSG00000010066	3671.52	-1.07643	0.0877976	-12.2604	1.47784e-34	1.01912e-32
ENSMUSG00000010067	183.327	-0.0283332	0.121922	-0.232387	0.816237	0.902271
ENSMUSG00000010080	28.7665	-1.11011	0.32077	-3.46076	0.000538662	0.00257471
ENSMUSG00000010086	1408.37	-0.558808	0.0999991	-5.58813	2.29532e-08	2.22678e-07
ENSMUSG00000010095	2033.16	0.0106243	0.0686989	0.15465	0.877097	0.938069
ENSMUSG00000010097	4875.39	0.210096	0.0521925	4.0254	5.68792e-05	0.00033207
ENSMUSG00000010110	1820.61	0.0753347	0.0532656	1.41432	0.157268	0.313125
ENSMUSG00000010122	6.1008	-1.30683	0.769732	-1.69777	0.0895518	0.205752
ENSMUSG00000010136	24.8152	0.0212913	0.357871	0.0594943	0.952558	0.976895
ENSMUSG00000010142	14.1159	0.21239	0.42431	0.500554	0.616685	0.772532
ENSMUSG00000010154	729.803	-0.380889	0.0920813	-4.13644	3.52736e-05	0.000212176
ENSMUSG00000010175	1246.87	0.602926	0.284189	2.12157	0.033874	0.0941685
ENSMUSG00000010205	0.805148	1.3132	1.78335	0.736366	0.461508	1
ENSMUSG00000010277	4067.74	0.04034	0.0491599	0.820587	0.411882	0.607643
ENSMUSG00000010290	1051.44	0.0644936	0.0719139	0.896816	0.369817	0.568128
ENSMUSG00000010307	213.578	-0.0470823	0.136432	-0.345098	0.730021	0.850262
ENSMUSG00000010311	87.8181	-0.710762	0.219319	-3.24077	0.00119205	0.00525472
ENSMUSG00000010342	19.9107	-0.406463	0.366256	-1.10978	0.267095	0.4564
ENSMUSG00000010358	24.5192	-0.15501	0.364215	-0.425602	0.670398	0.811187
ENSMUSG00000010362	65.8402	0.695197	0.21544	3.22687	0.00125153	0.00549388
ENSMUSG00000010376	1515.67	0.0732146	0.071678	1.02144	0.307047	0.501219
ENSMUSG00000010392	1005.26	0.150182	0.0710832	2.11277	0.0346204	0.0958246
ENSMUSG00000010406	669.73	-0.0539519	0.0895911	-0.602202	0.54704	0.719547
ENSMUSG00000010435	0.1177	0.803691	3.53381	0.227429	0.82009	1
ENSMUSG00000010453	2081.52	-0.154157	0.0605591	-2.54556	0.0109101	0.0365929
ENSMUSG00000010461	122.029	0.721193	0.142743	5.05239	4.36327e-07	3.56319e-06
ENSMUSG00000010476	4926.99	-3.94083	0.26445	-14.902	3.19944e-50	4.7221e-48
ENSMUSG00000010492	34.8232	-0.089099	0.282385	-0.315523	0.752365	0.863039
ENSMUSG00000010505	2265.49	0.457308	0.0698678	6.54534	5.93619e-11	7.6145e-10
ENSMUSG00000010517	1246.07	-0.147412	0.0818993	-1.79992	0.0718732	0.173362
ENSMUSG00000010529	6.15423	-0.593075	0.613497	-0.966713	0.333688	0.530538
ENSMUSG00000010538	38.1001	0.210848	0.261795	0.805393	0.420593	0.61491
ENSMUSG00000010554	1102.29	-0.0639003	0.072824	-0.877462	0.380236	0.577812
ENSMUSG00000010592	18.122	0.425705	0.47787	0.890838	0.373016	0.571338
ENSMUSG00000010601	0.220571	0.0823571	3.53381	0.0233054	0.981407	1
ENSMUSG00000010607	172.272	0.160296	0.129135	1.24131	0.214493	0.391332
ENSMUSG00000010608	6266.56	0.242913	0.068743	3.53363	0.000409893	0.00200758
ENSMUSG00000010609	212.254	-0.361468	0.115353	-3.13358	0.00172687	0.00730493
ENSMUSG00000010651	28.4027	-0.786526	0.357947	-2.19733	0.0279972	0.0804645
ENSMUSG00000010660	308.77	-0.444026	0.155874	-2.84861	0.00439102	0.016659
ENSMUSG00000010663	4311.22	-0.0680759	0.0685024	-0.993773	0.320333	0.515845
ENSMUSG00000010721	716.254	-0.44202	0.0880182	-5.02192	5.11583e-07	4.12487e-06
ENSMUSG00000010751	96.2598	-0.109612	0.167918	-0.652772	0.513903	0.694918
ENSMUSG00000010755	1073.63	-0.107442	0.0671507	-1.60002	0.109594	0.239784
ENSMUSG00000010760	1.72452	-2.59355	1.39432	-1.86009	0.0628727	1
ENSMUSG00000010796	1.50128	0.221379	1.509	0.146705	0.883365	1
ENSMUSG00000010797	3.58636	-1.33287	0.89586	-1.48781	0.136802	0.282316
ENSMUSG00000010803	592.107	-1.63634	0.120806	-13.5452	8.45967e-42	8.39207e-40
ENSMUSG00000010825	64.5894	0.697321	0.266873	2.61294	0.00897681	0.0308773
ENSMUSG00000010830	56.2414	-0.606909	0.252246	-2.40603	0.0161271	0.0507485
ENSMUSG00000010841	0.485961	-2.3622	2.36838	-0.997394	0.318573	1
ENSMUSG00000010911	241.949	0.226705	0.127031	1.78465	0.0743187	0.178072
ENSMUSG00000010914	818.502	-0.084611	0.0735548	-1.15031	0.250015	0.43609
ENSMUSG00000010936	1111.96	-0.0505225	0.0796951	-0.633948	0.526115	0.704033
ENSMUSG00000011008	3.52181	-1.55477	0.876167	-1.77451	0.0759783	0.181134
ENSMUSG00000011034	2.36101	-1.36487	1.08404	-1.25906	0.208009	0.383433
ENSMUSG00000011096	1103.07	0.216029	0.11074	1.95077	0.051084	0.131374
ENSMUSG00000011114	833.374	-0.0653217	0.0837362	-0.78009	0.435338	0.62857
ENSMUSG00000011118	0.265593	0.0823582	3.36259	0.0244925	0.98046	1
ENSMUSG00000011148	41.4181	-0.933291	0.289061	-3.22869	0.00124357	0.0054639
ENSMUSG00000011154	12.763	0.240764	0.431867	0.557495	0.577189	0.743408
ENSMUSG00000011158	1122.1	0.304382	0.059656	5.10228	3.35582e-07	2.79613e-06
ENSMUSG00000011171	47.2483	0.306741	0.245224	1.25086	0.210985	0.386944
ENSMUSG00000011179	1554.02	0.77901	0.0719388	10.8288	2.51452e-27	1.06592e-25
ENSMUSG00000011254	299.011	0.0906858	0.132144	0.686263	0.492547	0.676906
ENSMUSG00000011256	1160.19	-0.0539037	0.077173	-0.698478	0.484878	0.670807
ENSMUSG00000011257	799.973	0.0680872	0.0750951	0.90668	0.364576	0.562971
ENSMUSG00000011263	13.0035	0.126702	0.44592	0.284135	0.776307	0.879417
ENSMUSG00000011267	13.971	-0.644379	0.437481	-1.47293	0.14077	0.288561
ENSMUSG00000011305	19.1354	-0.793269	0.360051	-2.20321	0.0275797	0.0795479
ENSMUSG00000011306	1311.77	-0.0673234	0.0706324	-0.953153	0.340513	0.537565
ENSMUSG00000011349	2.71278	-0.210965	1.05606	-0.199767	0.841663	0.917612
ENSMUSG00000011350	0	NA	NA	NA	NA	1
ENSMUSG00000011382	137.789	-0.627755	0.161039	-3.89814	9.69339e-05	0.000541992
ENSMUSG00000011427	683.876	0.14275	0.084143	1.69652	0.0897873	0.206137
ENSMUSG00000011463	1.49733	0.29989	1.33571	0.224517	0.822355	1
ENSMUSG00000011486	4.98079	-0.0902347	0.907685	-0.0994119	0.920811	0.960758
ENSMUSG00000011589	1291.01	-0.500699	0.0973221	-5.14476	2.67857e-07	2.26933e-06
ENSMUSG00000011632	0.935976	0.813931	1.57665	0.516242	0.605685	1
ENSMUSG00000011658	317.292	-0.129135	0.123056	-1.0494	0.293994	0.486772
ENSMUSG00000011751	1938.45	-0.920153	0.0803579	-11.4507	2.33303e-30	1.20923e-28
ENSMUSG00000011752	234.764	-0.141318	0.144199	-0.980026	0.327073	0.523404
ENSMUSG00000011831	1170.11	0.10968	0.082772	1.32509	0.185141	0.351946
ENSMUSG00000011832	3130.82	-0.354161	0.0694959	-5.09614	3.46641e-07	2.88331e-06
ENSMUSG00000011837	441.781	-0.0226614	0.111152	-0.203877	0.838449	0.915742
ENSMUSG00000011877	2932.56	-0.107459	0.0963201	-1.11564	0.264574	0.453471
ENSMUSG00000011884	303.812	-0.148092	0.159658	-0.927558	0.353637	0.55203
ENSMUSG00000011958	1397	0.503454	0.0865902	5.81422	6.0919e-09	6.28803e-08
ENSMUSG00000011960	1864.21	0.208865	0.0866424	2.41066	0.0159238	0.0502262
ENSMUSG00000012017	152.212	-0.23557	0.199434	-1.18119	0.237527	0.421136
ENSMUSG00000012042	0.107636	0.803691	3.53381	0.227429	0.82009	1
ENSMUSG00000012076	1221.24	0.143387	0.0704424	2.03552	0.0417984	0.111498
ENSMUSG00000012114	1473.1	-0.0460238	0.0877693	-0.524373	0.600019	0.759278
ENSMUSG00000012117	946.771	0.0785941	0.0680049	1.15571	0.247799	0.433662
ENSMUSG00000012123	17.0483	-1.62515	0.49813	-3.26249	0.00110437	0.00489582
ENSMUSG00000012126	279.746	-0.535372	0.130684	-4.09668	4.19119e-05	0.000249503
ENSMUSG00000012187	1.81789	-0.464828	1.21653	-0.382093	0.702392	1
ENSMUSG00000012211	1.87983	-0.042041	1.16997	-0.0359333	0.971336	1
ENSMUSG00000012282	0.605707	-1.64377	2.04393	-0.804223	0.421268	1
ENSMUSG00000012296	660.923	0.255629	0.111785	2.28678	0.0222085	0.0662912
ENSMUSG00000012350	5.03125	0.080947	0.713582	0.113438	0.909684	0.955391
ENSMUSG00000012396	3.13953	-0.744151	1.01844	-0.730676	0.464977	0.654207
ENSMUSG00000012405	1526.02	-0.242937	0.130225	-1.86552	0.0621083	0.153998
ENSMUSG00000012422	1577.84	0.0866912	0.0918492	0.943842	0.34525	0.543008
ENSMUSG00000012428	6.57521	-0.395956	0.761087	-0.520251	0.602889	0.761277
ENSMUSG00000012429	355.438	0.187718	0.104476	1.79676	0.0723736	0.174378
ENSMUSG00000012443	811.716	1.74399	0.0943905	18.4764	3.20038e-76	1.1562e-73
ENSMUSG00000012483	370.601	0.367837	0.130389	2.82108	0.00478629	0.0179171
ENSMUSG00000012519	6.57291	0.289733	0.650748	0.44523	0.656153	0.801805
ENSMUSG00000012520	70.6417	-5.948	1.34666	-4.41684	1.00153e-05	6.6709e-05
ENSMUSG00000012535	2733.71	0.350559	0.0542512	6.46177	1.03483e-10	1.29783e-09
ENSMUSG00000012609	627.526	0.180684	0.0845736	2.13641	0.032646	0.0913569
ENSMUSG00000012640	776.192	-0.121583	0.113796	-1.06842	0.285329	0.477423
ENSMUSG00000012705	4.2449	0.629469	0.752062	0.836991	0.402597	0.598616
ENSMUSG00000012777	5.628	-0.882825	0.774153	-1.14037	0.25413	0.441261
ENSMUSG00000012819	313.431	-1.09356	0.137736	-7.93953	2.02945e-15	3.87099e-14
ENSMUSG00000012848	6182.38	0.271269	0.0638031	4.25167	2.12183e-05	0.000133123
ENSMUSG00000012889	11.3632	-0.423614	0.494661	-0.856372	0.391792	0.588861
ENSMUSG00000013033	10862.9	-0.216135	0.0793991	-2.72214	0.00648616	0.0233593
ENSMUSG00000013076	1792.99	0.197743	0.0684373	2.8894	0.00385976	0.0148814
ENSMUSG00000013083	0.218335	0.0823571	3.53381	0.0233054	0.981407	1
ENSMUSG00000013089	486.016	0.317052	0.115483	2.74545	0.00604282	0.0219817
ENSMUSG00000013091	8.93198	-0.414681	0.527012	-0.786853	0.431368	0.625113
ENSMUSG00000013150	1063.21	-0.307404	0.0668455	-4.59872	4.25099e-06	3.01392e-05
ENSMUSG00000013155	187.137	0.136259	0.129538	1.05189	0.292851	0.485718
ENSMUSG00000013158	16.5309	-0.337102	0.40695	-0.828363	0.407465	0.603117
ENSMUSG00000013160	2466.85	-0.260845	0.0633793	-4.11562	3.86144e-05	0.000231066
ENSMUSG00000013236	22082.9	0.276636	0.0793217	3.48752	0.000487526	0.00235024
ENSMUSG00000013275	1019.12	-0.0566635	0.138019	-0.410548	0.681404	0.818977
[truncated: 54,049 more rows]

## Sheet: Mus_Ctx16vCb16
ENSEMBL_ID	baseMean	log2FoldChange	lfcSE	stat	pvalue	padj
[truncated: 55,471 more rows]

[truncated: 3 more sheets: Mus_Ctx17vCb17, MusCtx18vCb18, Conserved_Mus_Cb.Ctx_Xen_FB.HB]
